# Supplementary material for: A Cognitive-Based Board Game With Augmented Reality for Older Adults: Development and Usability Study
Source: PubMed Central journal article supplement (PMC7769693; doi:10.2196/22007), 2020-12-14

# 60年代印象之問卷調查

親愛的朋友，您好：

感謝您撥空填寫這一份問卷，本問卷目的是在探討50歲~59歲的人對於60年代有那些印象及看法。問卷採匿名的方式，而且您在問卷中所提供的資訊，僅作為學術研究之用，不會提供其他單位，敬請安心填寫。您的意見對我們非常重要，衷心期盼您依自己的實際感受填答。感謝您的熱情支持與協助！

敬祝 平安快樂，萬事如意！

\*必填

## 基本資料

性別 \*

男

女

請問您的教育程度？ \*

國中以下

國中

高中

大學

研究所以上

請問您的年齡？ \*

您的回答

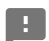

請問您的職業? \*

您的回答

## 60年代印象

1. 對於這張圖片有熟悉感。 \*

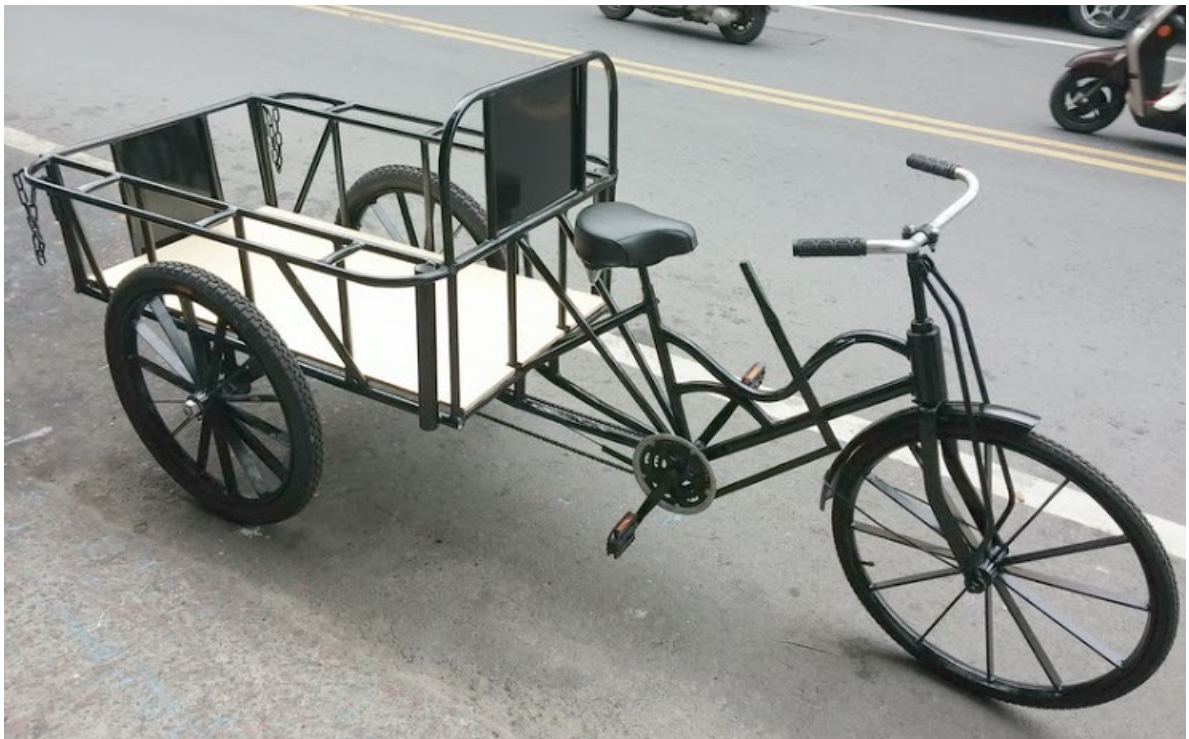

三輪車

- 非常不同意
- 不同意
- 有點不同意
- 普通
- 有點同意
- 同意
- 非常同意

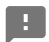

## 2. 對於這張圖片有熟悉感。 \*

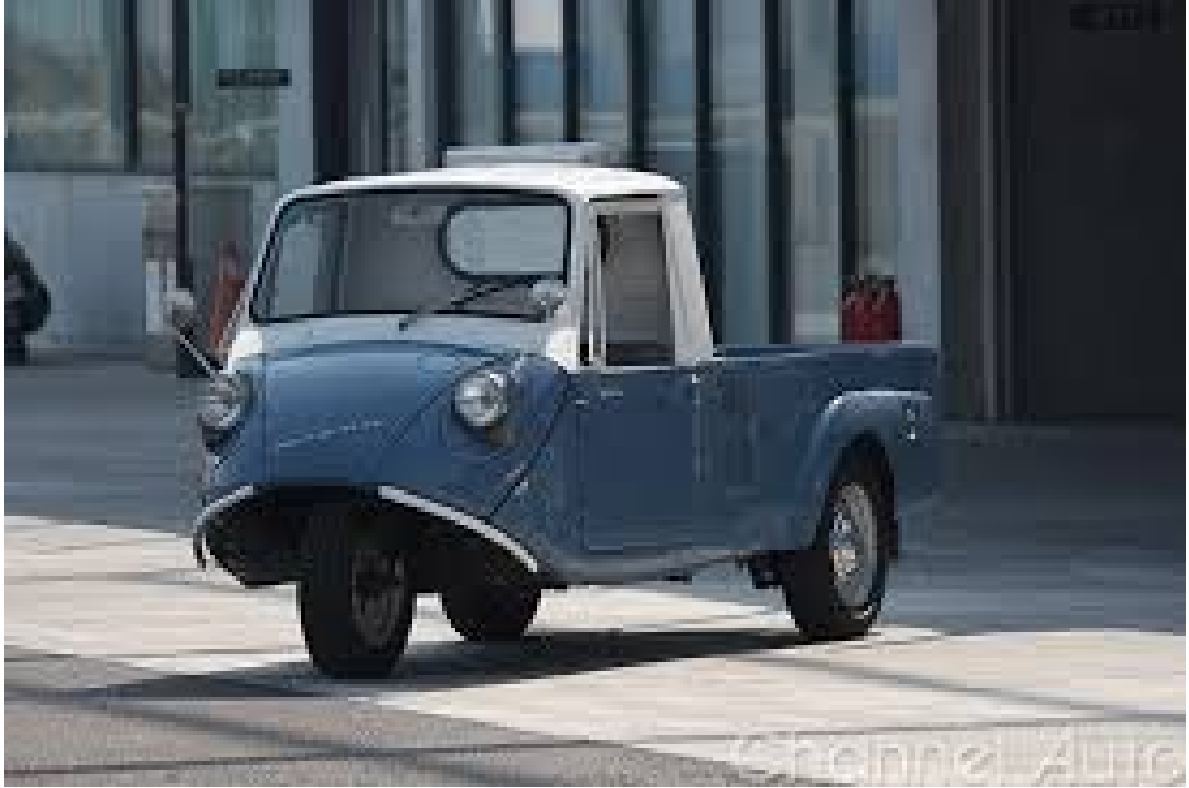

三輪貨車

- 非常不同意
- 不同意
- 有點不同意
- 普通
- 有點同意
- 同意
- 非常同意

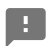

## 3. 對於這張圖片有熟悉感。 \*

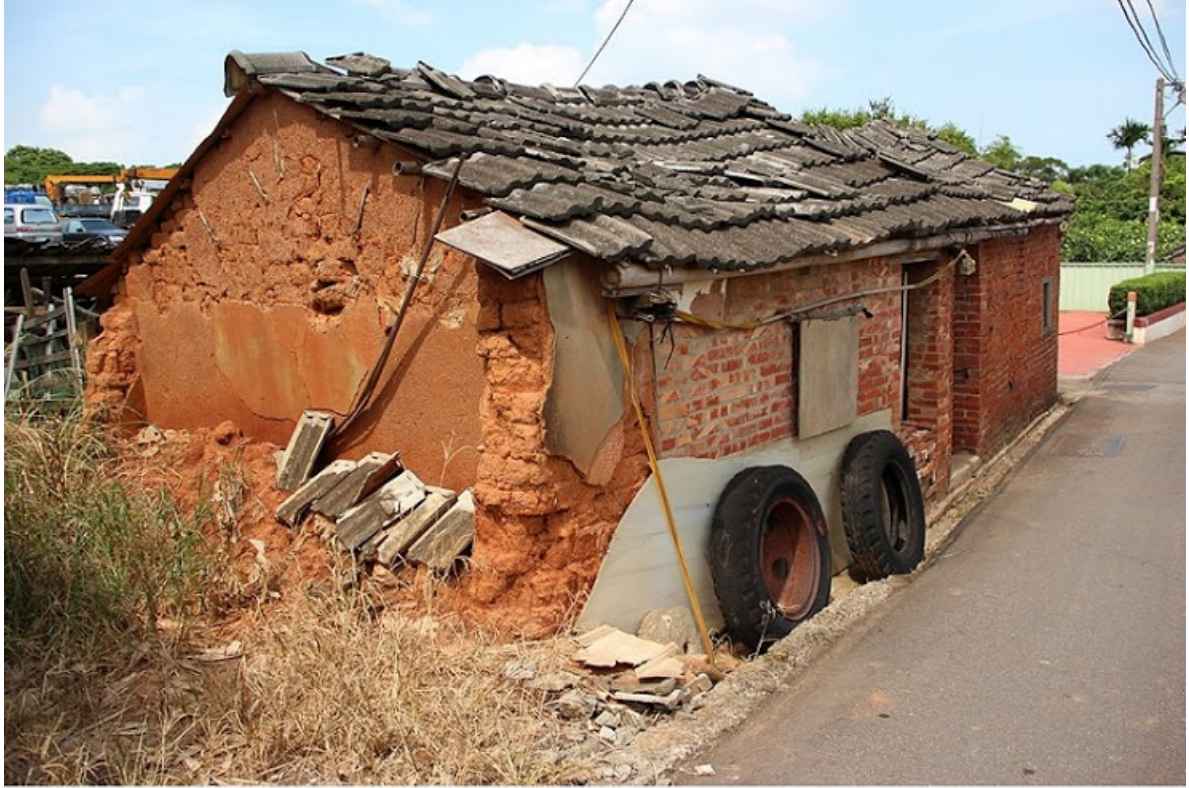

MissRita | ritall1836.pixnet.net/blog

土角厝

- 非常不同意
- 不同意
- 有點不同意
- 普通
- 有點同意
- 同意
- 非常同意

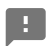



## 4. 對於這張圖片有熟悉感。 \*

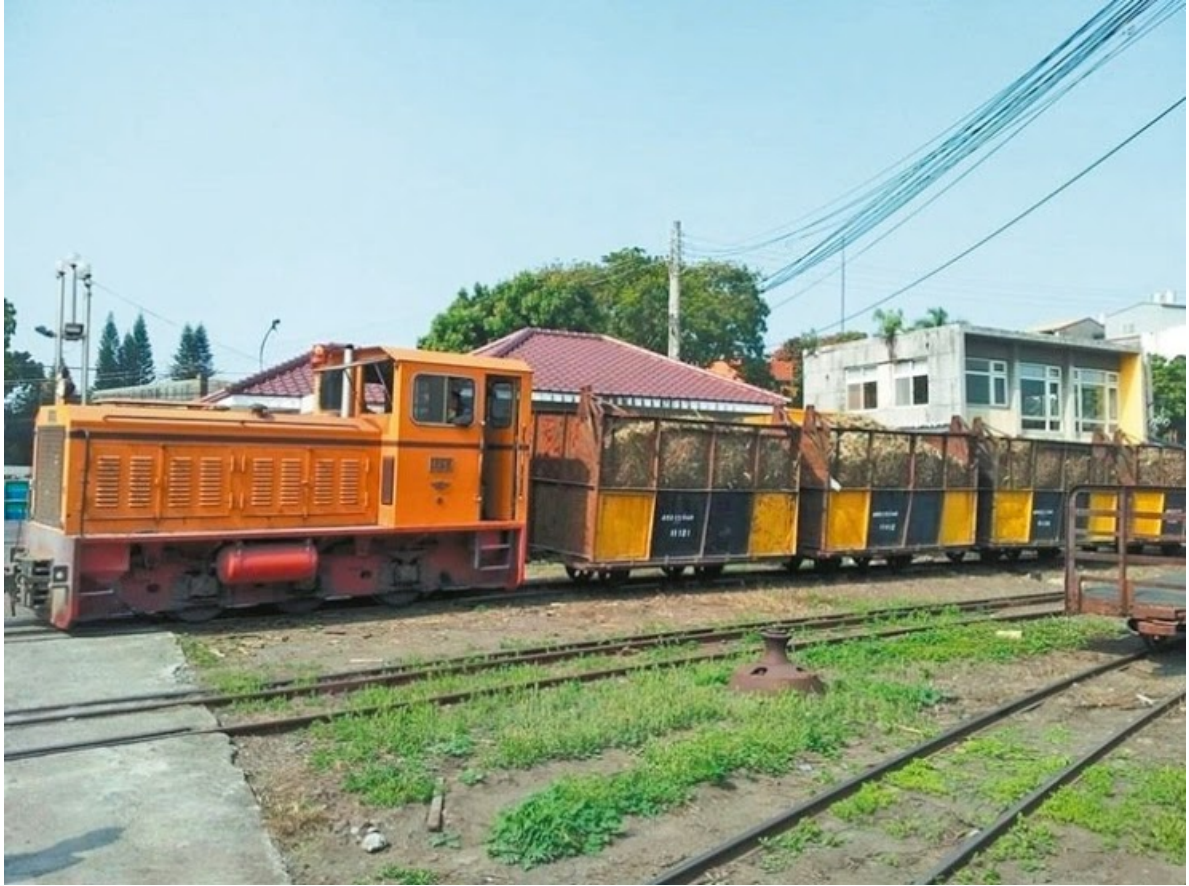

五分車

- 非常不同意
- 不同意
- 有點不同意
- 普通
- 有點同意
- 同意
- 非常同意



5. 對於這張圖片有熟悉感。 \*

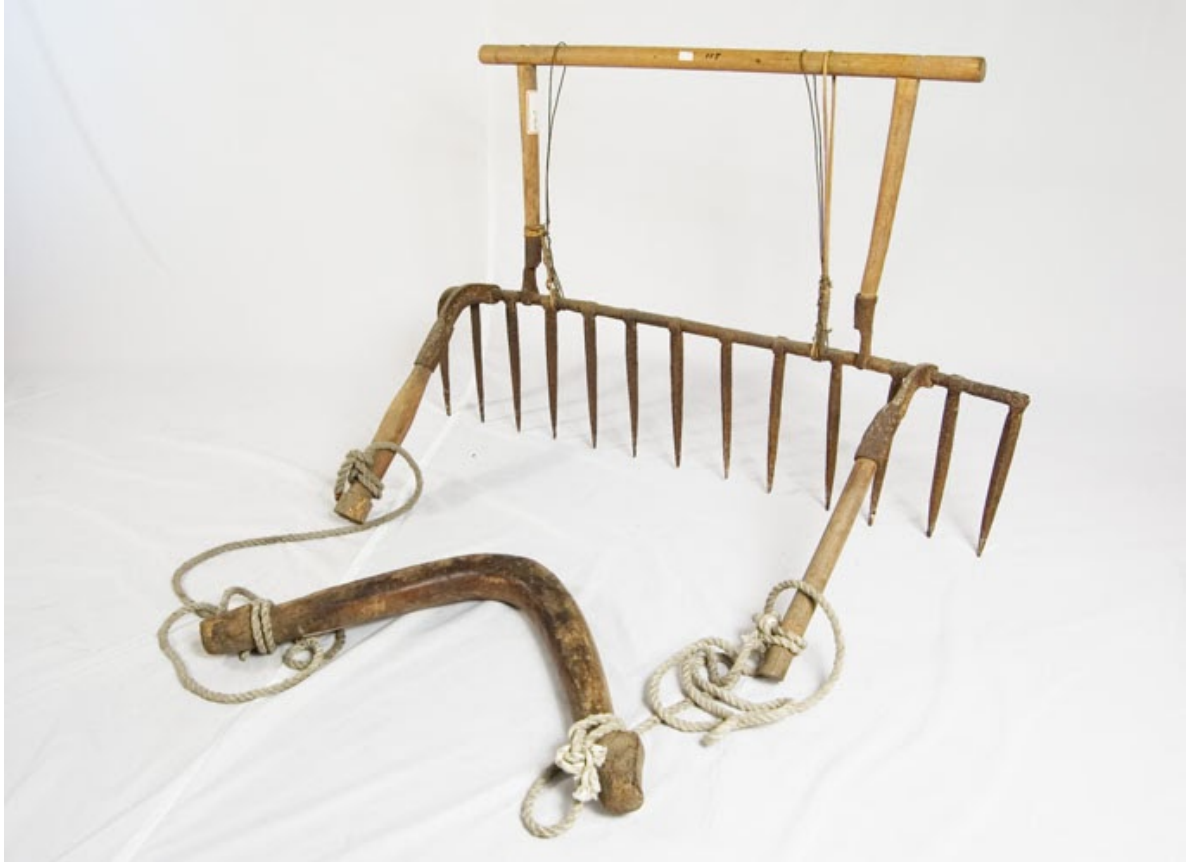

手耙

- 非常不同意
- 不同意
- 有點不同意
- 普通
- 有點同意
- 同意
- 非常同意

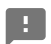

6. 對於這張圖片有熟悉感。 \*

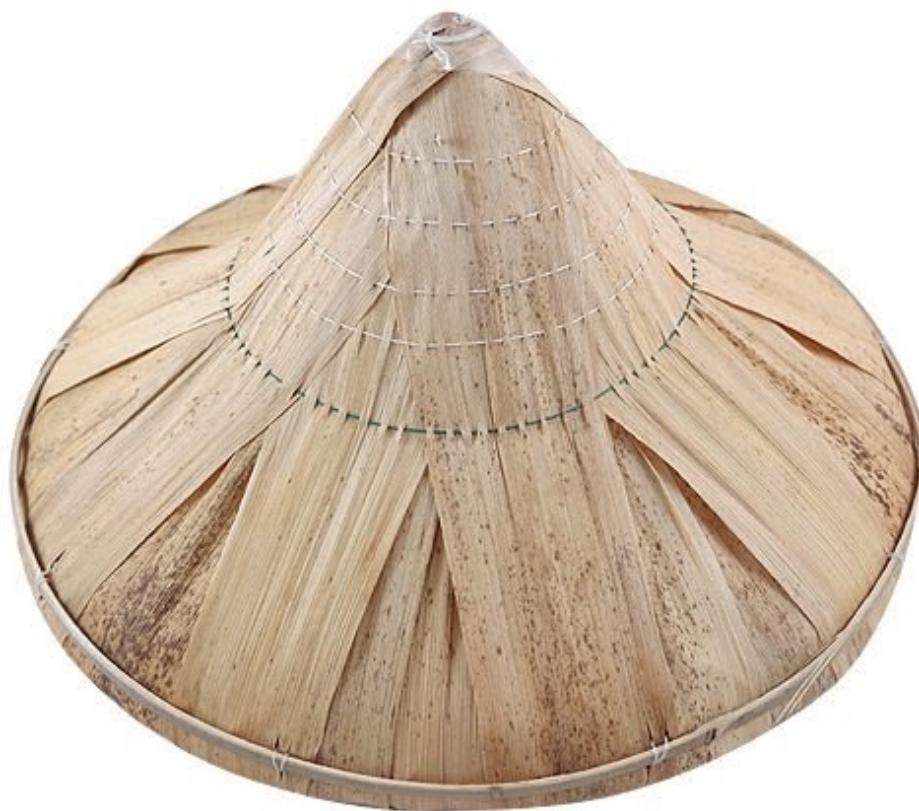

斗笠

- 非常不同意
- 不同意
- 有點不同意
- 普通
- 有點同意
- 同意
- 非常同意

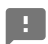

7. 對於這張圖片有熟悉感。 \*

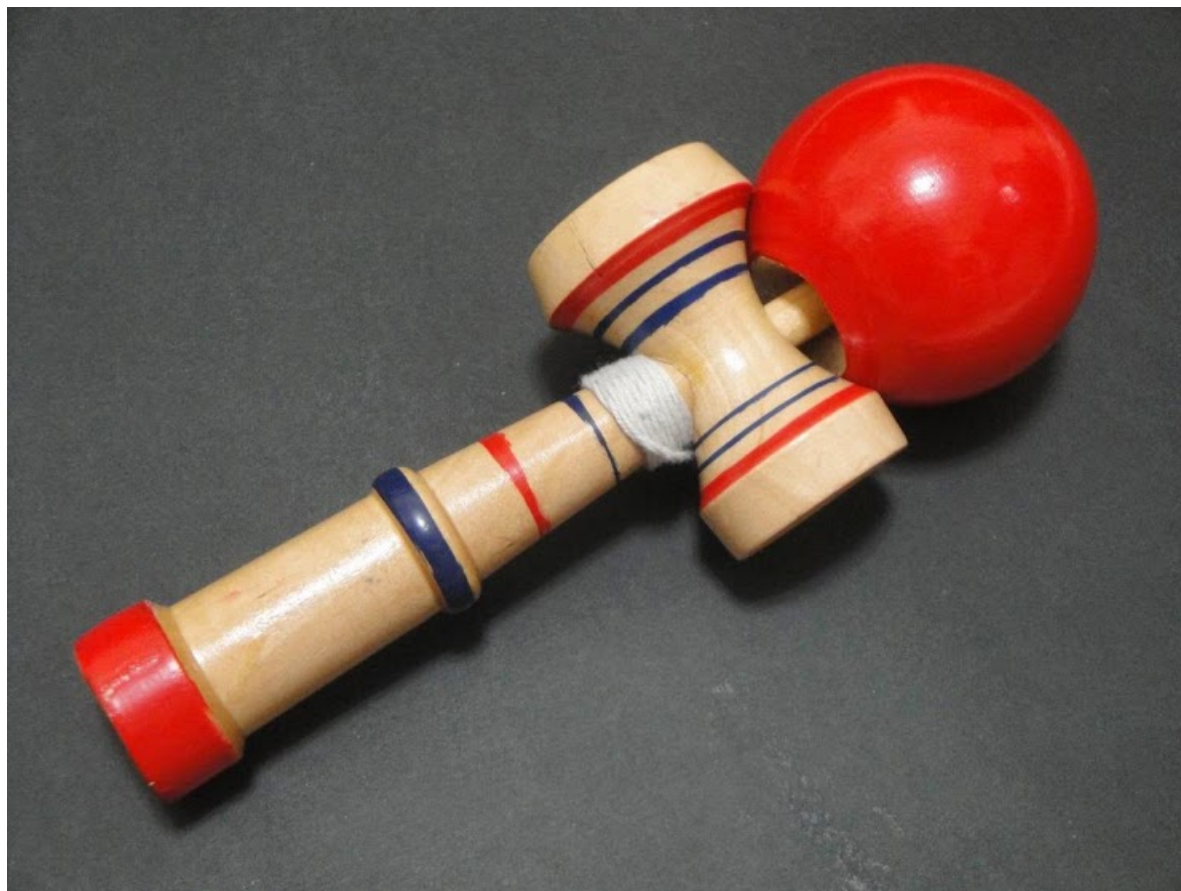

日月球

- 非常不同意
- 不同意
- 有點不同意
- 普通
- 有點同意
- 同意
- 非常同意

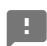



8. 對於這張圖片有熟悉感。 \*

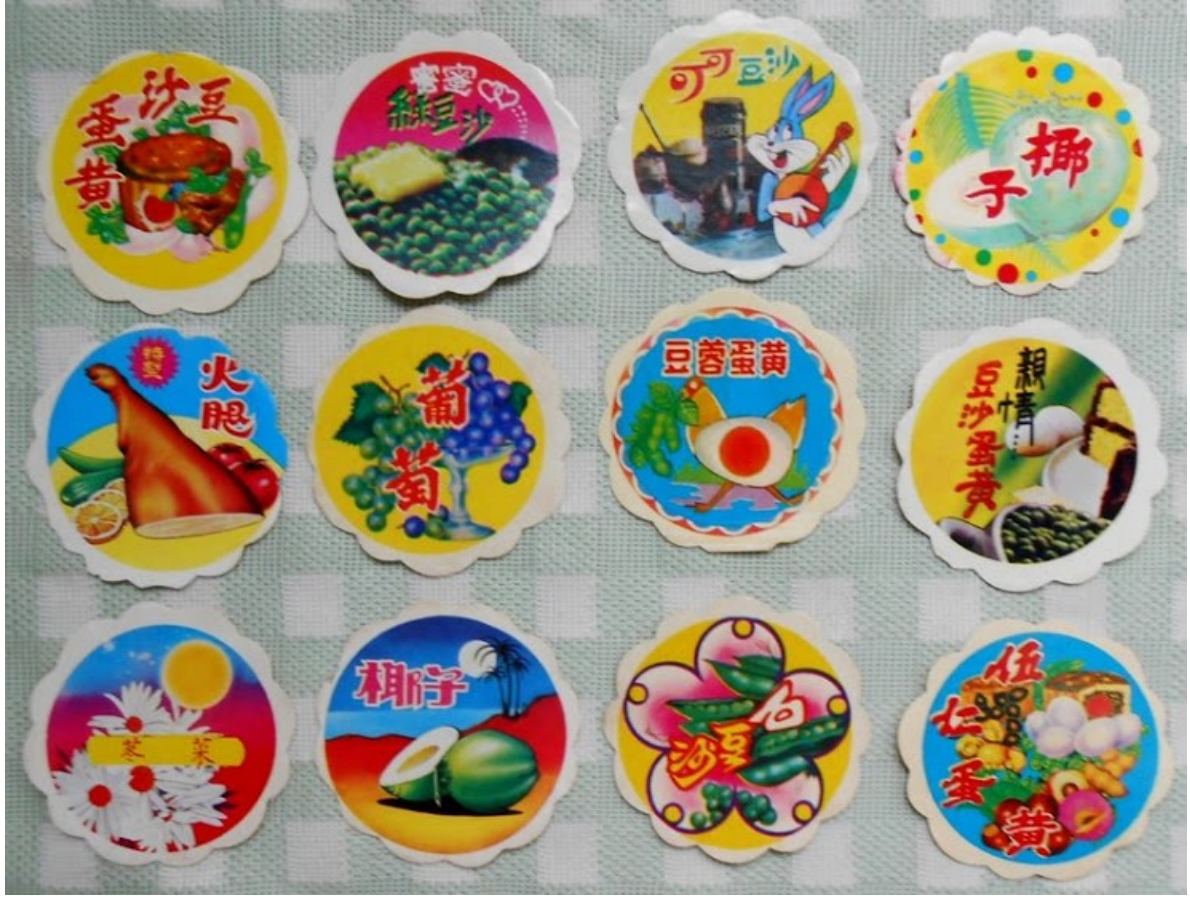

月餅標籤紙

- 非常不同意
- 不同意
- 有點不同意
- 普通
- 有點同意
- 同意
- 非常同意



9. 對於這張圖片有熟悉感。 \*

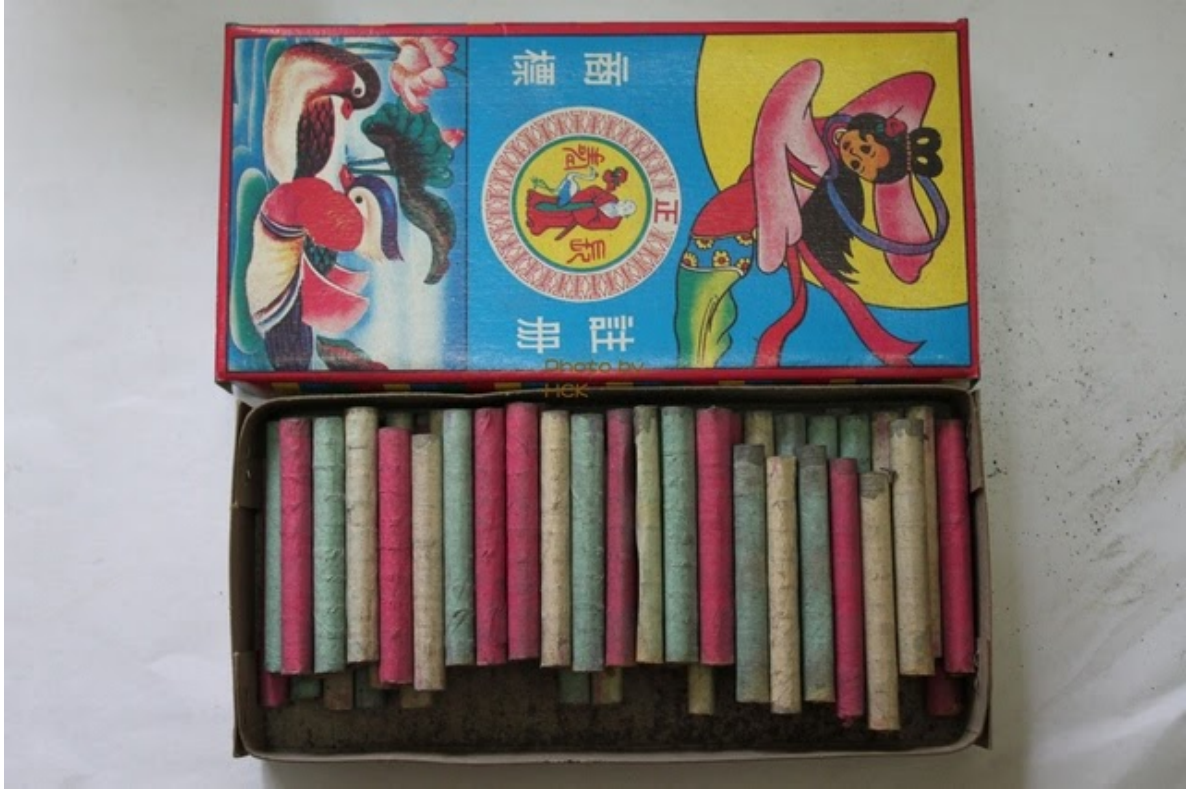

水鴛鴦

- 非常不同意
- 不同意
- 有點不同意
- 普通
- 有點同意
- 同意
- 非常同意



10. 對於這張圖片有熟悉感。 \*

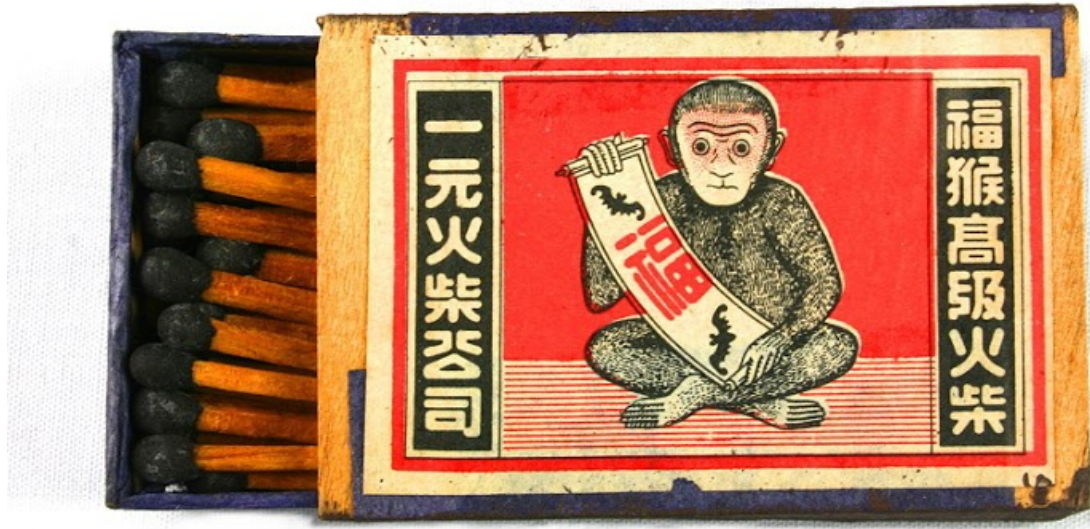

火柴盒

- 非常不同意
- 不同意
- 有點不同意
- 普通
- 有點同意
- 同意
- 非常同意





11. 對於這張圖片有熟悉感。 \*

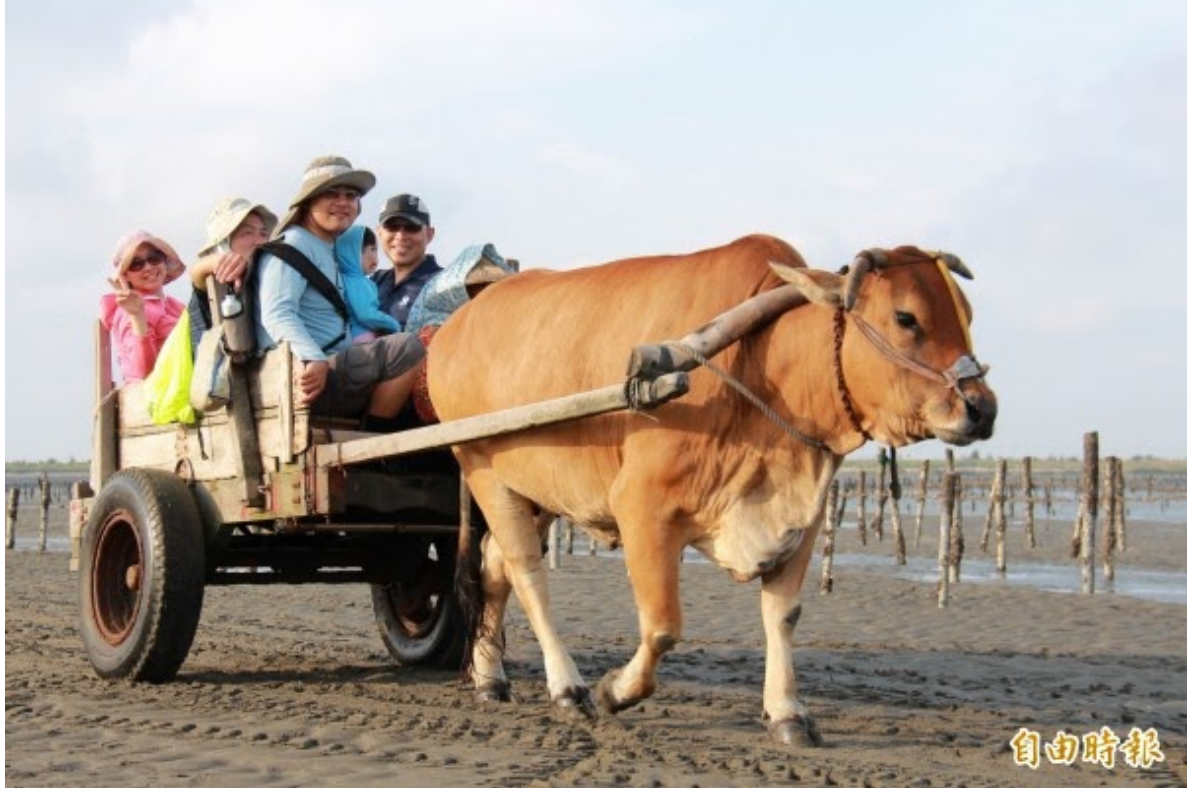

牛車

- 非常不同意
- 不同意
- 有點不同意
- 普通
- 有點同意
- 同意
- 非常同意





12. 對於這張圖片有熟悉感。 \*

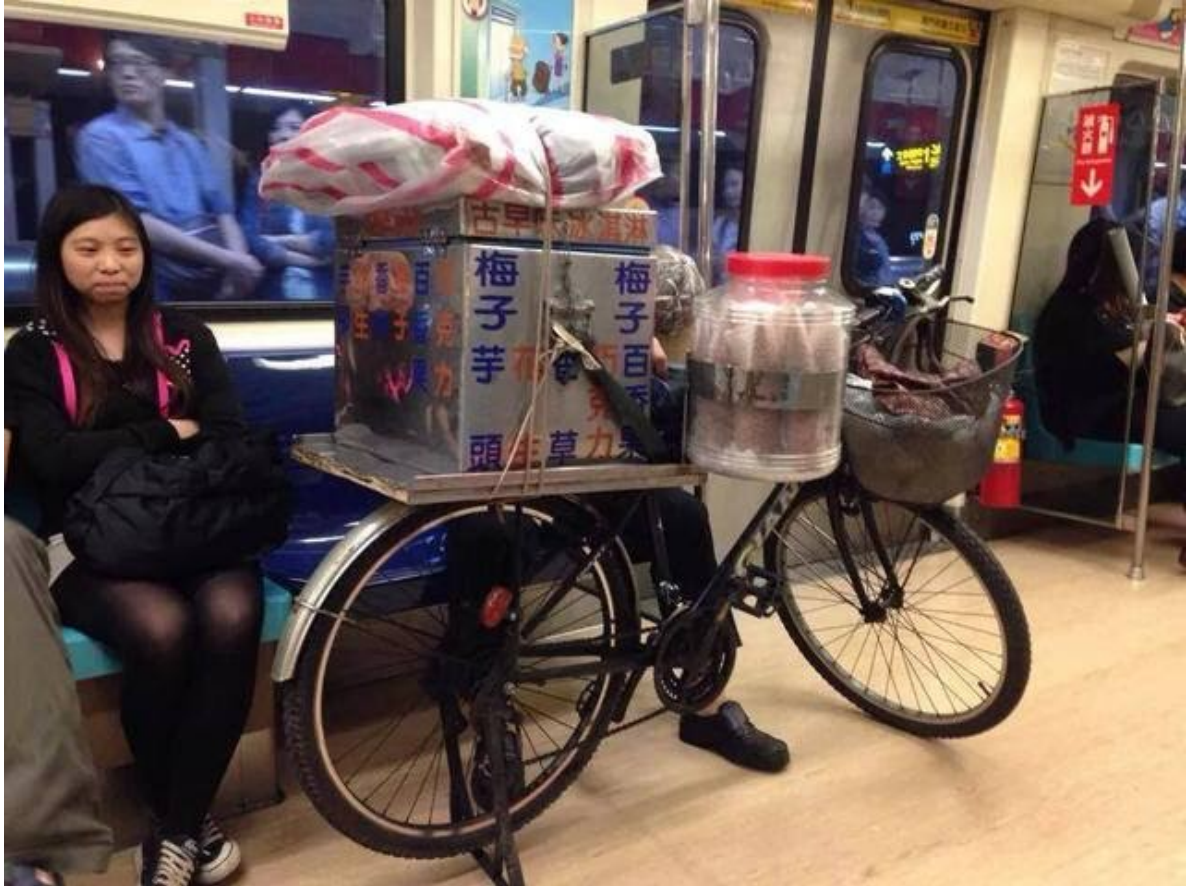

叫嘆車

- 非常不同意
- 不同意
- 有點不同意
- 普通
- 有點同意
- 同意
- 非常同意



13. 對於這張圖片有熟悉感。 \*

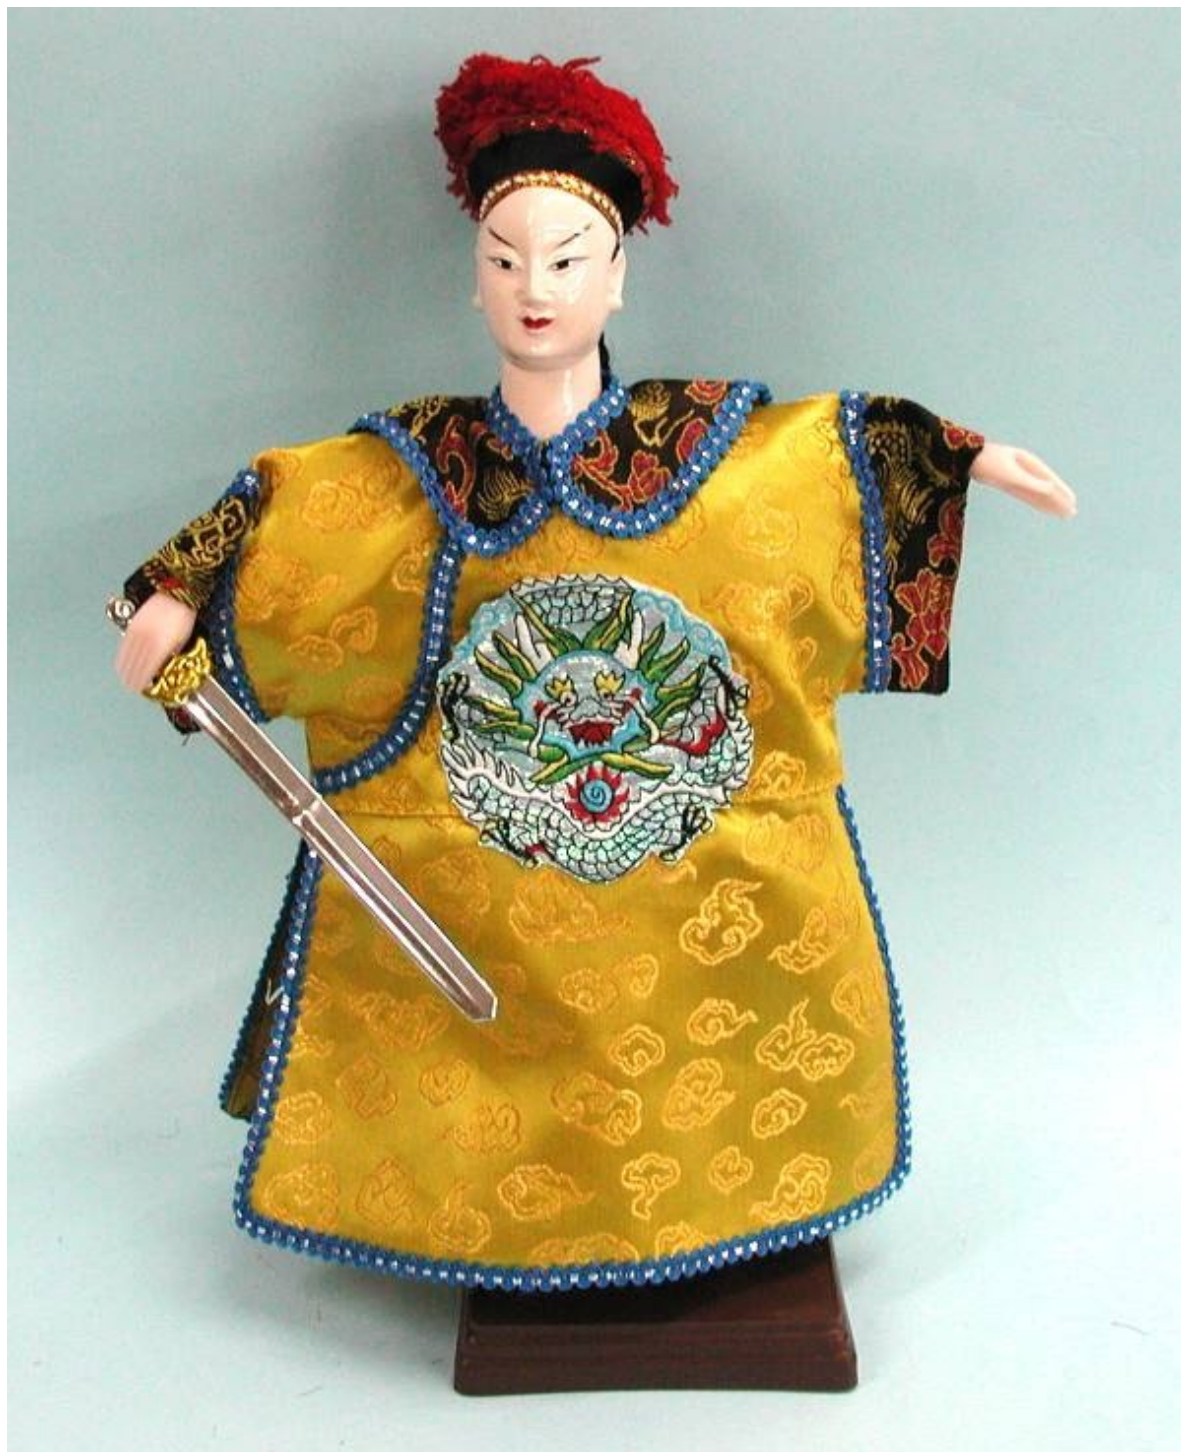

布袋戲布偶

- 非常不同意
- 不同意
- 有點不同意
- 普通
- 有點同意
- 同意

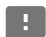



- 同意
- 非常同意

14. 對於這張圖片有熟悉感。 \*

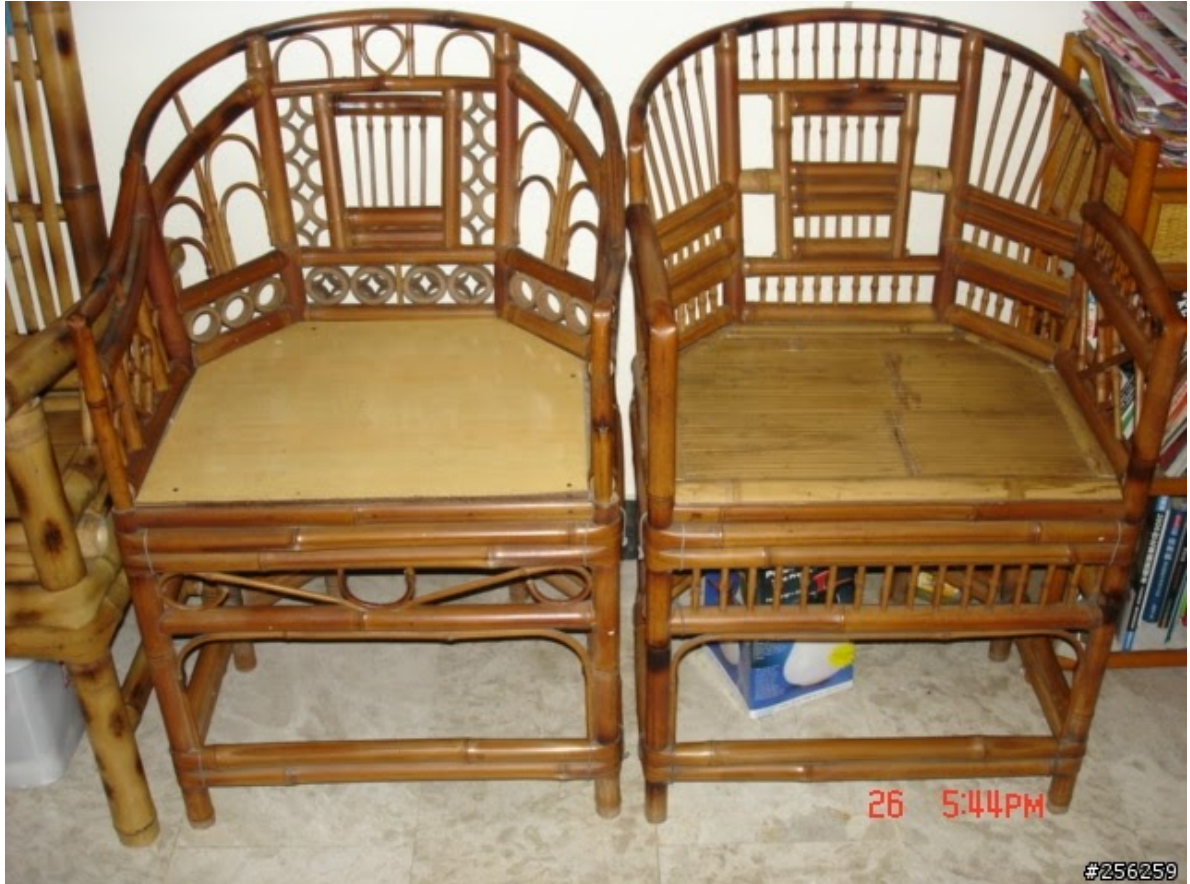

竹椅

- 非常不同意
- 不同意
- 有點不同意
- 普通
- 有點同意
- 同意
- 非常同意



15. 對於這張圖片有熟悉感。 \*

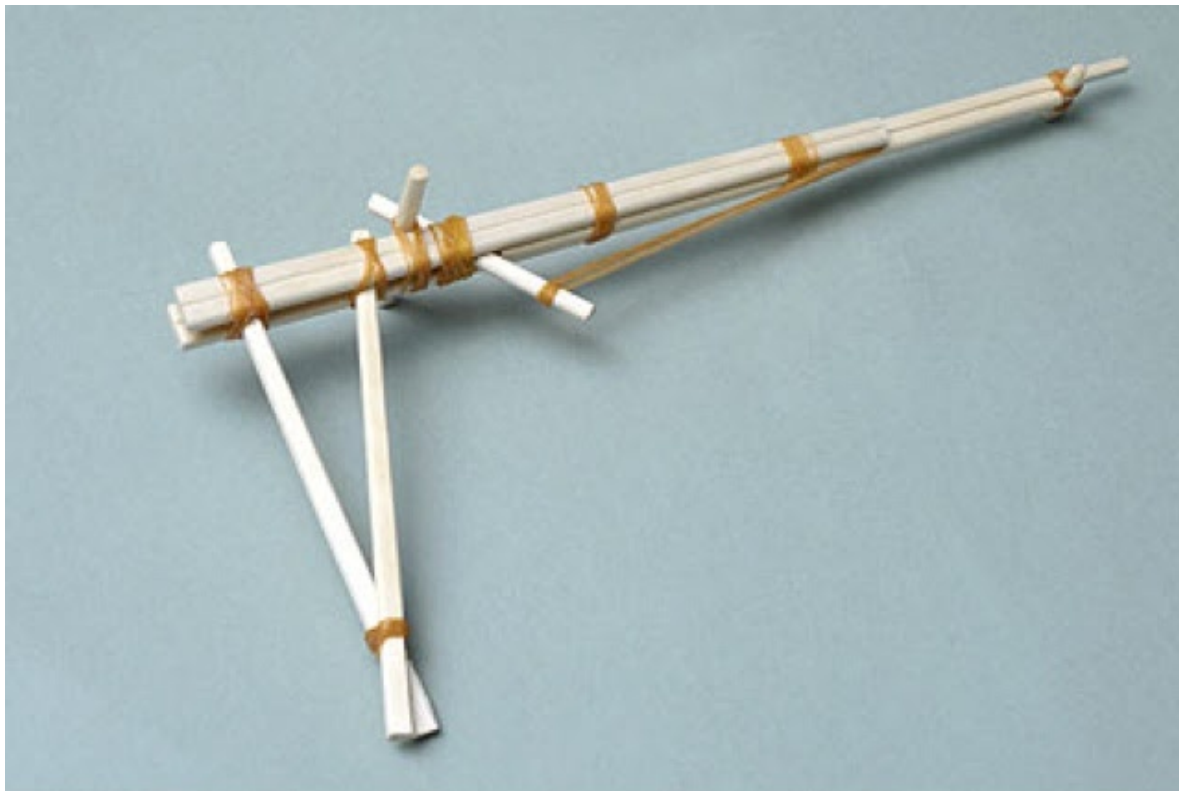

竹槍

- 非常不同意
- 不同意
- 有點不同意
- 普通
- 有點同意
- 同意
- 非常同意

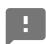



16. 對於這張圖片有熟悉感。 \*

红动中国WWW.REDOCN.COM

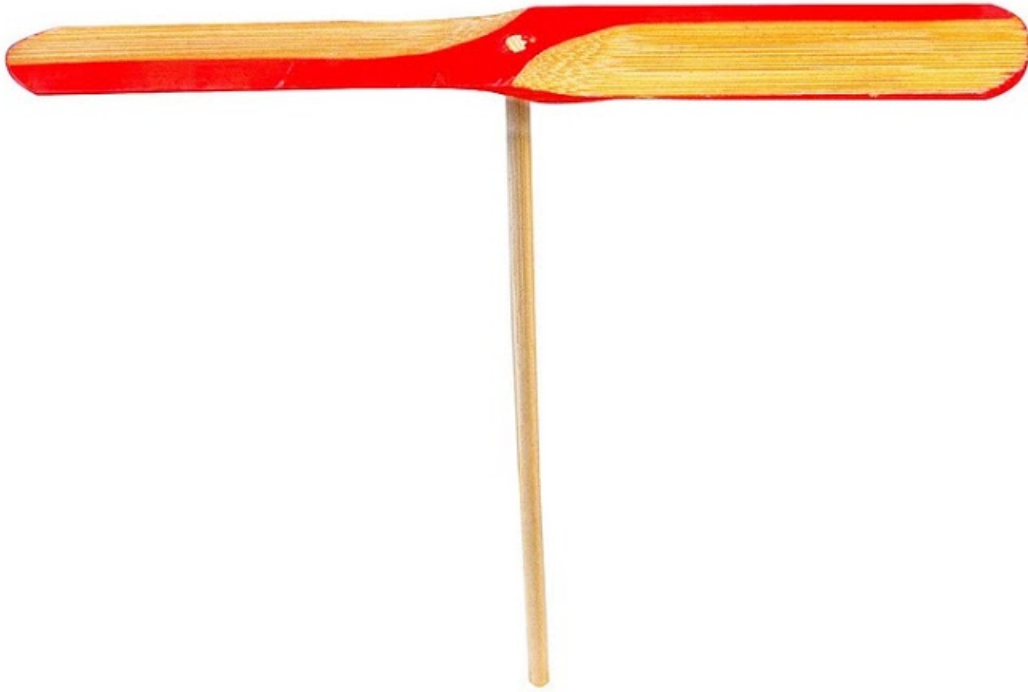

编号 : 753063 红动中国 (www.redocn.com) opear

竹蜻蜓

- 非常不同意
- 不同意
- 有點不同意
- 普通
- 有點同意
- 同意
- 非常同意



17. 對於這張圖片有熟悉感。 \*

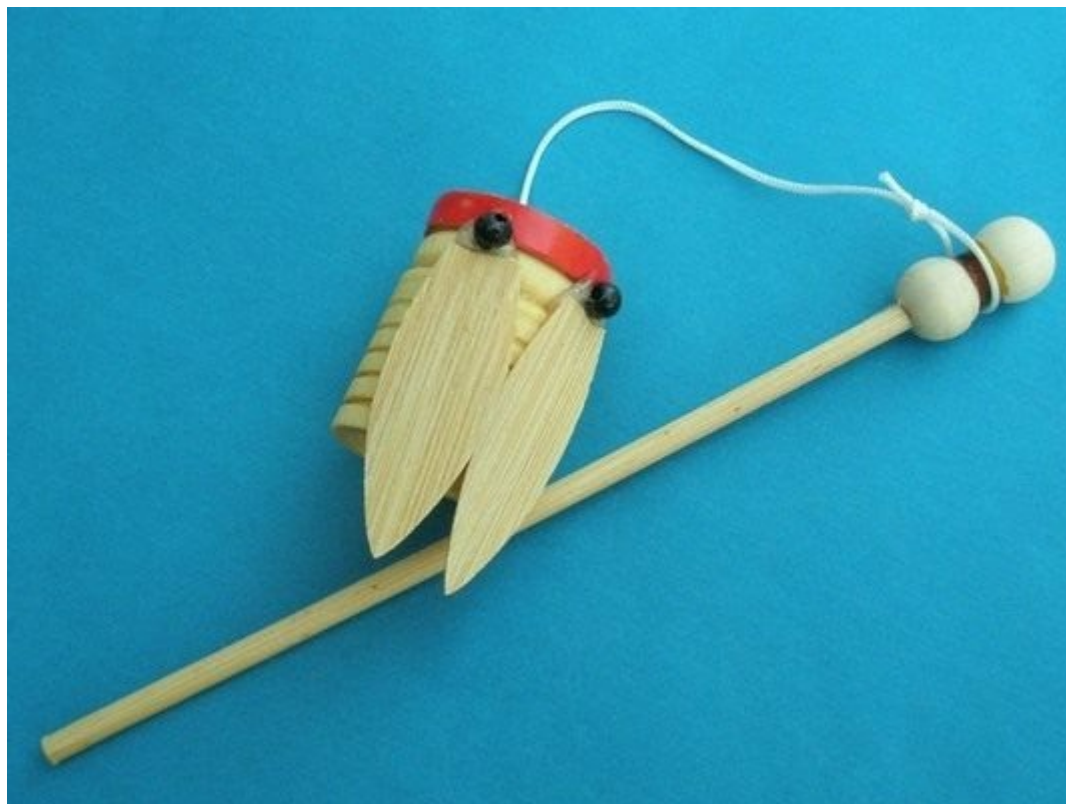

竹蟬

- 非常不同意
- 不同意
- 有點不同意
- 普通
- 有點同意
- 同意
- 非常同意



18. 對於這張圖片有熟悉感。 \*

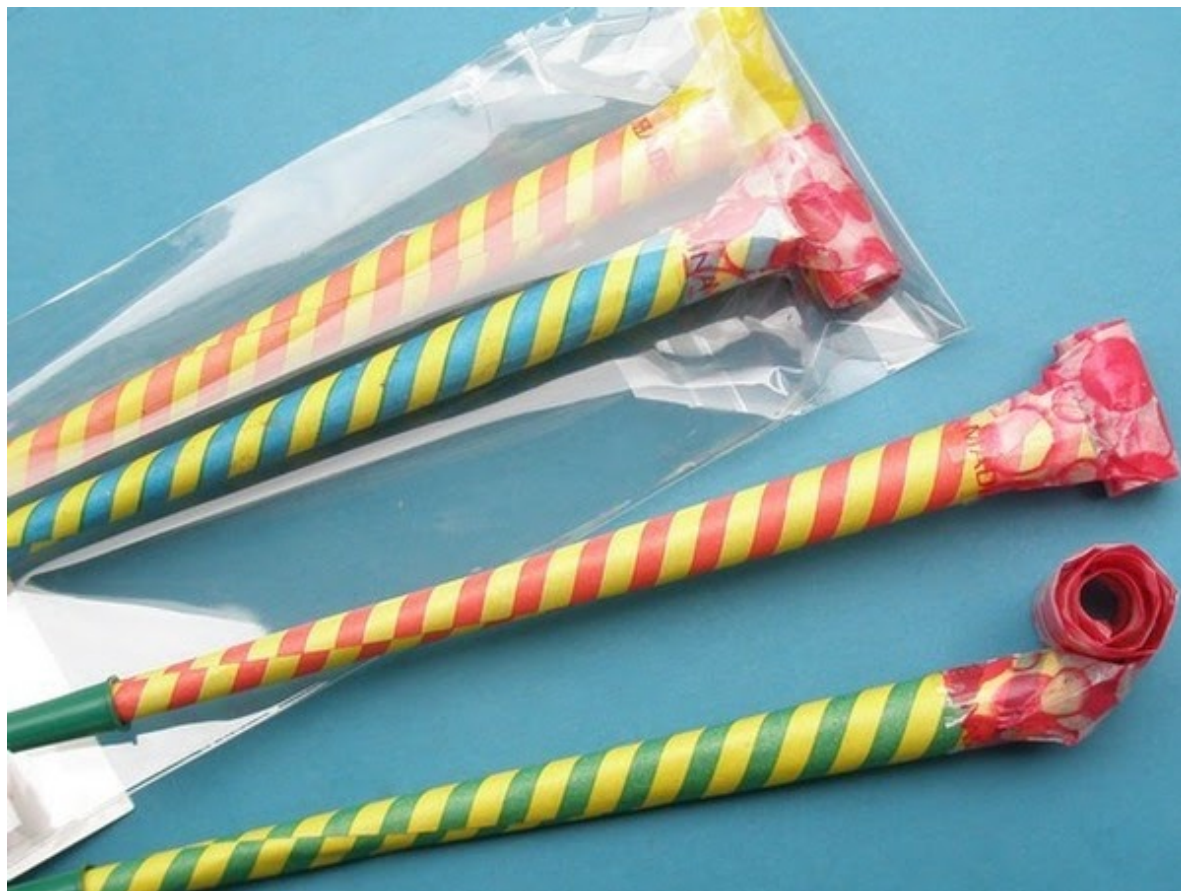

伸縮象鼻

- 非常不同意
- 不同意
- 有點不同意
- 普通
- 有點同意
- 同意
- 非常同意

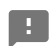

19. 對於這張圖片有熟悉感。 \*

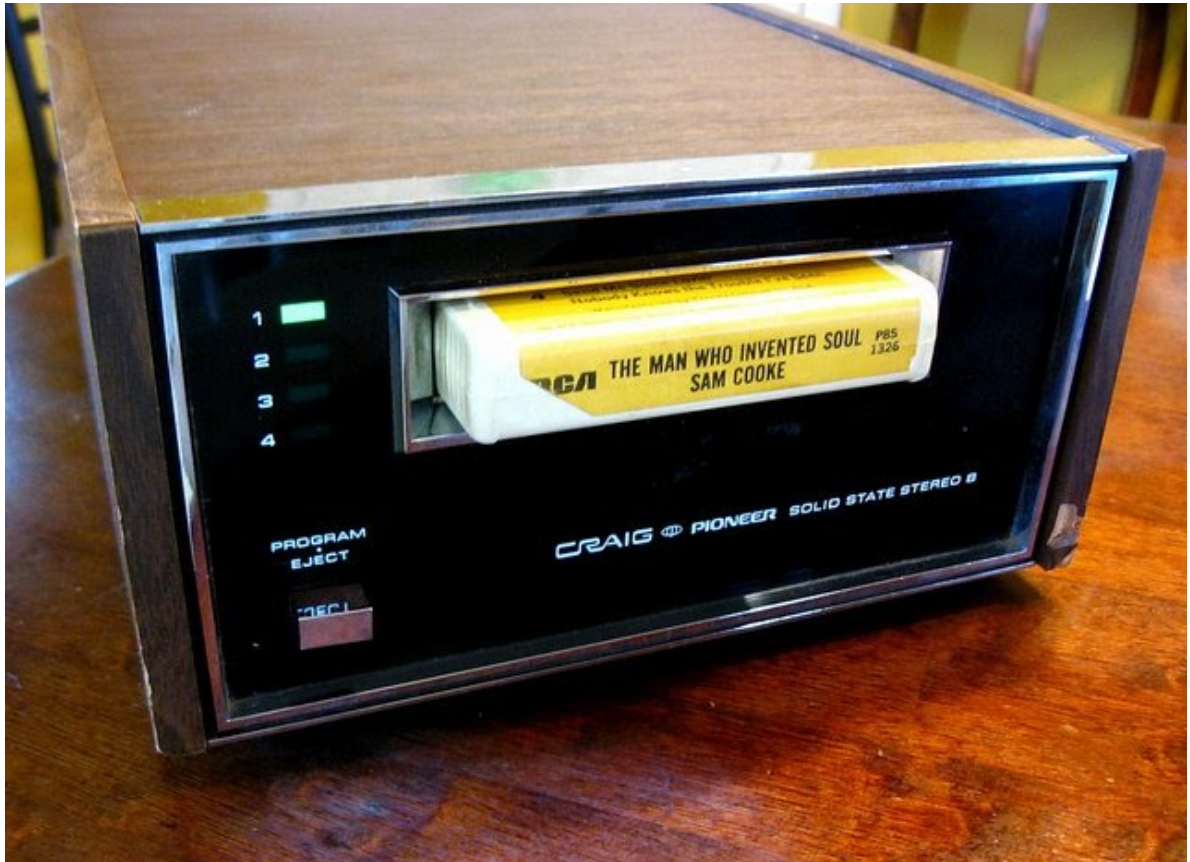

匣式錄音帶

- 非常不同意
- 不同意
- 有點不同意
- 普通
- 有點同意
- 同意
- 非常同意





20. 對於這張圖片有熟悉感。 \*

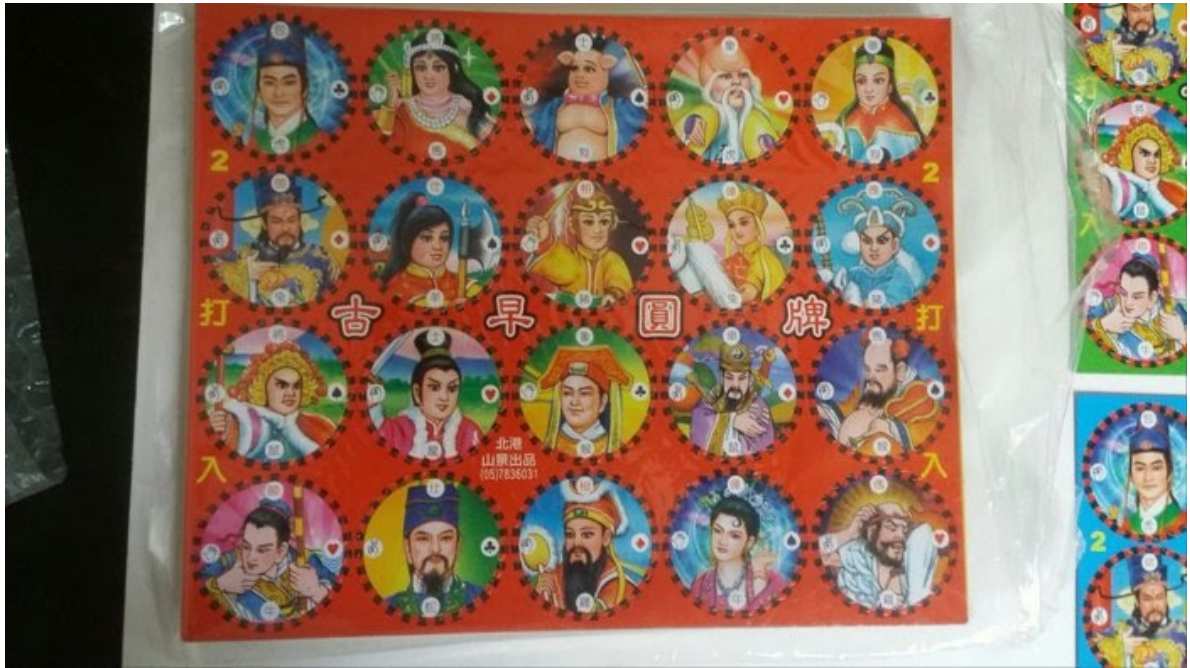

尪仔標

- 非常不同意
- 不同意
- 有點不同意
- 普通
- 有點同意
- 同意
- 非常同意



21. 對於這張圖片有熟悉感。 \*

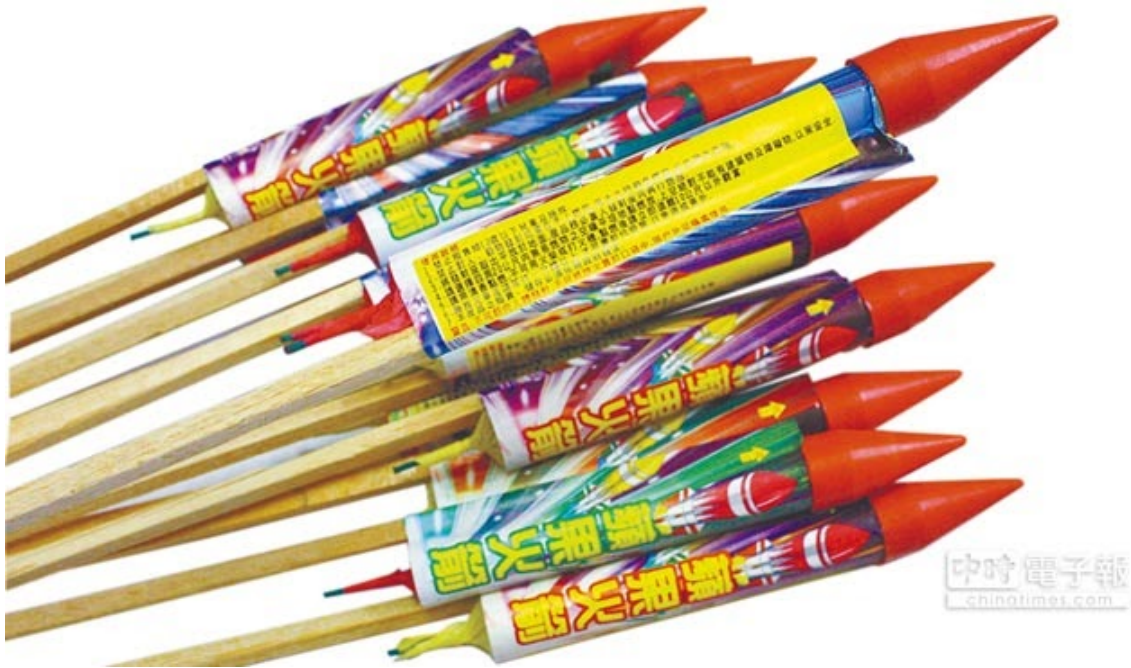

冲天炮

- 非常不同意
- 不同意
- 有點不同意
- 普通
- 有點同意
- 同意
- 非常同意

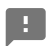

22. 對於這張圖片有熟悉感。 \*

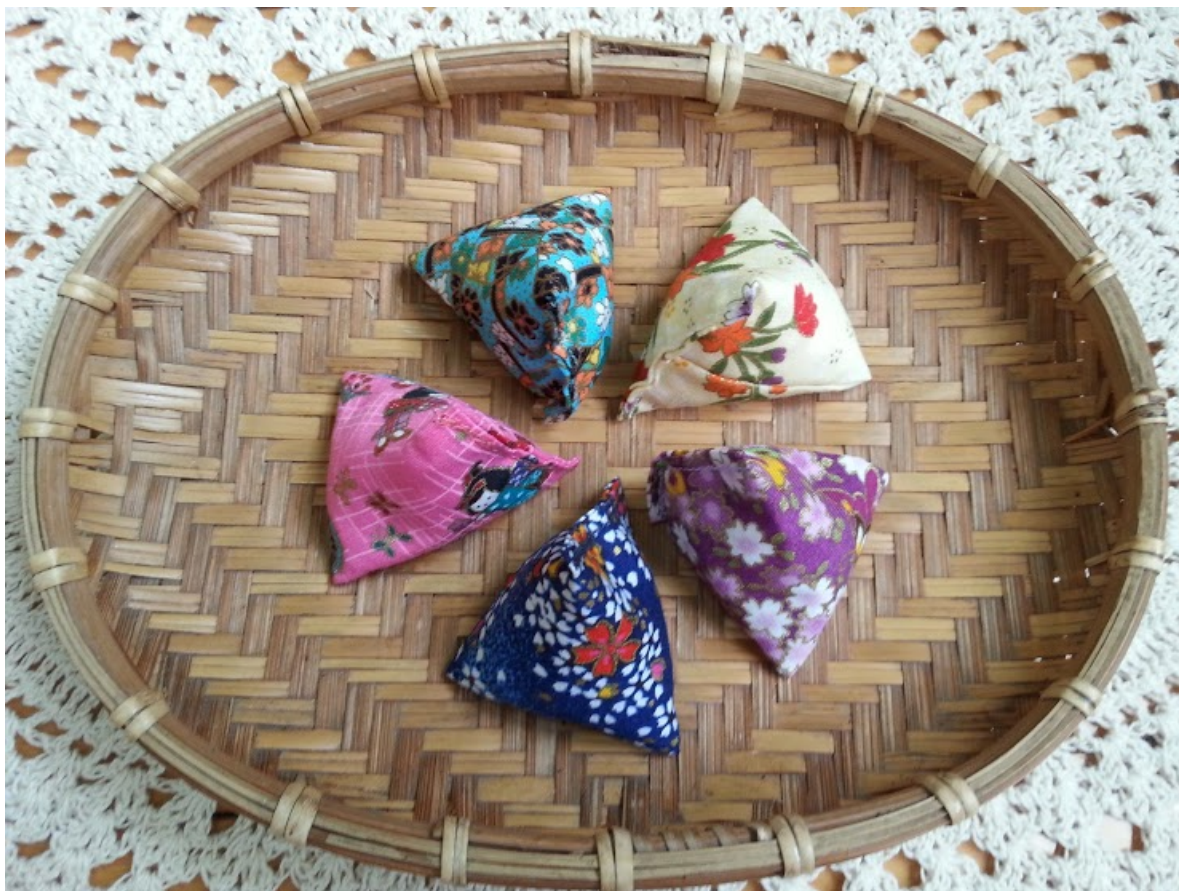

沙包

- 非常不同意
- 不同意
- 有點不同意
- 普通
- 有點同意
- 同意
- 非常同意

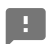



23. 對於這張圖片有熟悉感。 \*

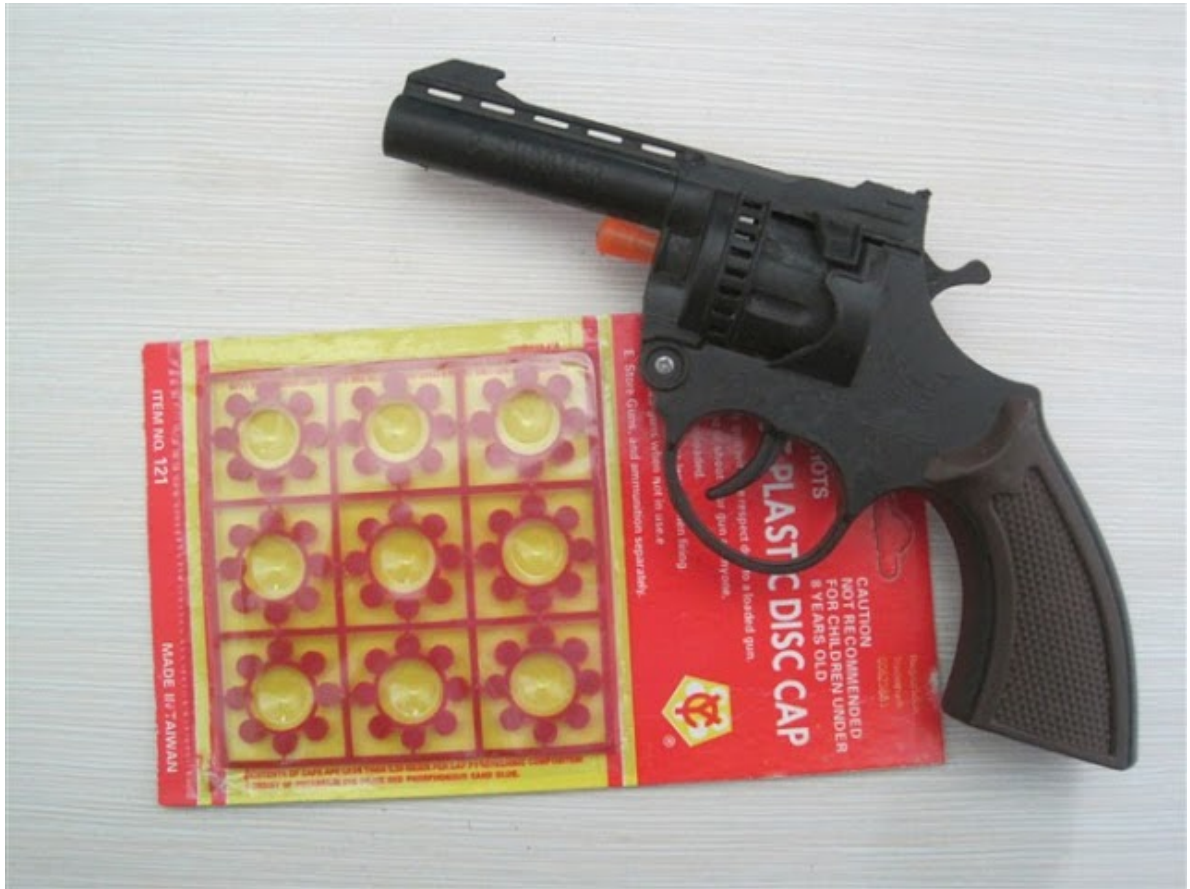

玩具左輪手槍

- 非常不同意
- 不同意
- 有點不同意
- 普通
- 有點同意
- 同意
- 非常同意

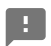



24. 對於這張圖片有熟悉感。 \*

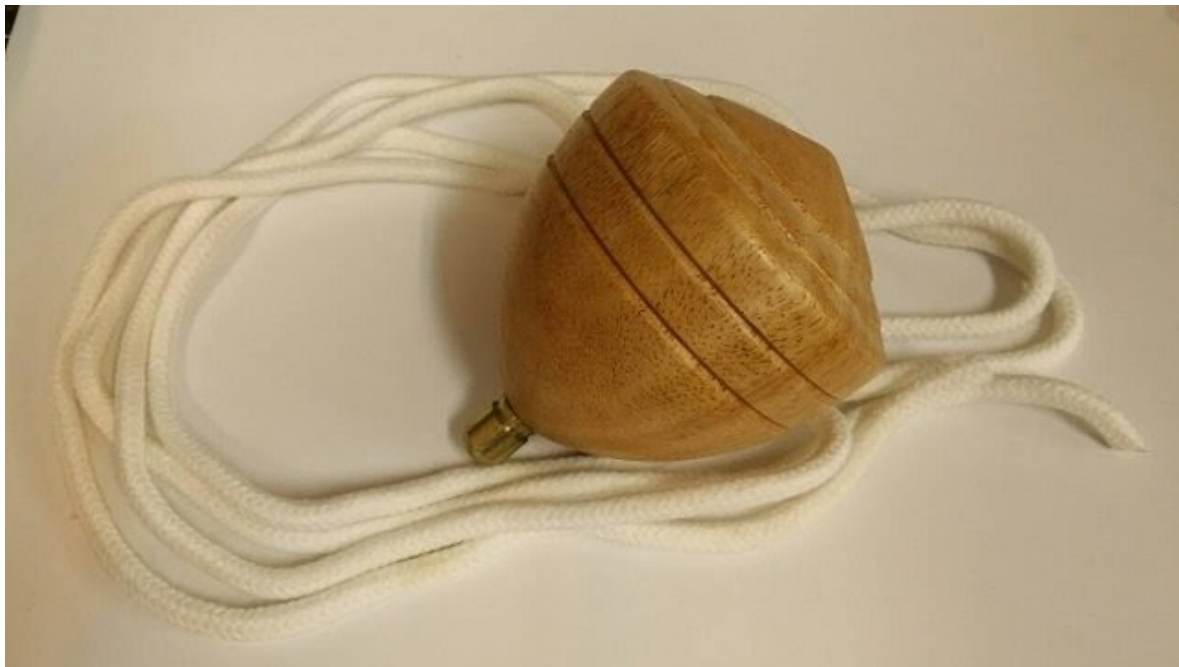

陀螺

- 非常不同意
- 不同意
- 有點不同意
- 普通
- 有點同意
- 同意
- 非常同意

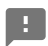

25. 對於這張圖片有熟悉感。 \*

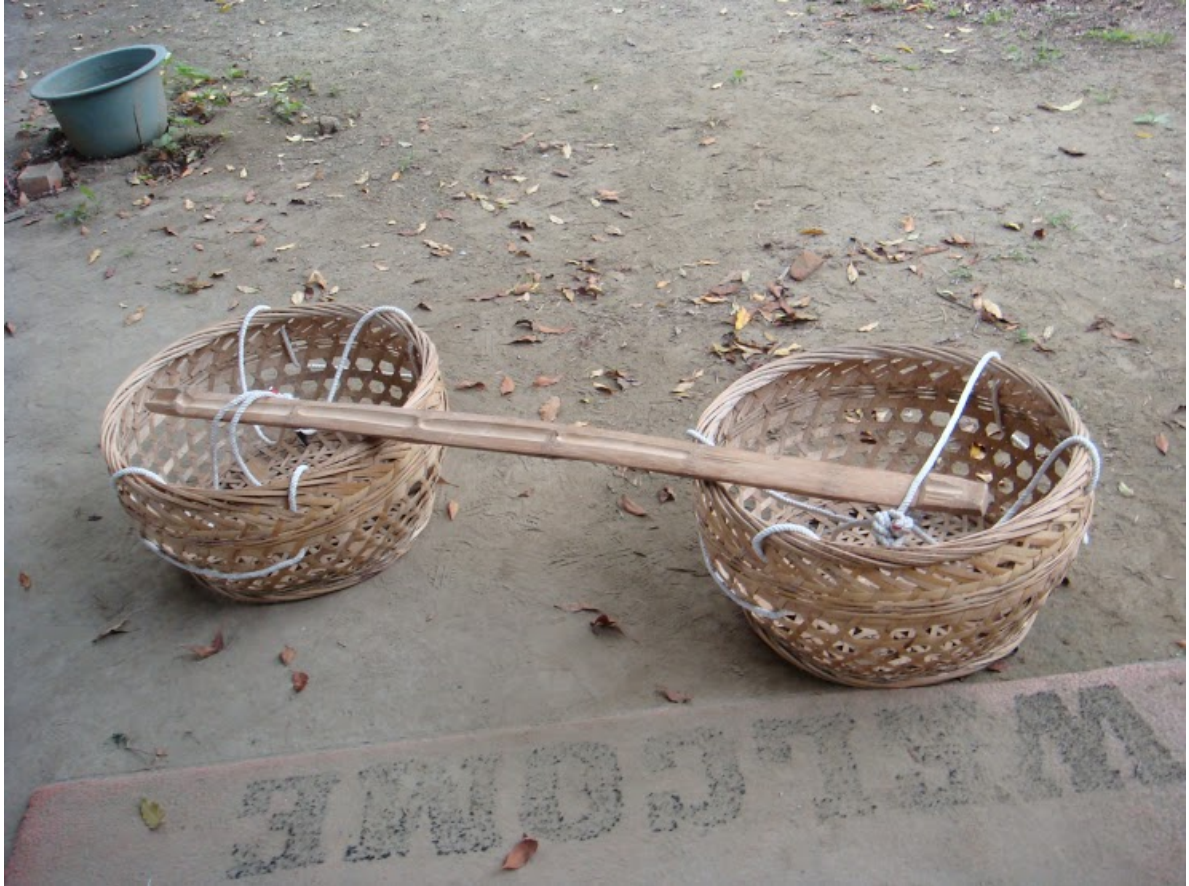

扁擔

- 非常不同意
- 不同意
- 有點不同意
- 普通
- 有點同意
- 同意
- 非常同意

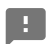

26. 對於這張圖片有熟悉感。 \*

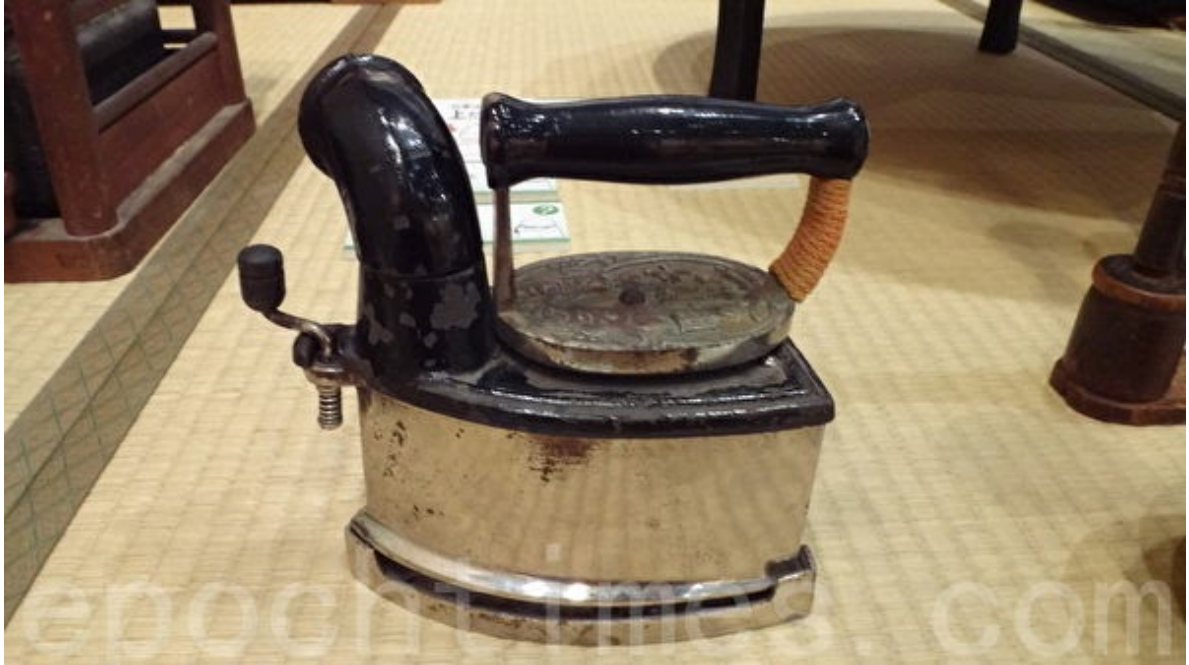

炭火熨斗

- 非常不同意
- 不同意
- 有點不同意
- 普通
- 有點同意
- 同意
- 非常同意



27. 對於這張圖片有熟悉感。 \*

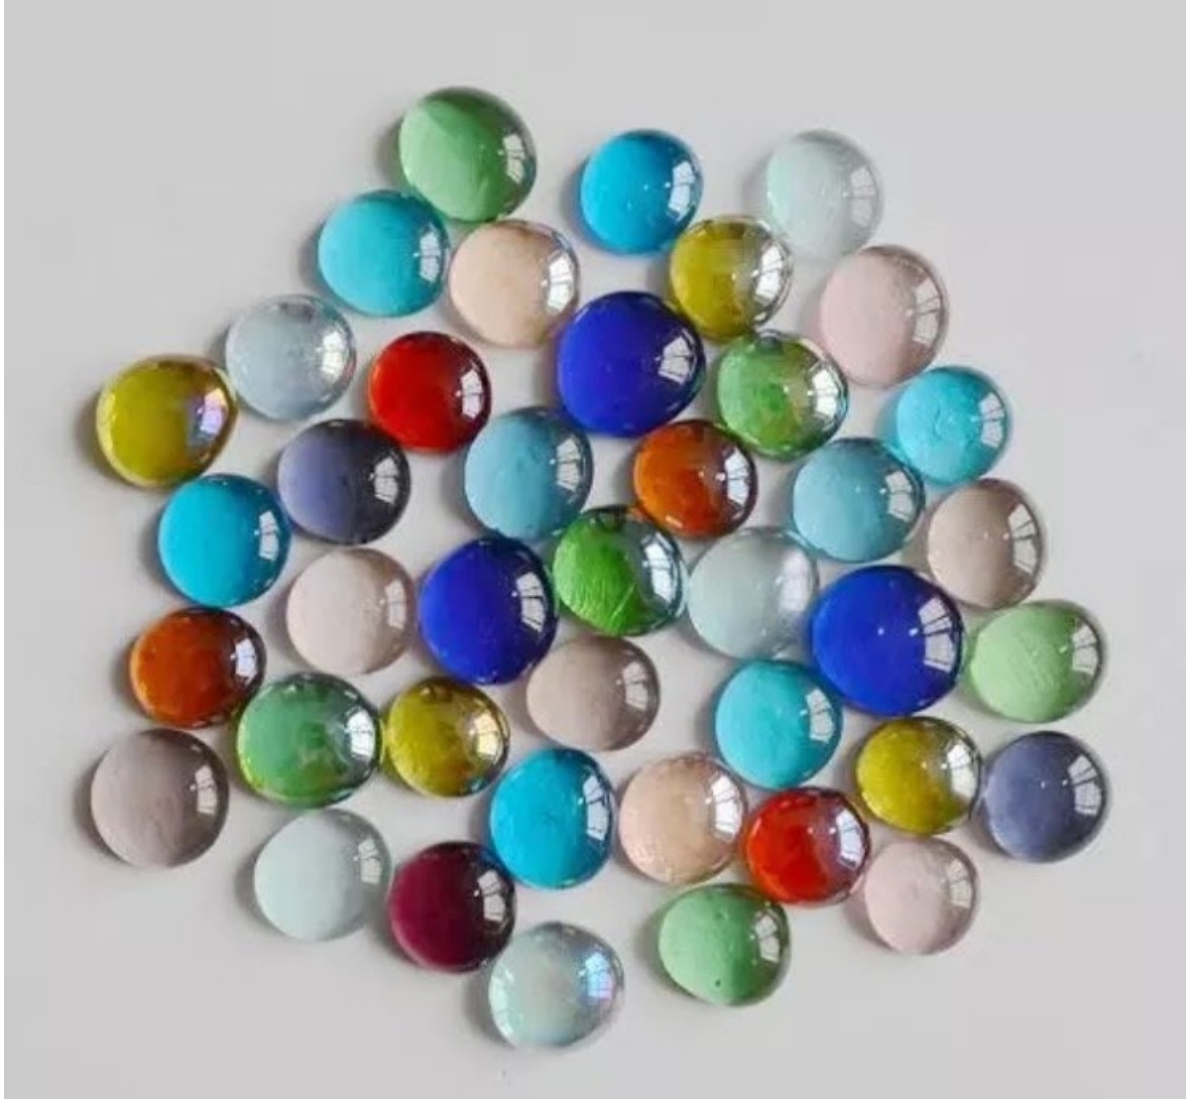

玻璃珠

- 非常不同意
- 不同意
- 有點不同意
- 普通
- 有點同意
- 同意
- 非常同意





28. 對於這張圖片有熟悉感。 \*

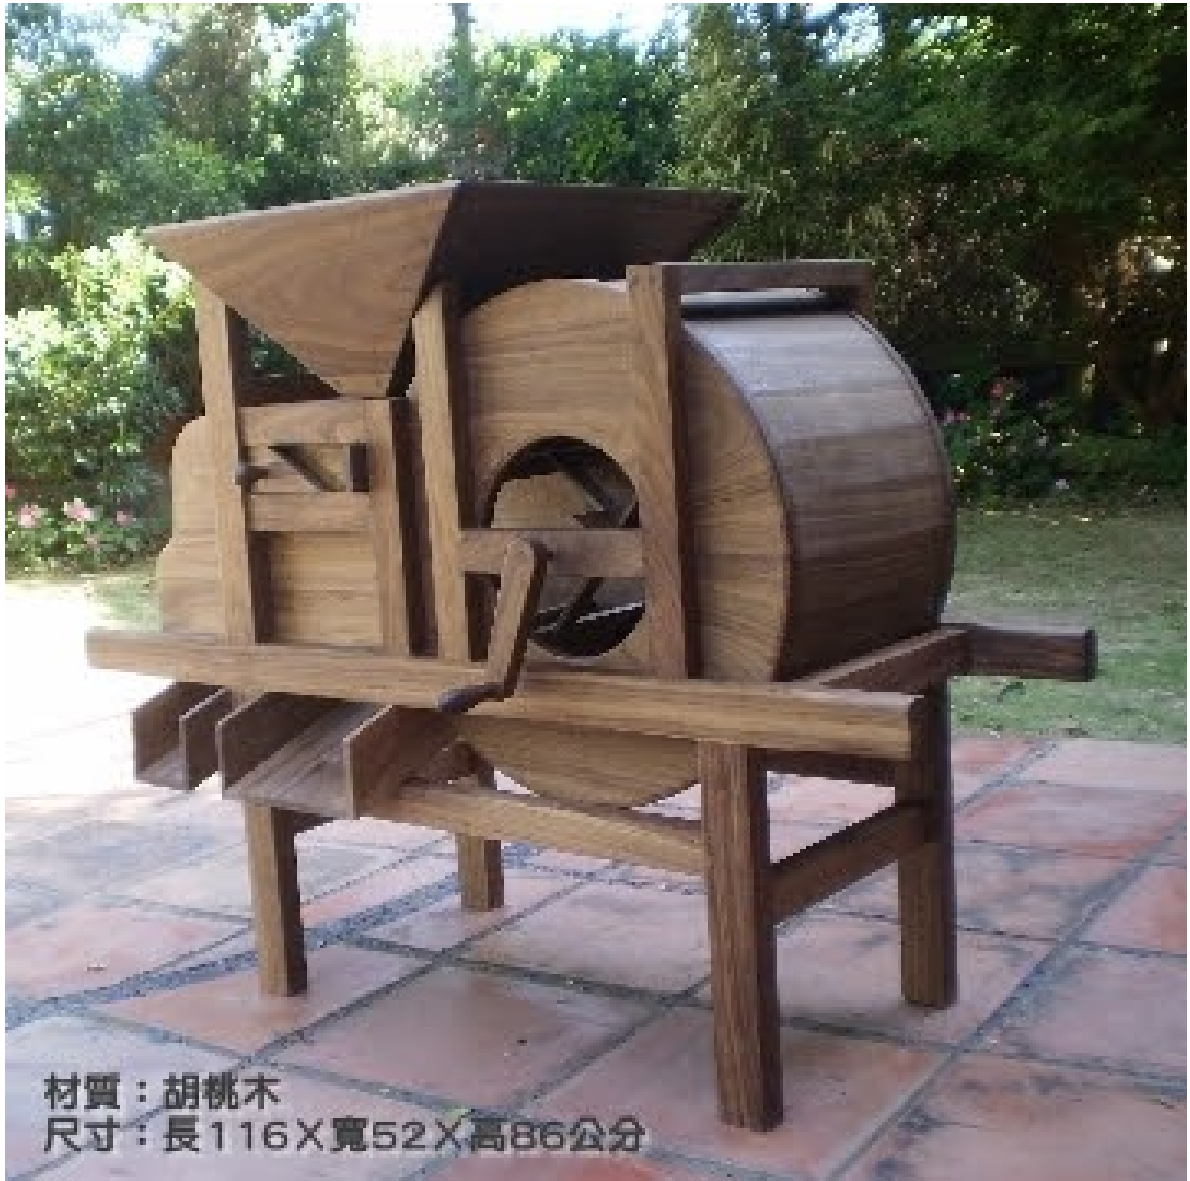

風鼓機

- 非常不同意
- 不同意
- 有點不同意
- 普通
- 有點同意
- 同意
- 非常同意



29. 對於這張圖片有熟悉感。 \*

昵图网 nipic.com/

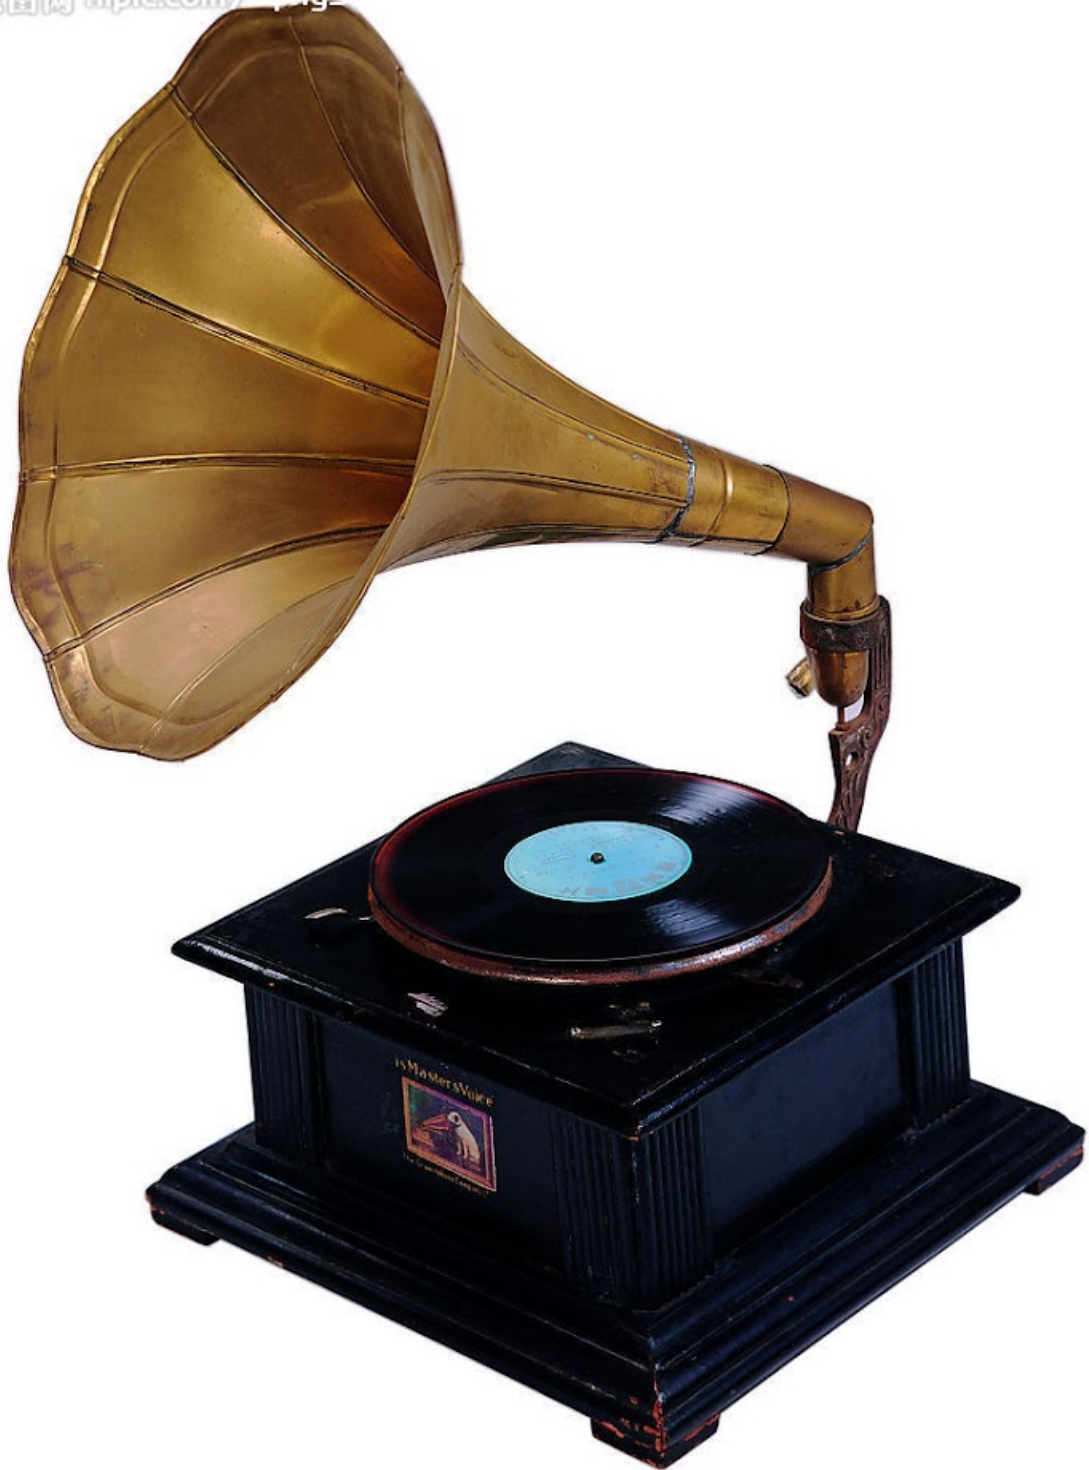

留聲機

- 非常不同意
- 不同意
- 有點不同意
- 普通



- 有點同意
- 同意
- 非常同意

30. 對於這張圖片有熟悉感。 \*

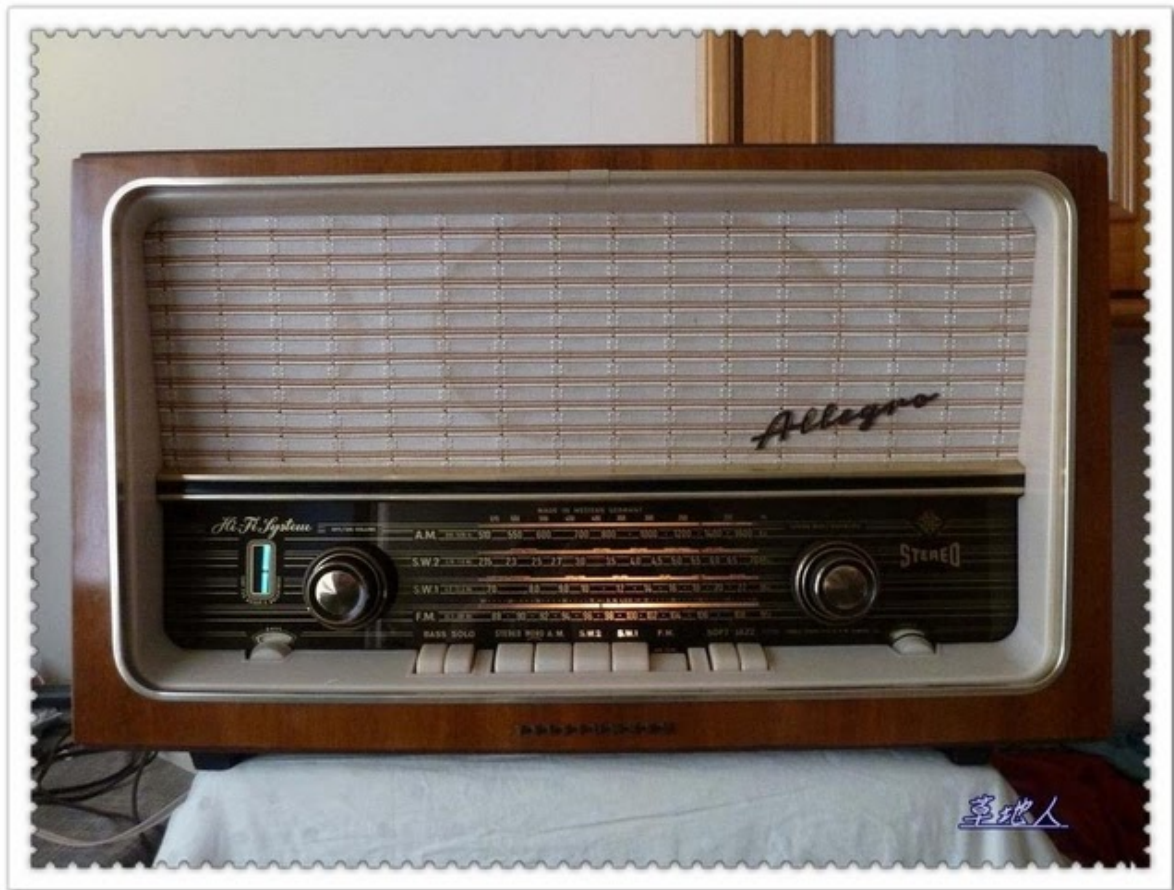

真空管收音機

- 非常不同意
- 不同意
- 有點不同意
- 普通
- 有點同意
- 同意
- 非常同意



31. 對於這張圖片有熟悉感。 \*

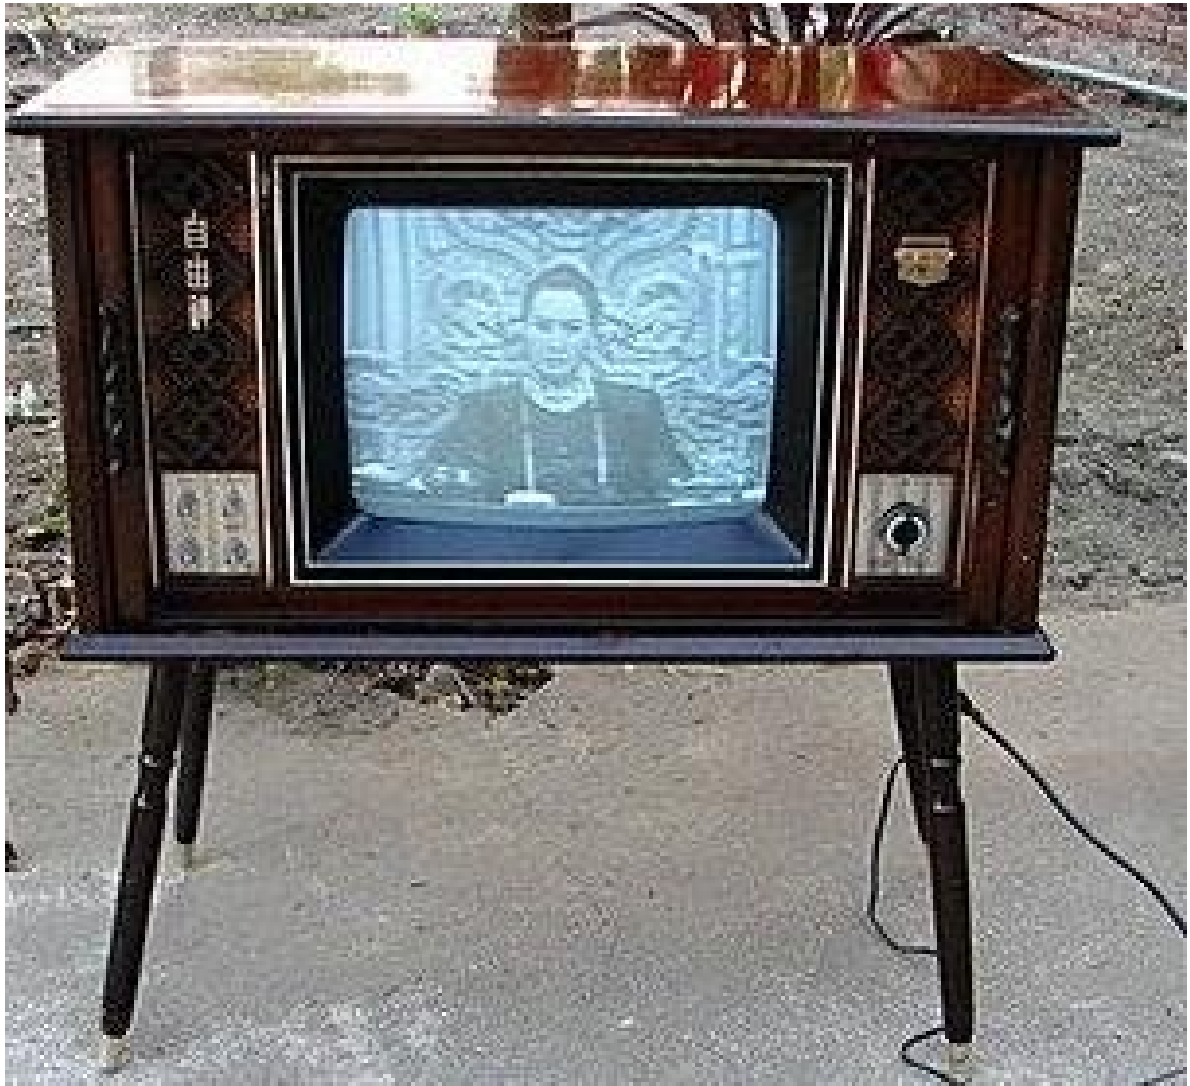

真空管電視

- 非常不同意
- 不同意
- 有點不同意
- 普通
- 有點同意
- 同意
- 非常同意





32. 對於這張圖片有熟悉感。 \*

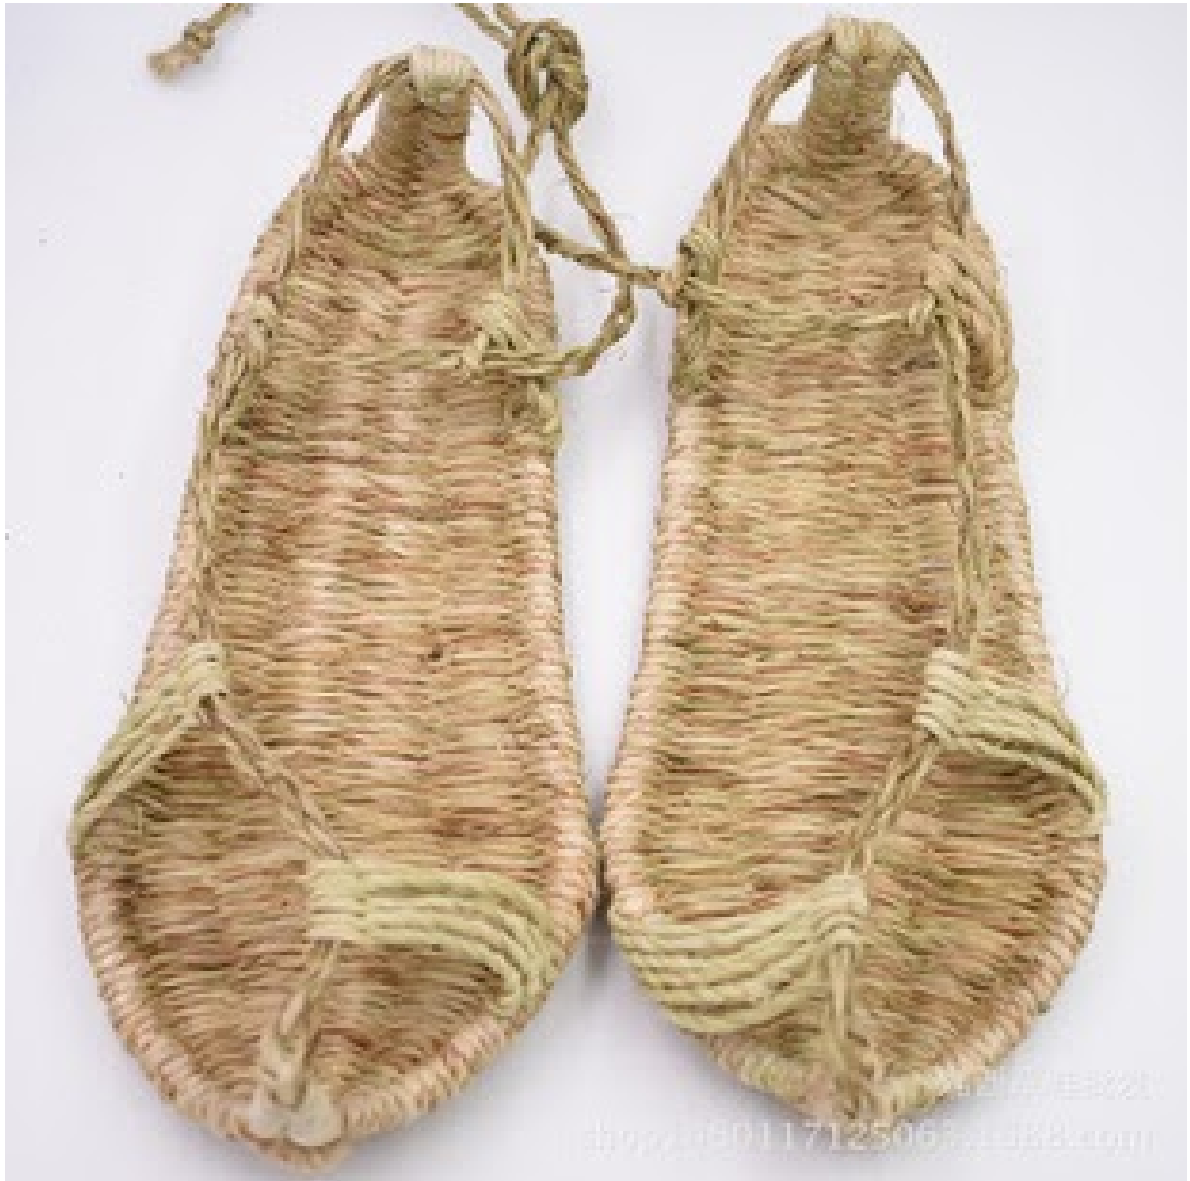

草鞋

- 非常不同意
- 不同意
- 有點不同意
- 普通
- 有點同意
- 同意
- 非常同意



33. 對於這張圖片有熟悉感。 \*

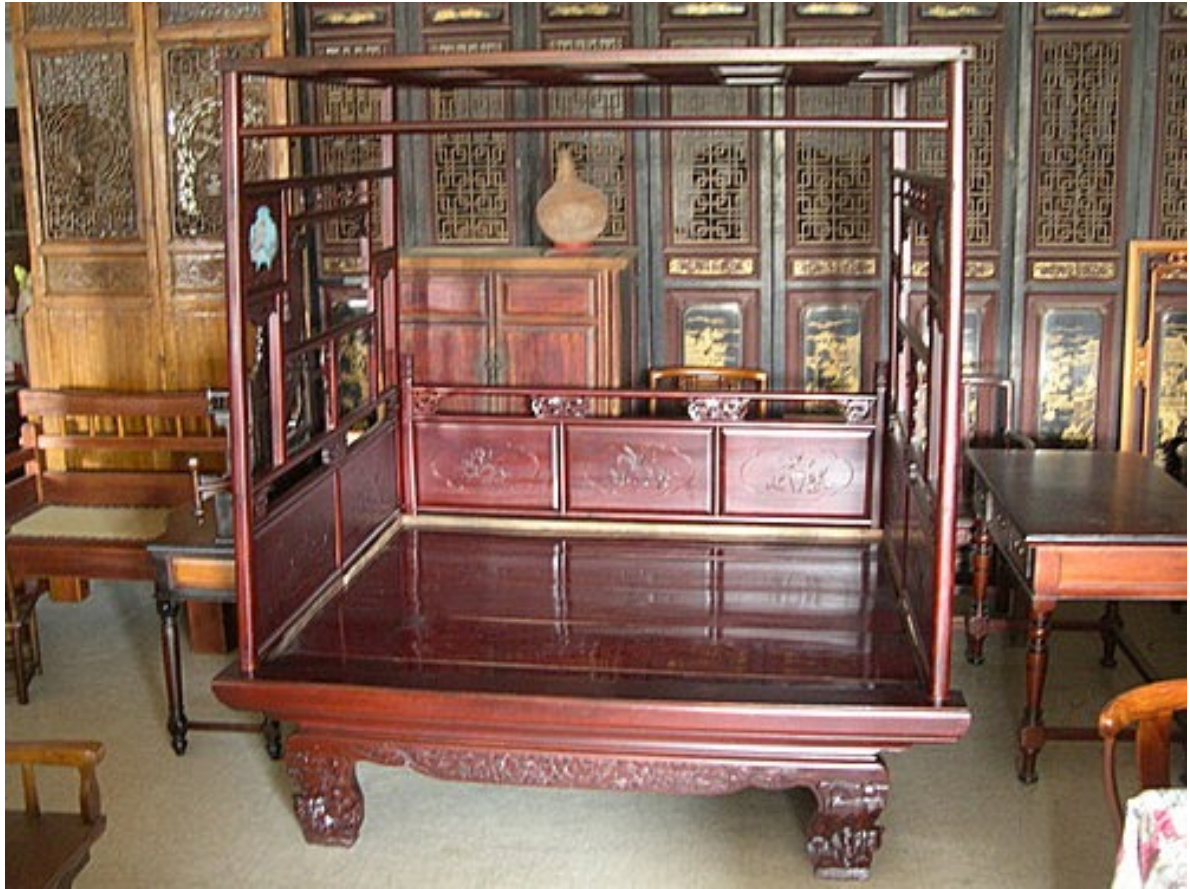

高架床

- 非常不同意
- 不同意
- 有點不同意
- 普通
- 有點同意
- 同意
- 非常同意

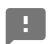

34. 對於這張圖片有熟悉感。 \*

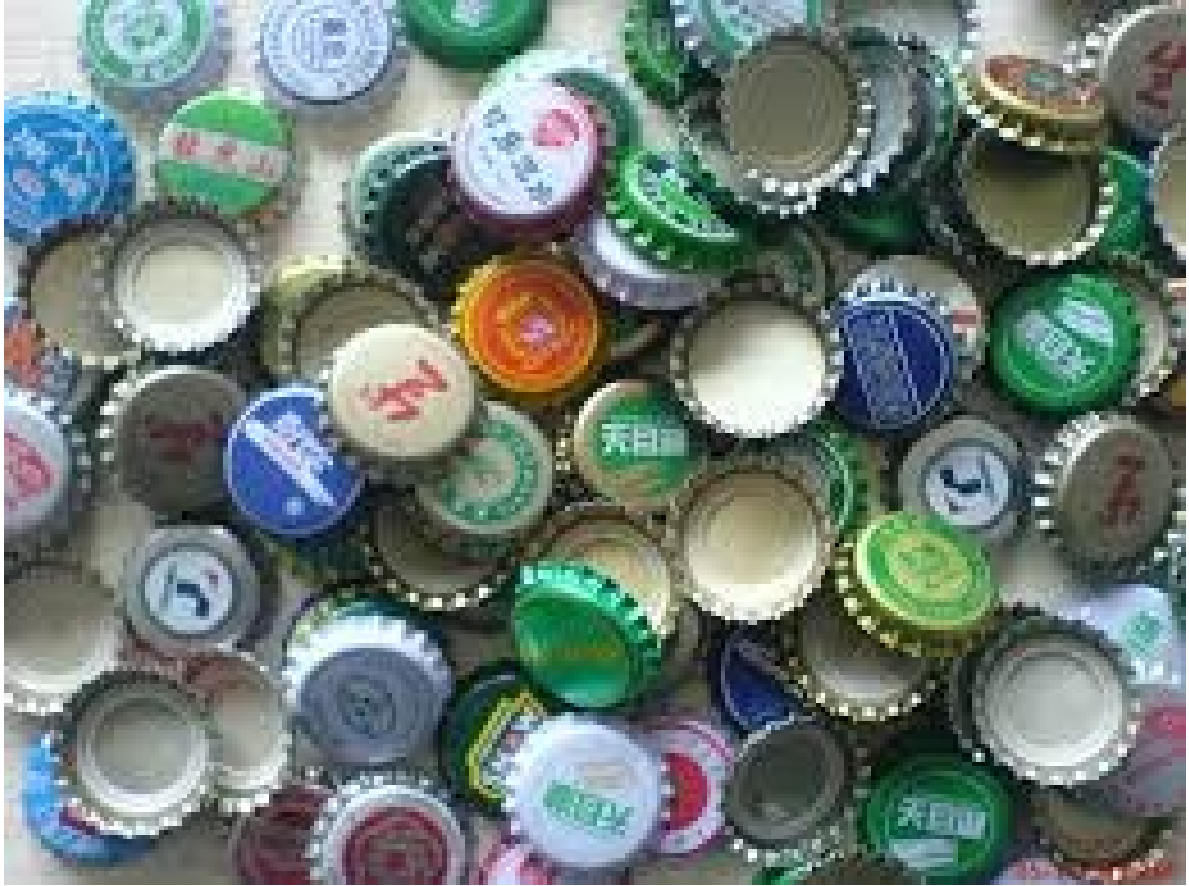

瓶蓋

- 非常不同意
- 不同意
- 有點不同意
- 普通
- 有點同意
- 同意
- 非常同意



35. 對於這張圖片有熟悉感。 \*

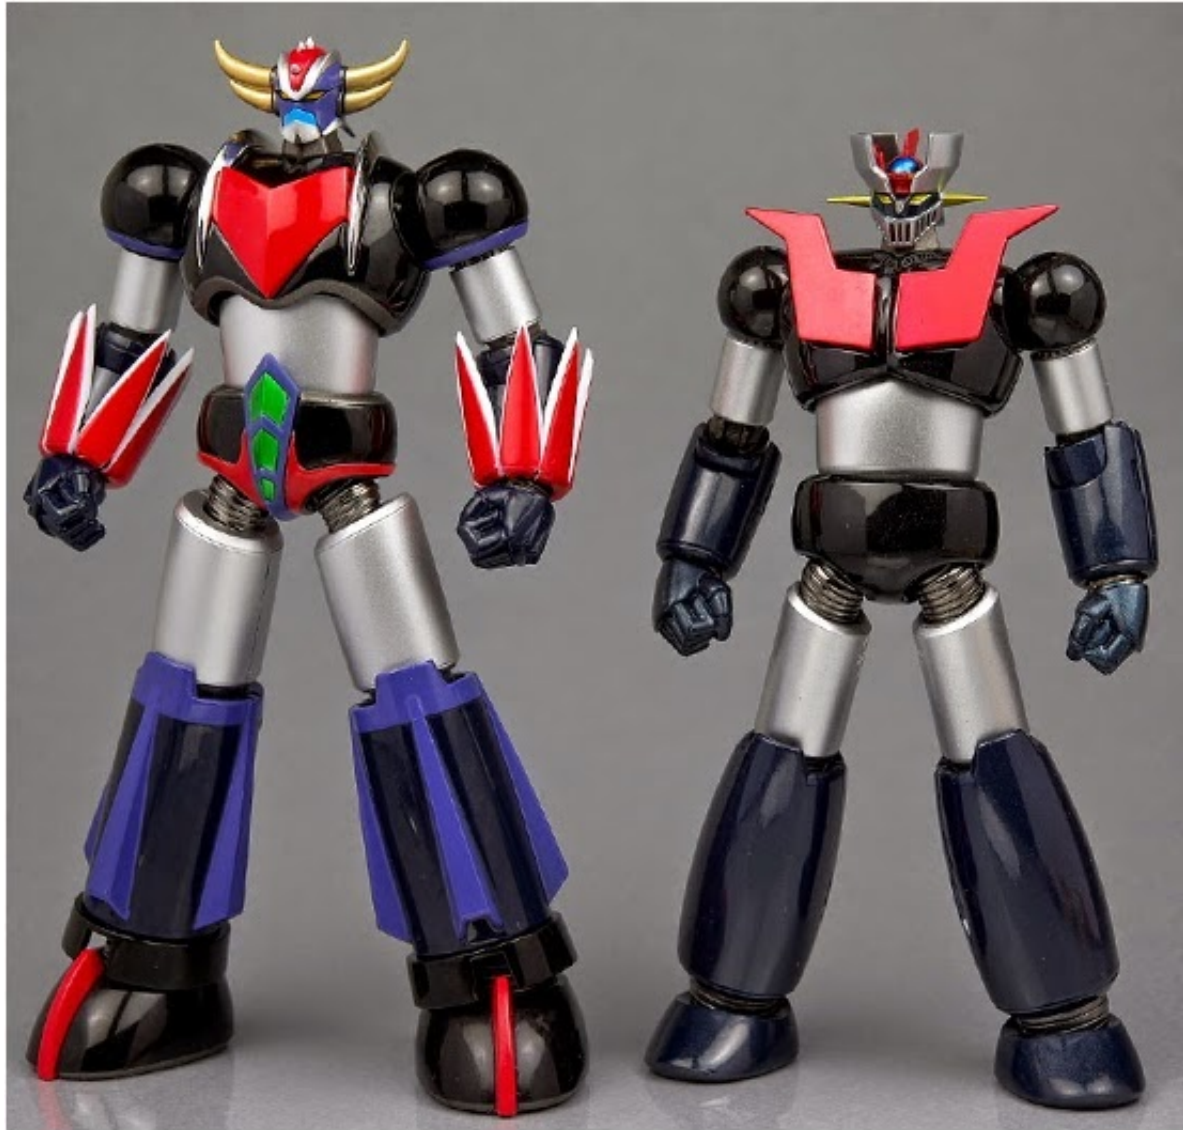

無敵鐵金剛

- 非常不同意
- 不同意
- 有點不同意
- 普通
- 有點同意
- 同意
- 非常同意





36. 對於這張圖片有熟悉感。 \*

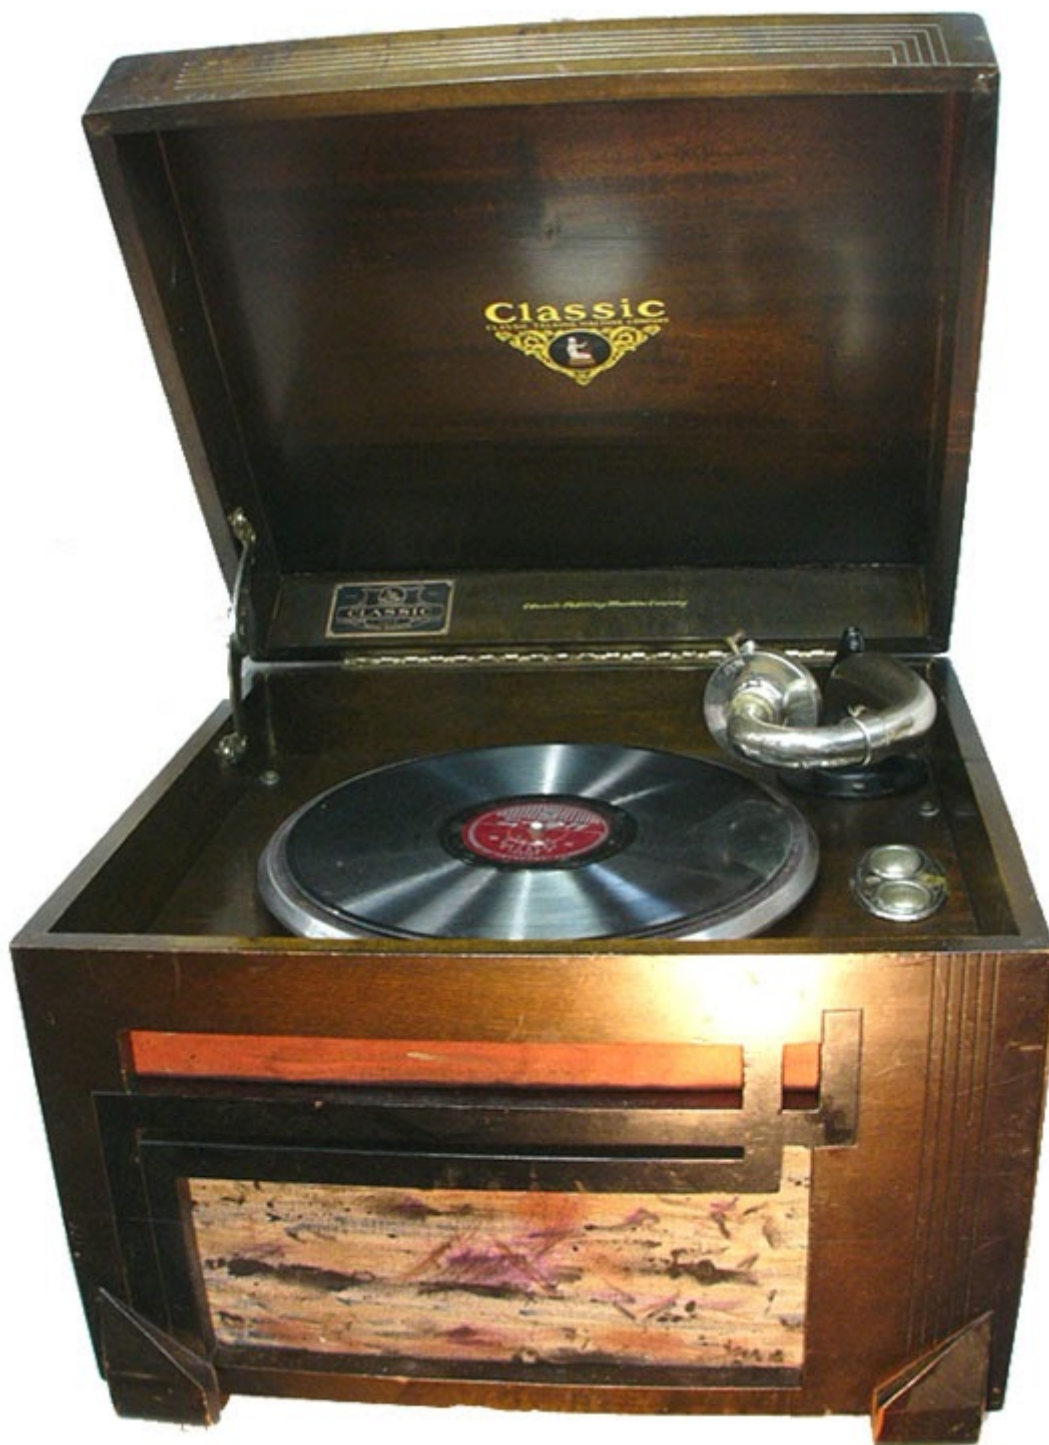

發條留聲機

- 非常不同意
- 不同意
- 有點不同意
- 普通
- 有點同意

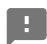

- 同意
- 非常同意

37. 對於這張圖片有熟悉感。 \*

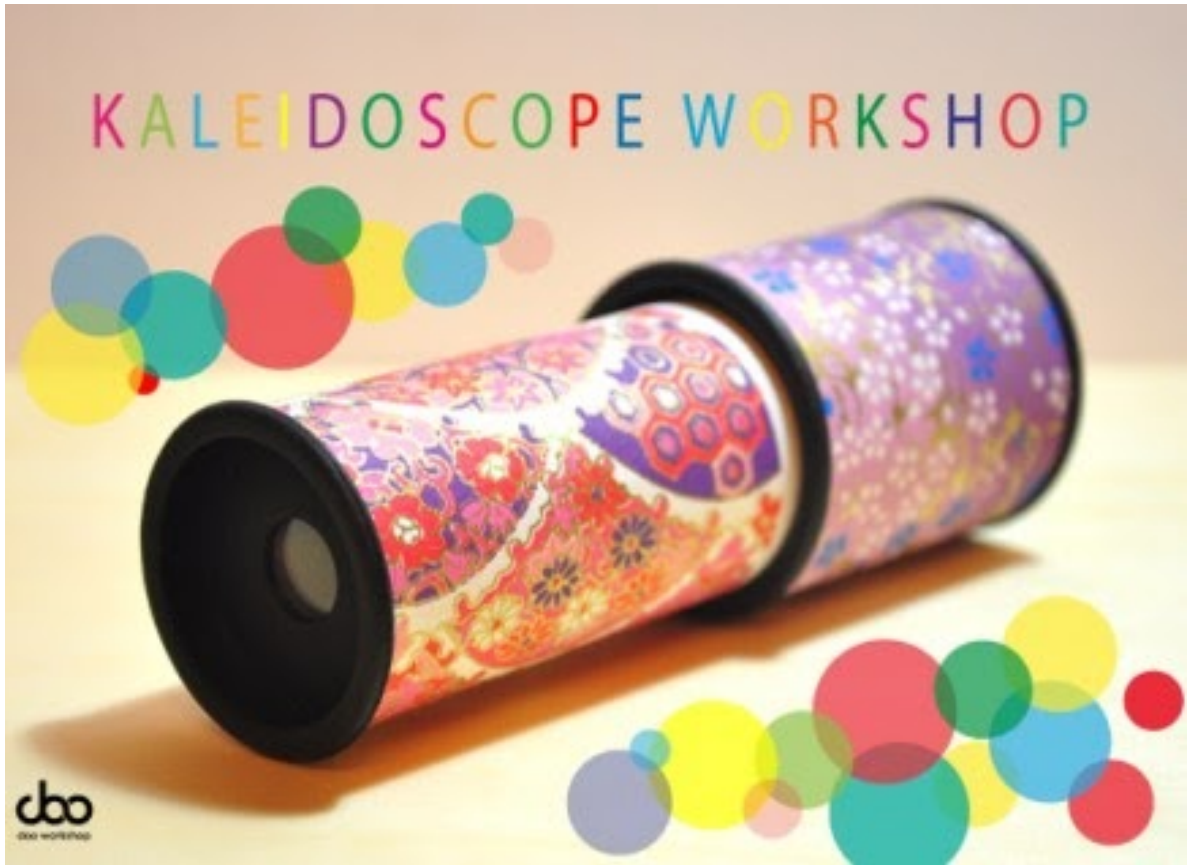

萬花筒

- 非常不同意
- 不同意
- 有點不同意
- 普通
- 有點同意
- 同意
- 非常同意



38. 對於這張圖片有熟悉感。 \*

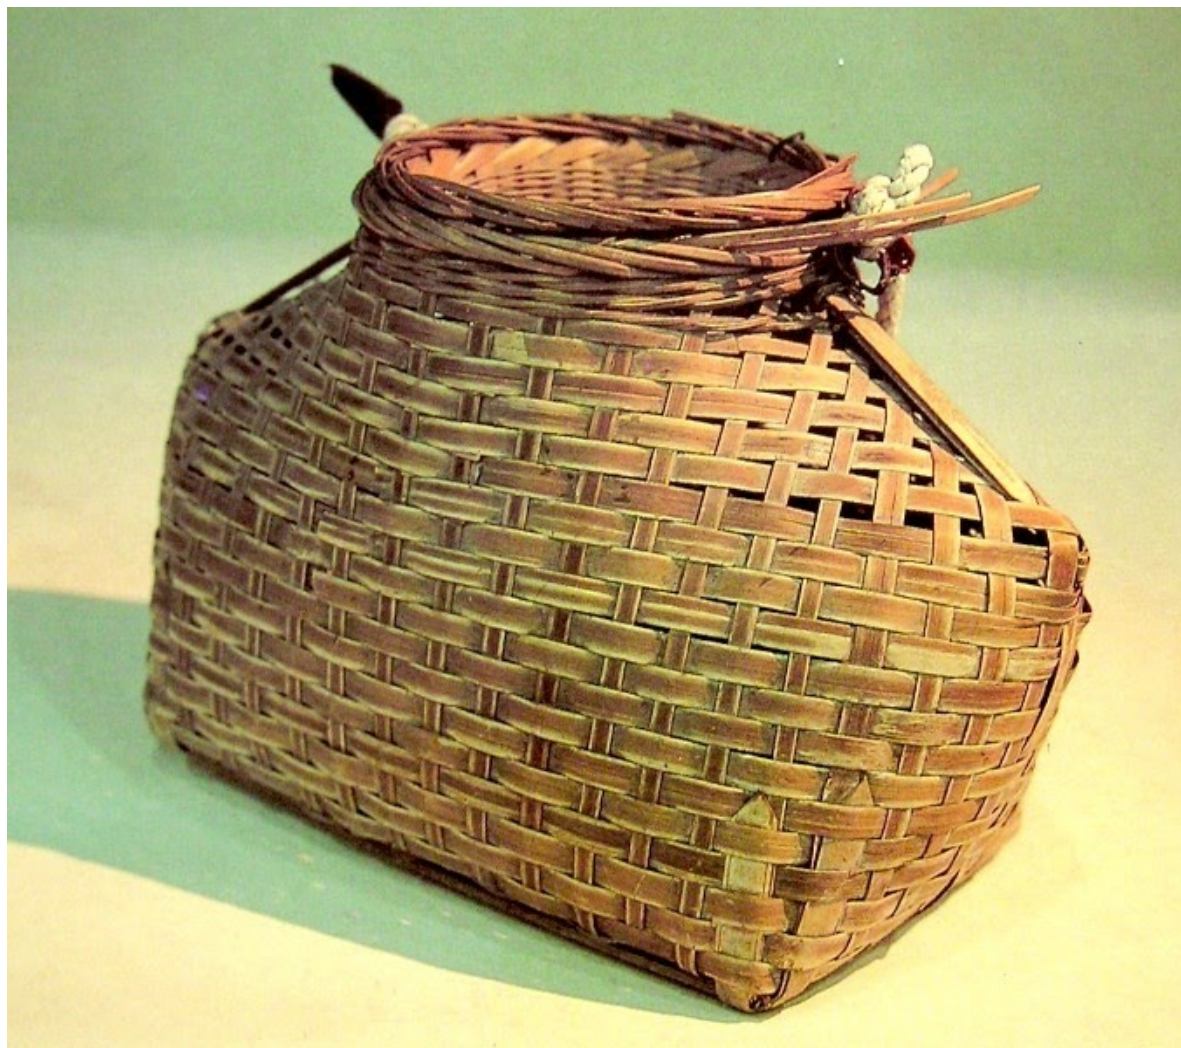

補魚籃

- 非常不同意
- 不同意
- 有點不同意
- 普通
- 有點同意
- 同意
- 非常同意

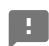



39. 對於這張圖片有熟悉感。 \*

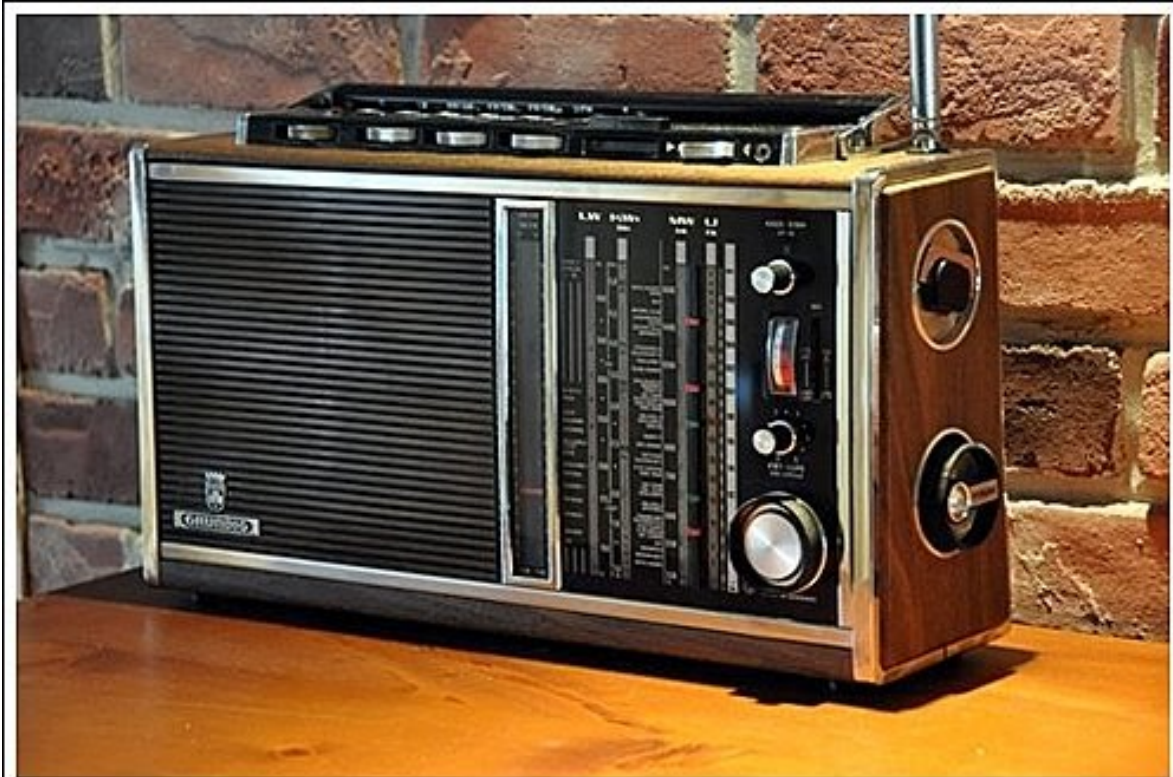

*GRUNDIG SATELLIT 210-Transistor 6001*

電晶體收音機

- 非常不同意
- 不同意
- 有點不同意
- 普通
- 有點同意
- 同意
- 非常同意





40. 對於這張圖片有熟悉感。 \*

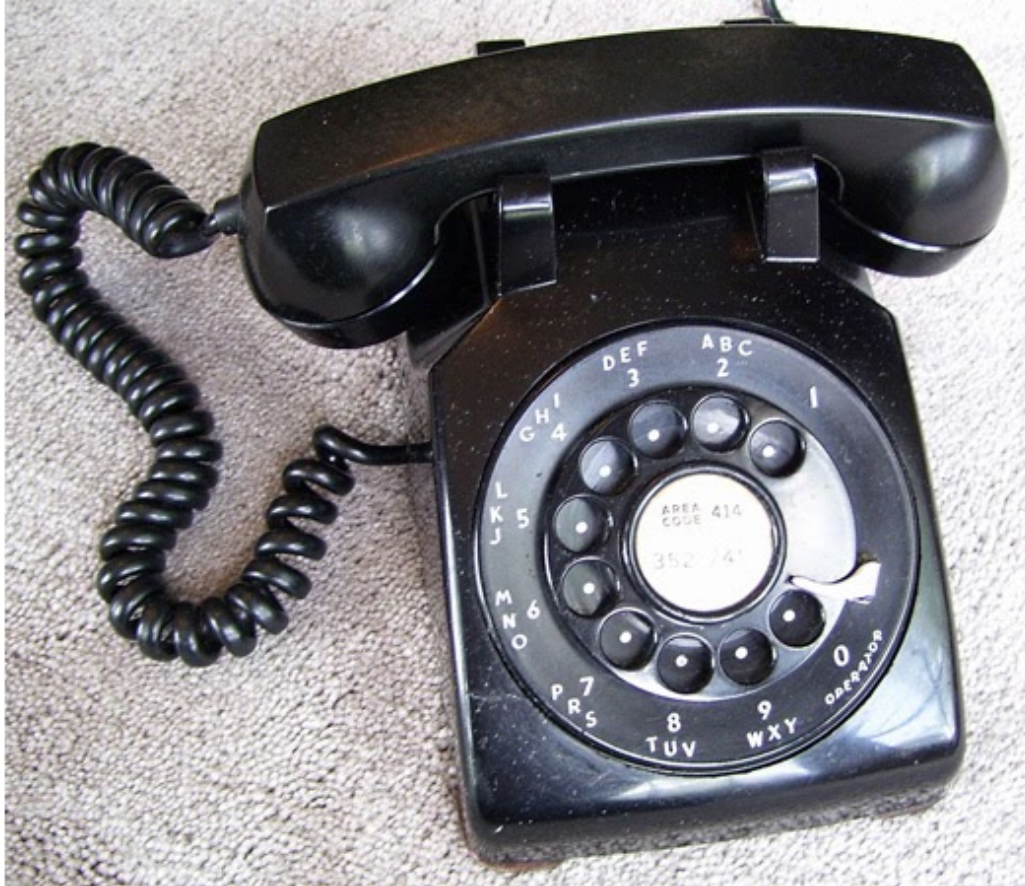

電話

- 非常不同意
- 不同意
- 有點不同意
- 普通
- 有點同意
- 同意
- 非常同意



41. 對於這張圖片有熟悉感。 \*

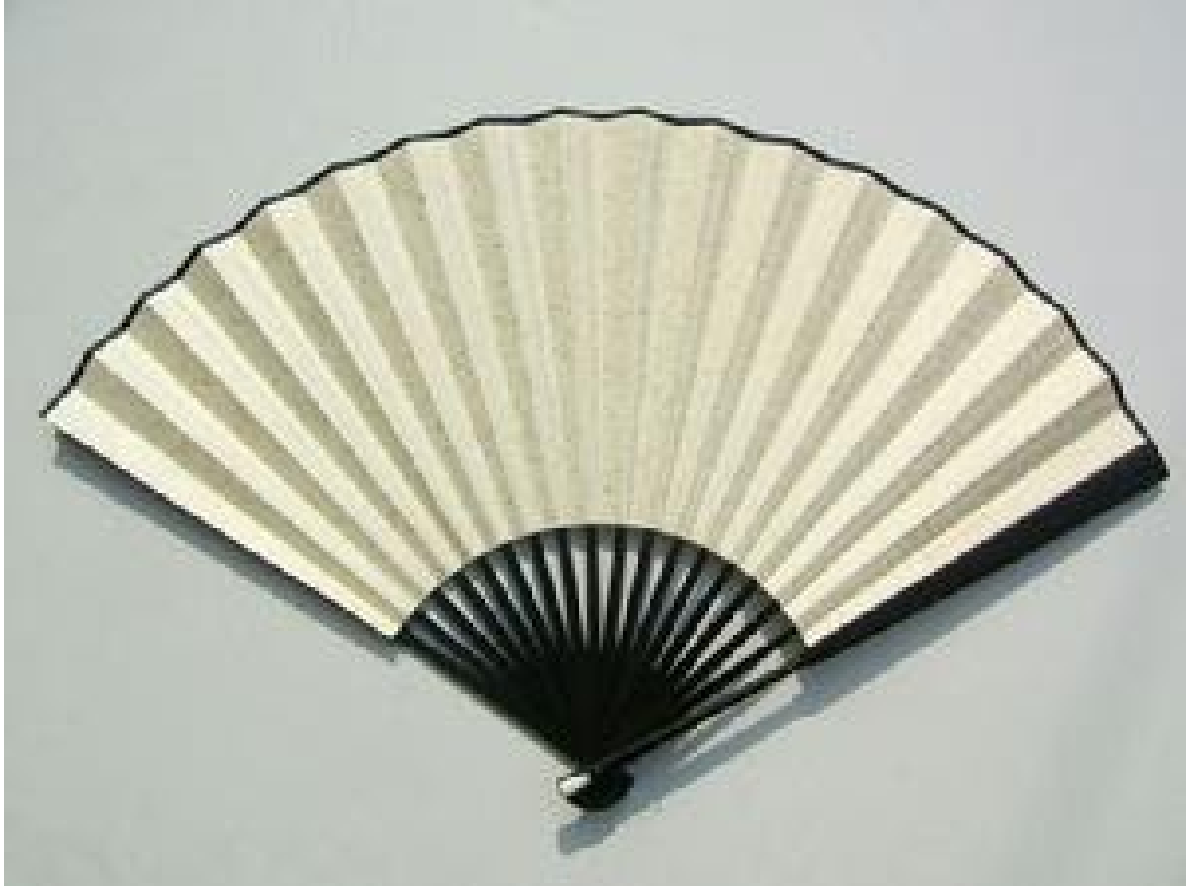

摺扇

- 非常不同意
- 不同意
- 有點不同意
- 普通
- 有點同意
- 同意
- 非常同意

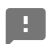

42. 對於這張圖片有熟悉感。 \*

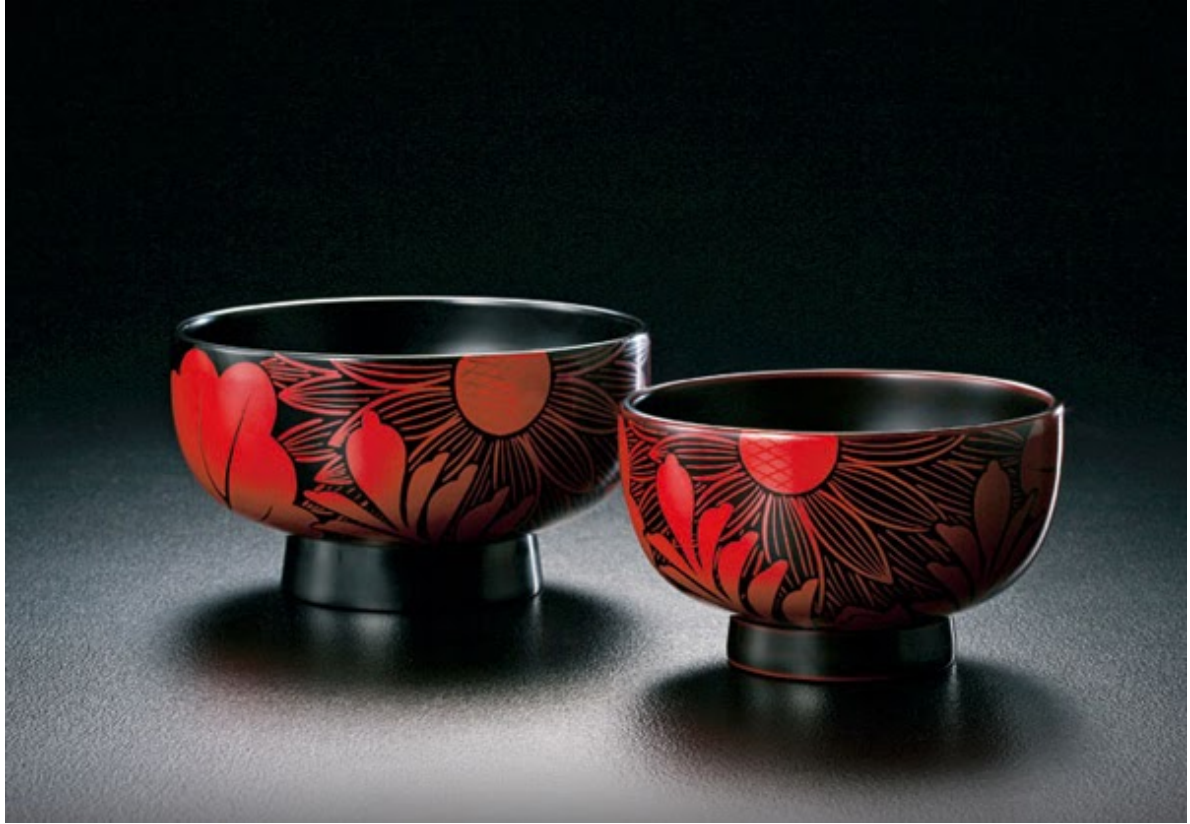

漆器

- 非常不同意
- 不同意
- 有點不同意
- 普通
- 有點同意
- 同意
- 非常同意

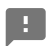

43. 對於這張圖片有熟悉感。 \*

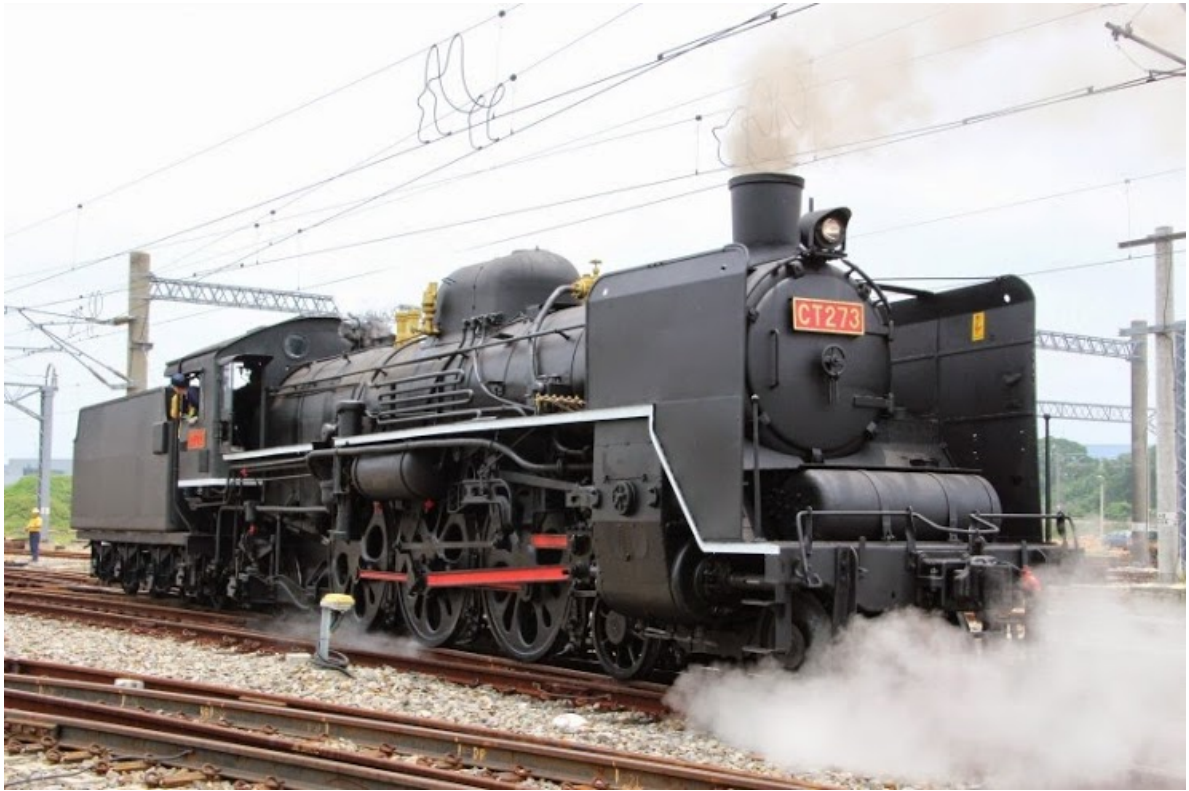

蒸汽火車

- 非常不同意
- 不同意
- 有點不同意
- 普通
- 有點同意
- 同意
- 非常同意





44. 對於這張圖片有熟悉感。 \*

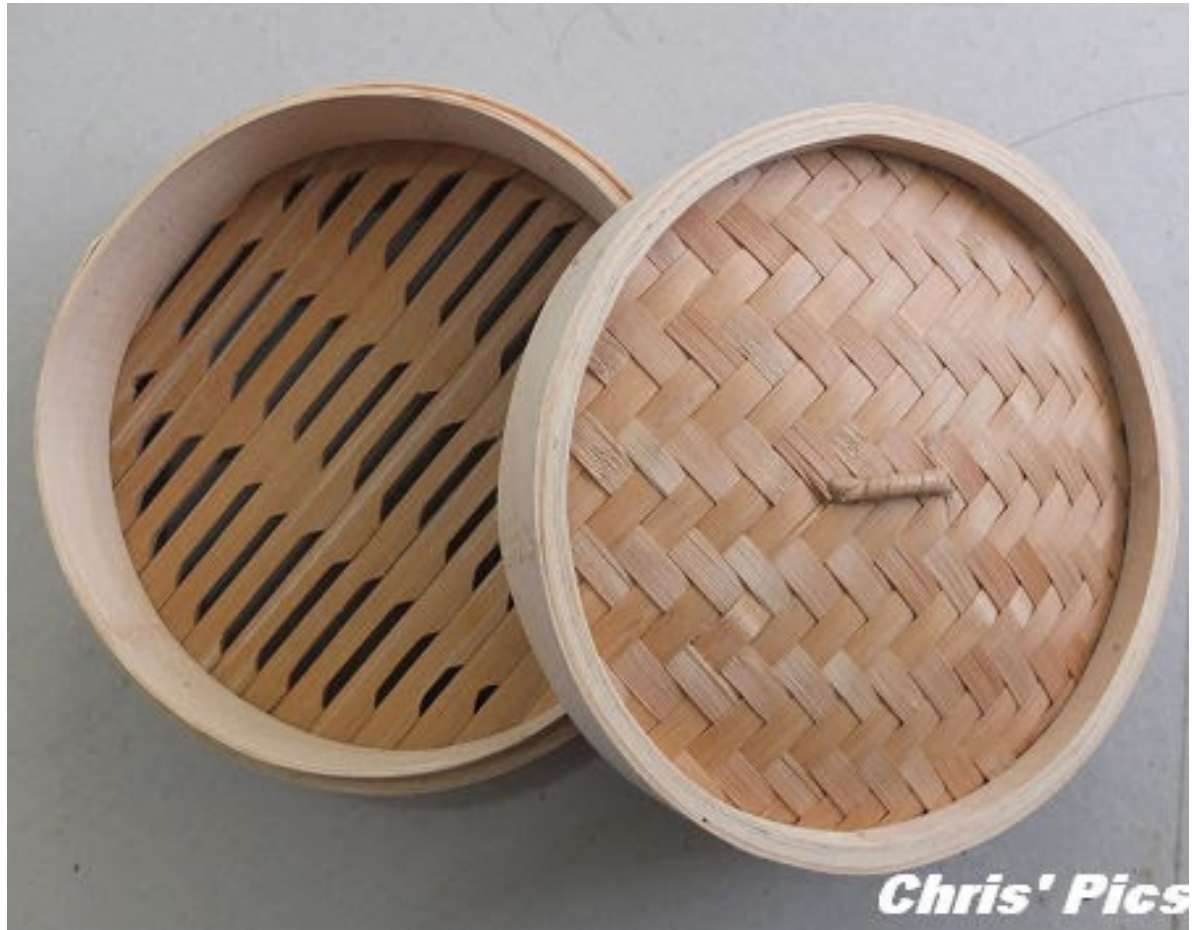

蒸籠

- 非常不同意
- 不同意
- 有點不同意
- 普通
- 有點同意
- 同意
- 非常同意

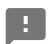

45. 對於這張圖片有熟悉感。 \*

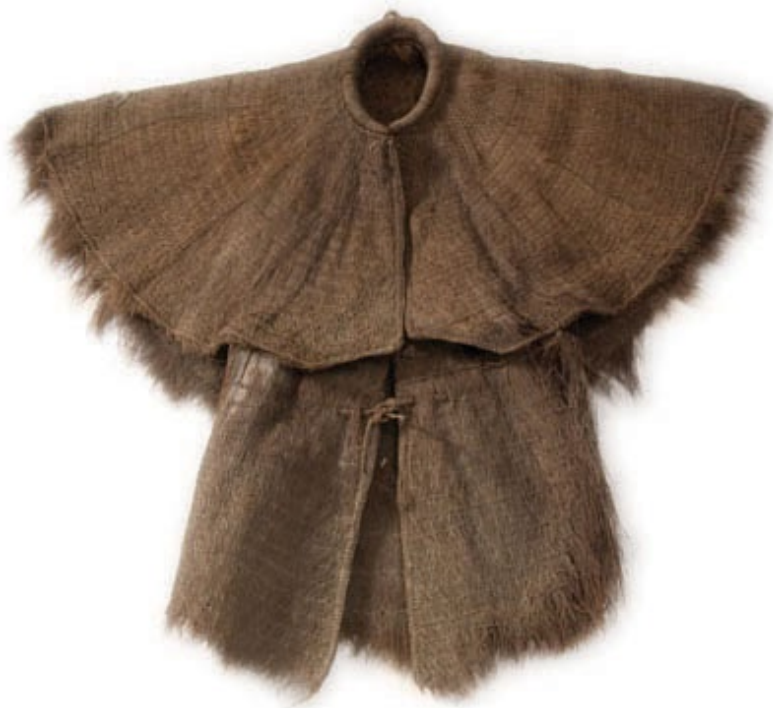

蓑衣

- 非常不同意
- 不同意
- 有點不同意
- 普通
- 有點同意
- 同意
- 非常同意

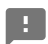

46. 對於這張圖片有熟悉感。 \*

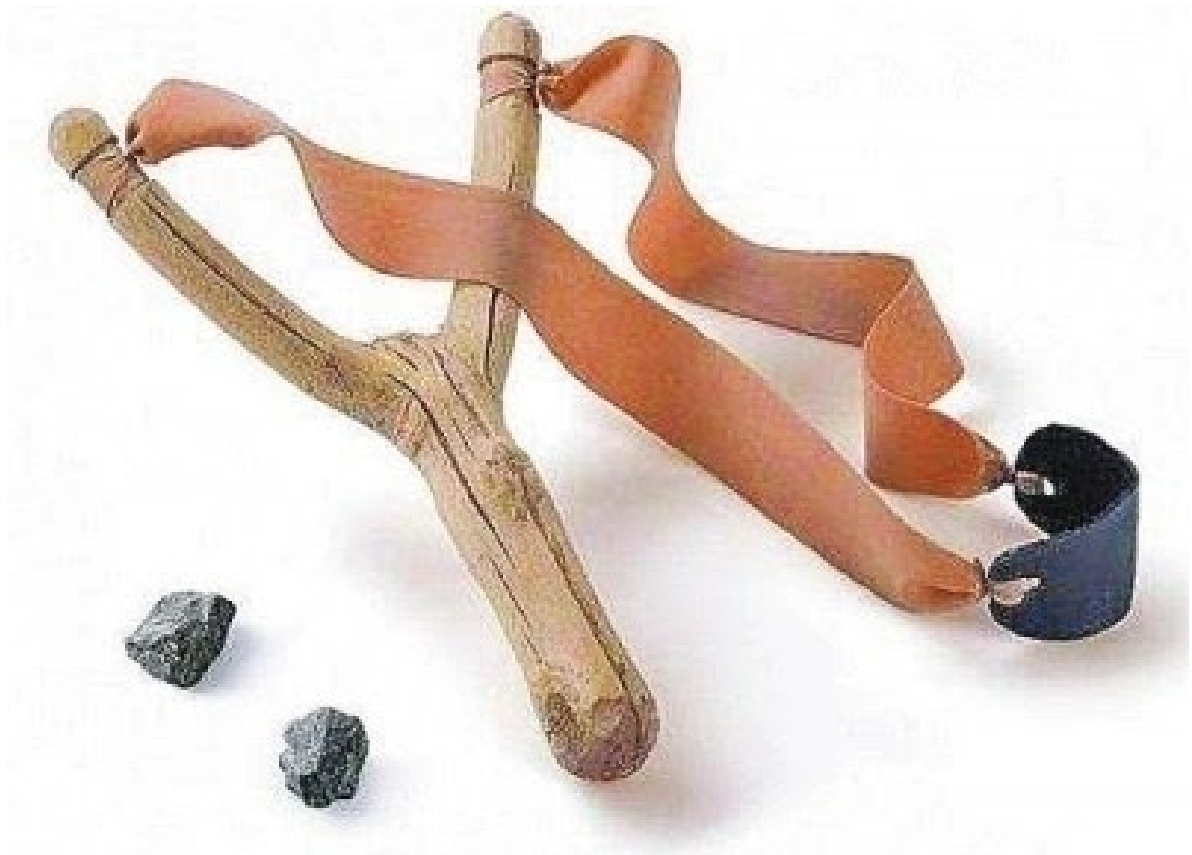

彈弓

- 非常不同意
- 不同意
- 有點不同意
- 普通
- 有點同意
- 同意
- 非常同意

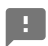

47. 對於這張圖片有熟悉感。 \*

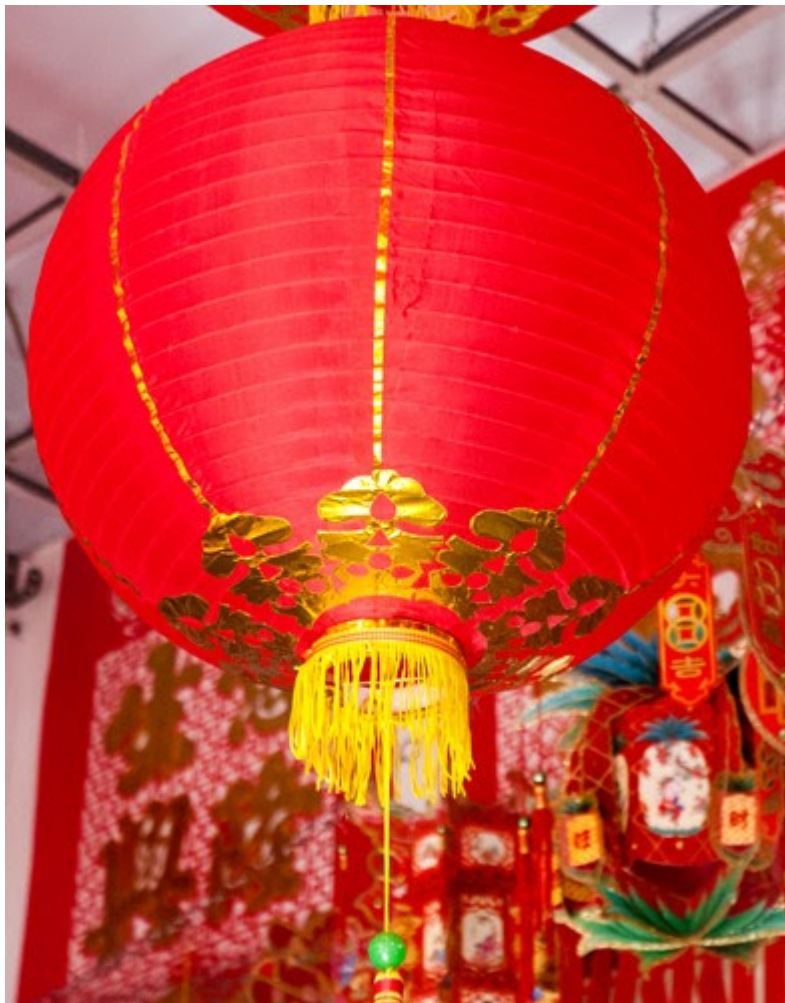

燈籠

- 非常不同意
- 不同意
- 有點不同意
- 普通
- 有點同意
- 同意
- 非常同意

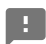



48. 對於這張圖片有熟悉感。 \*

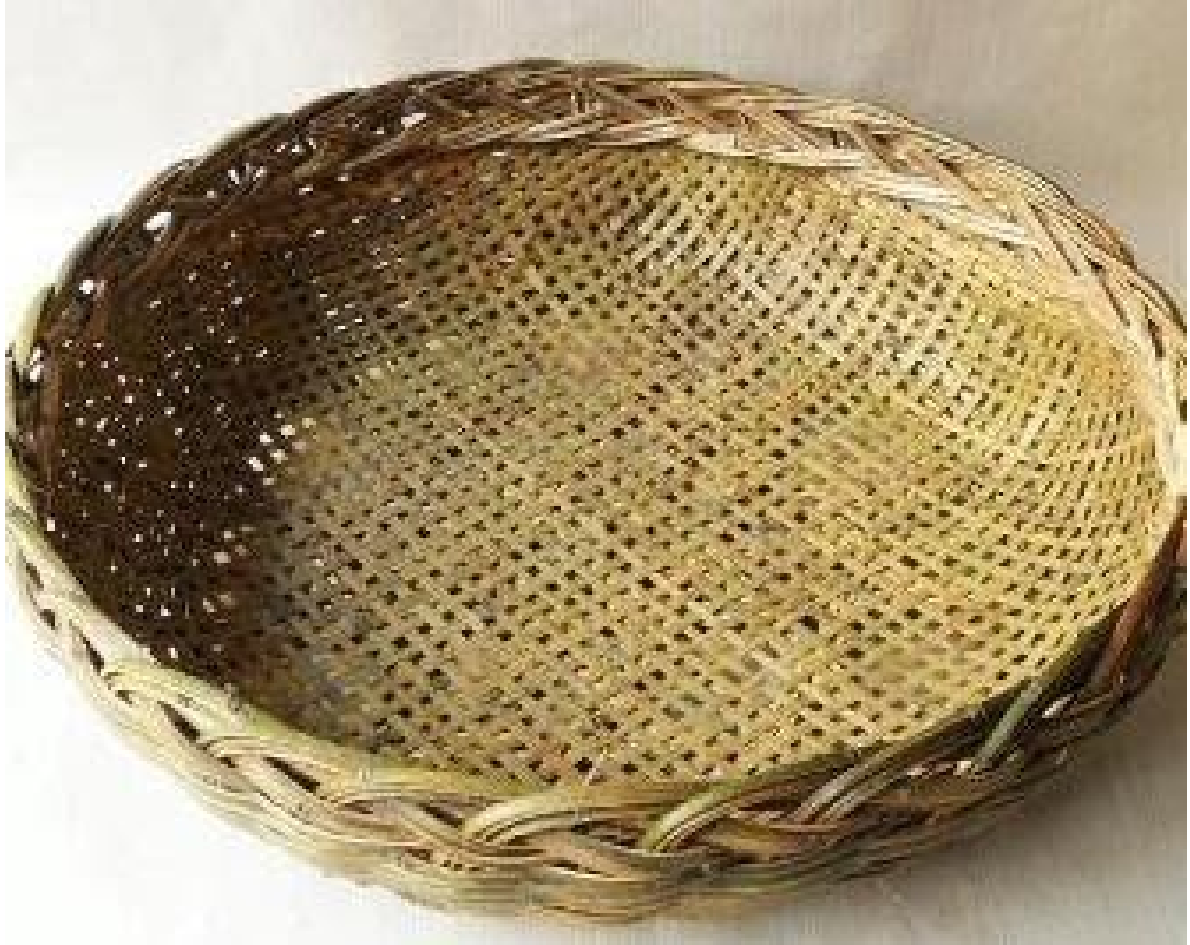

篩子

- 非常不同意
- 不同意
- 有點不同意
- 普通
- 有點同意
- 同意
- 非常同意



49. 對於這張圖片有熟悉感。 \*

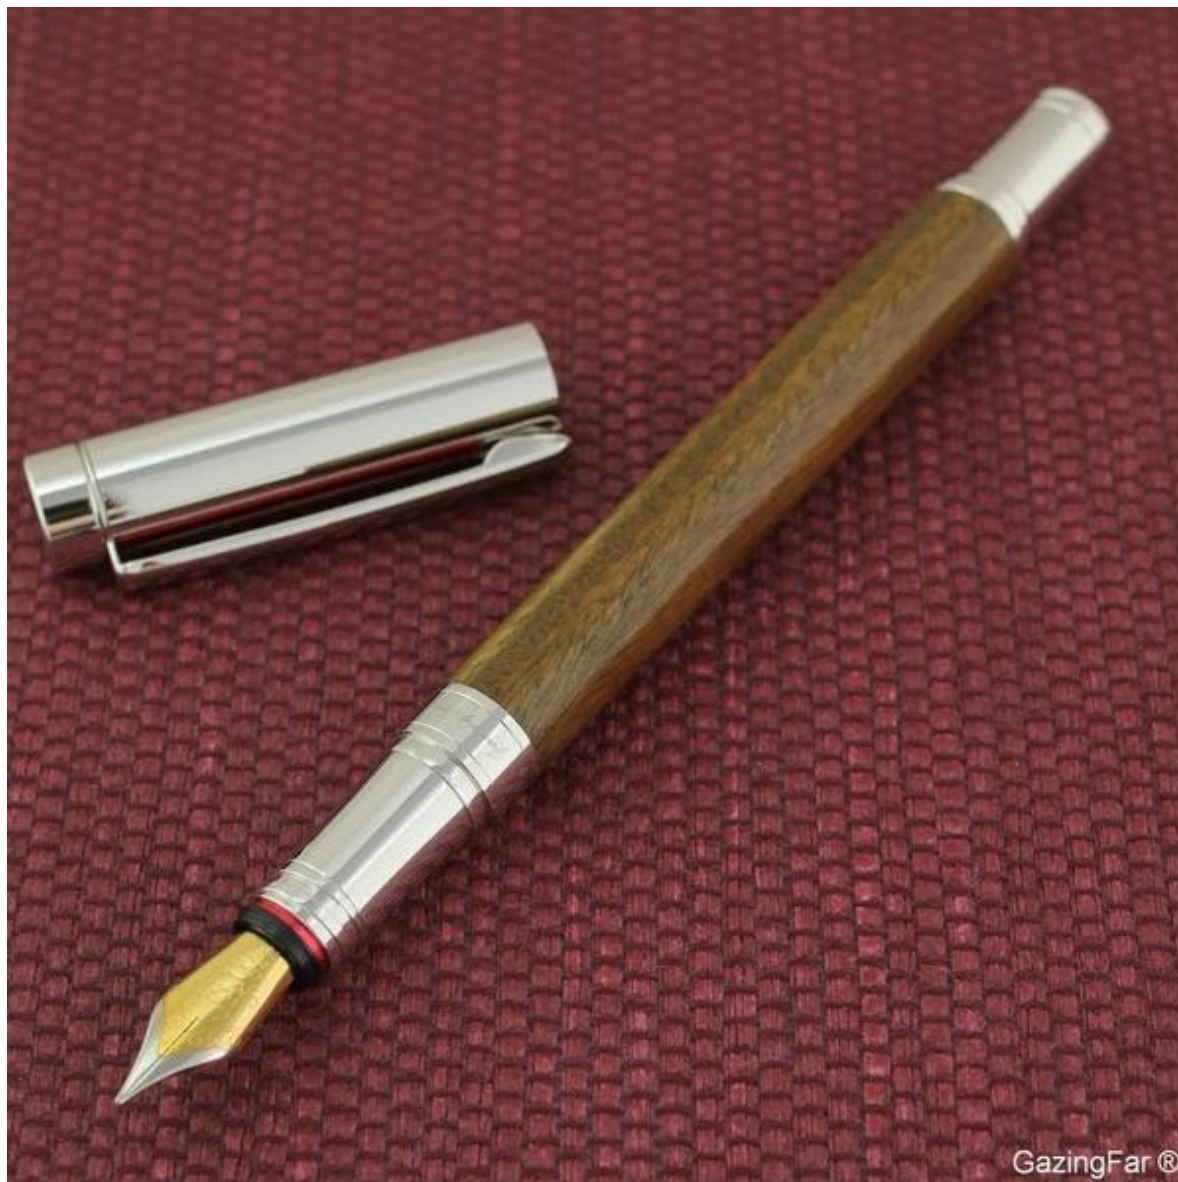

鋼筆

- 非常不同意
- 不同意
- 有點不同意
- 普通
- 有點同意
- 同意
- 非常同意

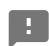

50. 對於這張圖片有熟悉感。 \*

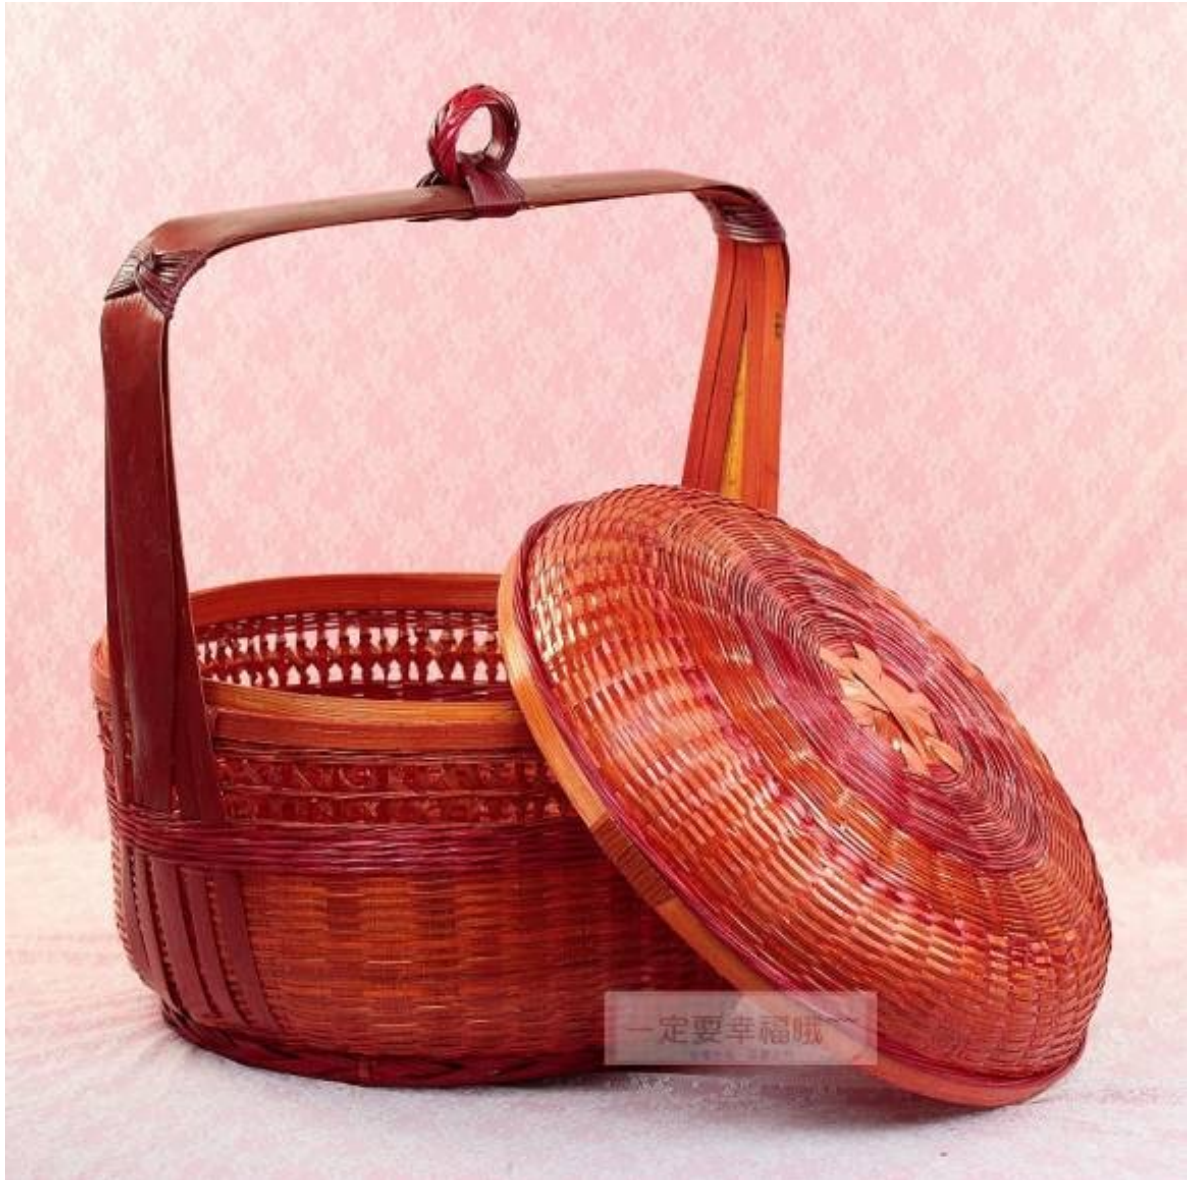

謝籃

- 非常不同意
- 不同意
- 有點不同意
- 普通
- 有點同意
- 同意
- 非常同意

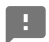



51. 對於這張圖片有熟悉感。 \*

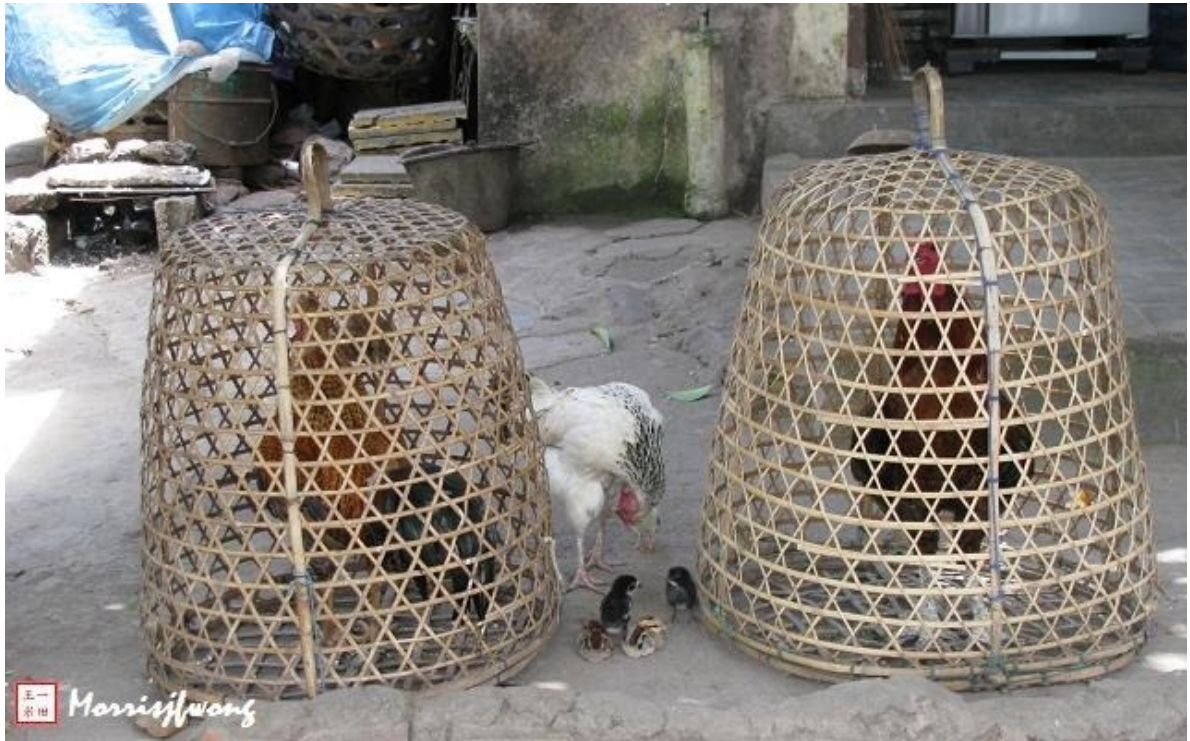

雞籠

- 非常不同意
- 不同意
- 有點不同意
- 普通
- 有點同意
- 同意
- 非常同意





52. 對於這張圖片有熟悉感。 \*

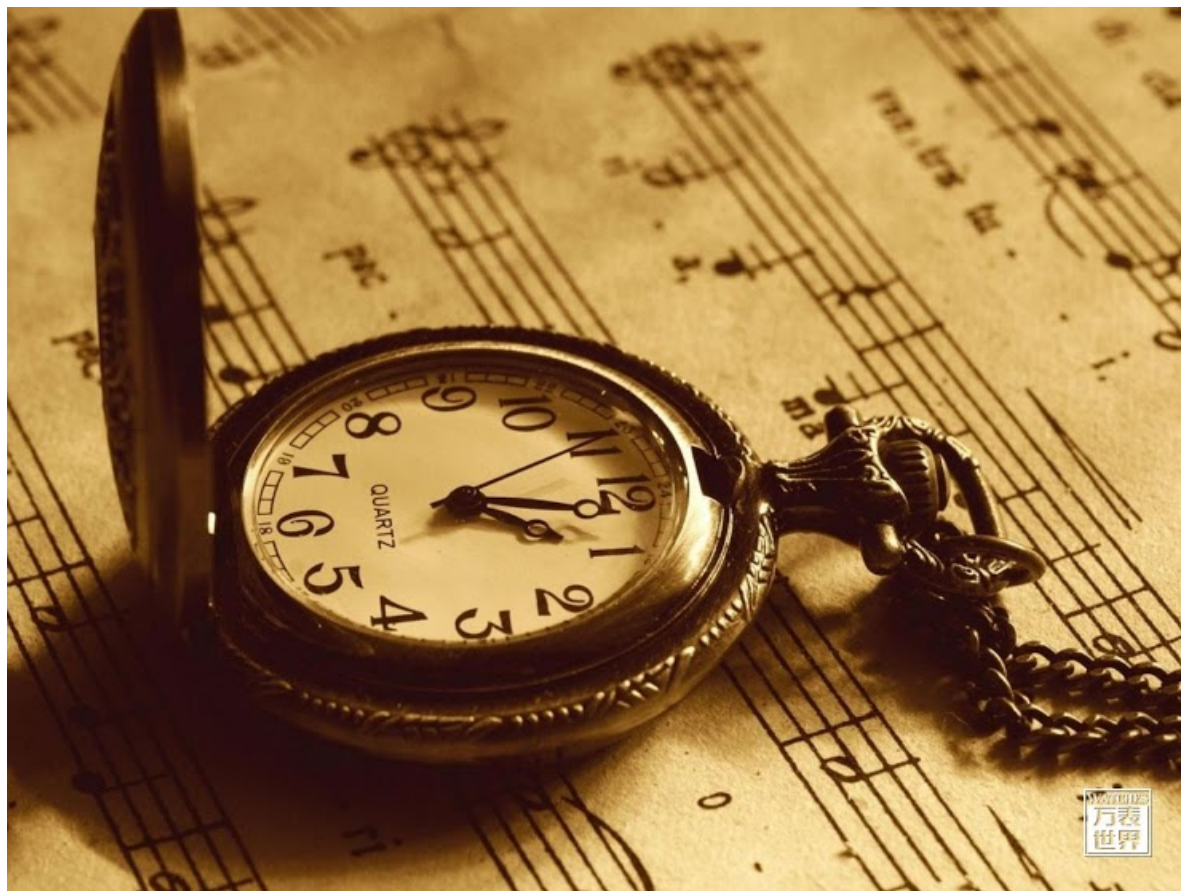

懷錶

- 非常不同意
- 不同意
- 有點不同意
- 普通
- 有點同意
- 同意
- 非常同意



53. 對於這張圖片有熟悉感。 \*

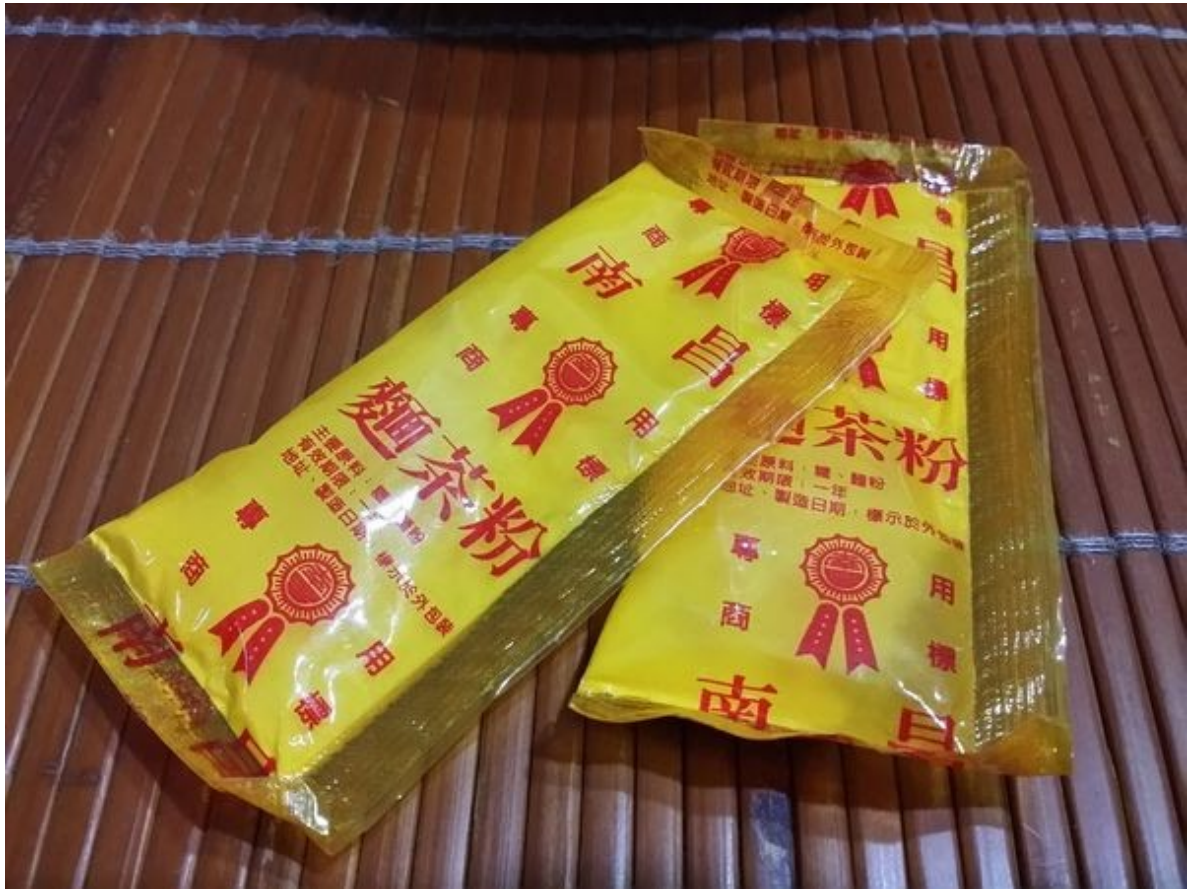

麵茶粉

- 非常不同意
- 不同意
- 有點不同意
- 普通
- 有點同意
- 同意
- 非常同意



54. 對於這張圖片有熟悉感。 \*

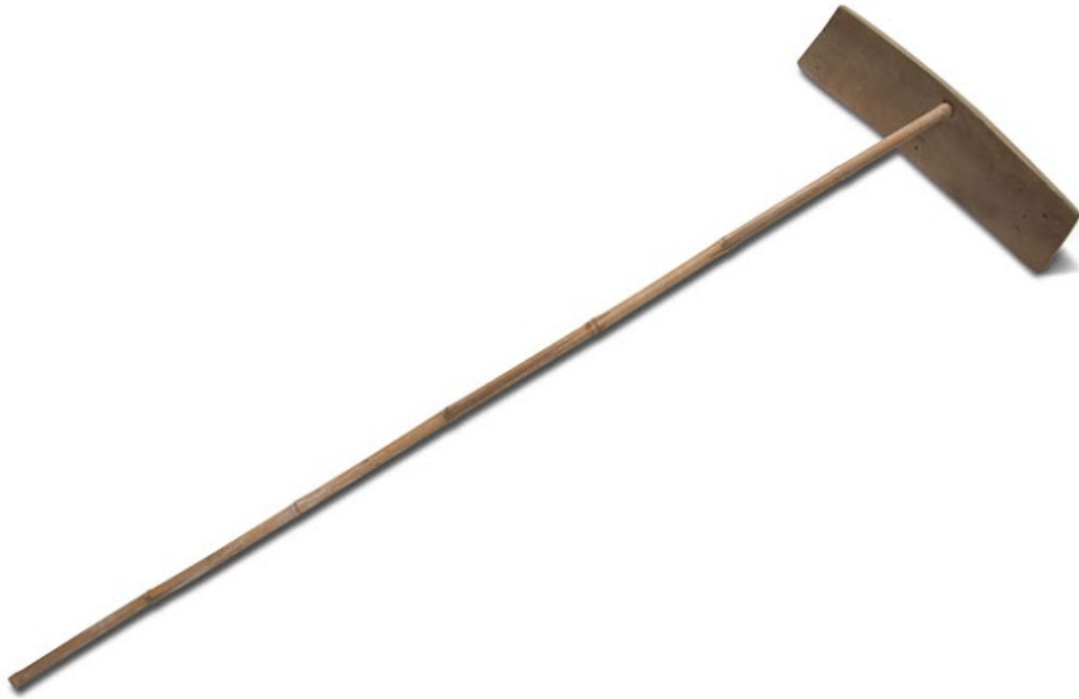

曬穀耙

- 非常不同意
- 不同意
- 有點不同意
- 普通
- 有點同意
- 同意
- 非常同意



55. 對於這張圖片有熟悉感。 \*

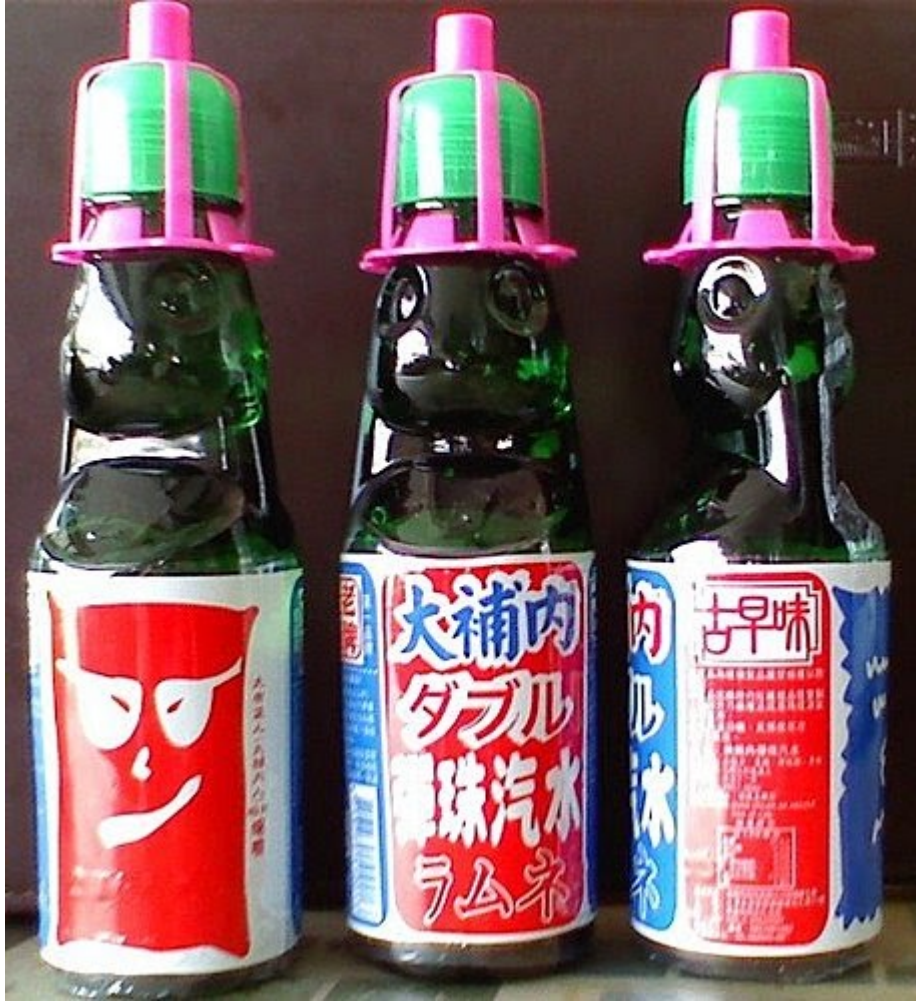

彈珠汽水

- 非常不同意
- 不同意
- 有點不同意
- 普通
- 有點同意
- 同意
- 非常同意





56. 對於這張圖片有熟悉感。 \*

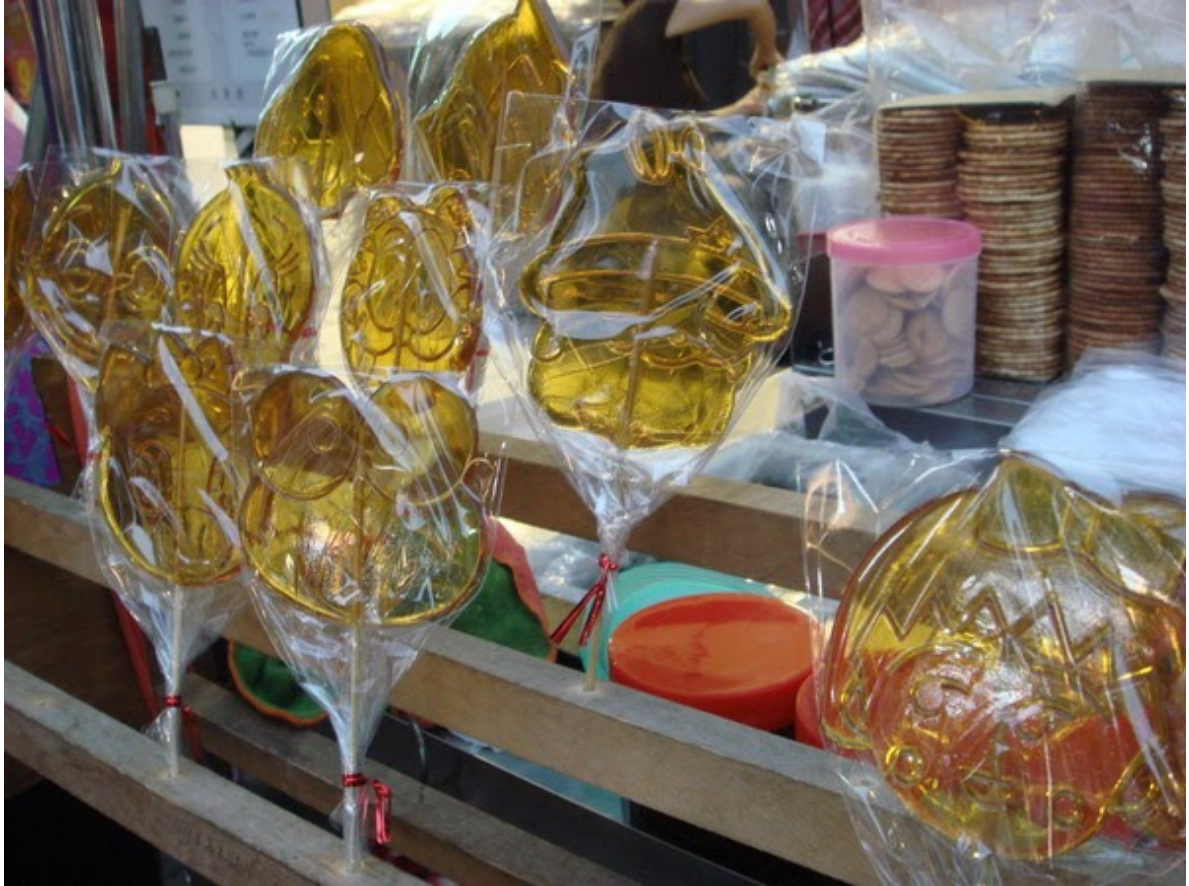

麥芽糖

- 非常不同意
- 不同意
- 有點不同意
- 普通
- 有點同意
- 同意
- 非常同意



57. 對於這張圖片有熟悉感。 \*

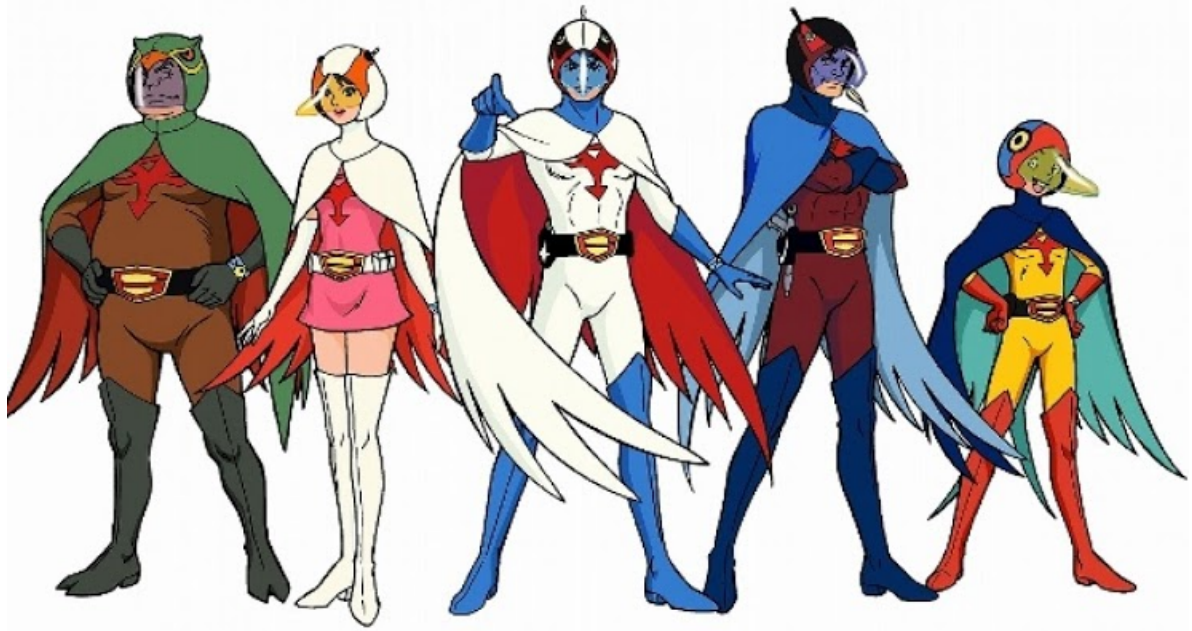

科學小飛俠

- 非常不同意
- 不同意
- 有點不同意
- 普通
- 有點同意
- 同意
- 非常同意



58. 對於這張圖片有熟悉感。 \*

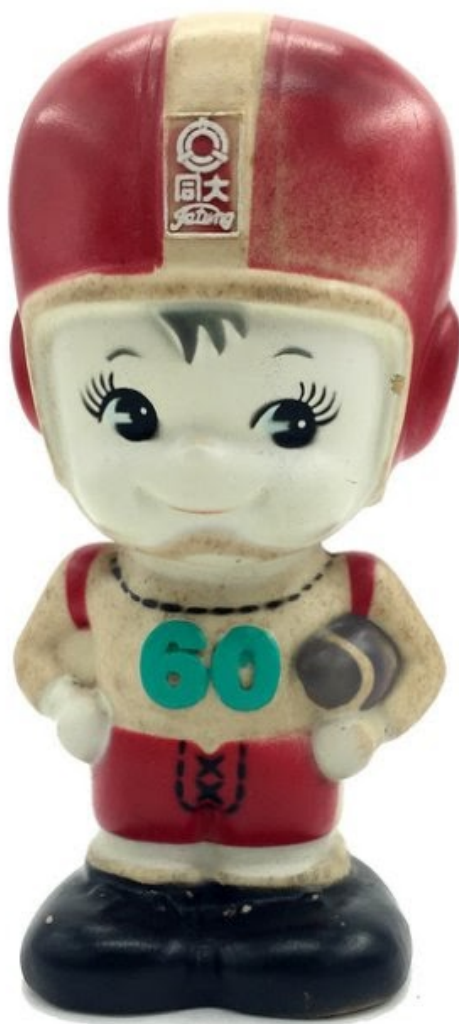

大同寶寶

- 非常不同意
- 不同意
- 有點不同意
- 普通
- 有點同意
- 同意
- 非常同意



59. 對於這張圖片有熟悉感。 \*

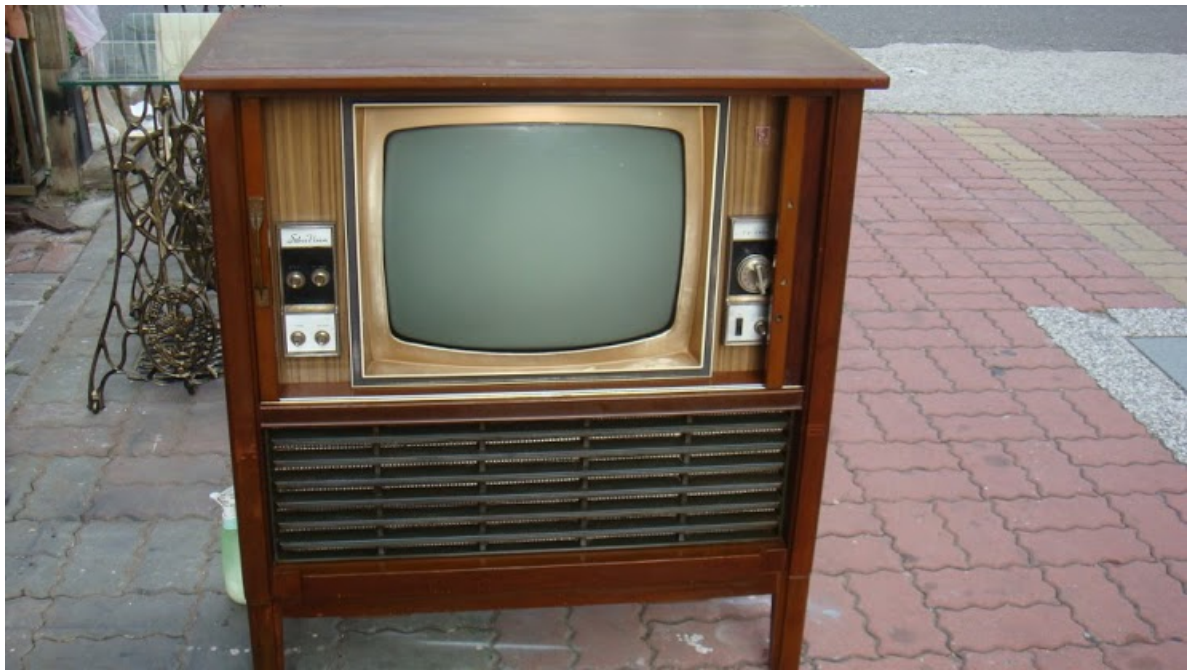

電視

- 非常不同意
- 不同意
- 有點不同意
- 普通
- 有點同意
- 同意
- 非常同意





60. 對於這張圖片有熟悉感。 \*

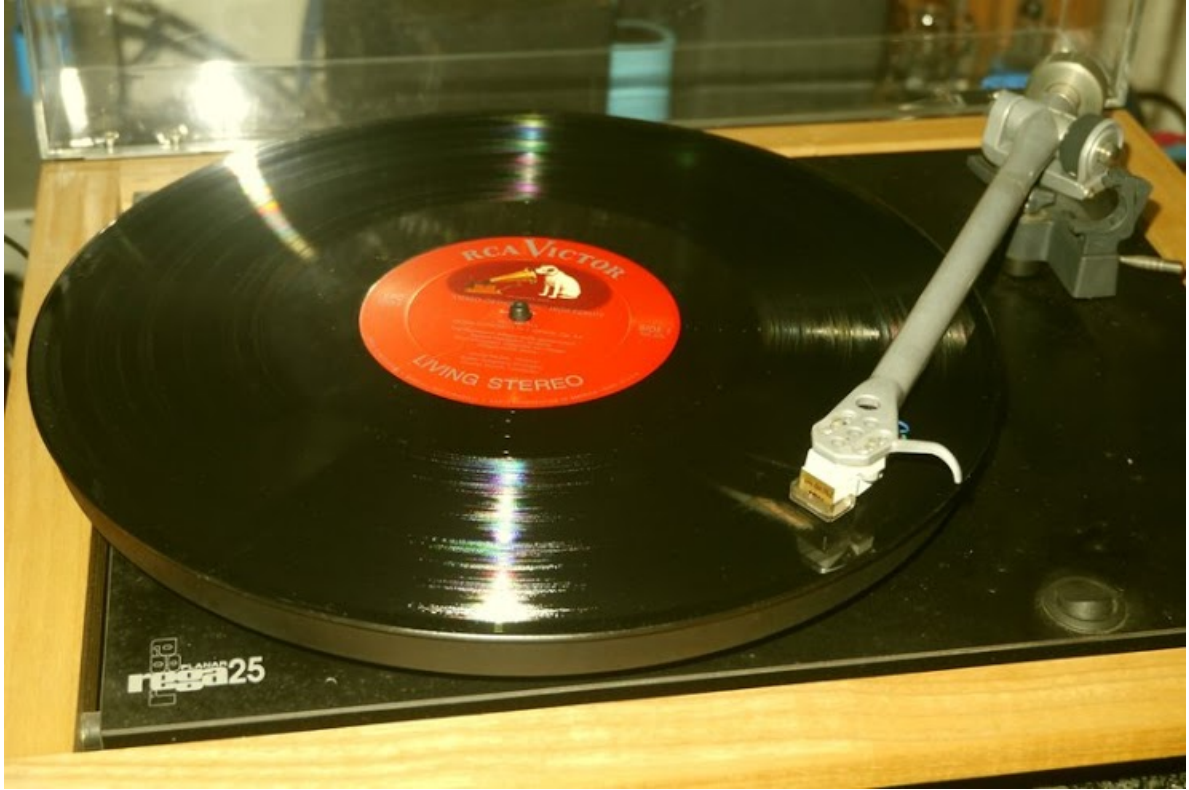

黑膠唱片

- 非常不同意
- 不同意
- 有點不同意
- 普通
- 有點同意
- 同意
- 非常同意



61. 對於這張圖片有熟悉感。 \*

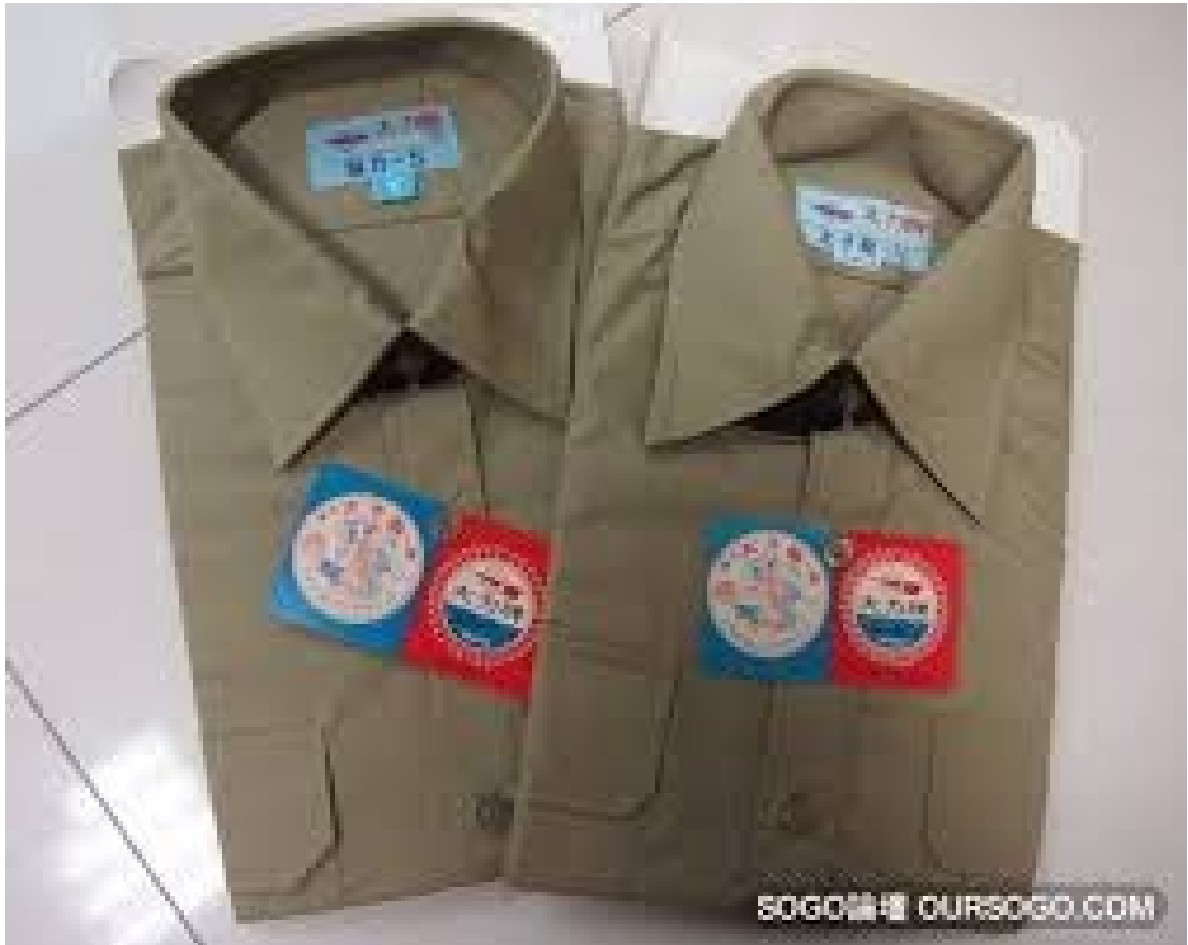

太子龍學生服

- 非常不同意
- 不同意
- 有點不同意
- 普通
- 有點同意
- 同意
- 非常同意



62. 對於這張圖片有熟悉感。 \*

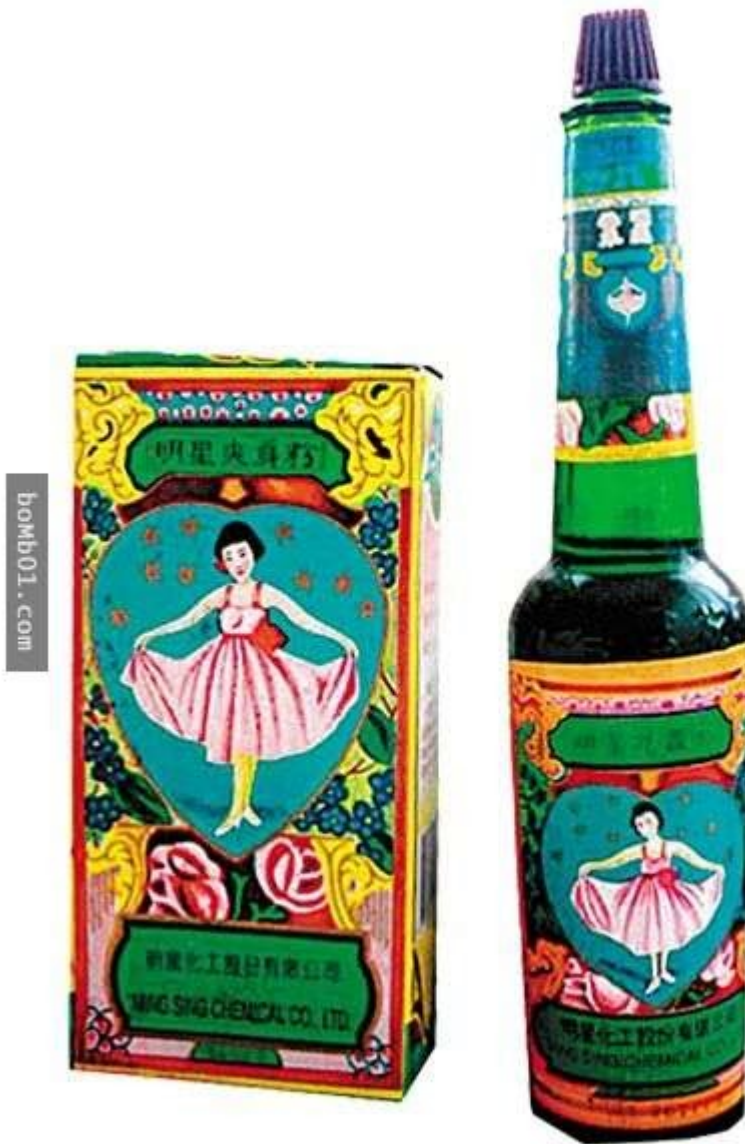

明星花露水

- 非常不同意
- 不同意
- 有點不同意
- 普通
- 有點同意
- 同意
- 非常同意

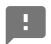

63. 對於這張圖片有熟悉感。 \*

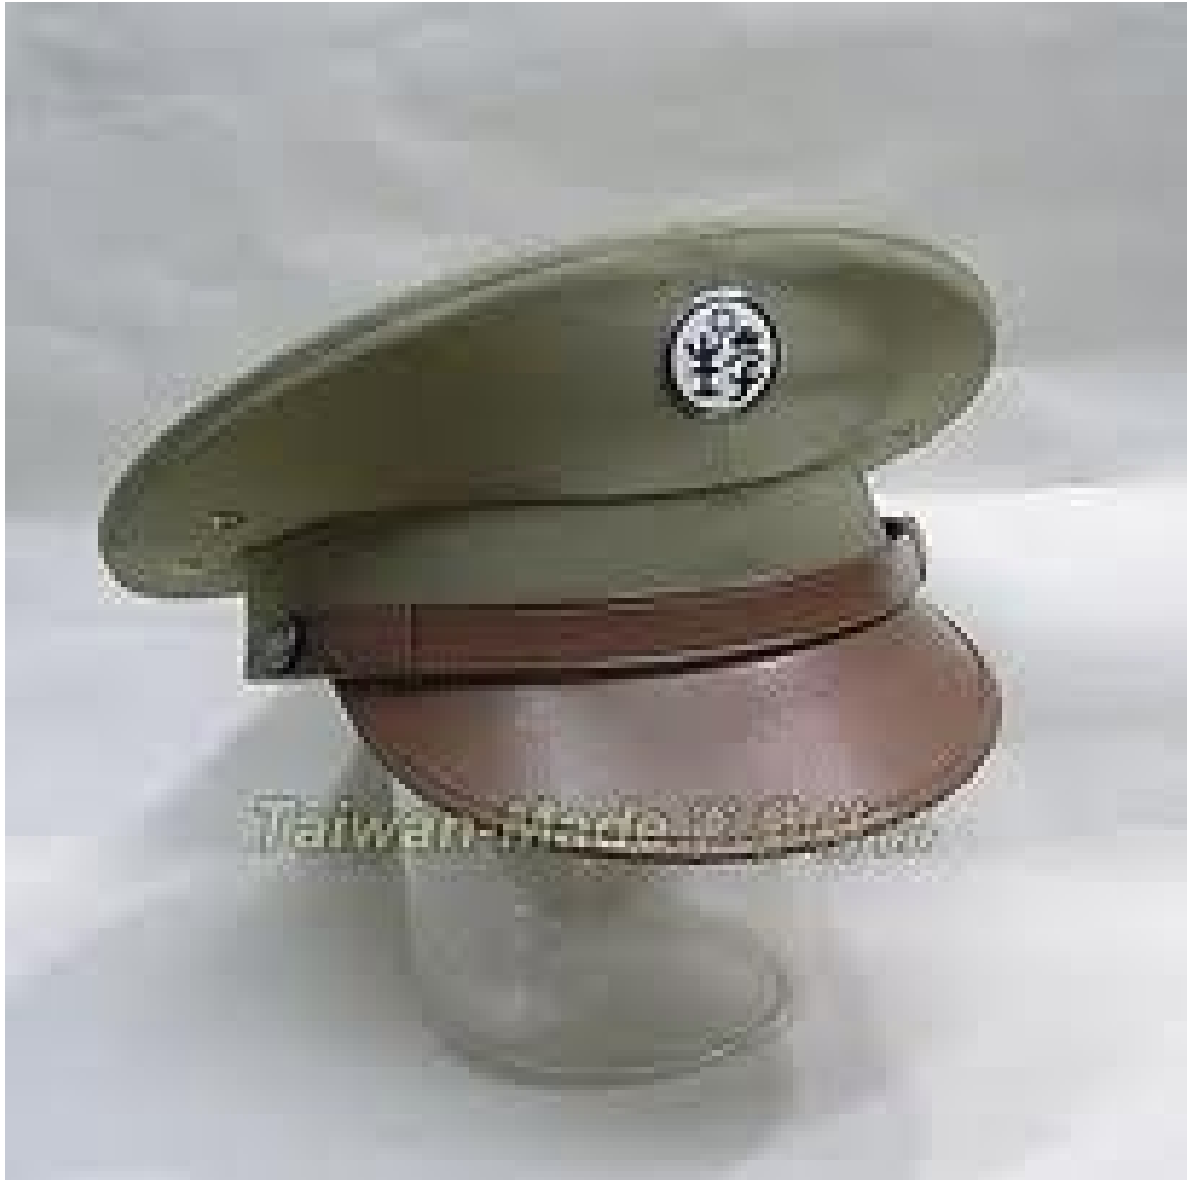

大盤帽

- 非常不同意
- 不同意
- 有點不同意
- 普通
- 有點同意
- 同意
- 非常同意





64. 對於這張圖片有熟悉感。 \*

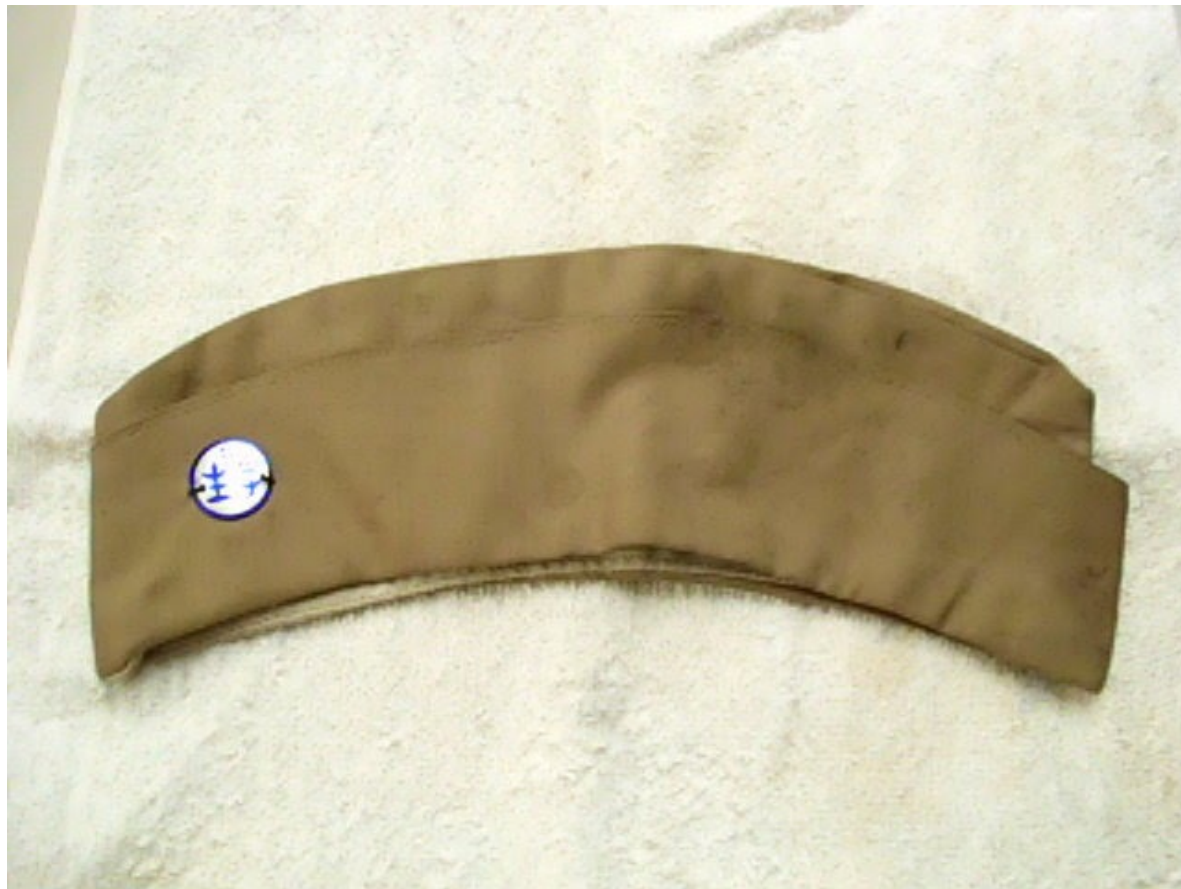

船型帽

- 非常不同意
- 不同意
- 有點不同意
- 普通
- 有點同意
- 同意
- 非常同意



65. 對於這張圖片有熟悉感。 \*

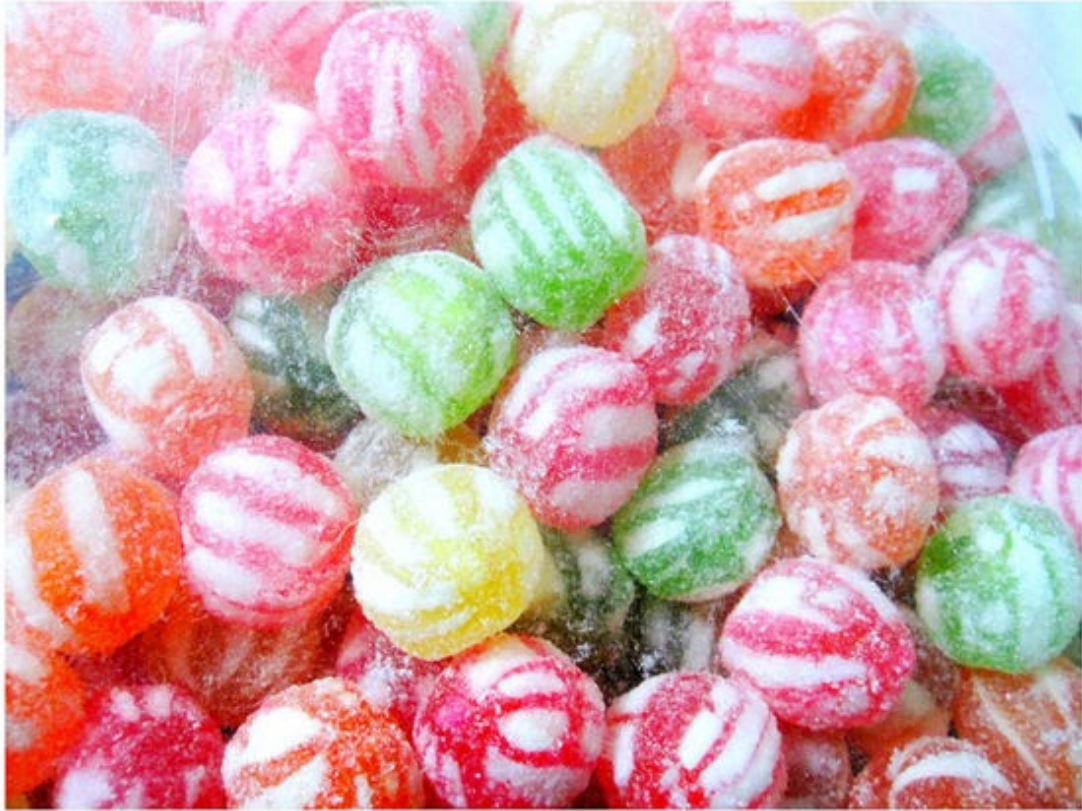

西瓜糖

- 非常不同意
- 不同意
- 有點不同意
- 普通
- 有點同意
- 同意
- 非常同意



66. 對於這張圖片有熟悉感。 \*

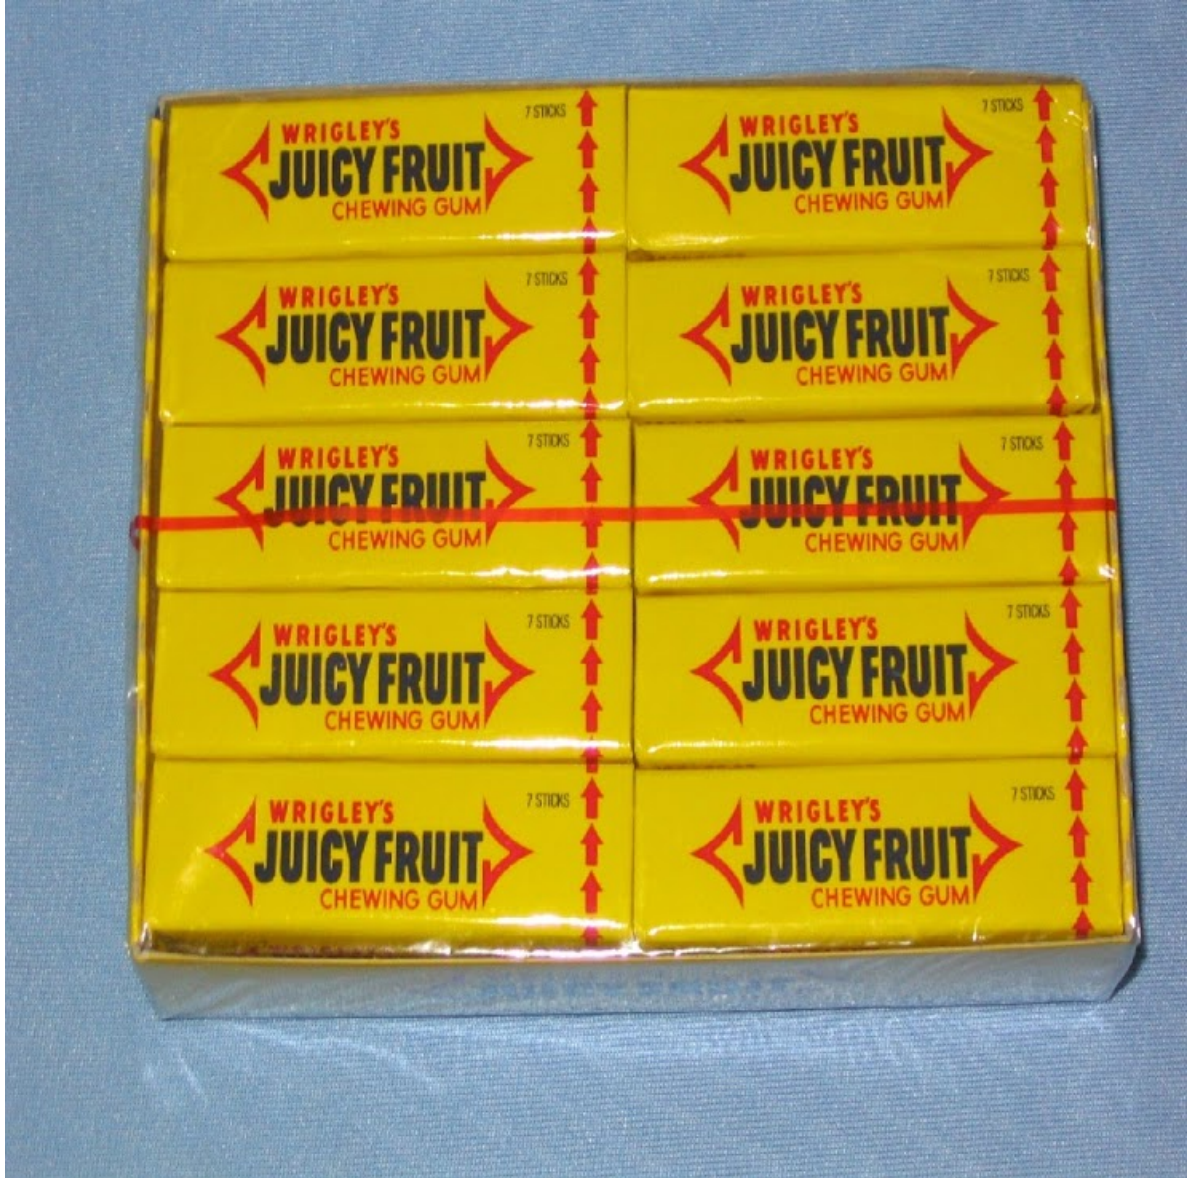

黃箭口香糖

- 非常不同意
- 不同意
- 有點不同意
- 普通
- 有點同意
- 同意
- 非常同意





67. 對於這張圖片有熟悉感。 \*

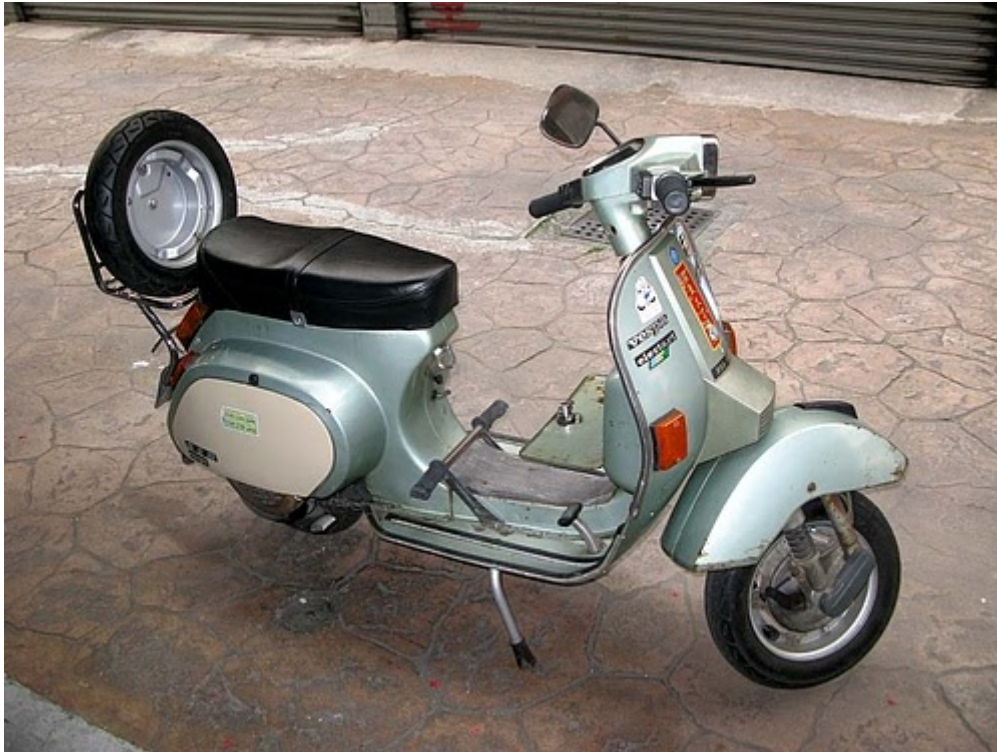

偉士牌機車

- 非常不同意
- 不同意
- 有點不同意
- 普通
- 有點同意
- 同意
- 非常同意





68. 對於這張圖片有熟悉感。 \*

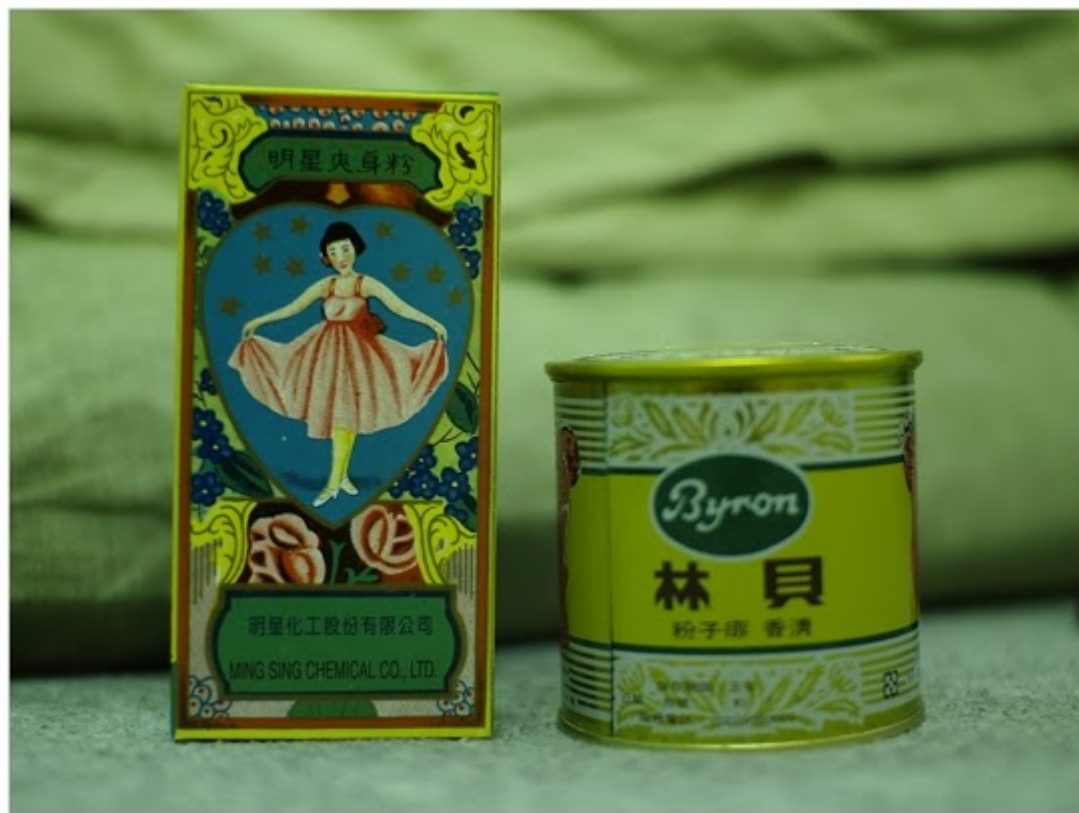

OLYMPUS IMAGING CORP. E-500

wall002

痲子粉

- 非常不同意
- 不同意
- 有點不同意
- 普通
- 有點同意
- 同意
- 非常同意



69. 對於這張圖片有熟悉感。 \*

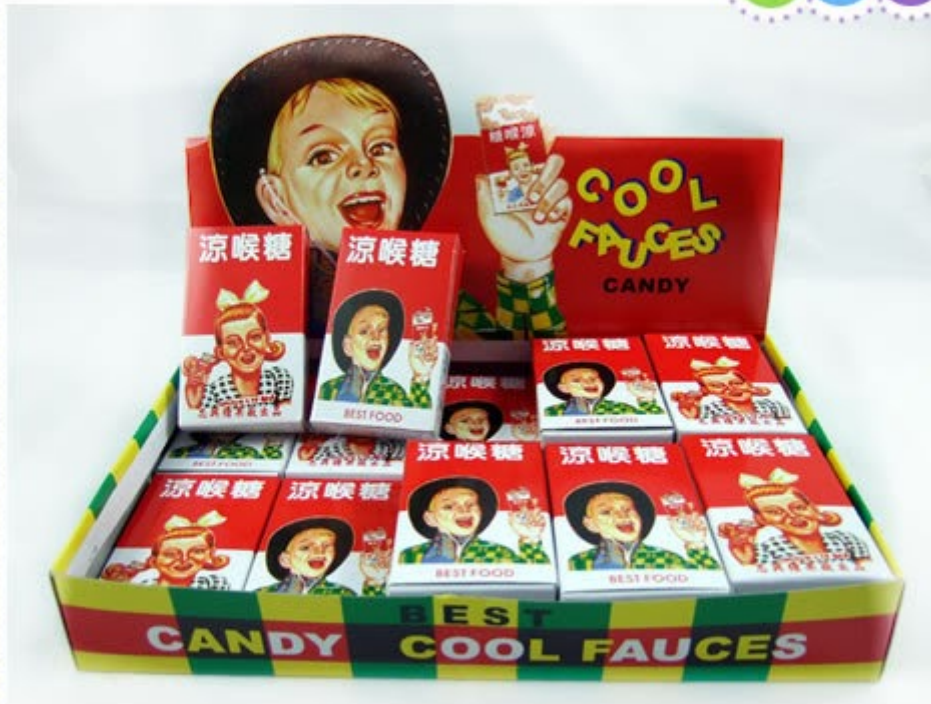

凉喉糖

- 非常不同意
- 不同意
- 有點不同意
- 普通
- 有點同意
- 同意
- 非常同意

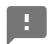

70. 對於這張圖片有熟悉感。 \*

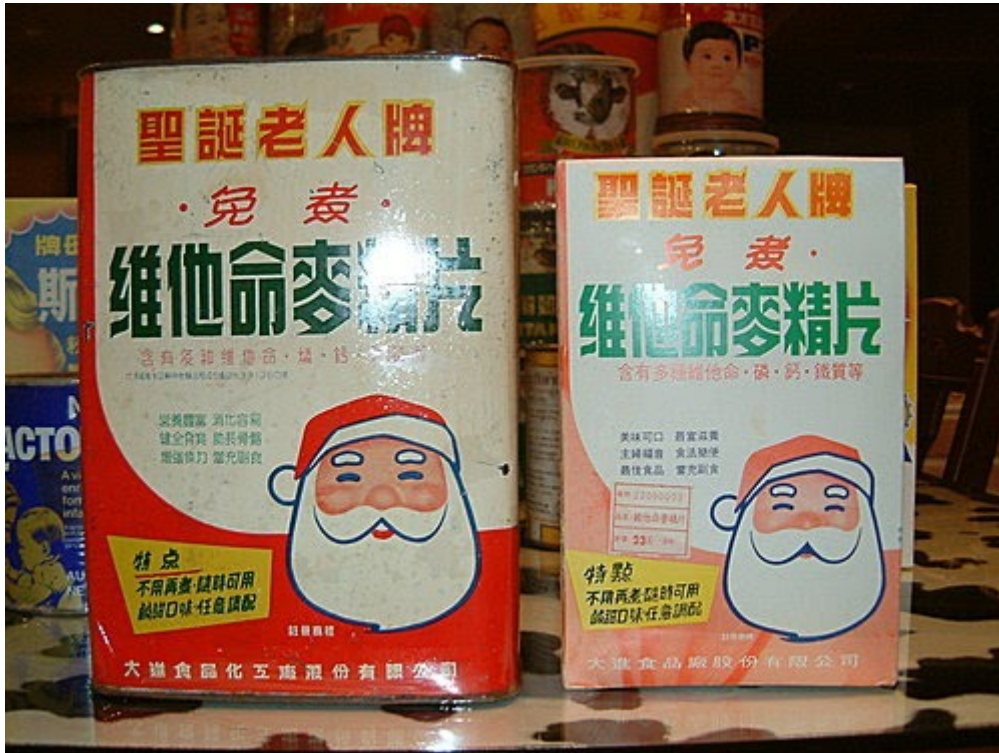

聖誕老人牌

- 非常不同意
- 不同意
- 有點不同意
- 普通
- 有點同意
- 同意
- 非常同意

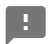

71. 對於這張圖片有熟悉感。 \*

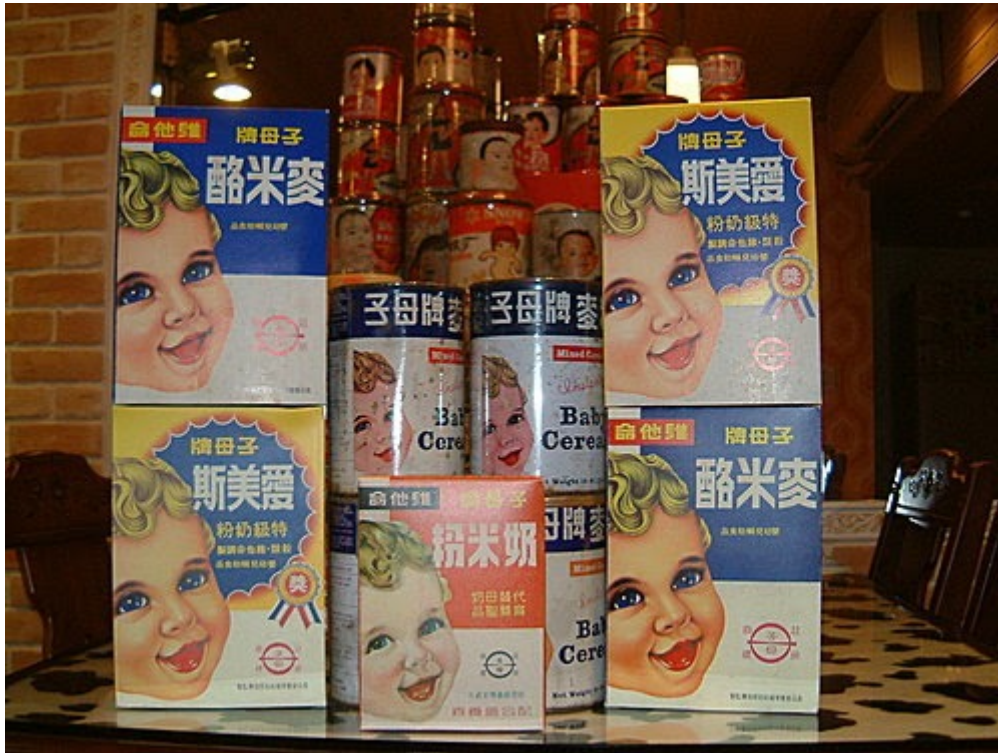

子母牌奶粉

- 非常不同意
- 不同意
- 有點不同意
- 普通
- 有點同意
- 同意
- 非常同意





72. 對於這張圖片有熟悉感。 \*

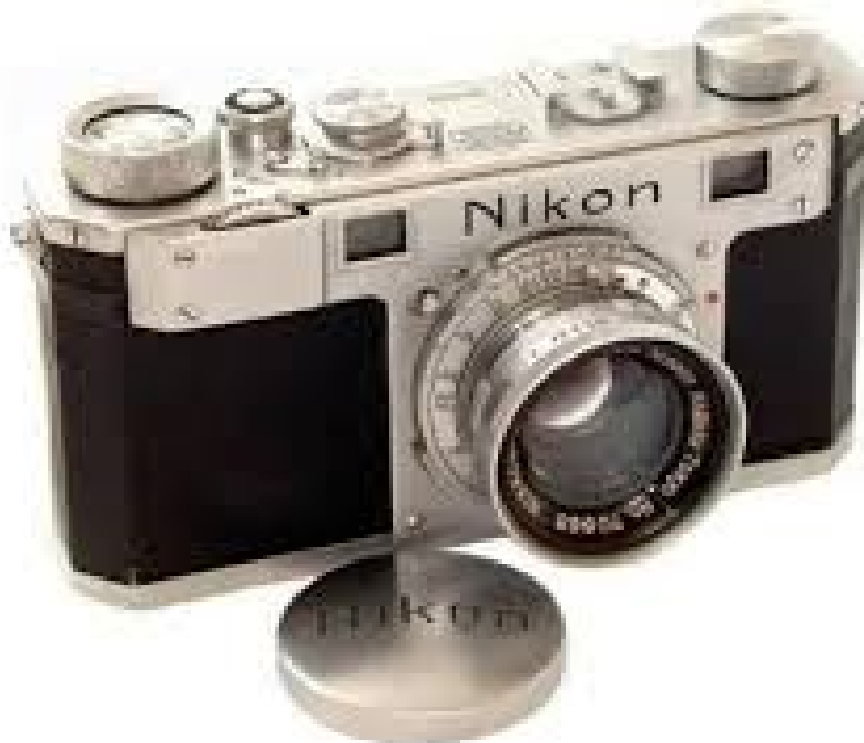

相機

- 非常不同意
- 不同意
- 有點不同意
- 普通
- 有點同意
- 同意
- 非常同意



73. 對於這張圖片有熟悉感。 \*

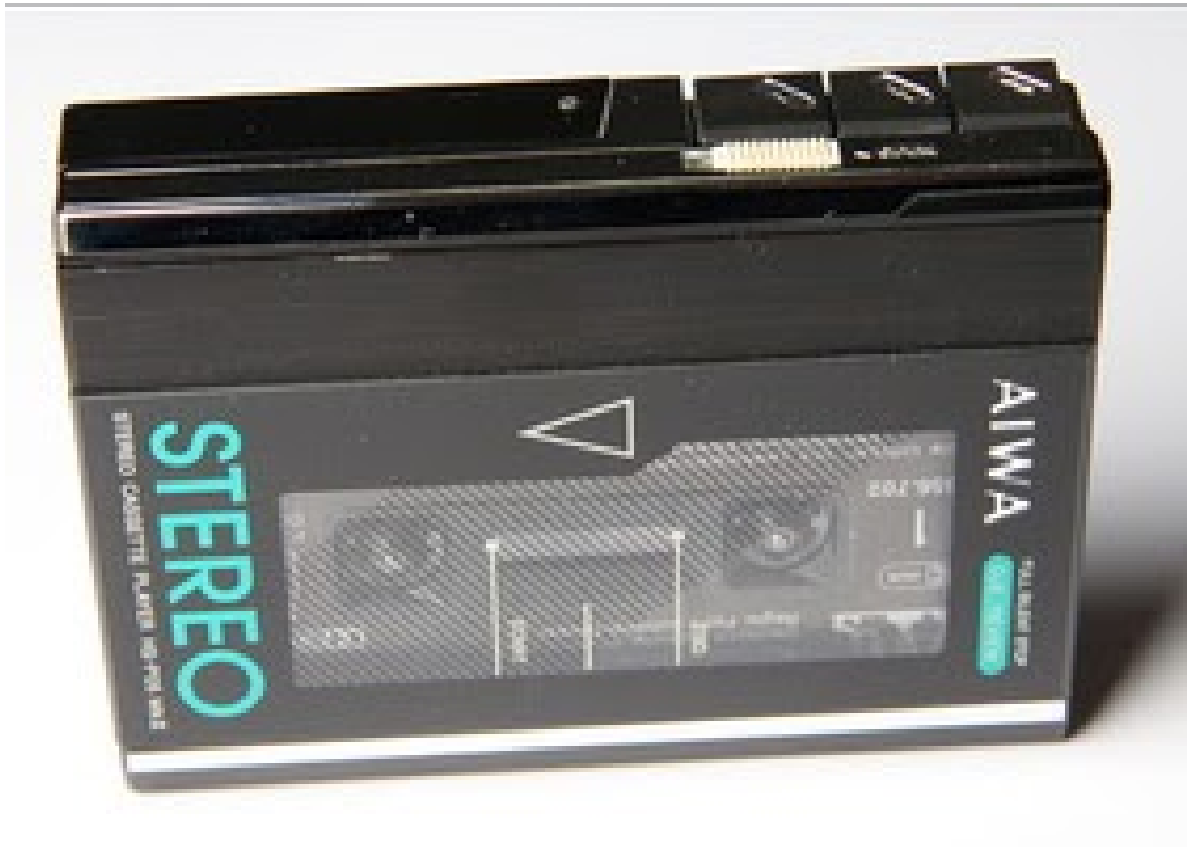

錄音帶

- 非常不同意
- 不同意
- 有點不同意
- 普通
- 有點同意
- 同意
- 非常同意



74. 對於這張圖片有熟悉感。 \*

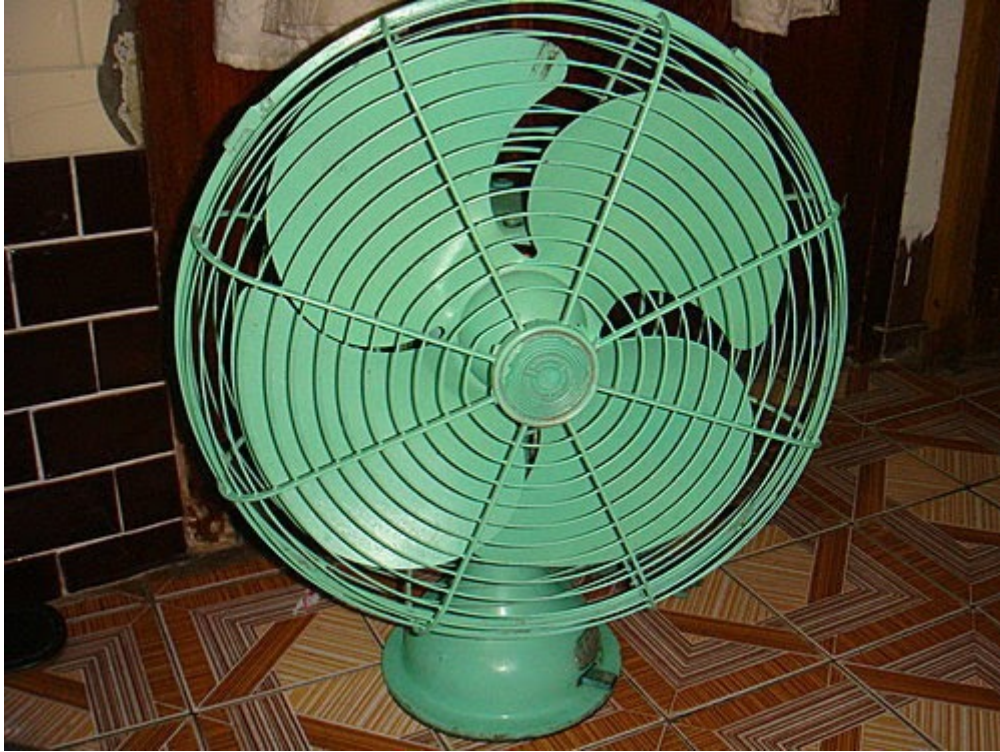

大同電扇

- 非常不同意
- 不同意
- 有點不同意
- 普通
- 有點同意
- 同意
- 非常同意



75. 對於這張圖片有熟悉感。 \*

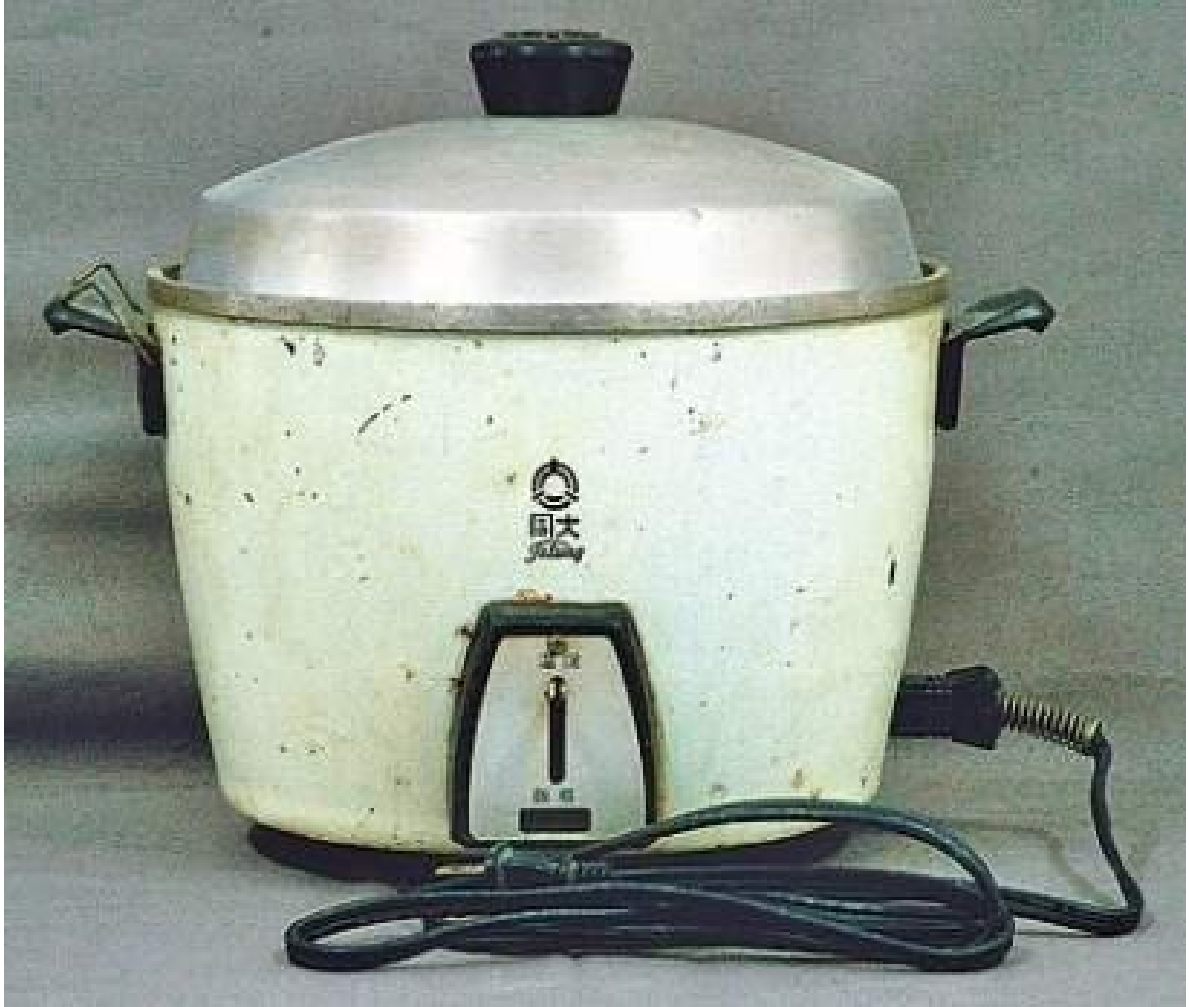

大同電鍋

- 非常不同意
- 不同意
- 有點不同意
- 普通
- 有點同意
- 同意
- 非常同意





76. 對於這張圖片有熟悉感。 \*

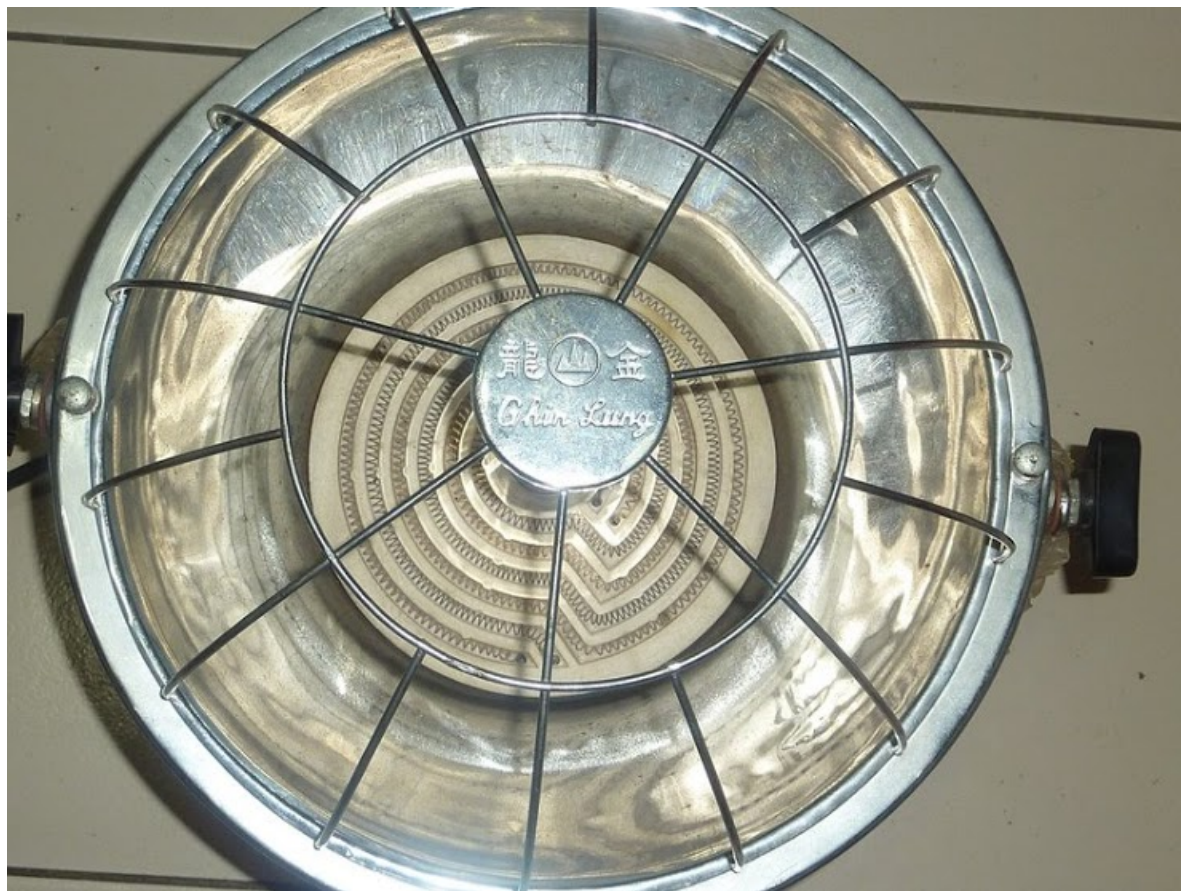

鎢絲電暖爐

- 非常不同意
- 不同意
- 有點不同意
- 普通
- 有點同意
- 同意
- 非常同意



77. 對於這張圖片有熟悉感。 \*

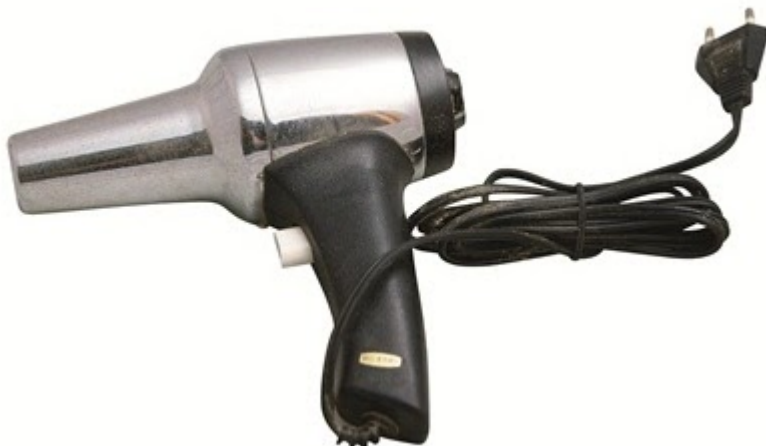

吹風機

- 非常不同意
- 不同意
- 有點不同意
- 普通
- 有點同意
- 同意
- 非常同意



78. 對於這張圖片有熟悉感。 \*

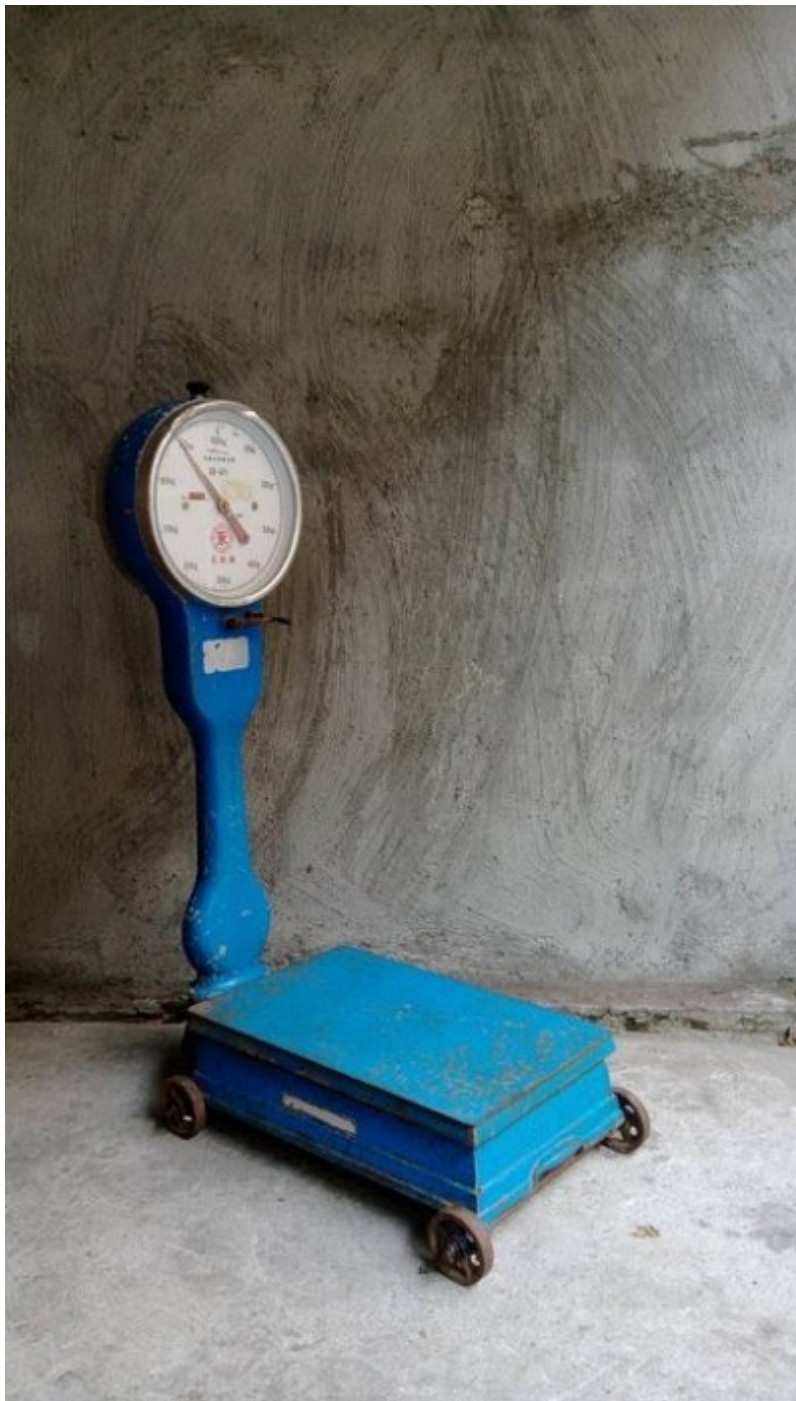

體重計

- 非常不同意
- 不同意
- 有點不同意
- 普通
- 有點同意
- 同意



非常同意

79. 對於這張圖片有熟悉感。 \*

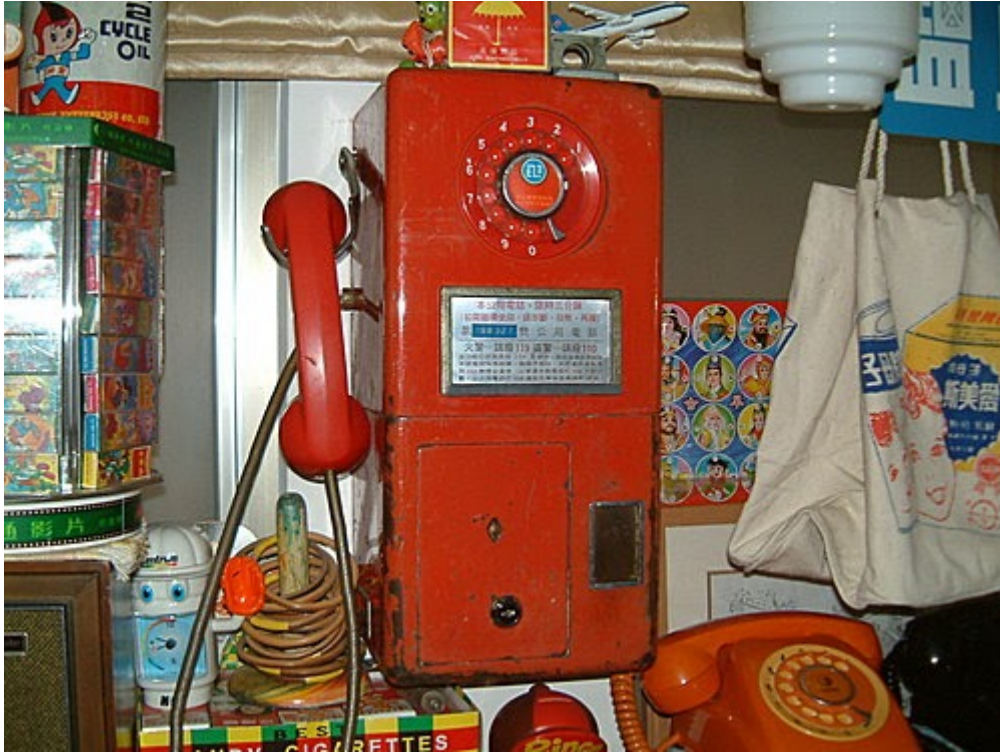

公用電話

- 非常不同意
- 不同意
- 有點不同意
- 普通
- 有點同意
- 同意
- 非常同意





80. 對於這張圖片有熟悉感。 \*

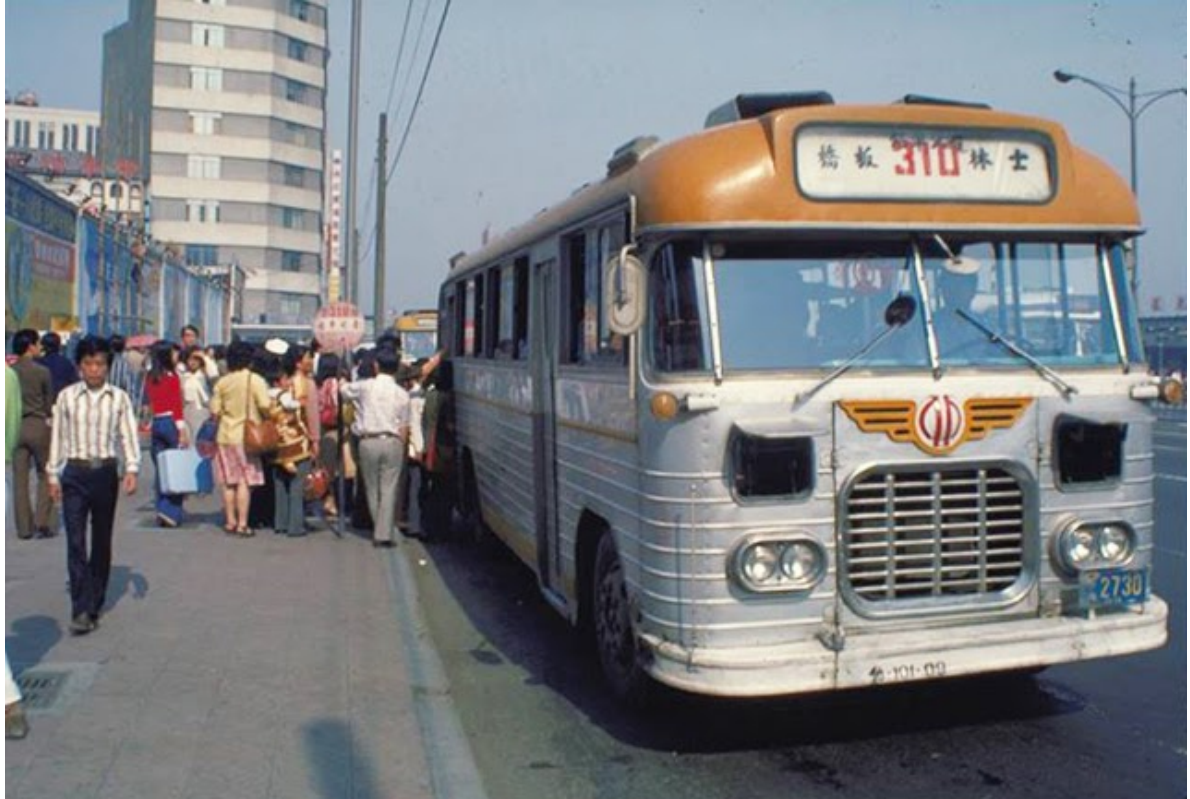

公車

- 非常不同意
- 不同意
- 有點不同意
- 普通
- 有點同意
- 同意
- 非常同意



81. 對於這張圖片有熟悉感。 \*

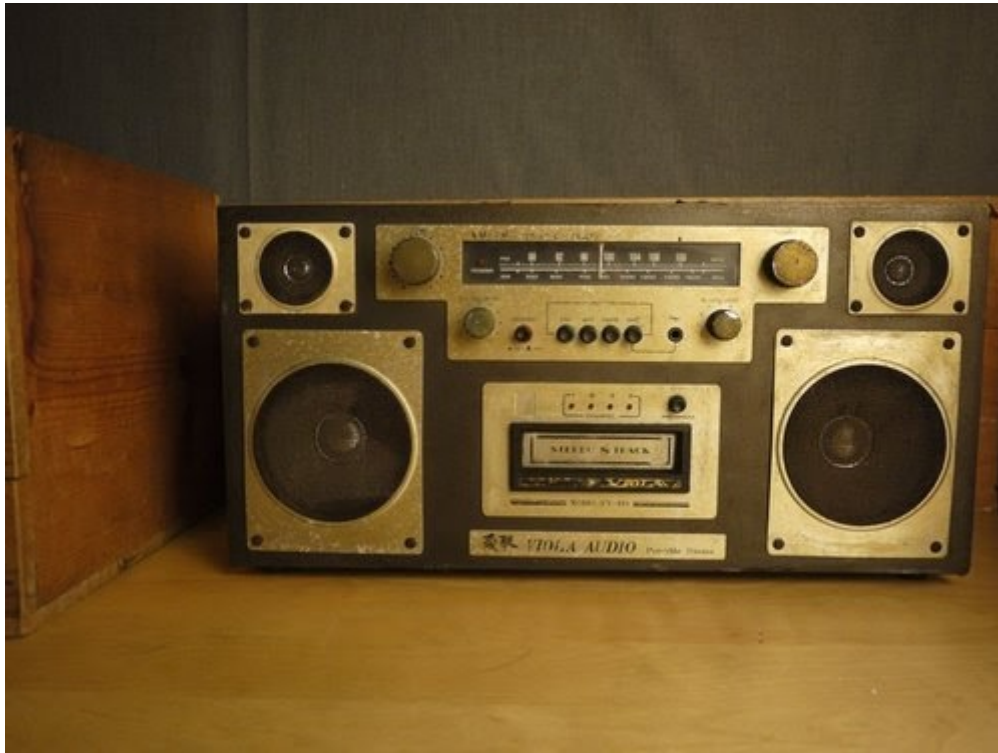

收音機

- 非常不同意
- 不同意
- 有點不同意
- 普通
- 有點同意
- 同意
- 非常同意

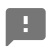

82. 對於這張圖片有熟悉感。 \*

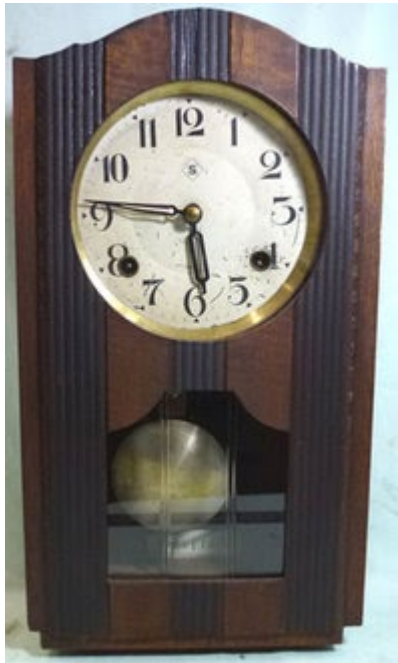

時鐘

- 非常不同意
- 不同意
- 有點不同意
- 普通
- 有點同意
- 同意
- 非常同意

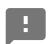

83. 對於這張圖片有熟悉感。 \*

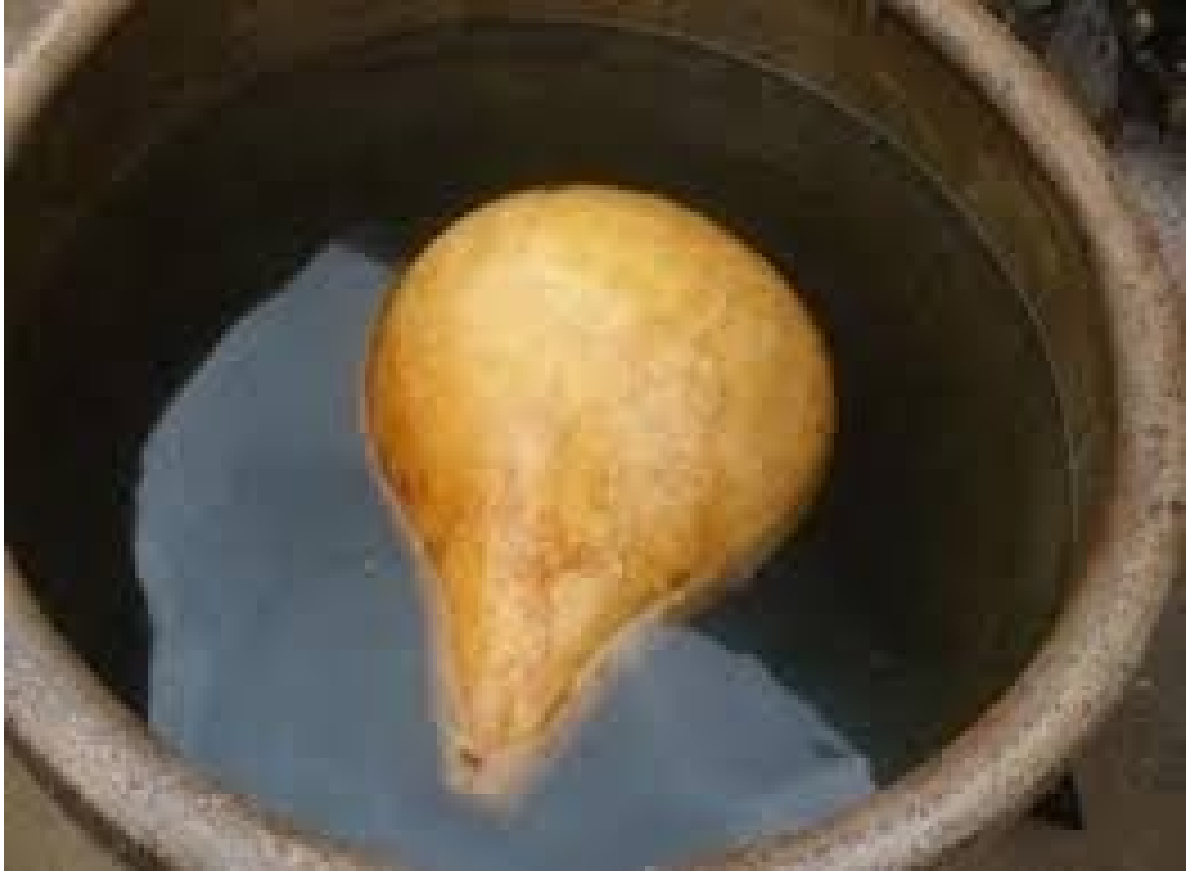

水瓢

- 非常不同意
- 不同意
- 有點不同意
- 普通
- 有點同意
- 同意
- 非常同意

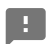



84. 對於這張圖片有熟悉感。 \*

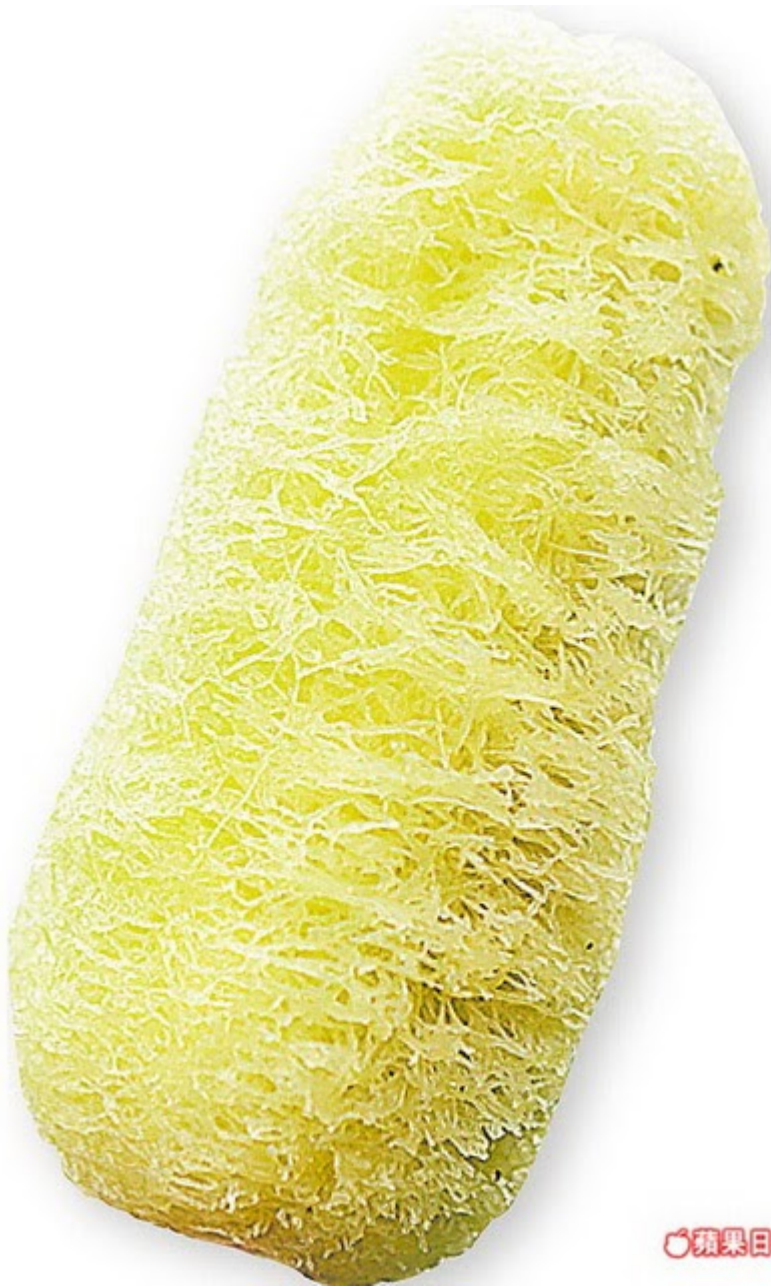

絲瓜布

- 非常不同意
- 不同意
- 有點不同意
- 普通
- 有點同意
- 同意
- 非常同意

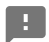

85. 對於這張圖片有熟悉感。 \*

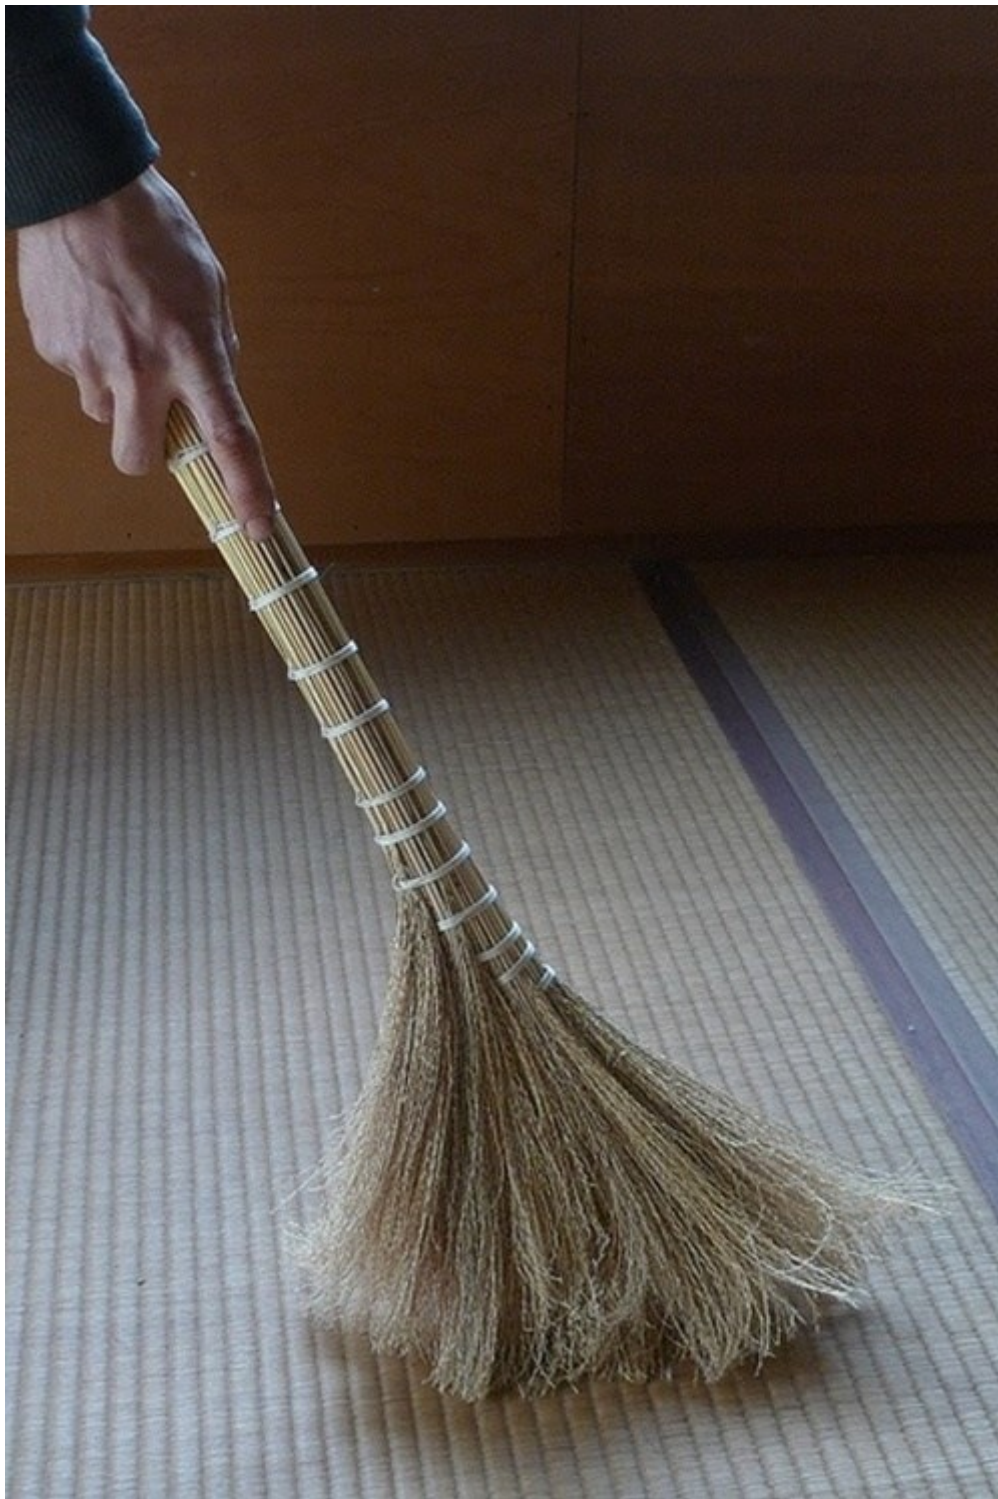

掃把

- 非常不同意
- 不同意
- 有點不同意
- 普通
- 有點同意

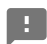

- 同意
- 非常同意

86. 對於這張圖片有熟悉感。 \*

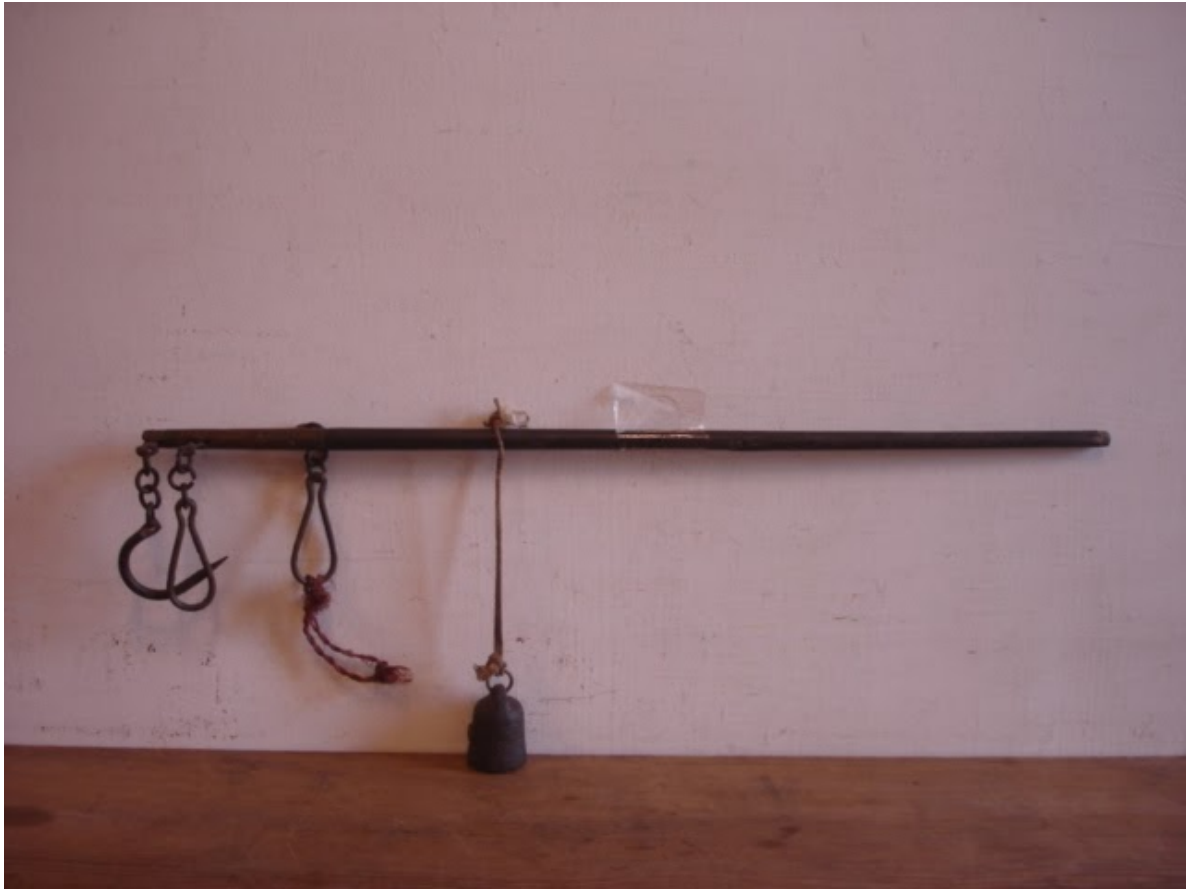

秤子

- 非常不同意
- 不同意
- 有點不同意
- 普通
- 有點同意
- 同意
- 非常同意

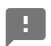



87. 對於這張圖片有熟悉感。 \*

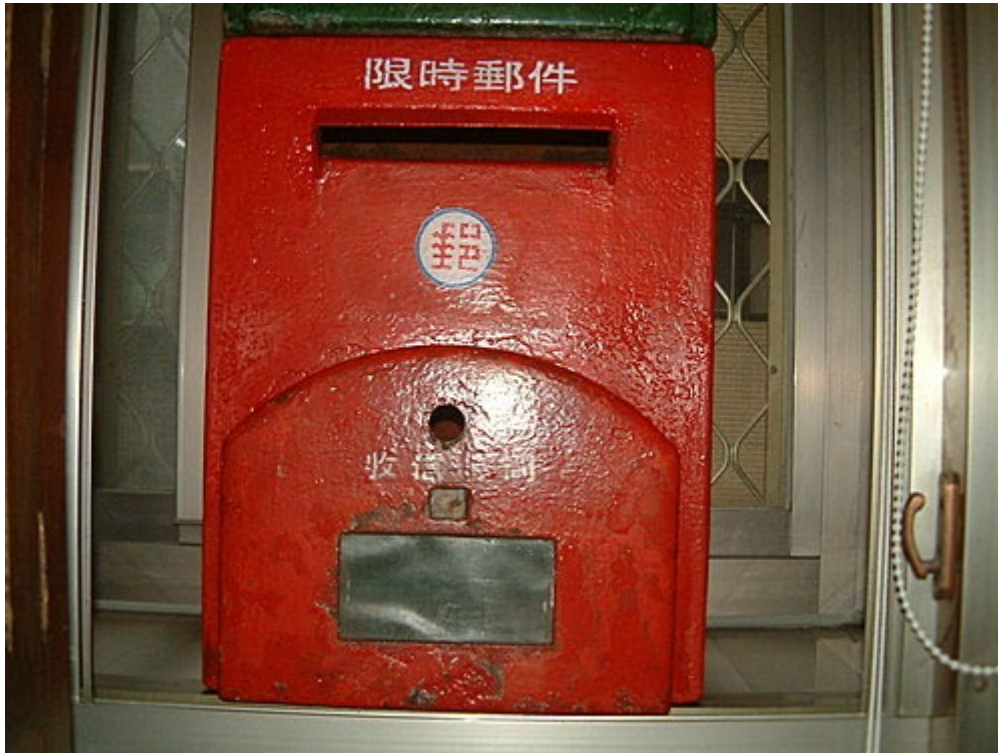

郵筒

- 非常不同意
- 不同意
- 有點不同意
- 普通
- 有點同意
- 同意
- 非常同意

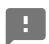



88. 對於這張圖片有熟悉感。 \*

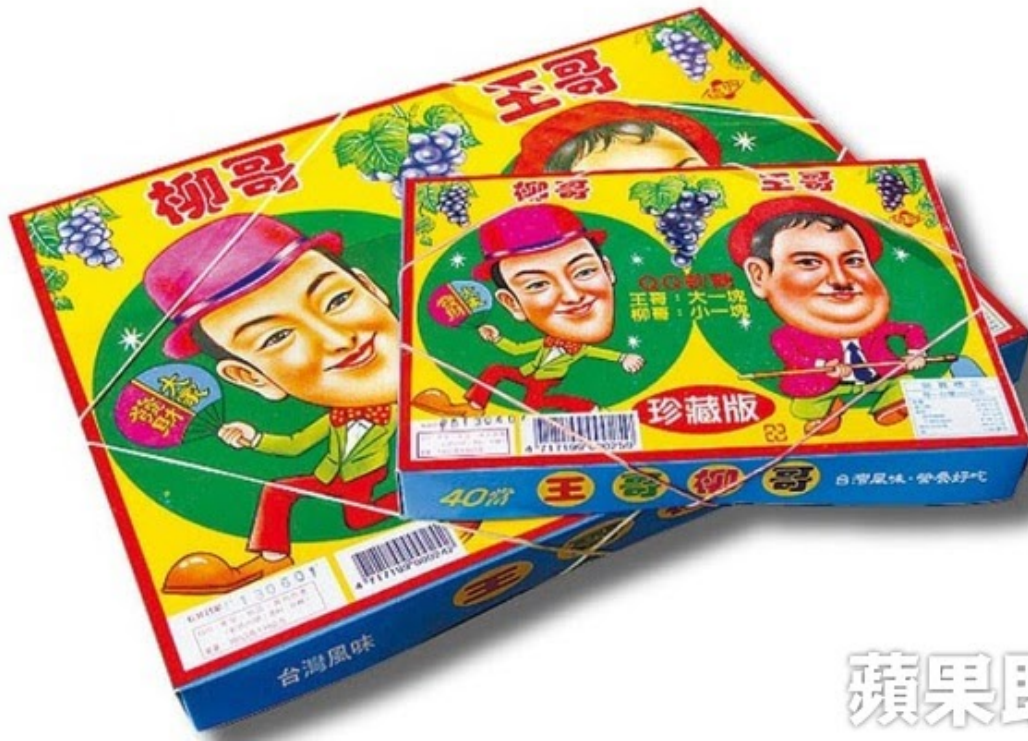

蘋果即時

軟糖

- 非常不同意
- 不同意
- 有點不同意
- 普通
- 有點同意
- 同意
- 非常同意



89. 對於這張圖片有熟悉感。 \*

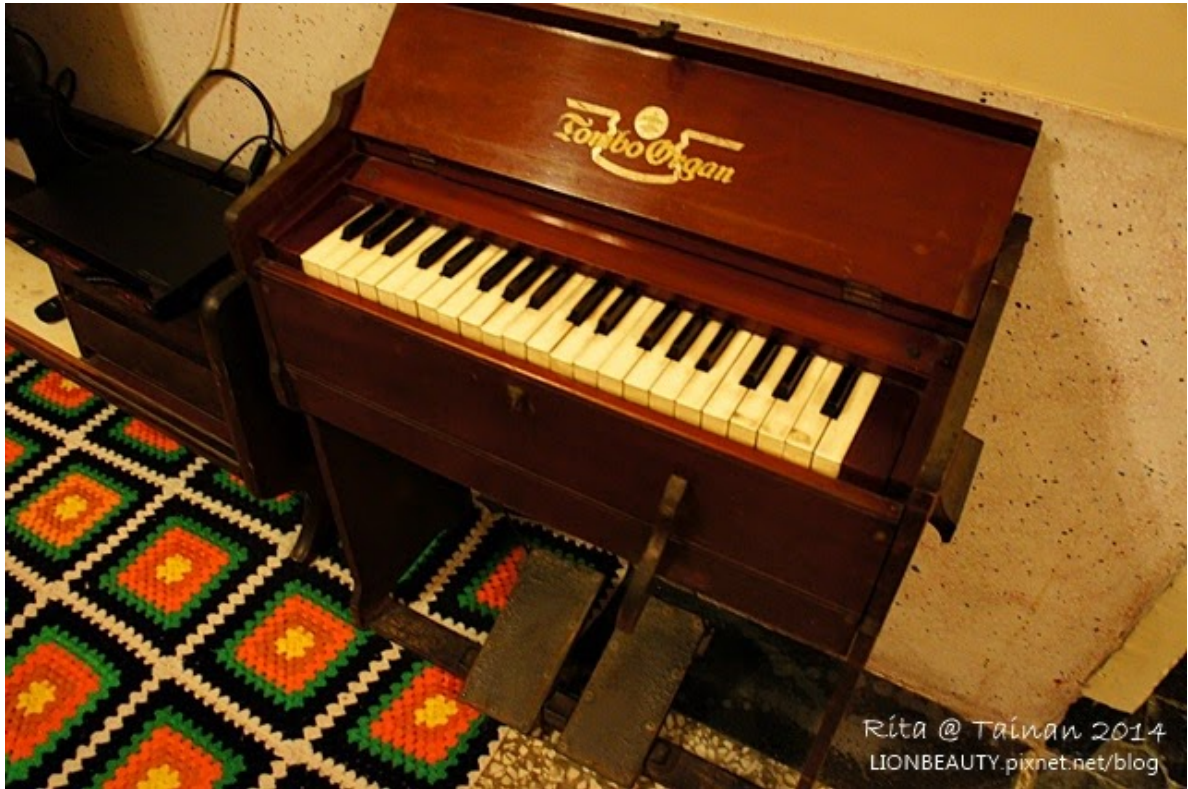

風琴

- 非常不同意
- 不同意
- 有點不同意
- 普通
- 有點同意
- 同意
- 非常同意



90. 對於這張圖片有熟悉感。 \*

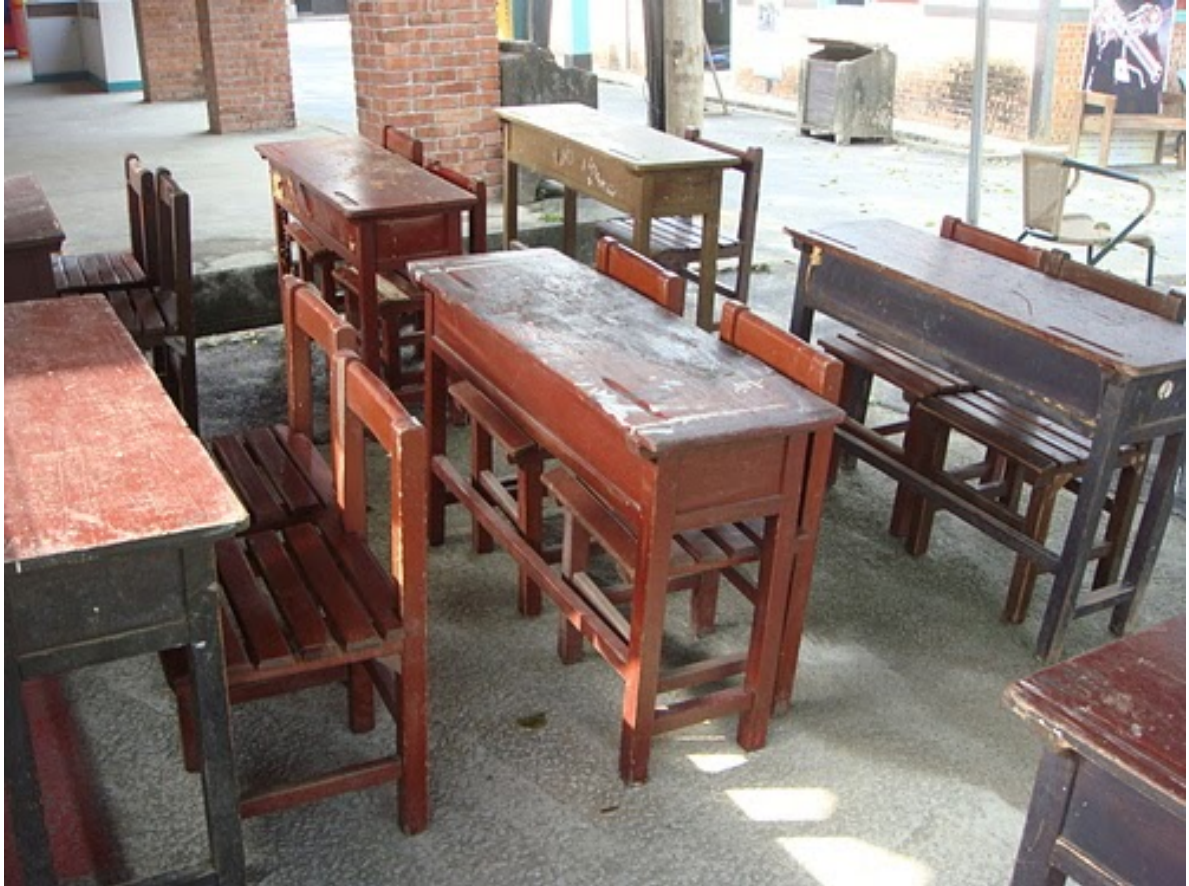

課桌椅

- 非常不同意
- 不同意
- 有點不同意
- 普通
- 有點同意
- 同意
- 非常同意



91. 對於這張圖片有熟悉感。 \*

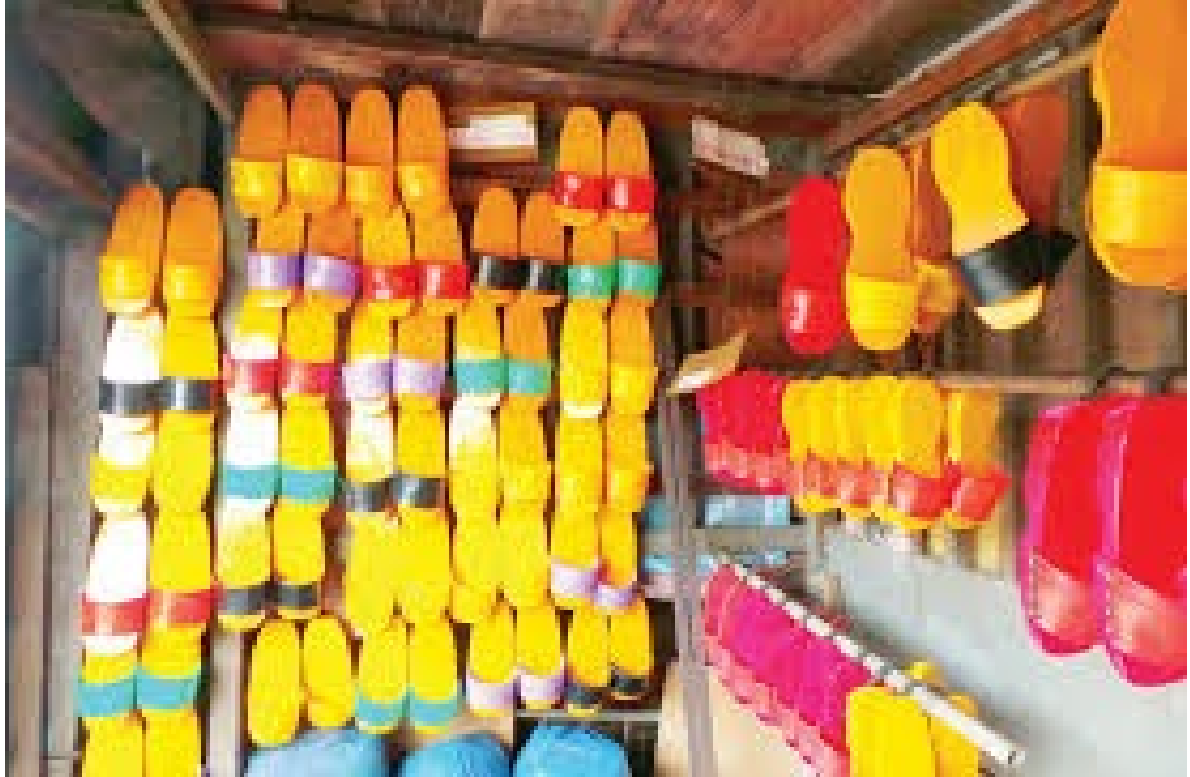

木屐

- 非常不同意
- 不同意
- 有點不同意
- 普通
- 有點同意
- 同意
- 非常同意





92. 對於這張圖片有熟悉感。 \*

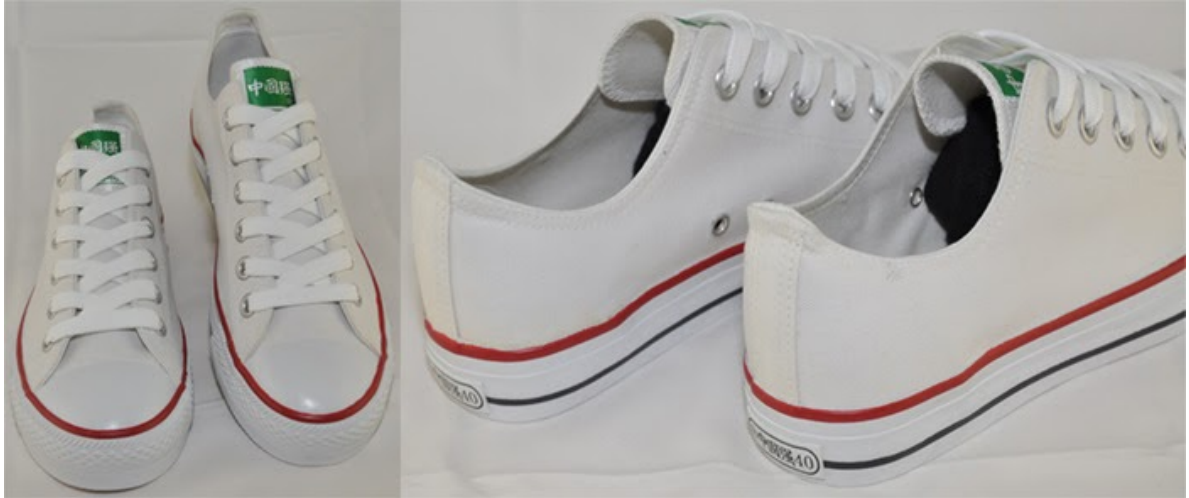

球鞋

- 非常不同意
- 不同意
- 有點不同意
- 普通
- 有點同意
- 同意
- 非常同意



93. 對於這張圖片有熟悉感。 \*

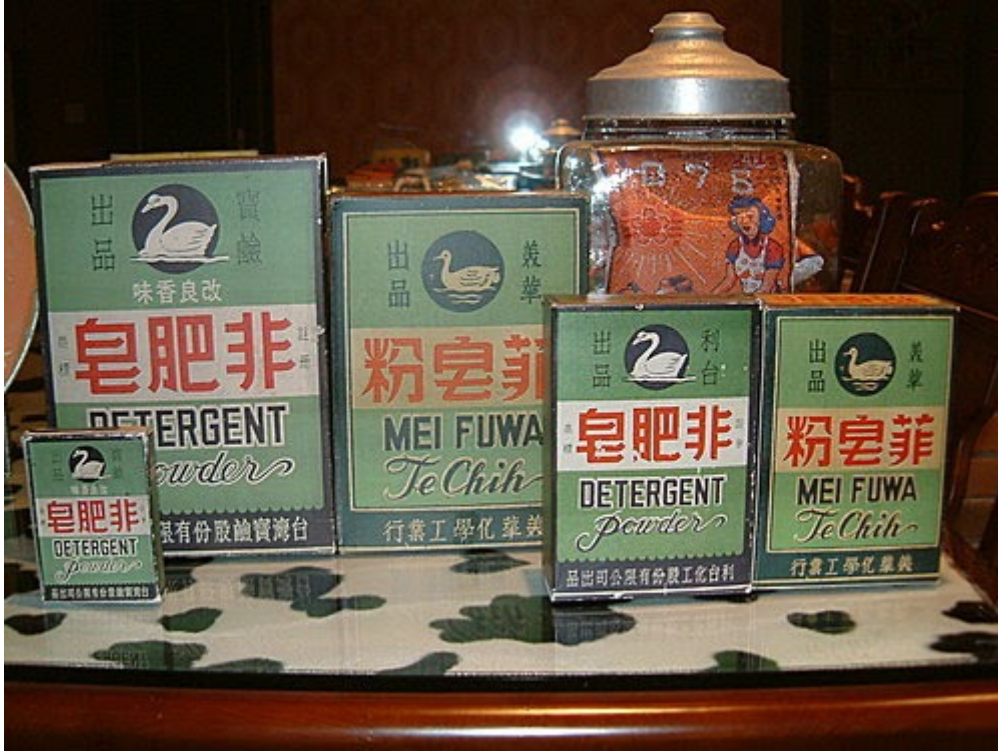

肥皂

- 非常不同意
- 不同意
- 有點不同意
- 普通
- 有點同意
- 同意
- 非常同意

其他對您來說有熟悉感的物品? (限60年代) \*

您的回答

問卷到此結束! 感謝您的耐心回答! 敬祝 快樂如意!

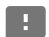

提交

請勿利用 Google 表單送出密碼。

這份表單是在 大同大學 中建立。 [檢舉濫用情形](#)

Google 表單

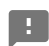

Supplement: games_v8i4e22007_app1.pdf [file games_v8i4e22007_app1.pdf]
