# Supplementary material for: A Cognitive-Based Board Game With Augmented Reality for Older Adults: Development and Usability Study
Source: PubMed Central journal article supplement (PMC7769693; doi:10.2196/22007), 2020-12-14

# Survey on Impressions of the 1960s

Dear friends,

Thank you for taking the time to fill out this questionnaire. This survey is used to study the impressions of the 1960s in 50 to 59 year olds. The survey is anonymous. The information you provide will only be used for academic purposes, and will not be shared. We value your opinion and hope you can fill out the survey based on your honest opinions. Thank you for your support!

\*必填

## Basic Information

Sex \*

- Male
- Female

Education Level \*

- Less than Jr High School
- High School
- Bachelors or Associates Degree
- Graduate Degree

Age \*

您的回答

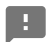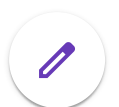

Occupation \*

您的回答

Your impressions of the 1960's

1. Please rate your familiarity with this image \*

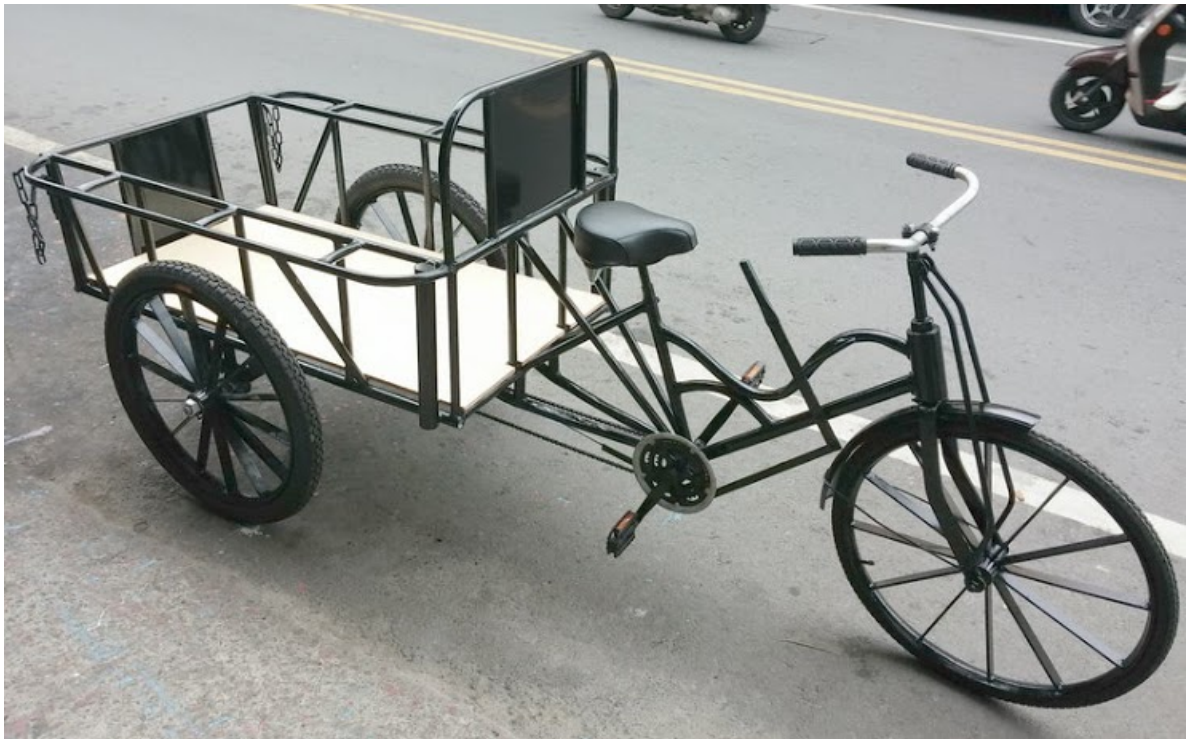

Tricycle

- Strongly disagree
- Disagree
- Slightly disagree
- Neutral
- Slightly agree
- agree
- Strongly agree

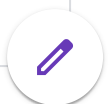

2. Please rate your familiarity with this image. \*

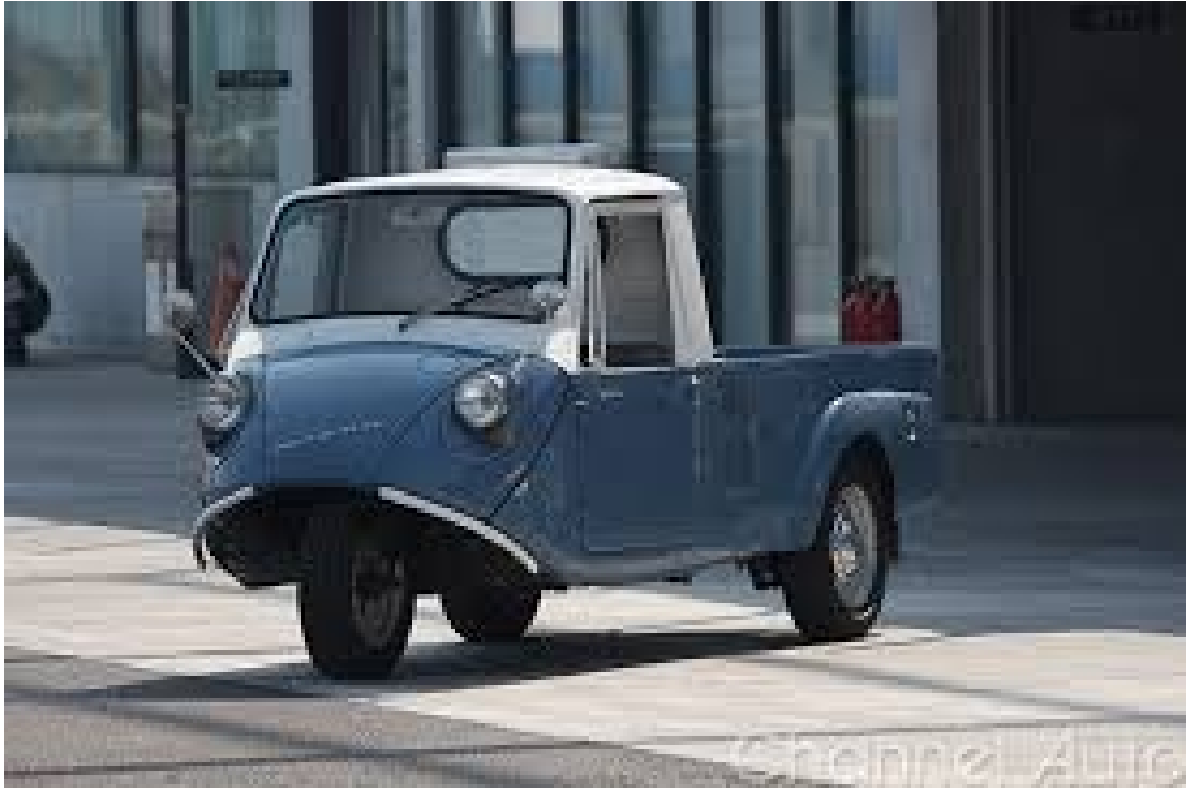

Three-wheeled truck

- Strongly disagree
- Slightly disagree
- Neutral
- Slightly agree
- Agree
- Strongly agree

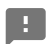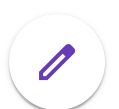

3. Please rate your familiarity with this image. \*

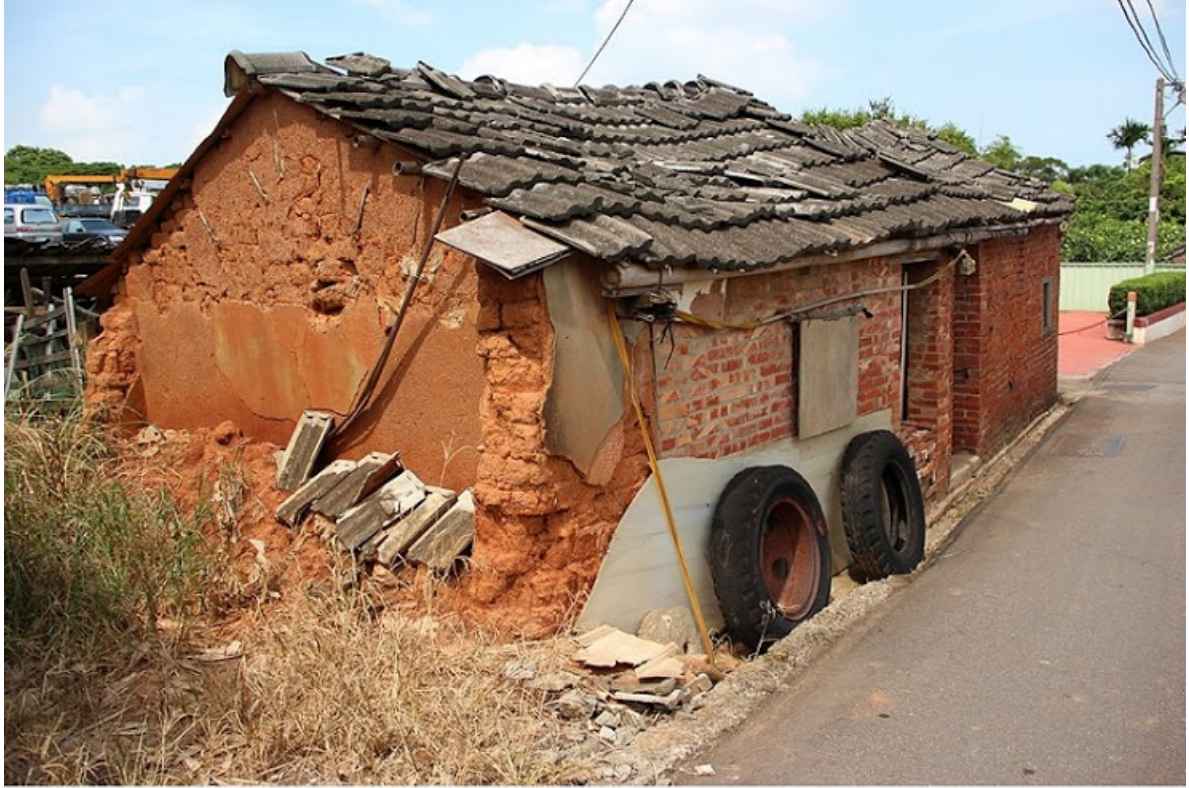

MissRita | ritall836.pixnet.net/blog

Traditional rammed-earth house

- Strongly disagree
- Disagree
- Slightly disagree
- Neutral
- Slightly agree
- Agree
- Strongly agree

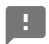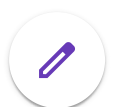



4. Please rate your familiarity with this image. \*

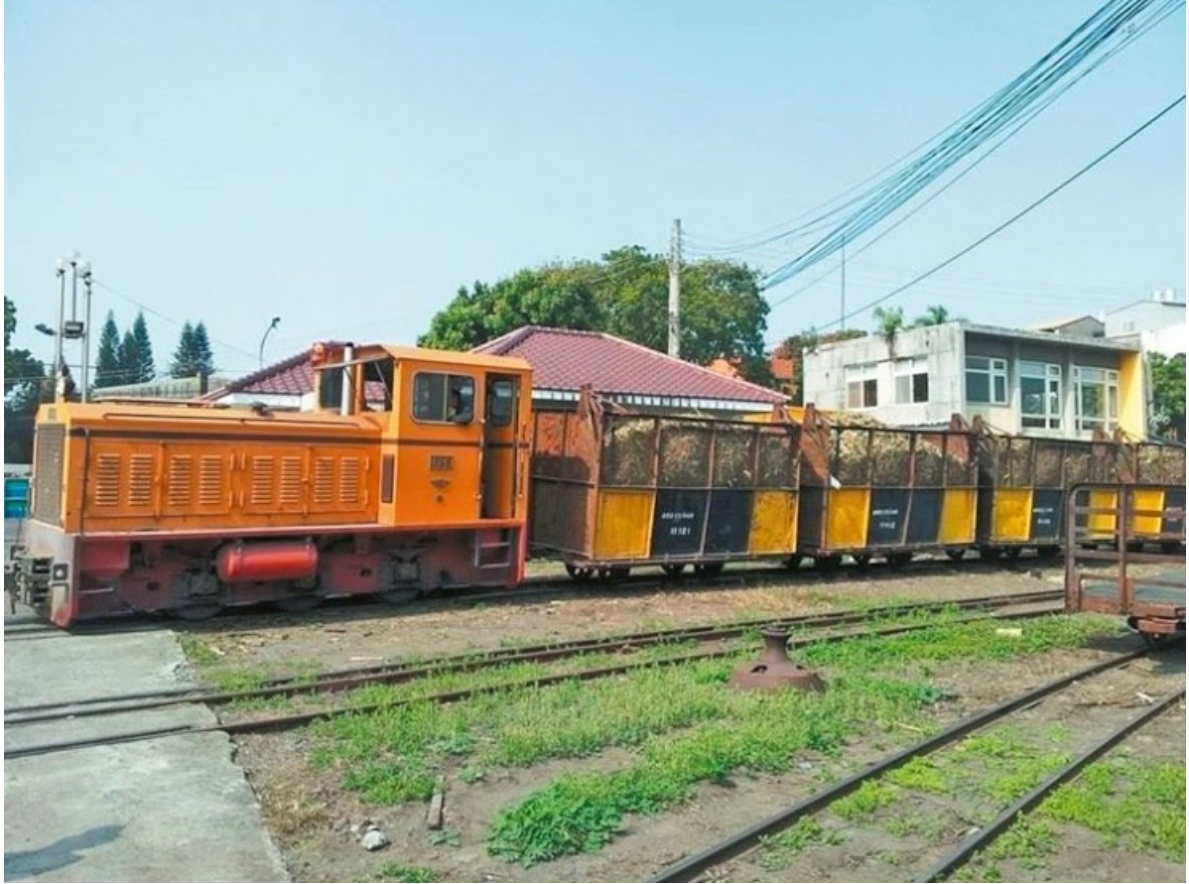

Taiwan Sugar Railways

- Strongly disagree
- Disagree
- Slightly disagree
- Neutral
- Slightly agree
- Agree
- Strongly agree

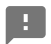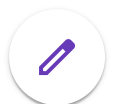

5. Please rate your familiarity with this image. \*

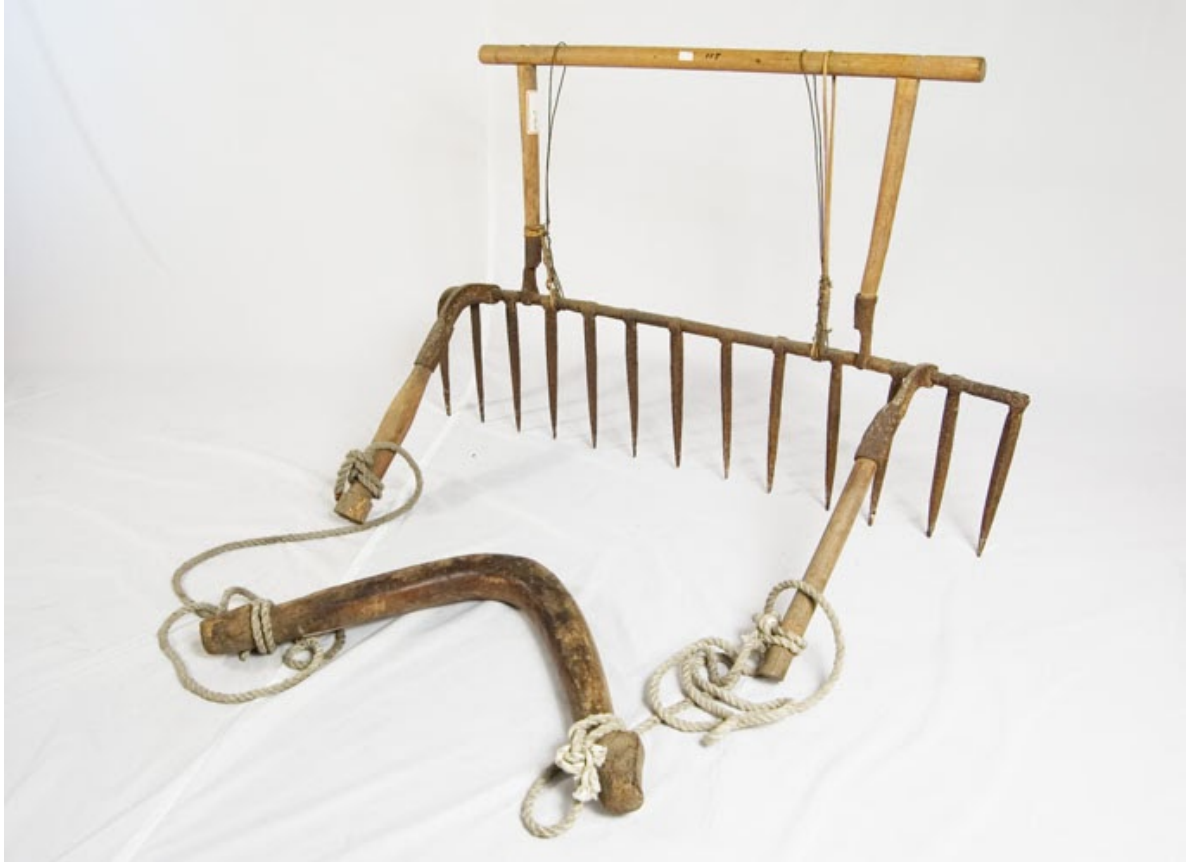

Hand rake

- Strongly disagree
- Disagree
- Slightly disagree
- Neutral
- Slightly agree
- Agree
- Strongly agree

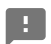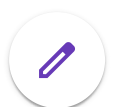

6. Please rate your familiarity with this image. \*

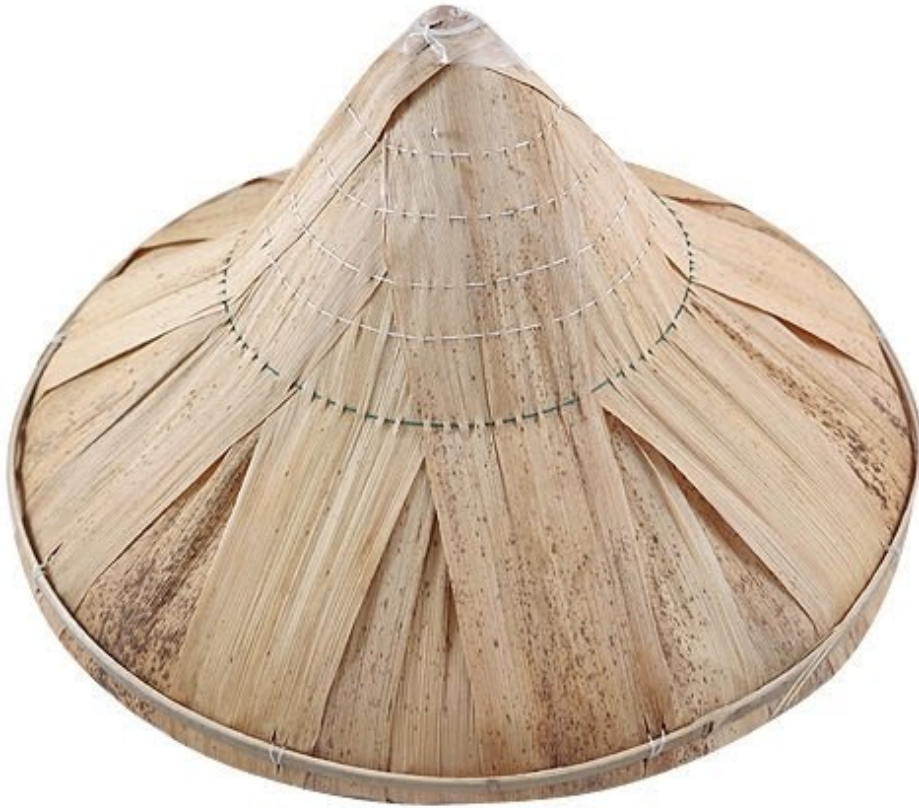

Asian conical hat

- Strongly disagree
- Disagree
- Slightly disagree
- Neutral
- Slightly agree
- Agree
- Strongly agree

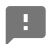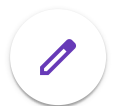

7. Please rate your familiarity with this image. \*

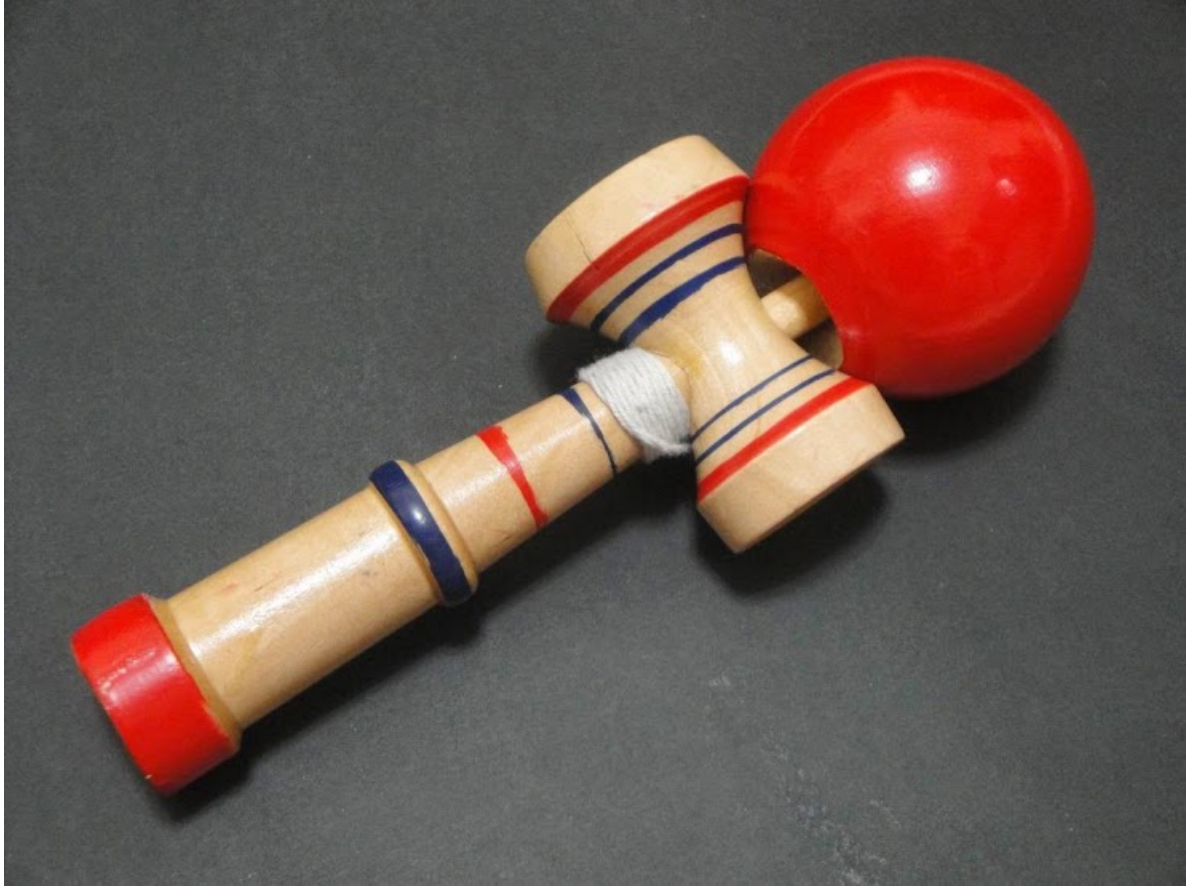

Kendama (Japanese cup-and-ball game)

- Strongly disagree
- Disagree
- Slightly disagree
- Neutral
- Slightly agree
- Agree
- Strongly agree

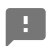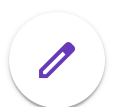



8. Please rate your familiarity with this image. \*

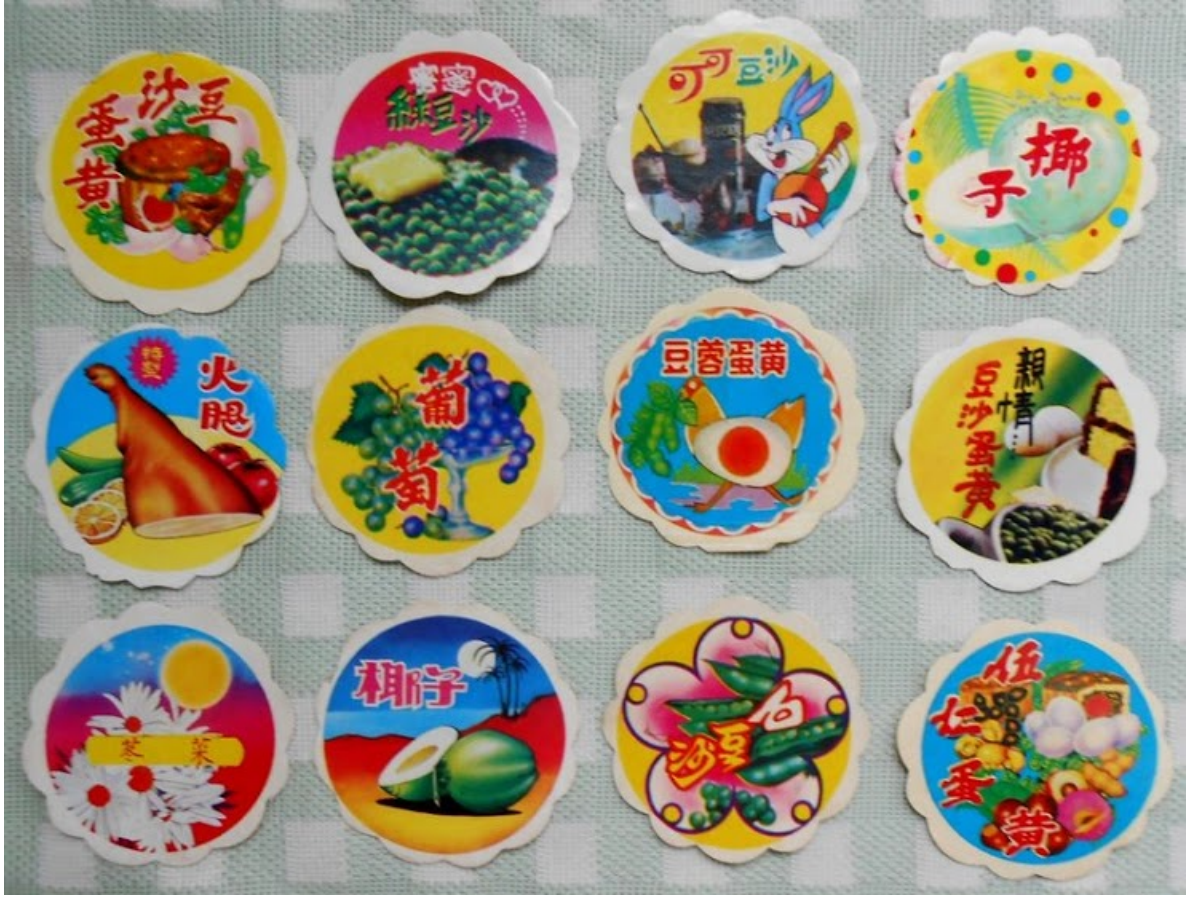

Mooncake labels

- Strongly disagree
- Disagree
- Slightly disagree
- Neutral
- Slightly agree
- Agree
- Strongly agree

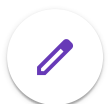

9. Please rate your familiarity with this image. \*

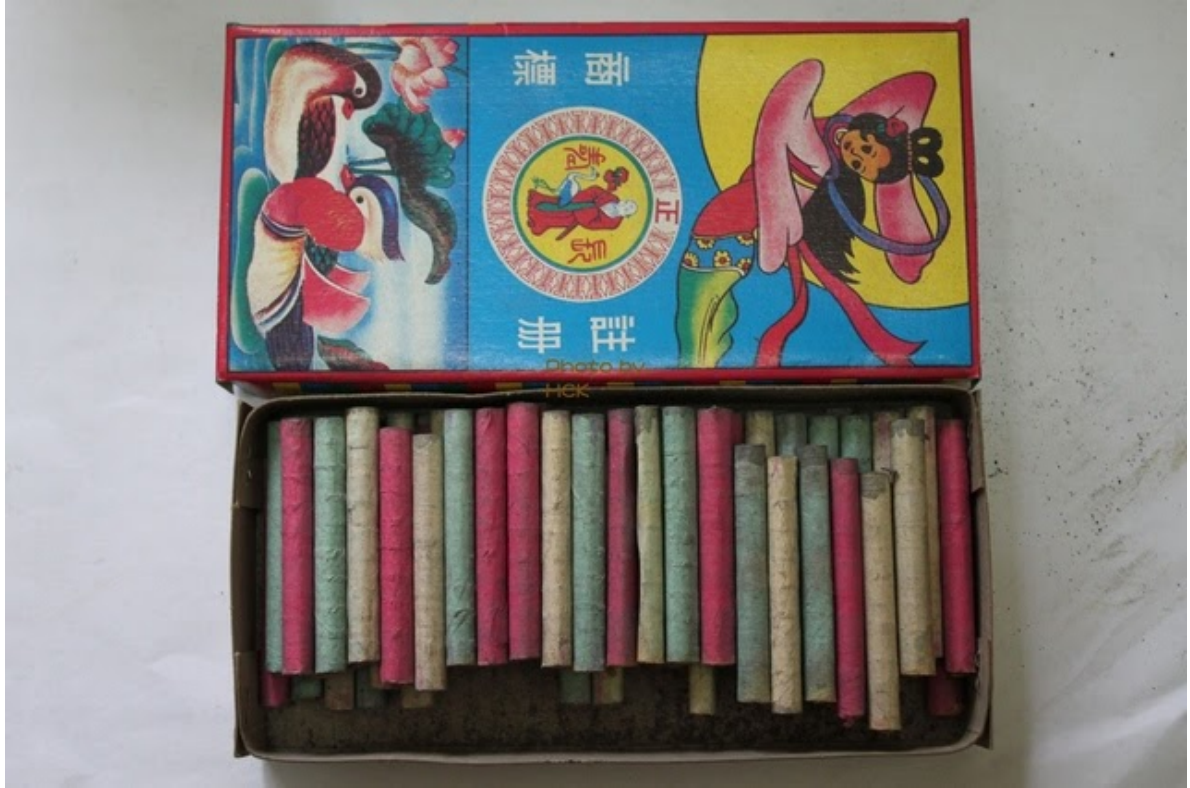

Firecracker

- Strongly disagree
- Disagree
- Slightly disagree
- Neutral
- Slightly agree
- Agree
- Strongly agree

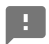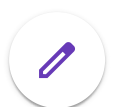

10. Please rate your familiarity with this image. \*

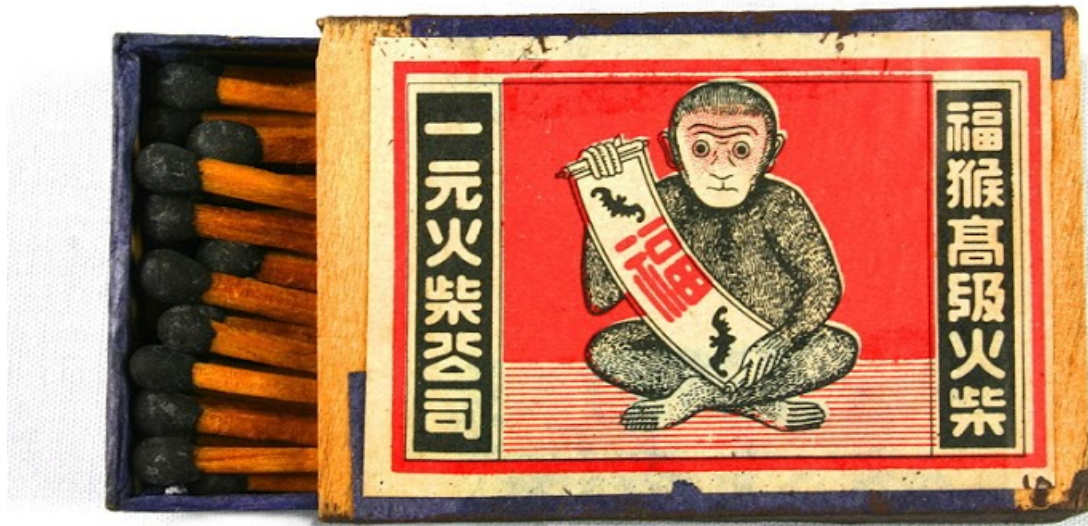

Matchbox

- Strongly disagree
- Disagree
- Slightly disagree
- Neutral
- Slightly agree
- Agree
- Strongly agree

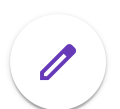



11. Please rate your familiarity with this image. \*

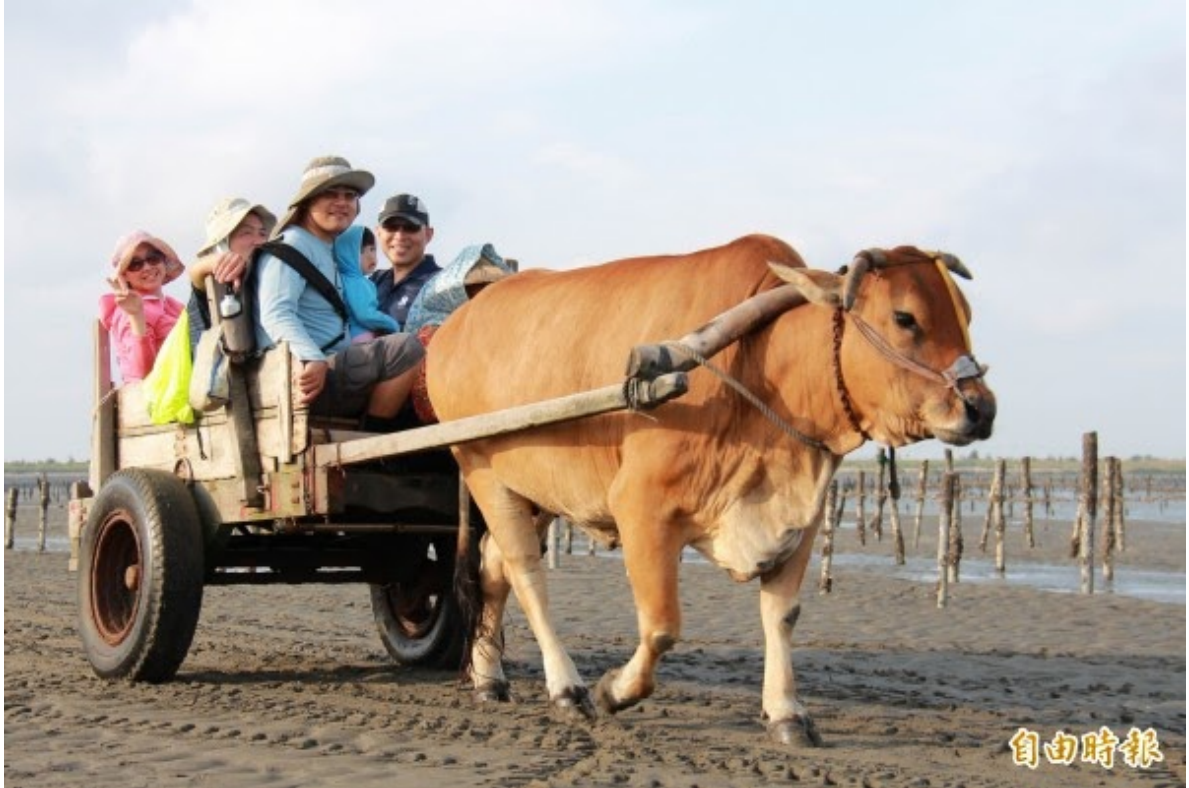

Ox cart

- Strongly disagree
- Disagree
- Slightly disagree
- Neutral
- Slightly agree
- Agree
- Strongly agree

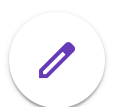



12. Please rate your familiarity with this image. \*

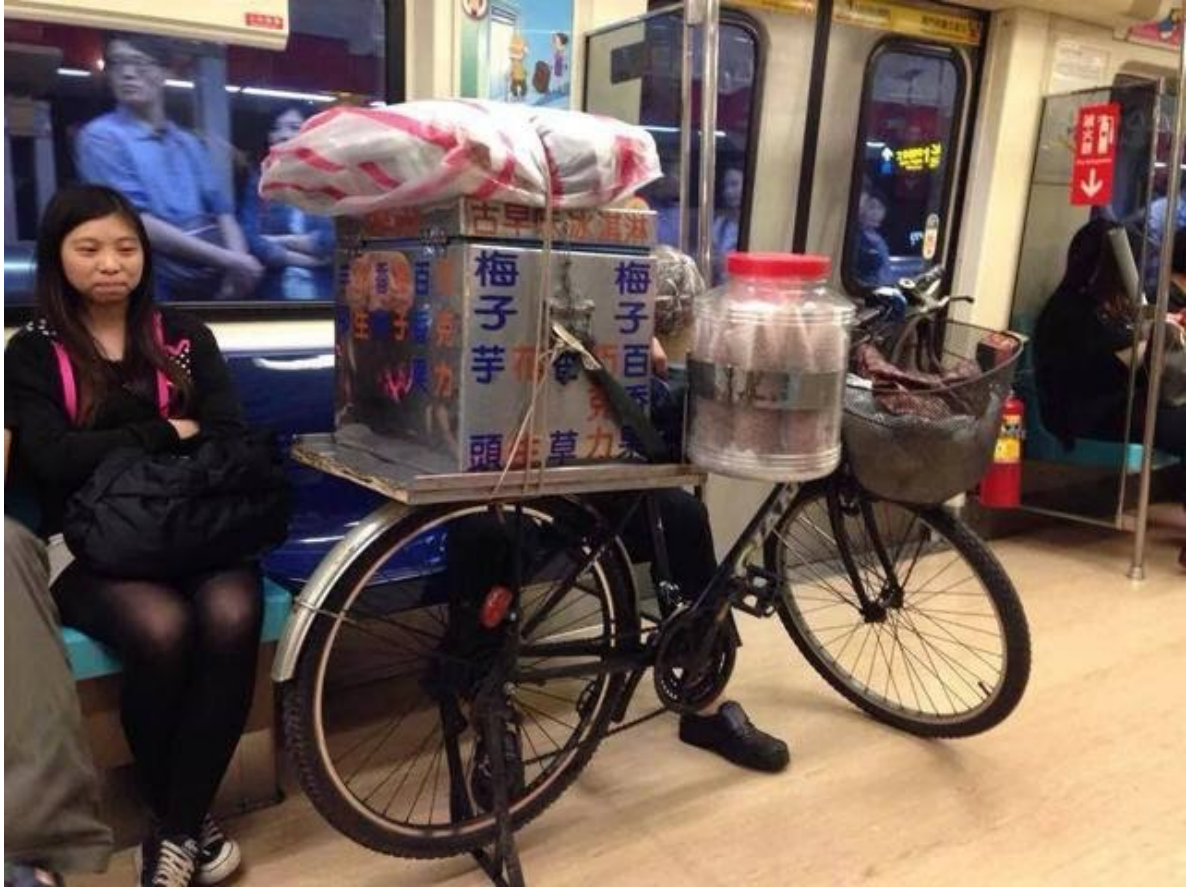

Ice cream cart

- Strongly disagree
- Disagree
- Slightly disagree
- Neutral
- Slightly agree
- Agree
- Strongly agree

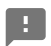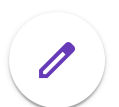

13. Please rate your familiarity with this image. \*

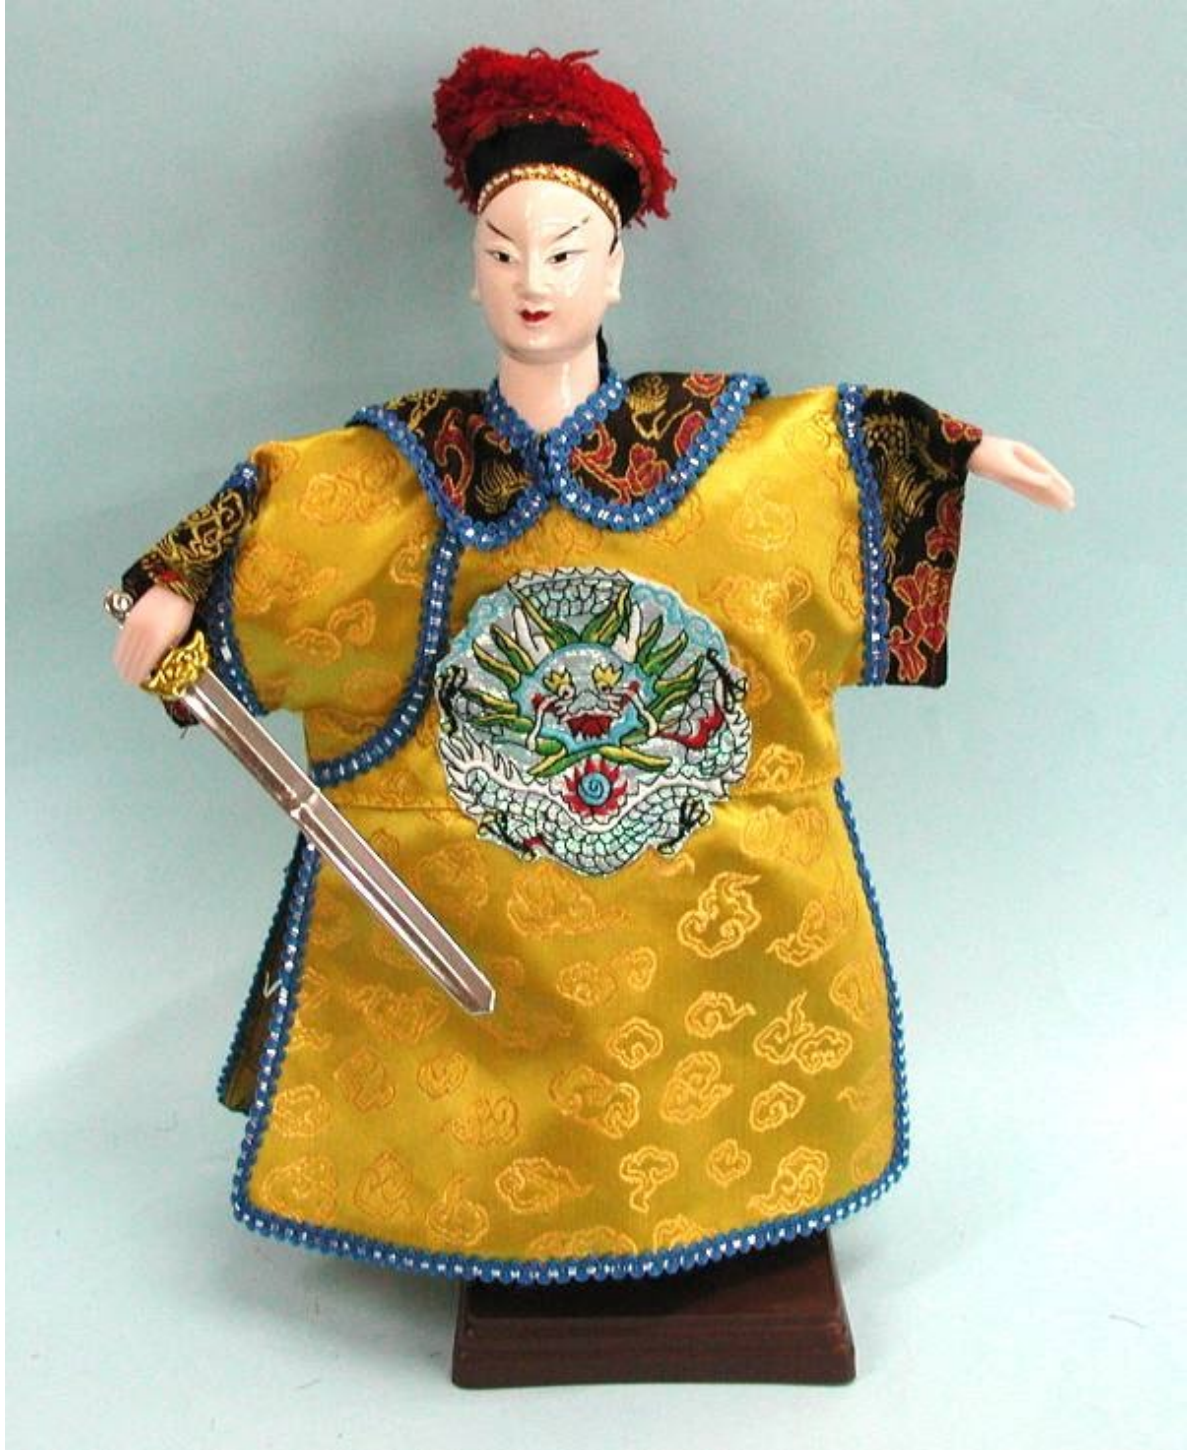

Glove puppetry puppet

- Strongly disagree
- Disagree
- Slightly disagree
- Neutral
- Slightly agree
- Agree

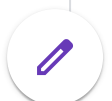



- Agree
- Strongly agree

14. Please rate your familiarity with this image. \*

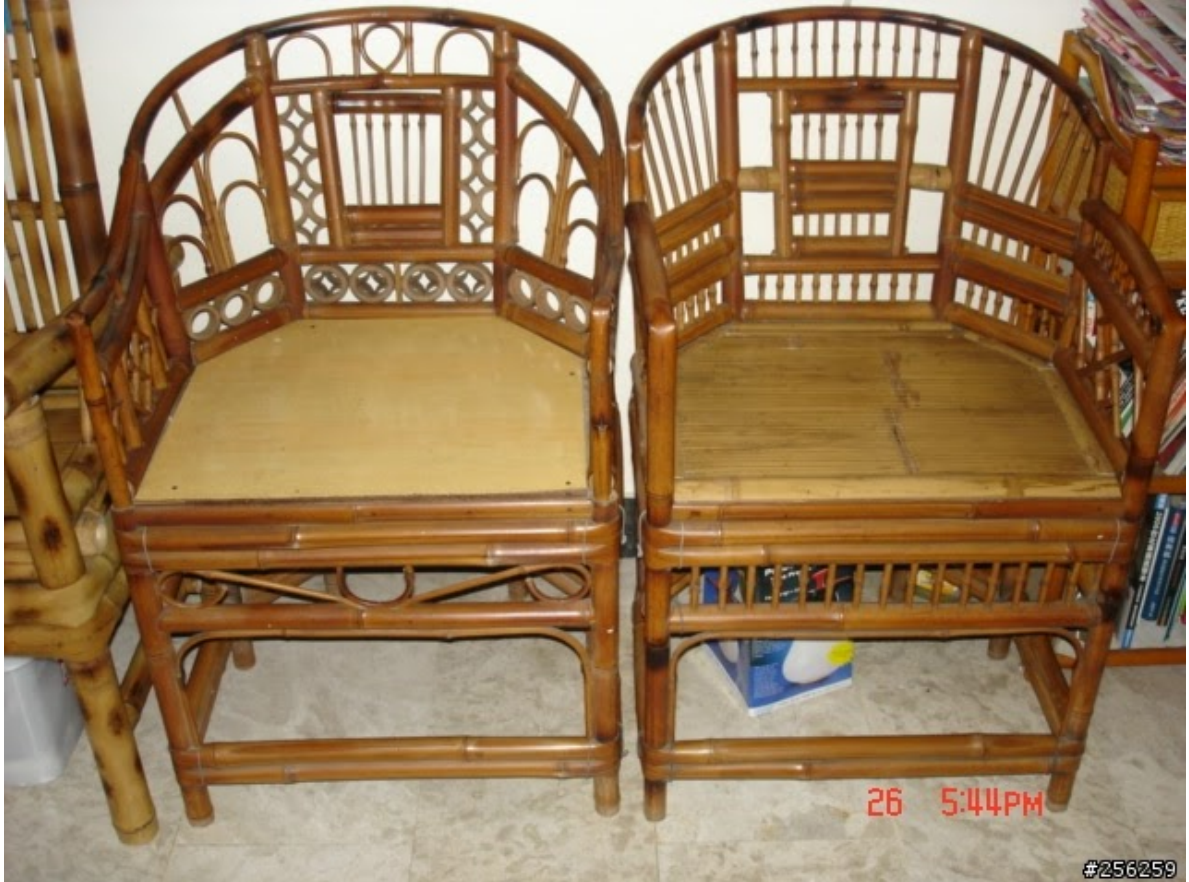

Bamboo chairs

- Strongly disagree
- Disagree
- Slightly disagree
- Neutral
- Slightly agree
- Agree
- Strongly agree

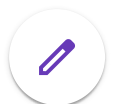

15. Please rate your familiarity with this image. \*

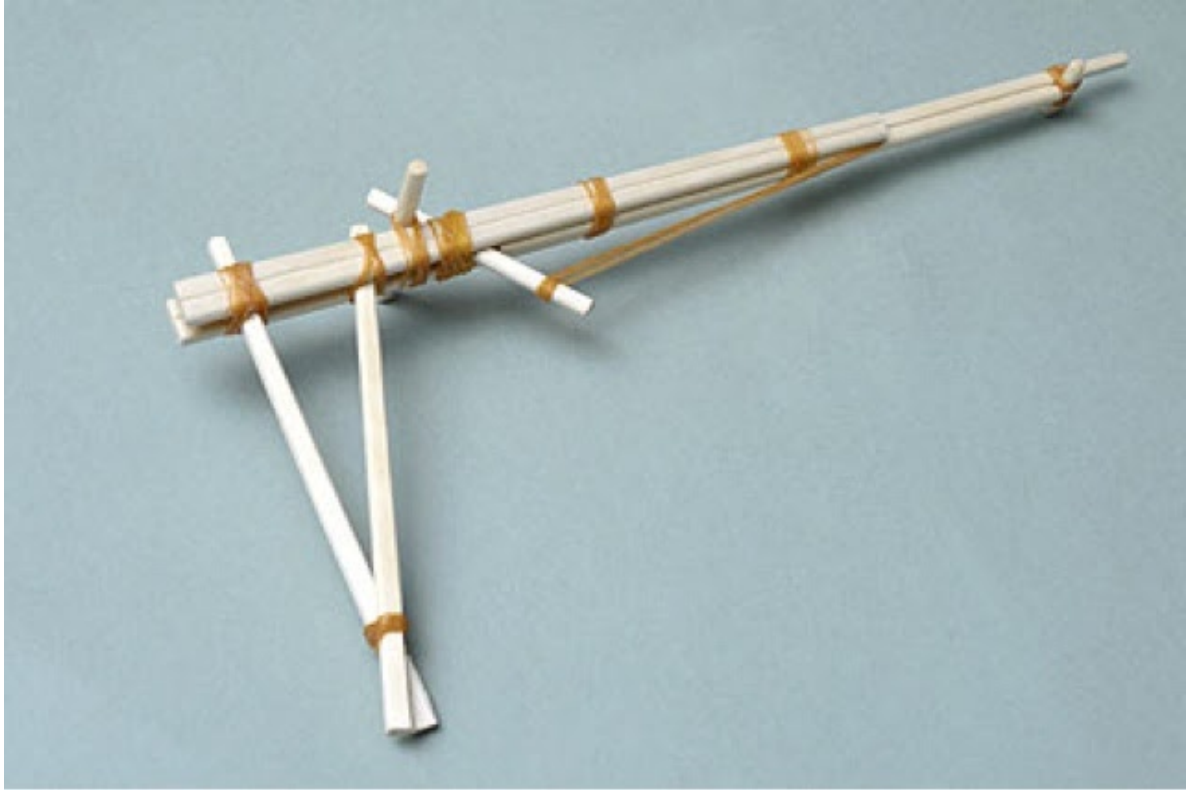

Bamboo toy gun

- Strongly disagree
- Disagree
- Slightly disagree
- Neutral
- Slightly agree
- Agree
- Strongly agree

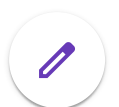



16. 15. Please rate your familiarity with this image. \*

红动中国WWW.REDOCN.COM

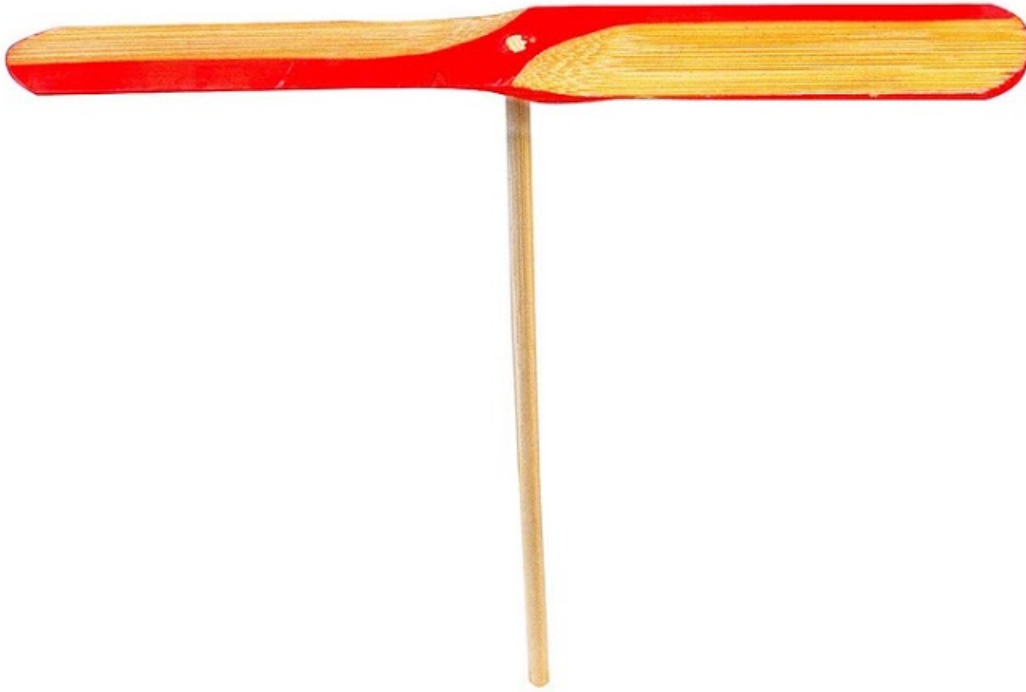

编号 : 753063 红动中国 (www.redocn.com) opear

Bamboo-copter

- Strongly disagree
- Disagree
- Slightly disagree
- Neutral
- Slightly agree
- Agree
- Strongly agree

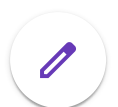

17. Please rate your familiarity with this image. \*

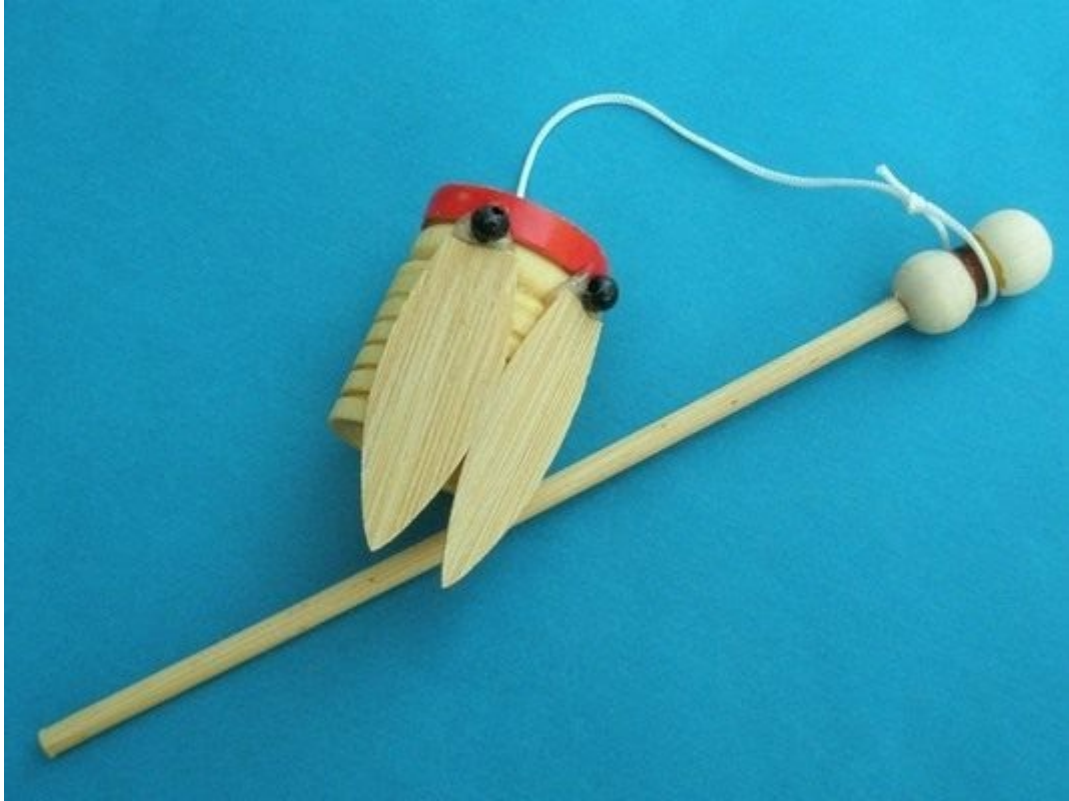

Bamboo ciacda toy

- Strongly disagree
- Disagree
- Slightly disagree
- Neutral
- Slightly agree
- Agree
- Strongly agree

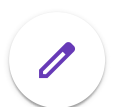

18. Please rate your familiarity with this image. \*

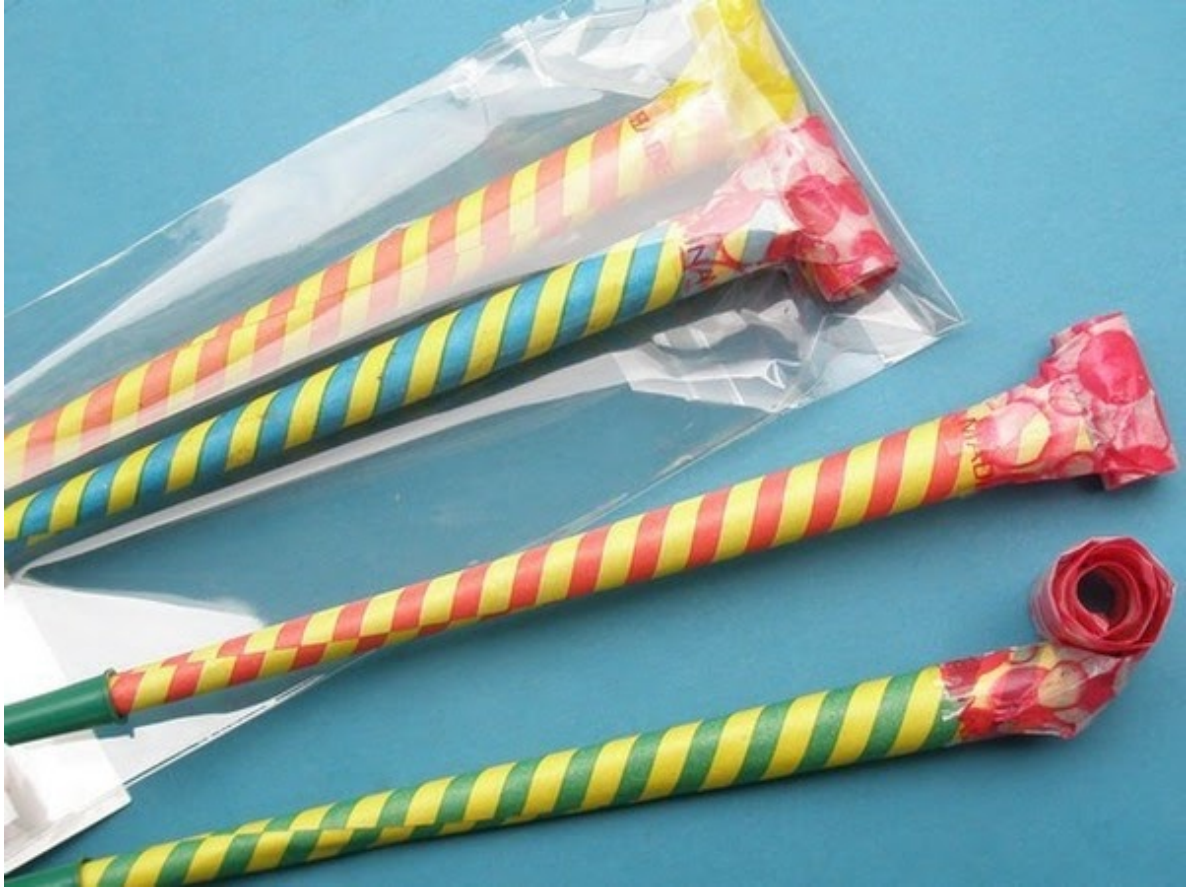

Party blowouts

- Strongly disagree
- Disagree
- Slightly disagree
- Neutral
- Slightly agree
- Agree
- Strongly agree

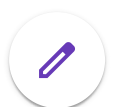

19. Please rate your familiarity with this image. \*

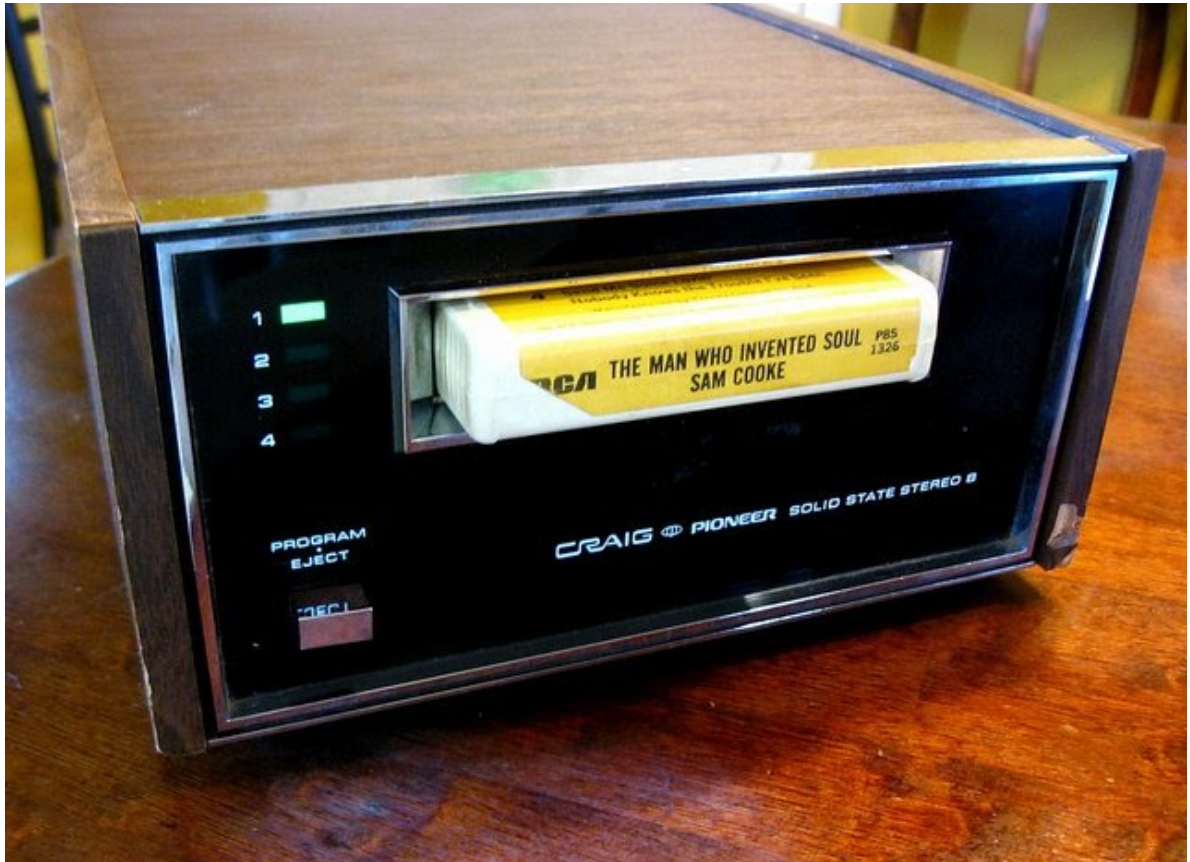

Cassette tapes

- Strongly disagree
- Disagree
- Slightly disagree
- Neutral
- Slightly agree
- Agree
- Strongly agree

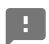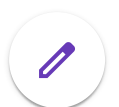





21. Please rate your familiarity with this image. \*

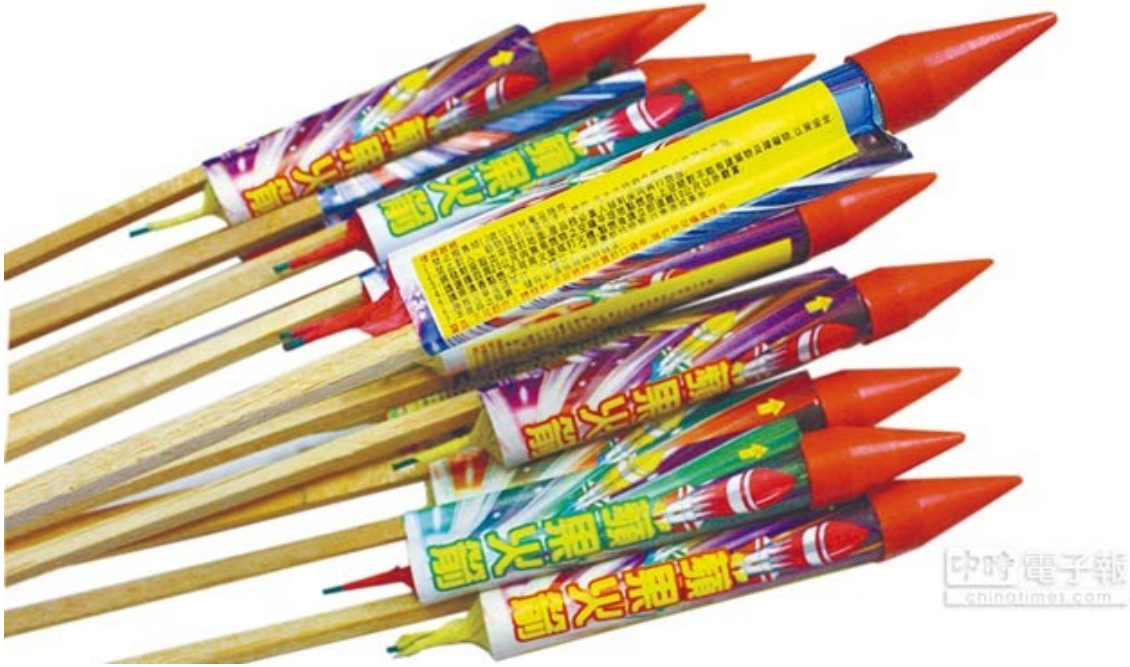

Skyrocket

- Strongly disagree
- Disagree
- Slightly disagree
- Neutral
- Slightly agree
- Agree
- Strongly agree

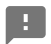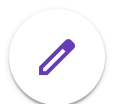

22. Please rate your familiarity with this image. \*

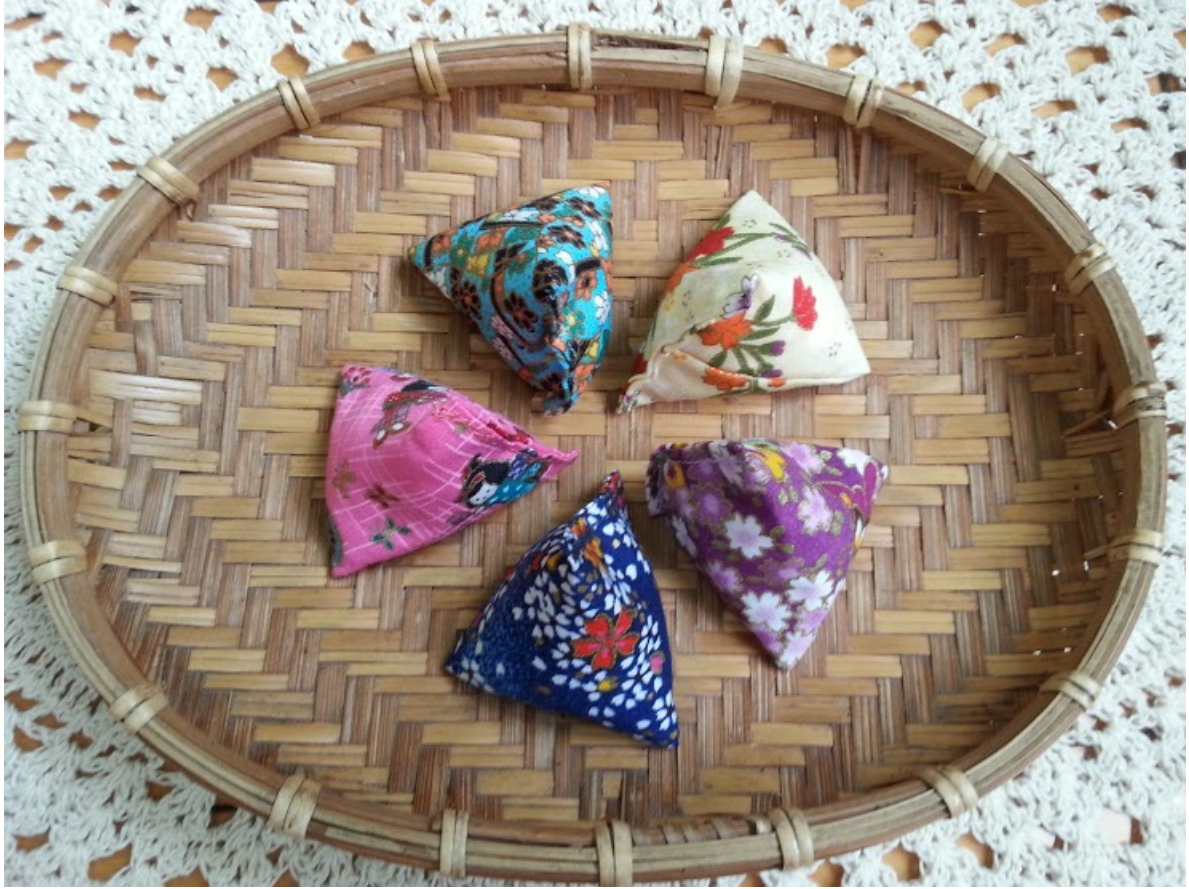

Toy sandbags

- Strongly disagree
- Disagree
- Slightly disagree
- Neutral
- Slightly agree
- Agree
- Strongly agree

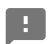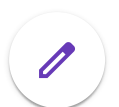



23. Please rate your familiarity with this image. \*

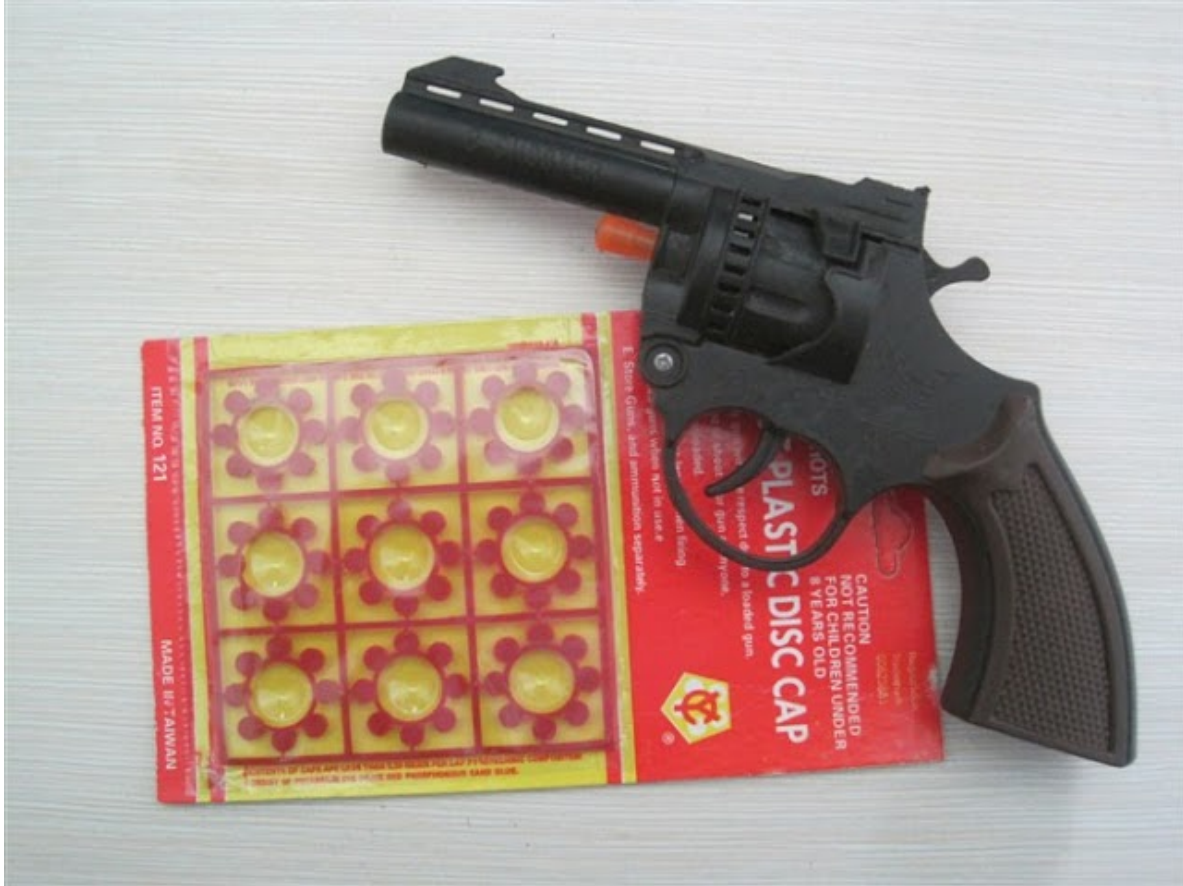

BB guns

- Strongly disagree
- Disagree
- Slightly disagree
- Neutral
- Slightly agree
- Agree
- Strongly agree

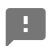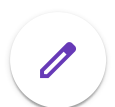



24. Please rate your familiarity with this image. \*

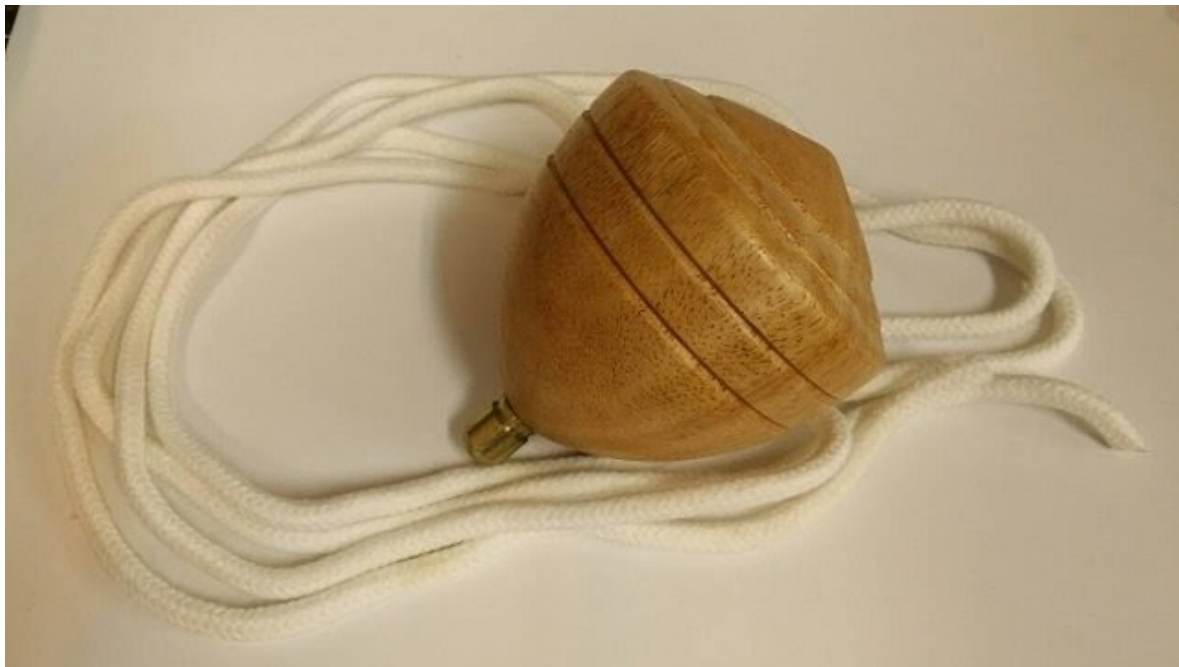

Spinning top

- Strongly disagree
- Disagree
- Slightly disagree
- Neutral
- Slightly agree
- Agree
- Strongly agree

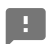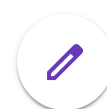

25. Please rate your familiarity with this image. \*

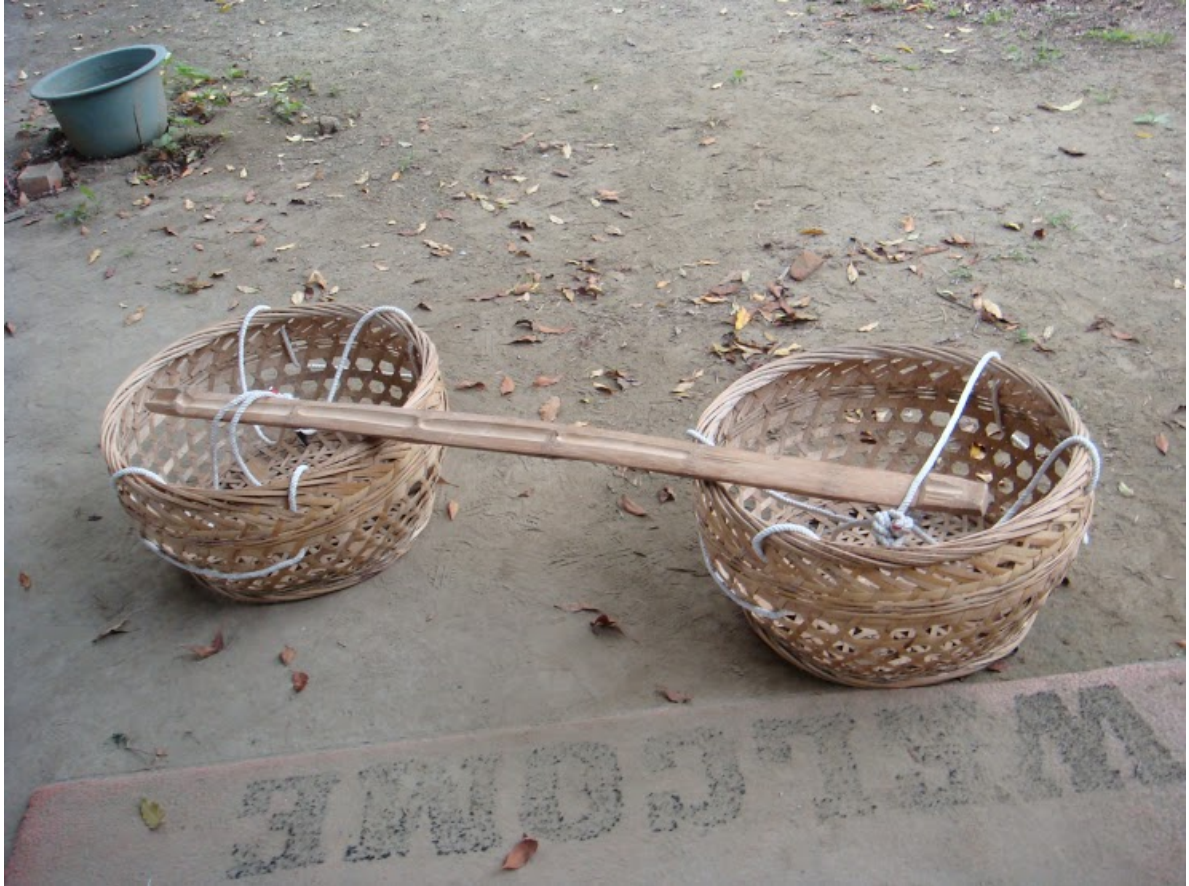

Shoulder pole

- Strongly disagree
- Disagree
- Slightly disagree
- Neutral
- Slightly agree
- Agree
- Strongly agree

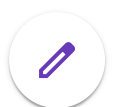

26. Please rate your familiarity with this image. \*

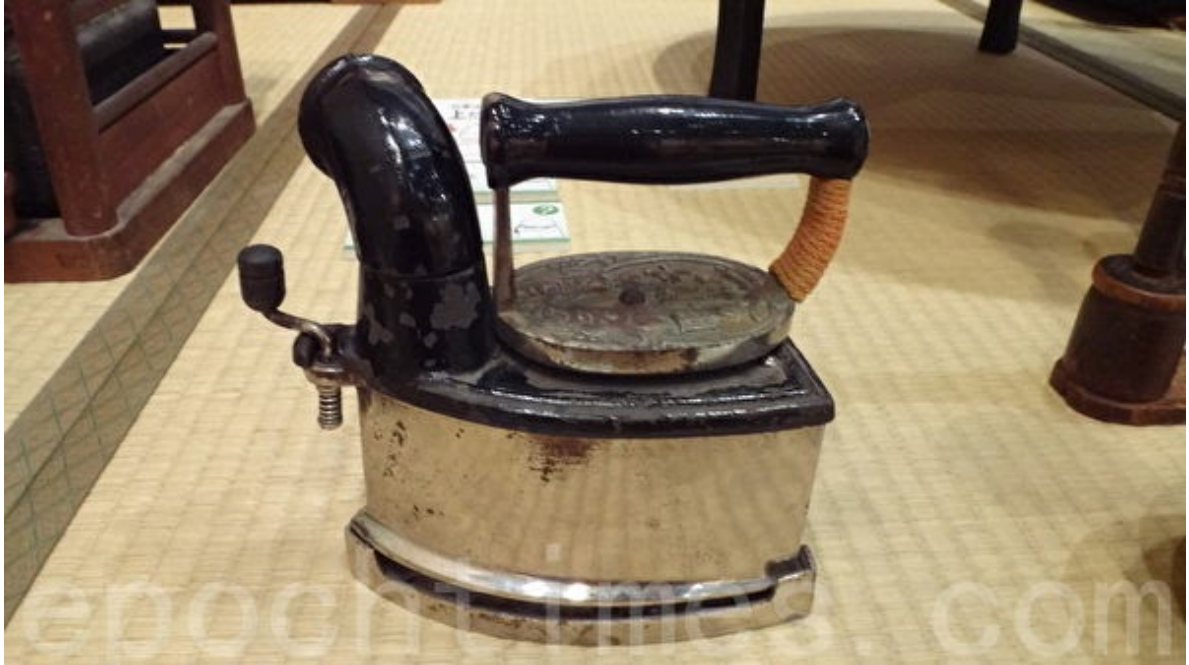

Charcoal iron

- Strongly disagree
- Disagree
- Slightly disagree
- Neutral
- Slightly agree
- Agree
- Strongly agree

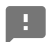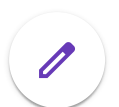

27. Please rate your familiarity with this image. \*

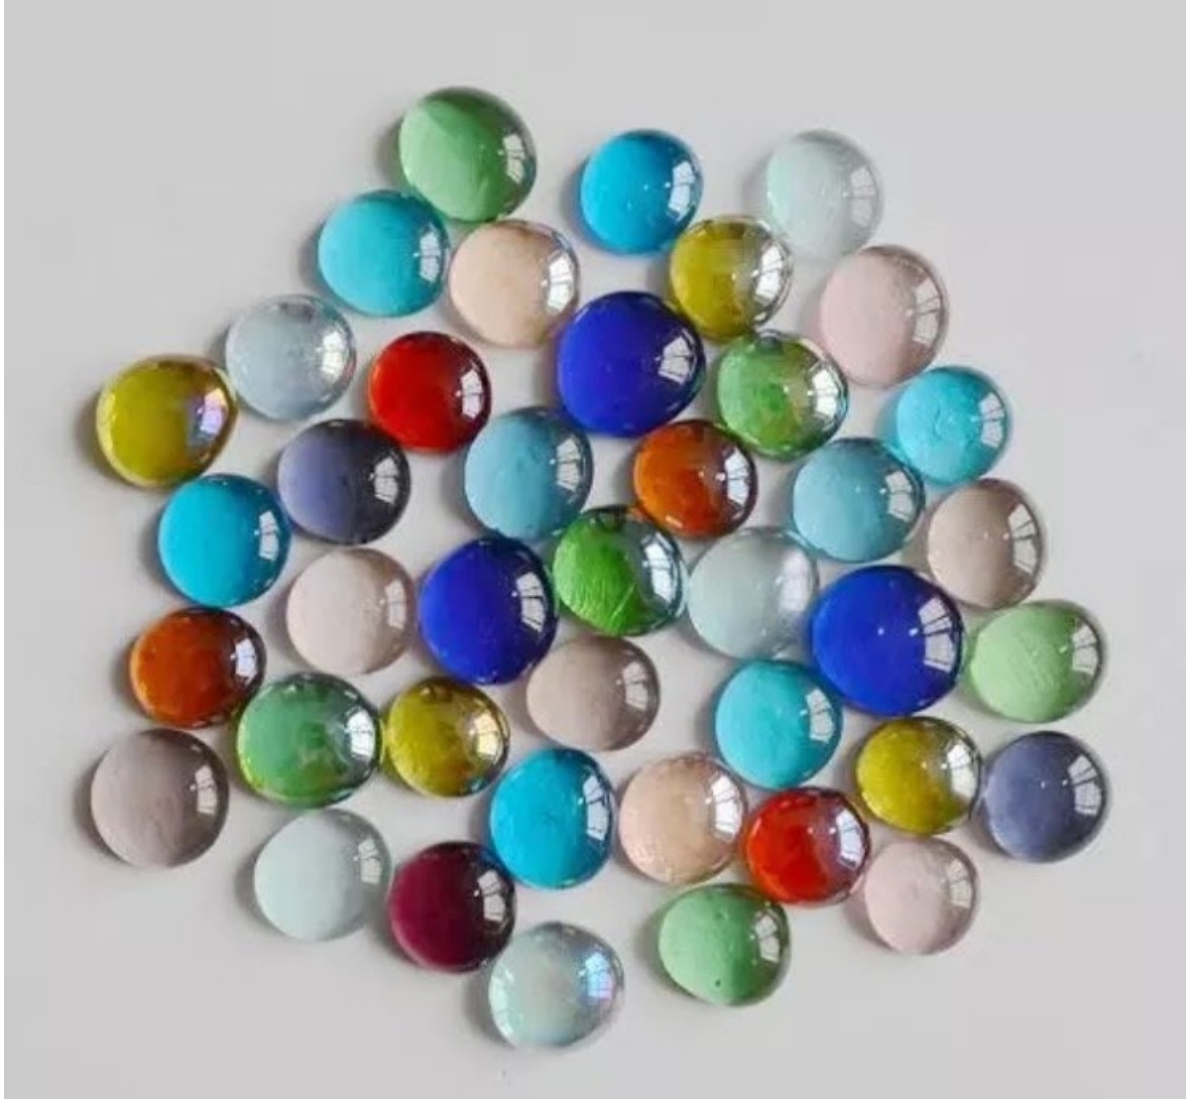

Glass gems

- Strongly disagree
- Disagree
- Slightly disagree
- Neutral
- Slightly agree
- Agree
- Strongly agree

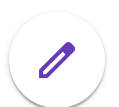



28. Please rate your familiarity with this image. \*

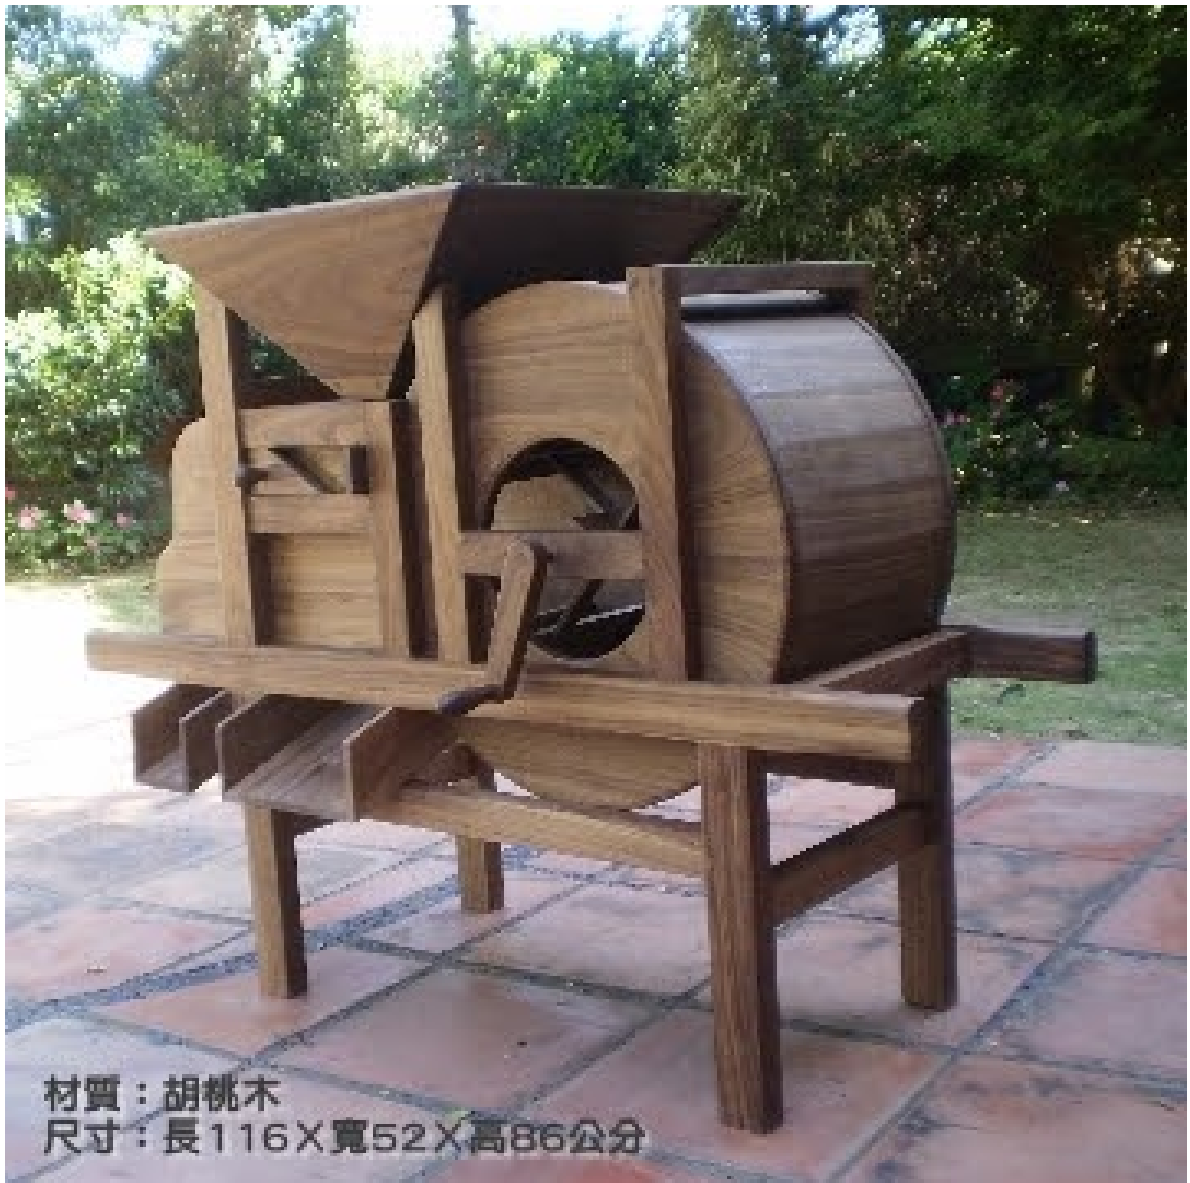

Winnowing machine

- Strongly disagree
- Disagree
- Slightly disagree
- Neutral
- Slightly agree
- Agree
- Strongly agree

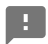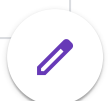

29. Please rate your familiarity with this image. \*

昵图网 nipic.com/

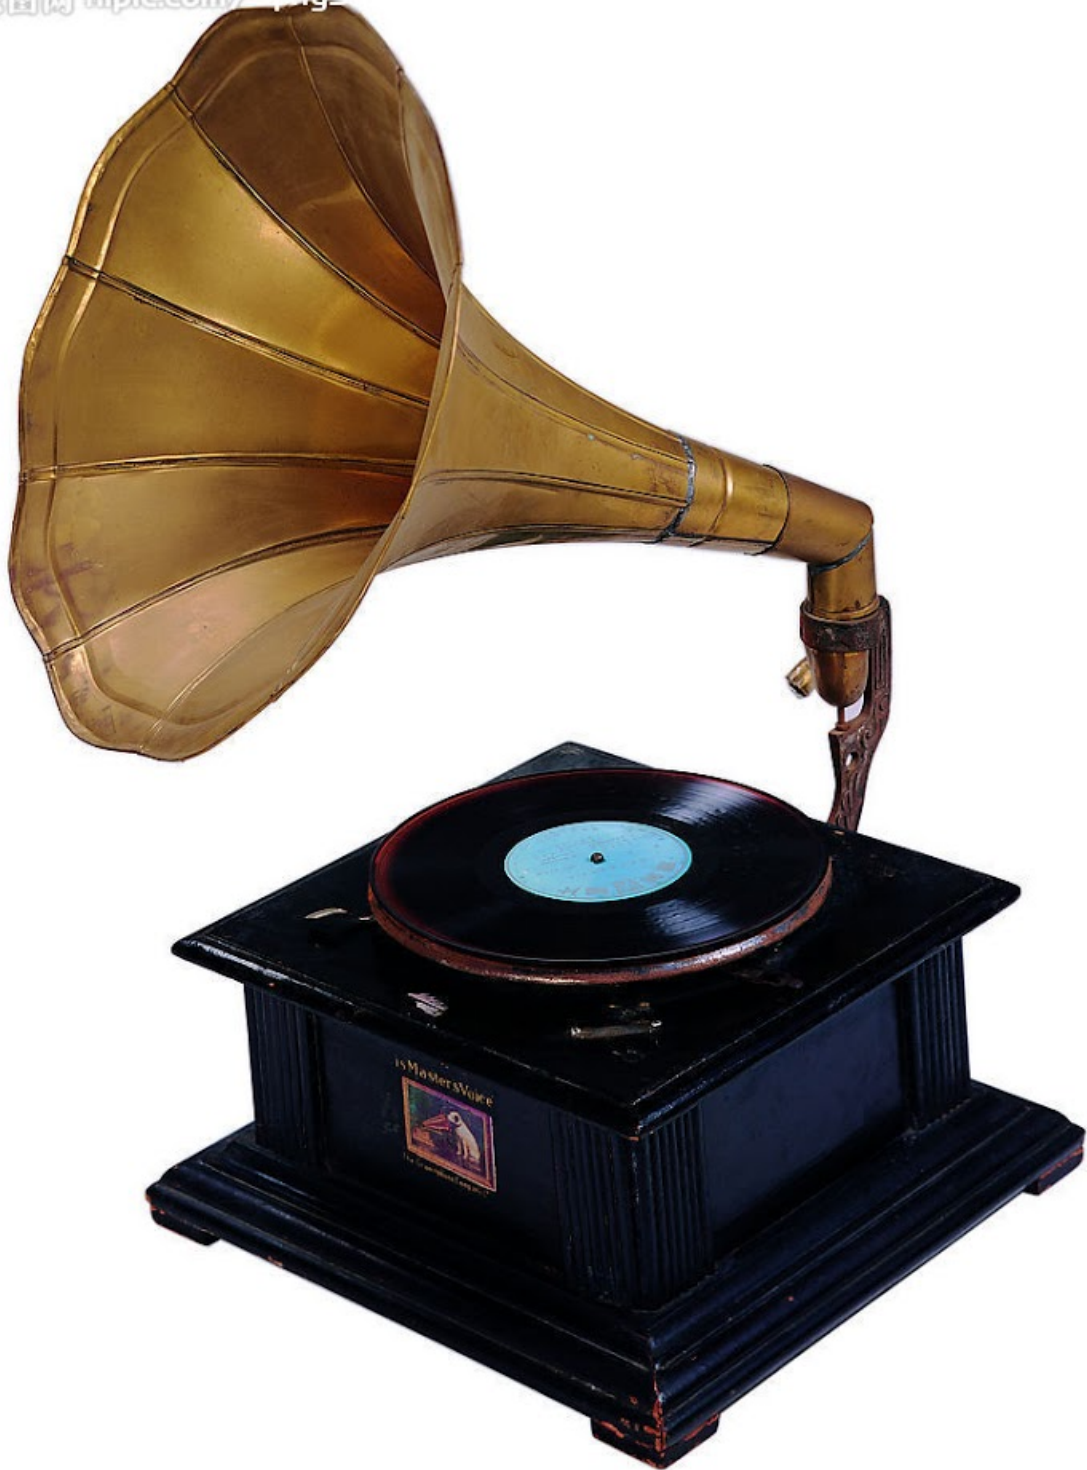

gramophone

- Strongly disagree
- Disagree
- Slightly disagree
- Neutral

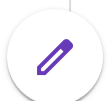

- Slightly agree
- Agree
- Strongly agree

30. Please rate your familiarity with this image. \*

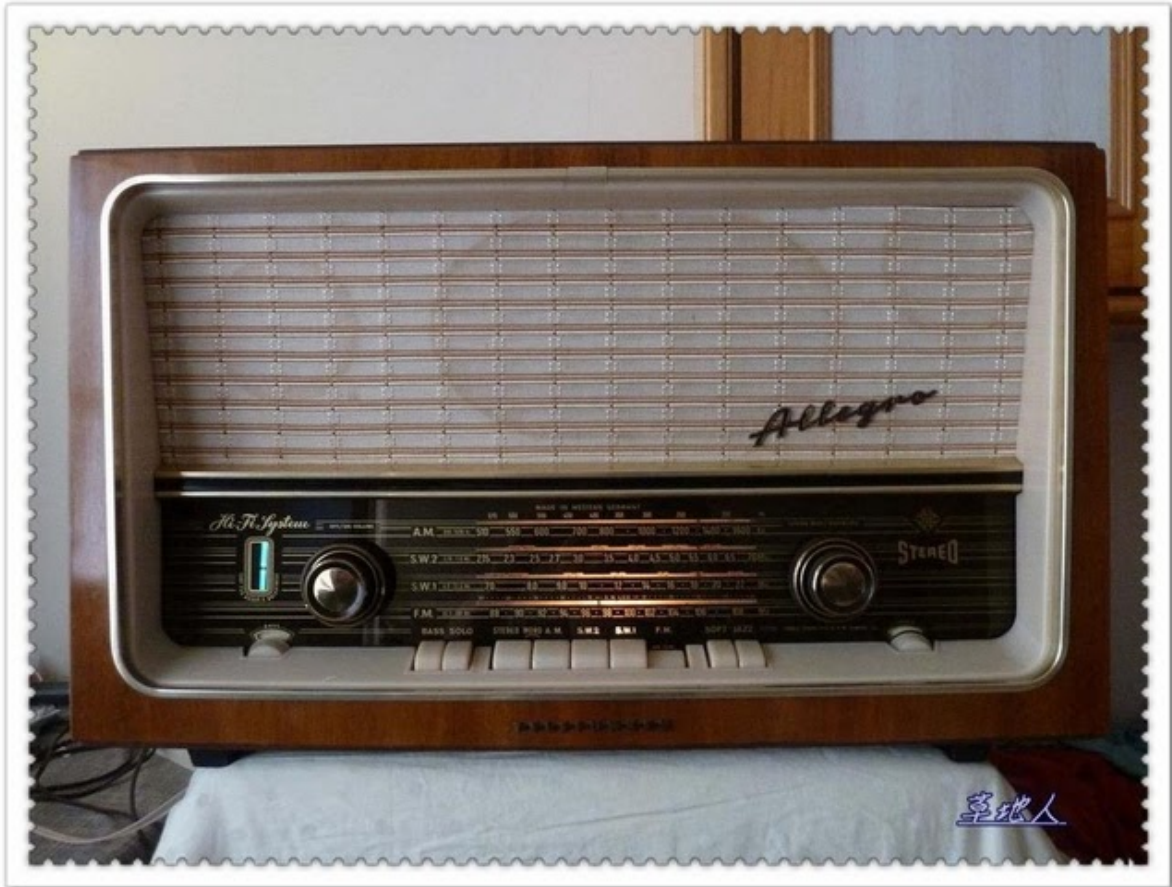

Vacuum tube radio

- Strongly disagree
- Disagree
- Slightly disagree
- Neutral
- Slightly agree
- Agree
- Strongly agree

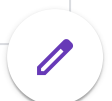

31. Please rate your familiarity with this image. \*

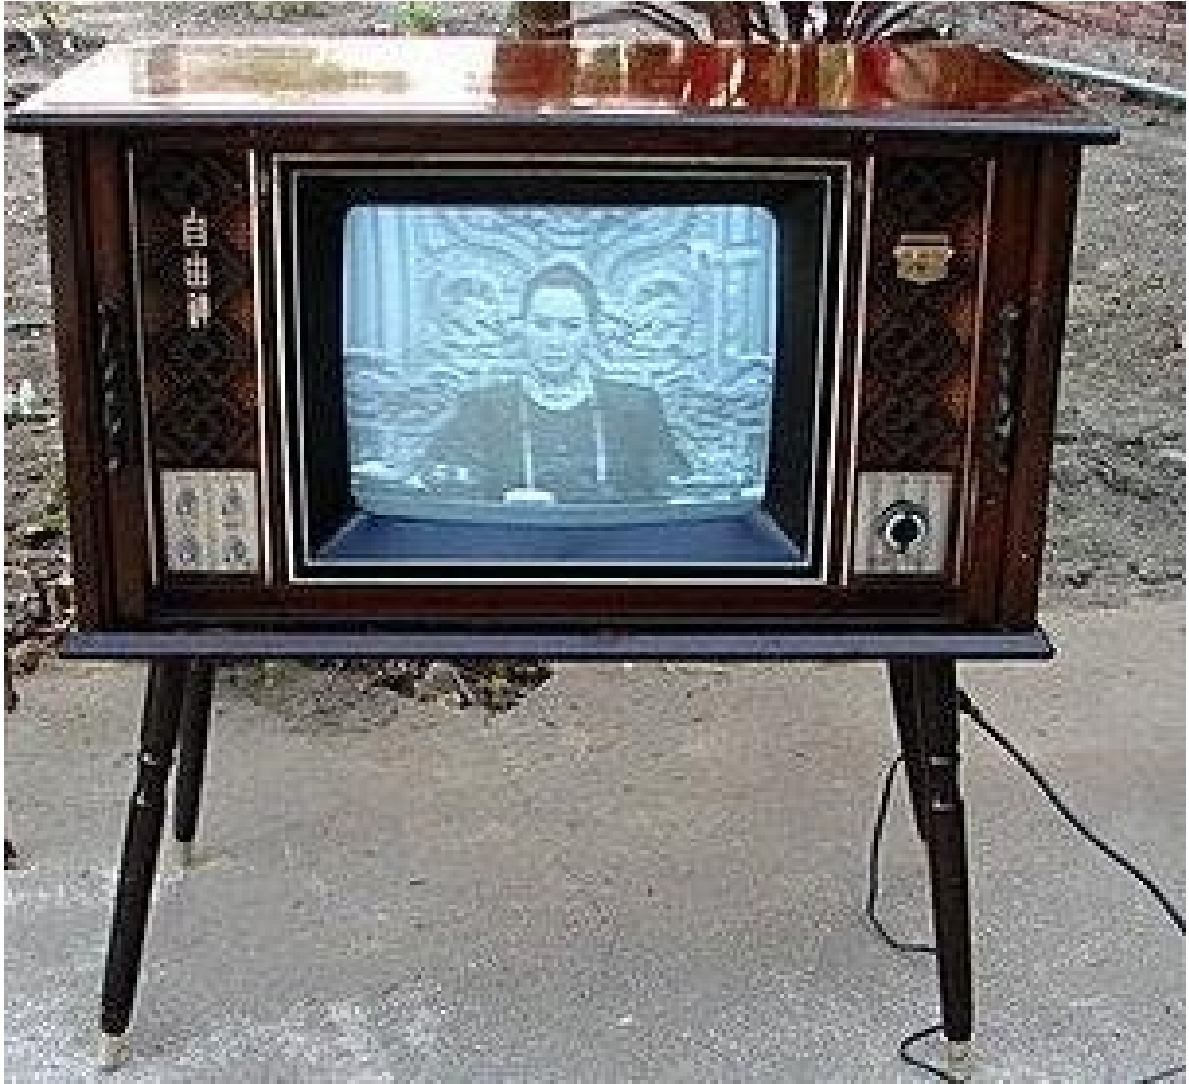

Vacuum tube TV

- Strongly disagree
- Disagree
- Slightly disagree
- Neutral
- Slightly agree
- Agree
- Strongly agree

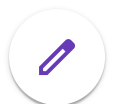



32. Please rate your familiarity with this image. \*

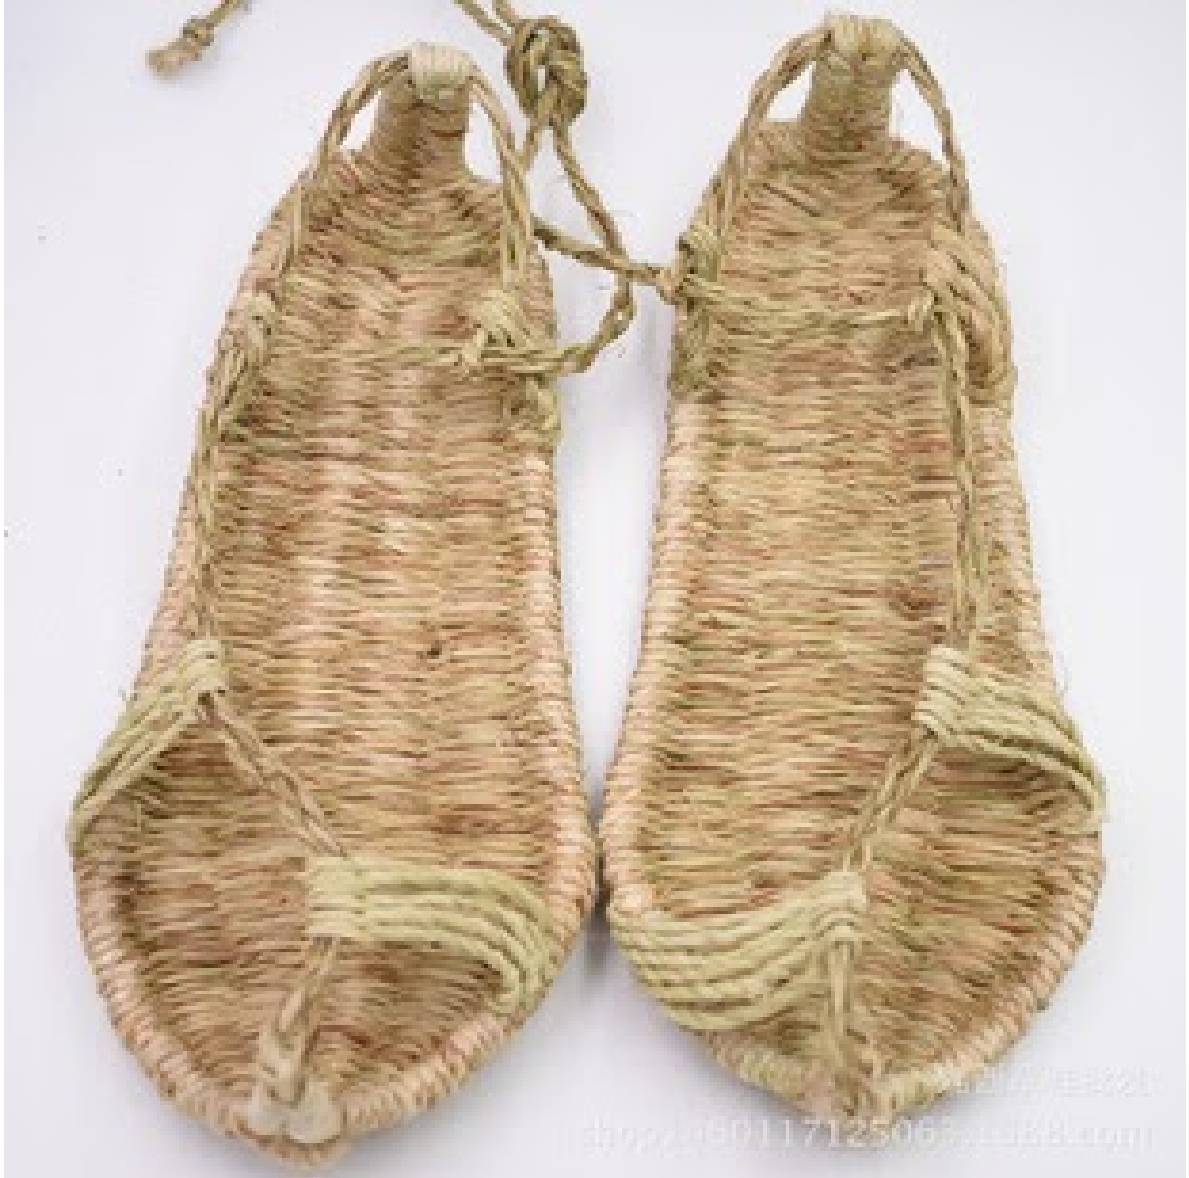

Traditional straw sandals

- Strongly disagree
- Disagree
- Slightly disagree
- Neutral
- Slightly agree
- Agree
- Strongly agree

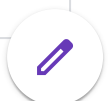

33. Please rate your familiarity with this image. \*

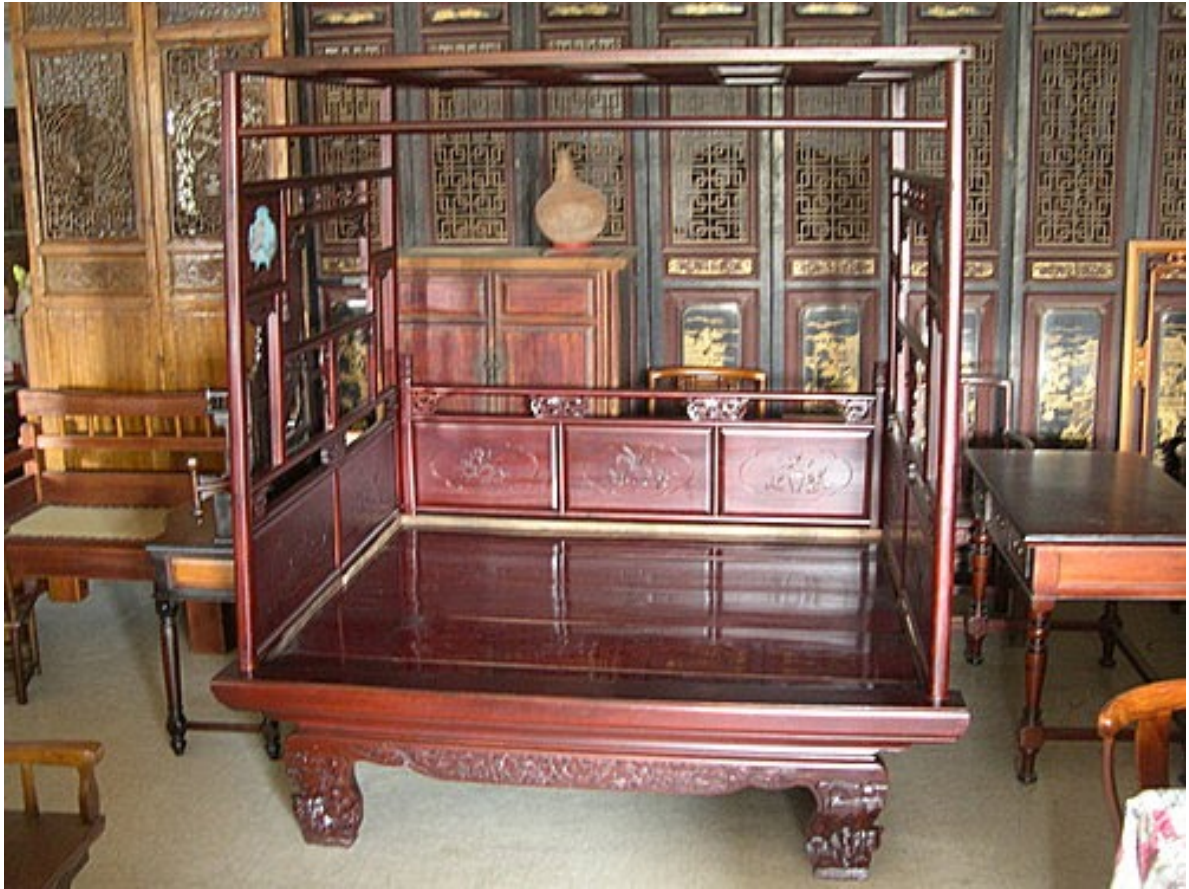

Elevated wood bed frame

- Strongly disagree
- Disagree
- Slightly disagree
- Neutral
- Slightly agree
- Agree
- Strongly agree

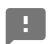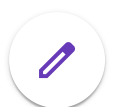

34. Please rate your familiarity with this image. \*

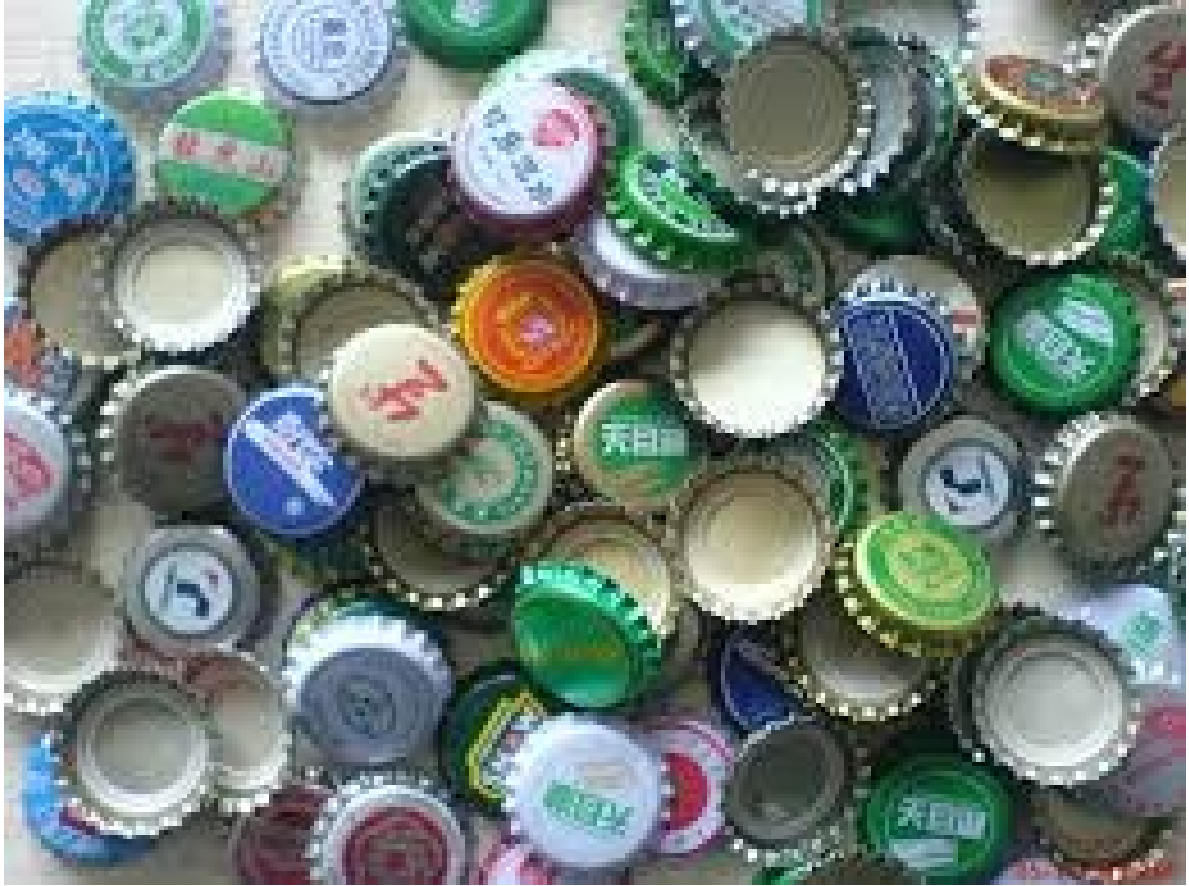

Bottle caps

- Strongly disagree
- Disagree
- Slightly disagree
- Neutral
- Slightly agree
- Agree
- Strongly agree

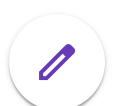

35. Please rate your familiarity with this image. \*

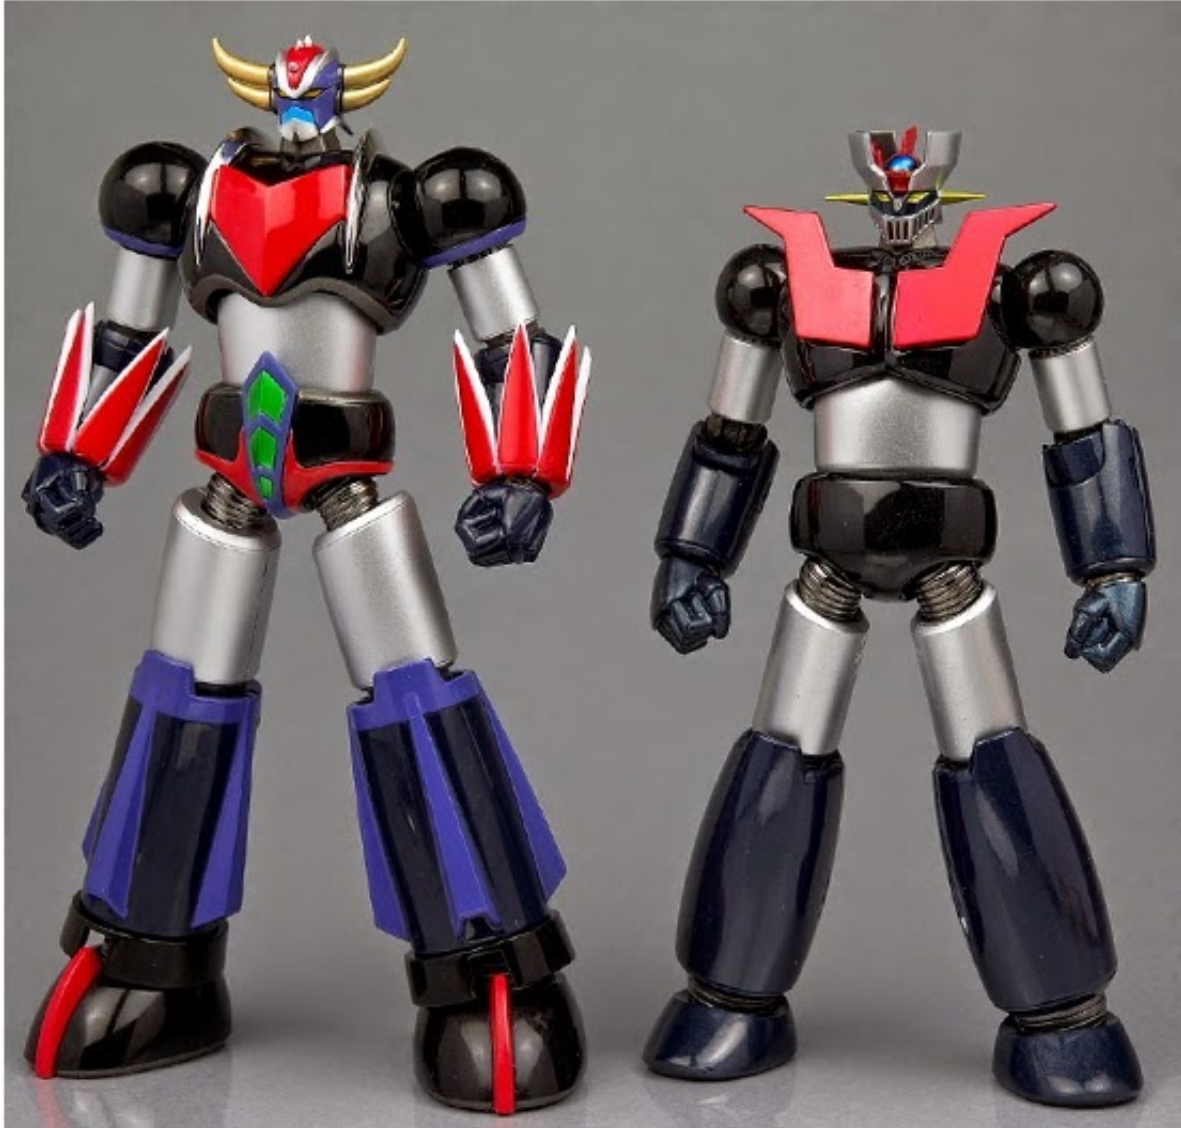

Mazinger Z figurine

- Strongly disagree
- Disagree
- Slightly disagree
- Neutral
- Slightly agree
- Agree
- Strongly agree

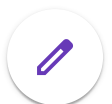



36. Please rate your familiarity with this image. \*

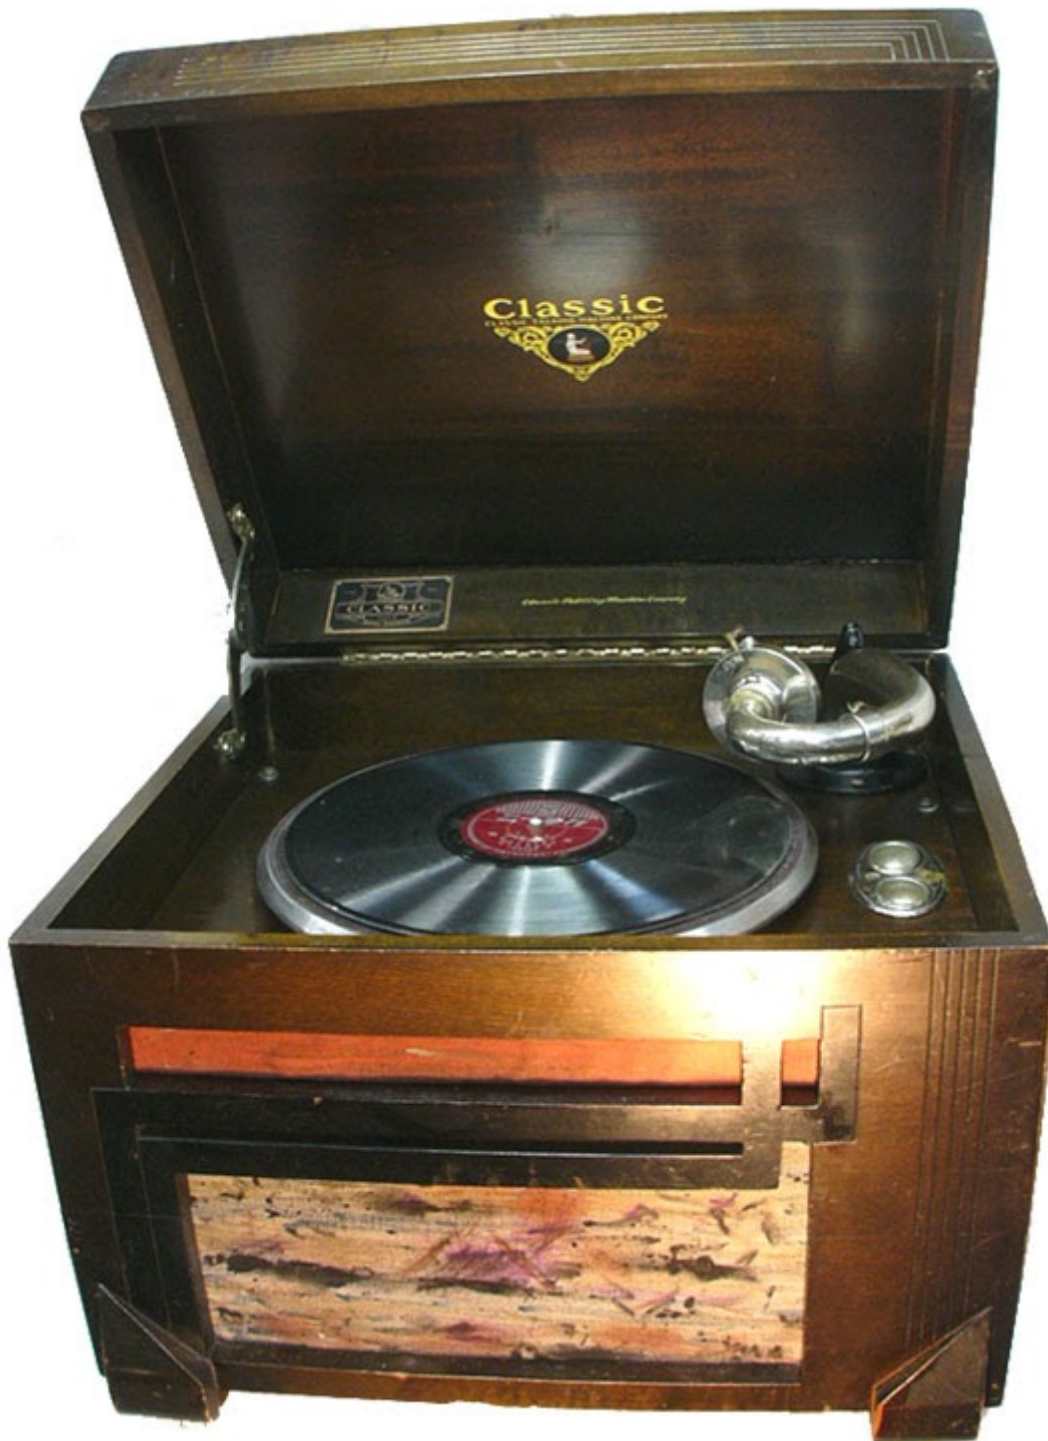

Turntable

- Strongly disagree
- Disagree
- Slightly disagree
- Neutral
- Slightly agree

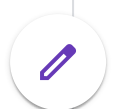

- Agree
- Strongly agree

37. Please rate your familiarity with this image. \*

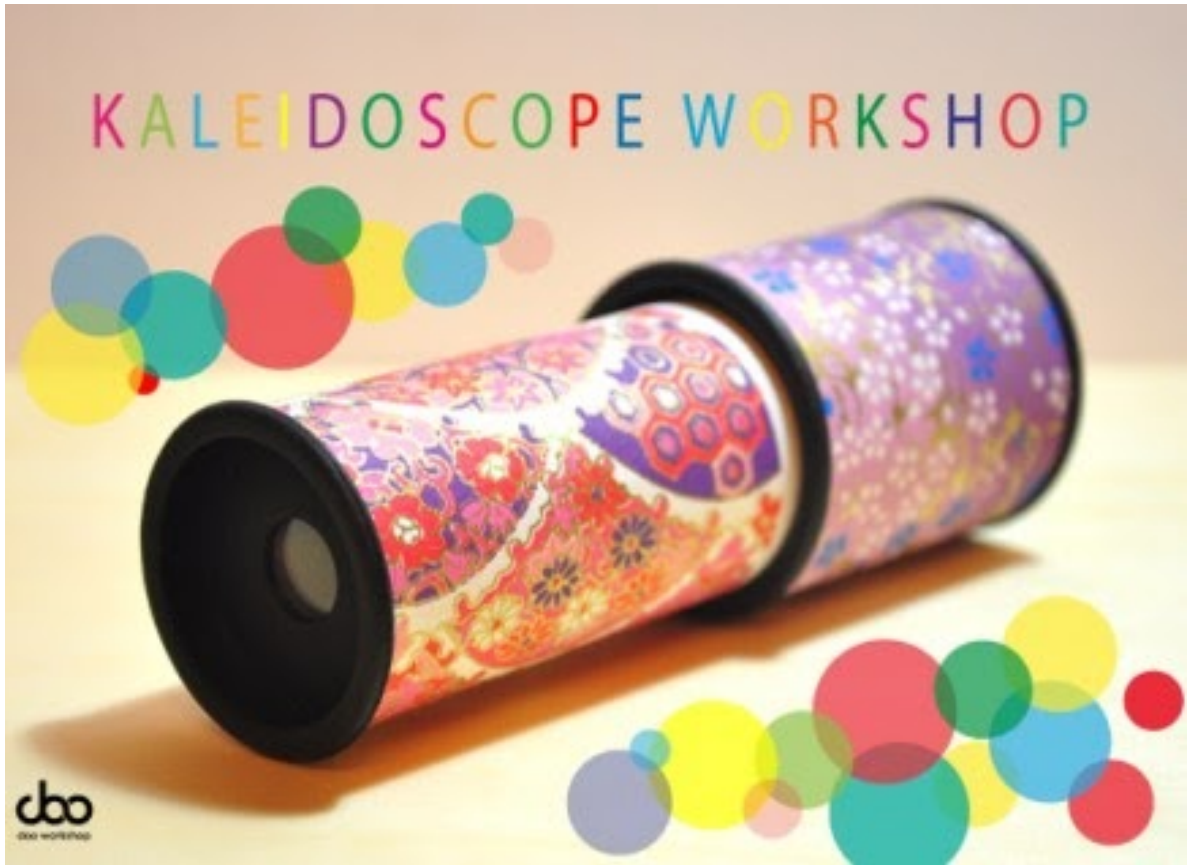

Kaleidoscope

- Strongly disagree
- Disagree
- Slightly disagree
- Neutral
- Slightly agree
- Agree
- Strongly agree

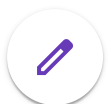

38. Please rate your familiarity with this image. \*

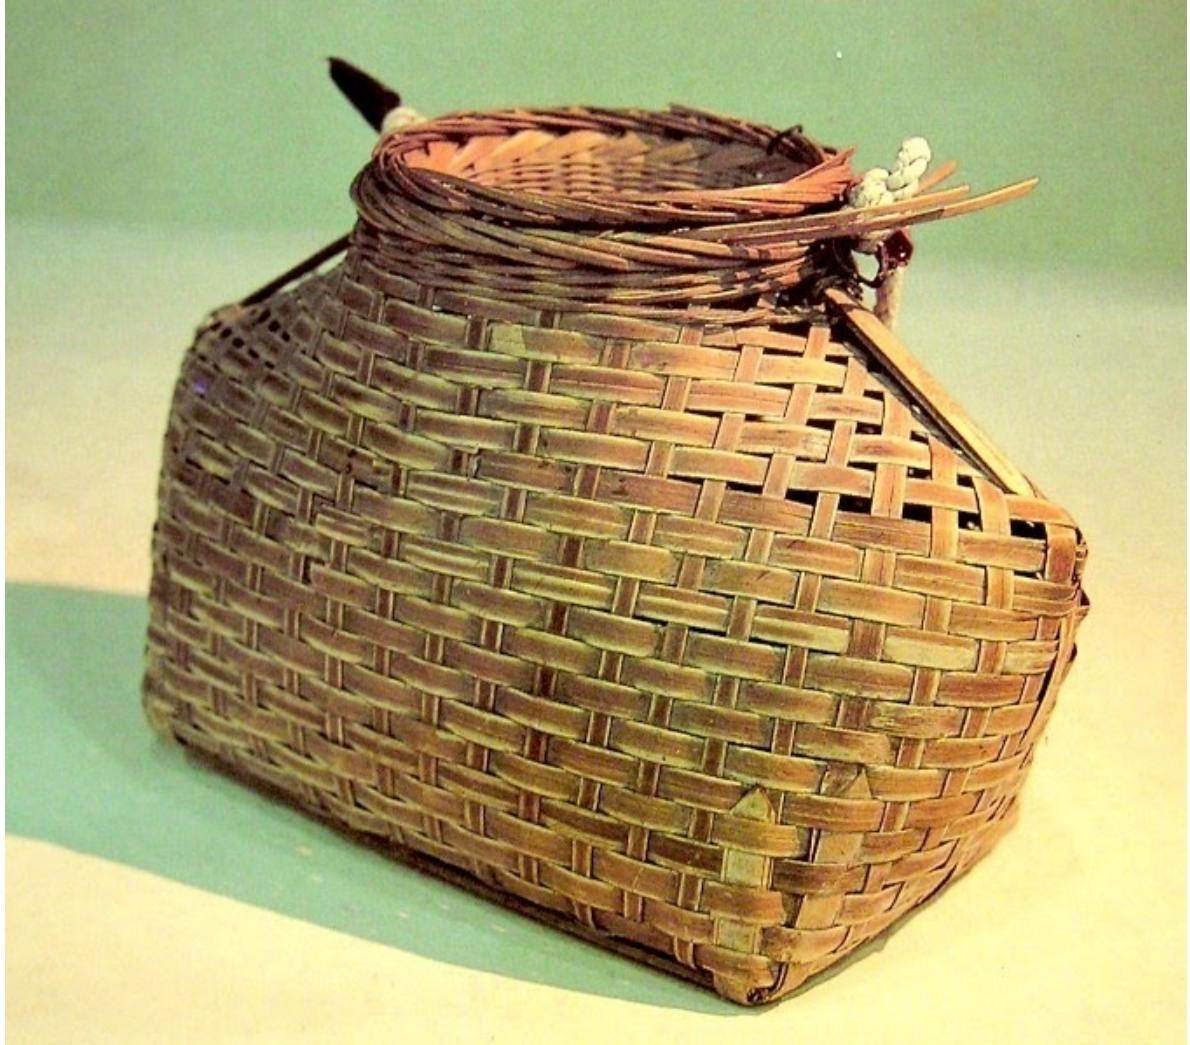

Bamboo fish basket

- Strongly disagree
- Disagree
- Slightly disagree
- Neutral
- Slightly agree
- Agree
- Strongly agree

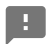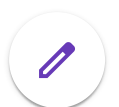



39. Please rate your familiarity with this image. \*

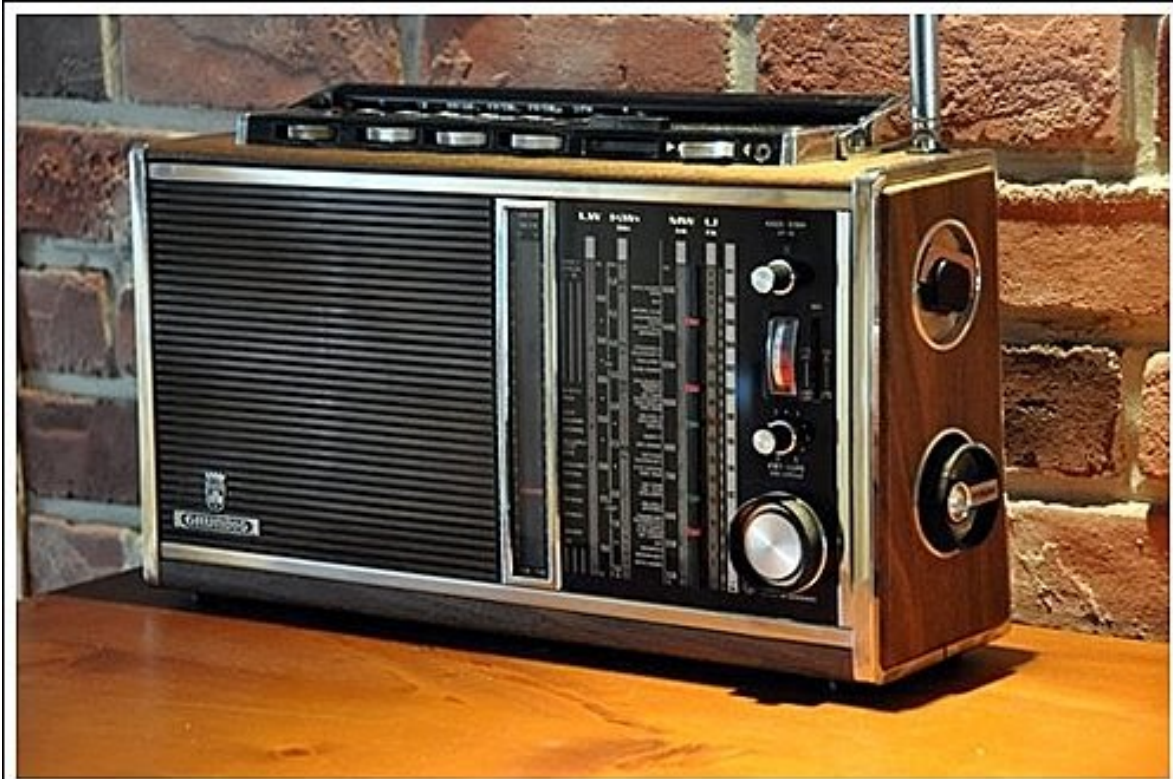

*GRUNDIG SATELLIT 210-Transistor 6001*

Transistor radio

- Strongly disagree
- Disagree
- Slightly disagree
- Neutral
- Slightly agree
- Agree
- Strongly agree

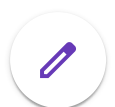



40. Please rate your familiarity with this image. \*

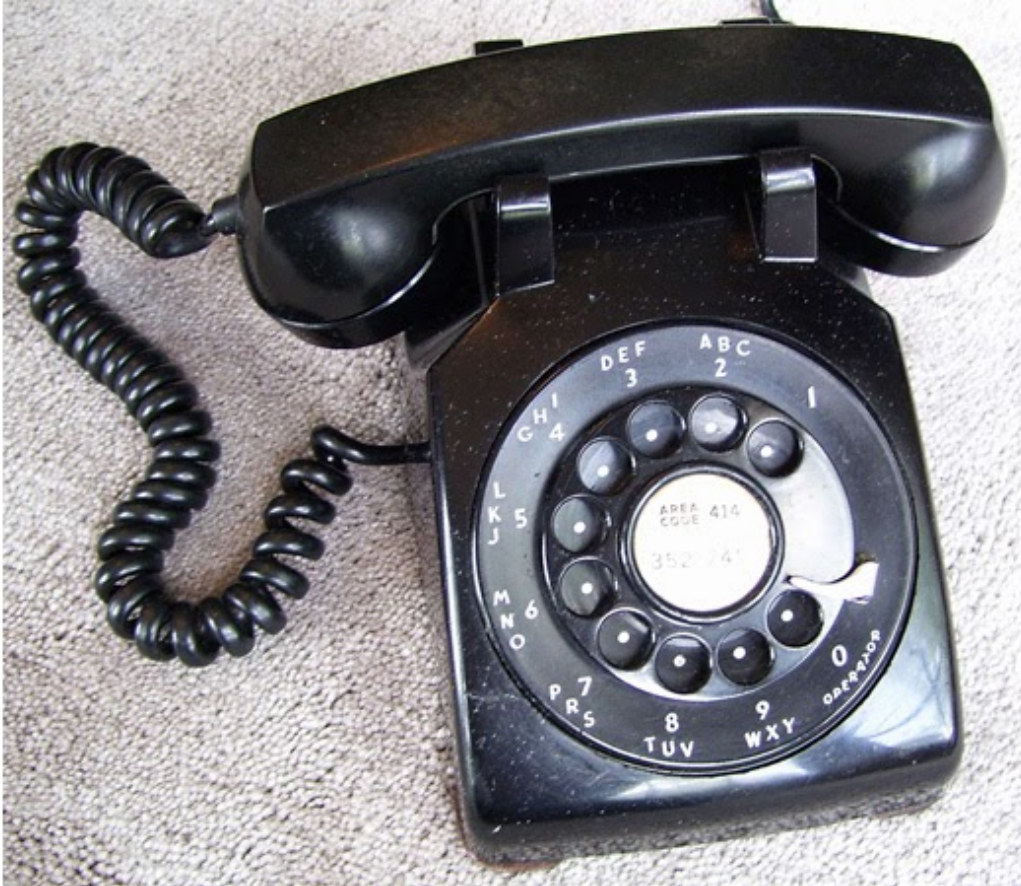

Rotary phone

- Strongly disagree
- Disagree
- Slightly disagree
- Neutral
- Slightly agree
- Agree
- Strongly agree

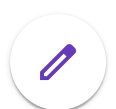

41. Please rate your familiarity with this image. \*

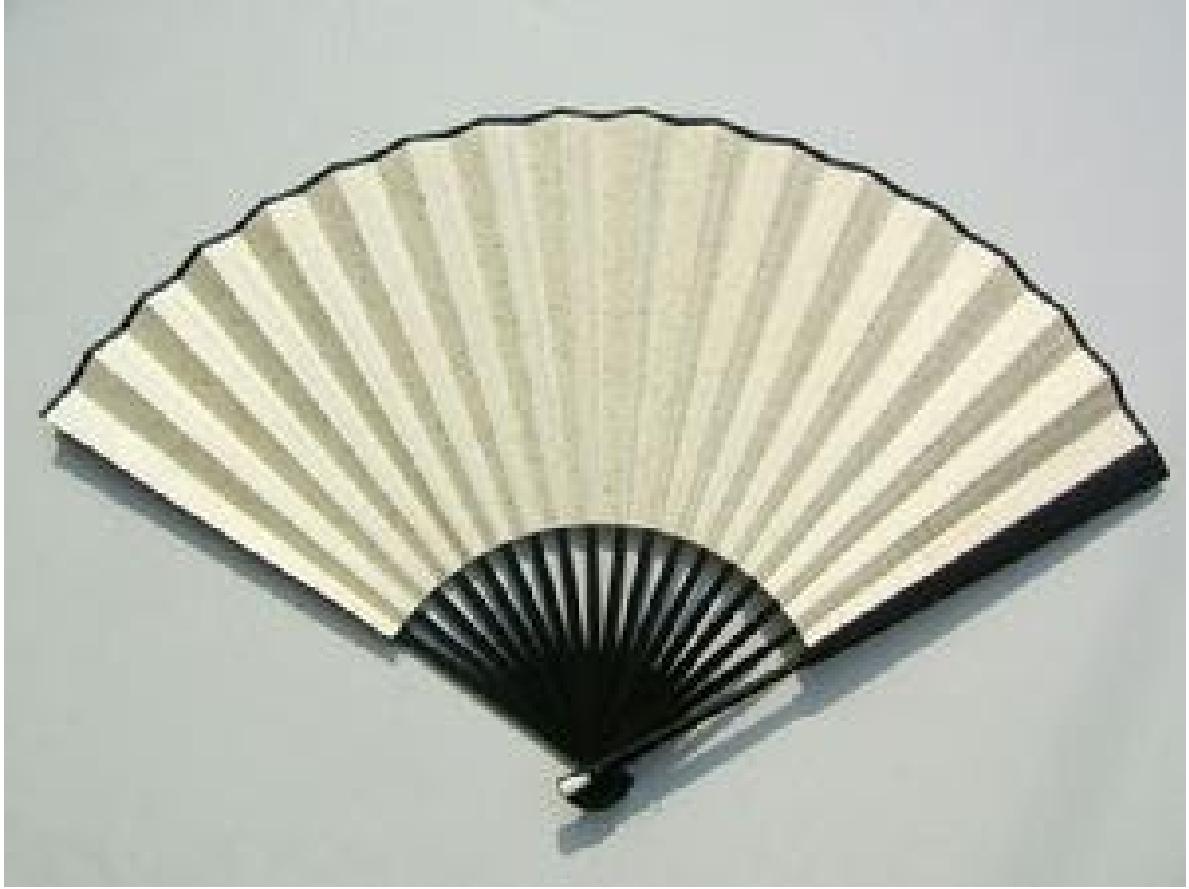

Hand fan

- Strongly disagree
- Disagree
- Slightly disagree
- Neutral
- Slightly agree
- Agree
- Strongly agree

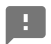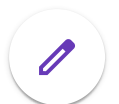

42. Please rate your familiarity with this image. \*

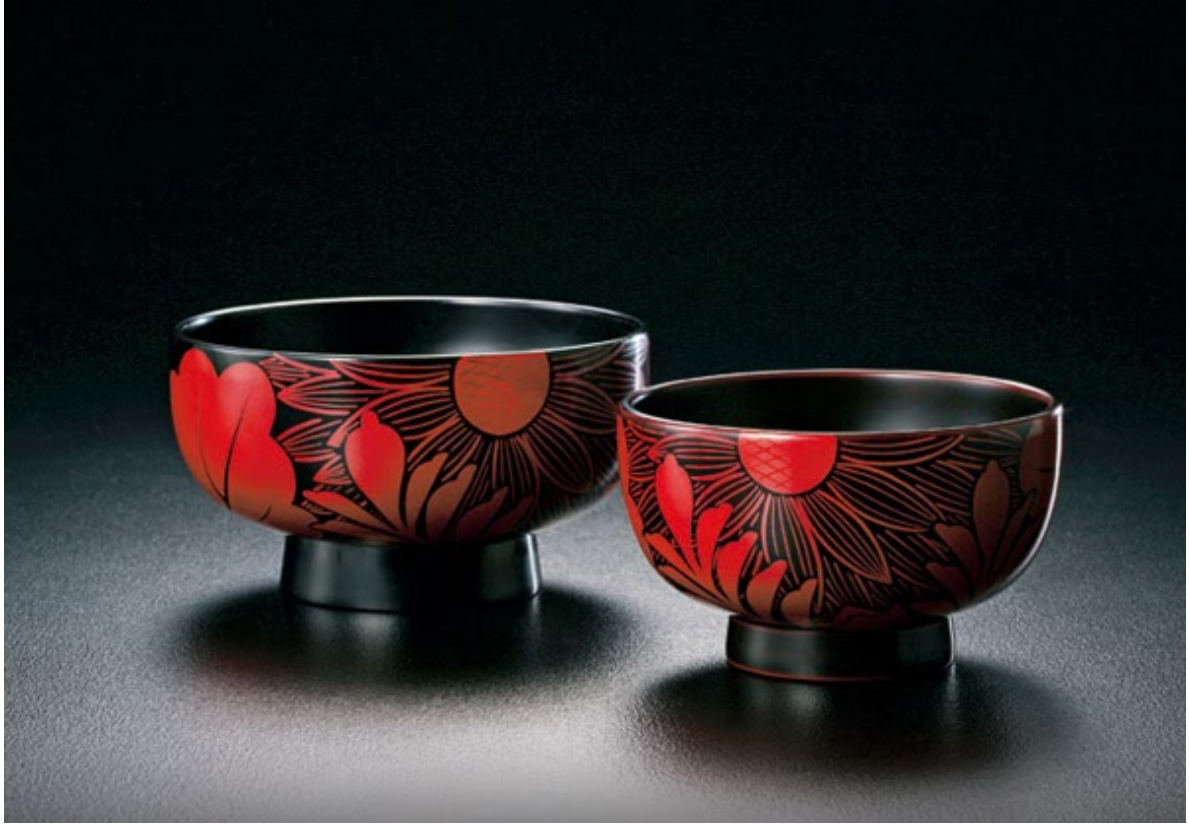

Lacquerware

- Strongly disagree
- Disagree
- Slightly disagree
- Neutral
- Slightly agree
- Agree
- Strongly agree

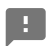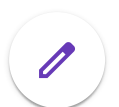

43. Please rate your familiarity with this image. \*

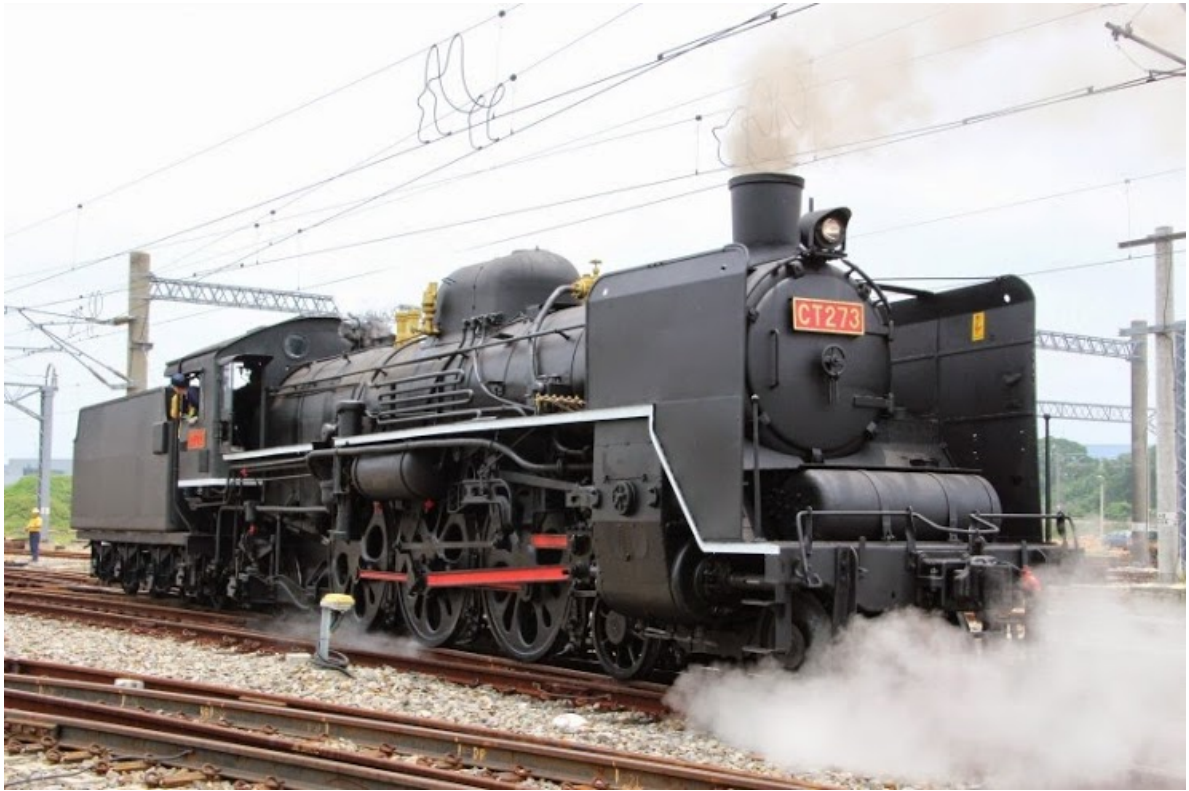

Steam trains

- Strongly disagree
- Disagree
- Slightly disagree
- Neutral
- Slightly agree
- Agree
- Strongly agree

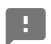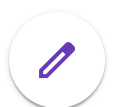



44. Please rate your familiarity with this image. \*

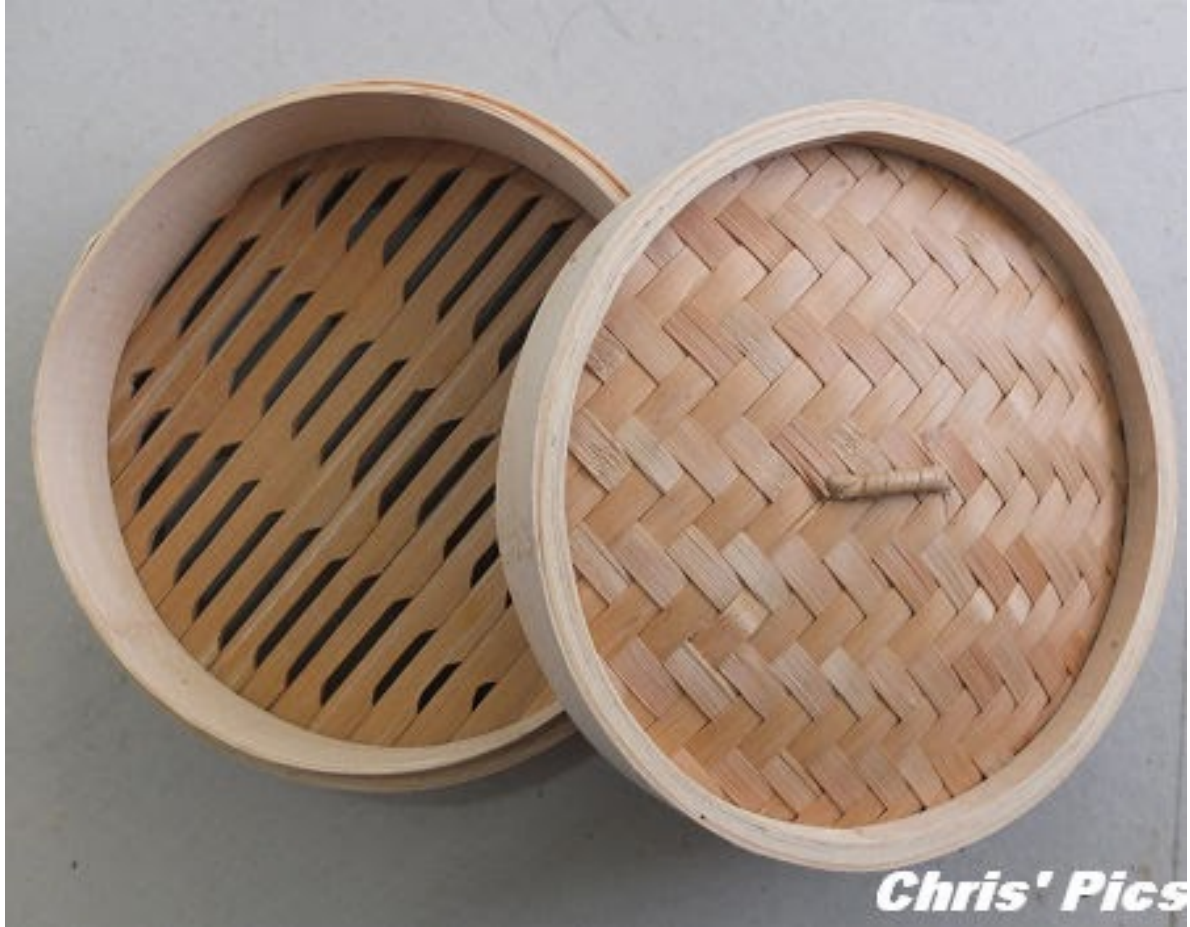

Bamboo steamer

- Strongly disagree
- Disagree
- Slightly disagree
- Neutral
- Slightly agree
- Agree
- Strongly agree

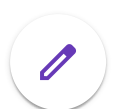

45. Please rate your familiarity with this image. \*

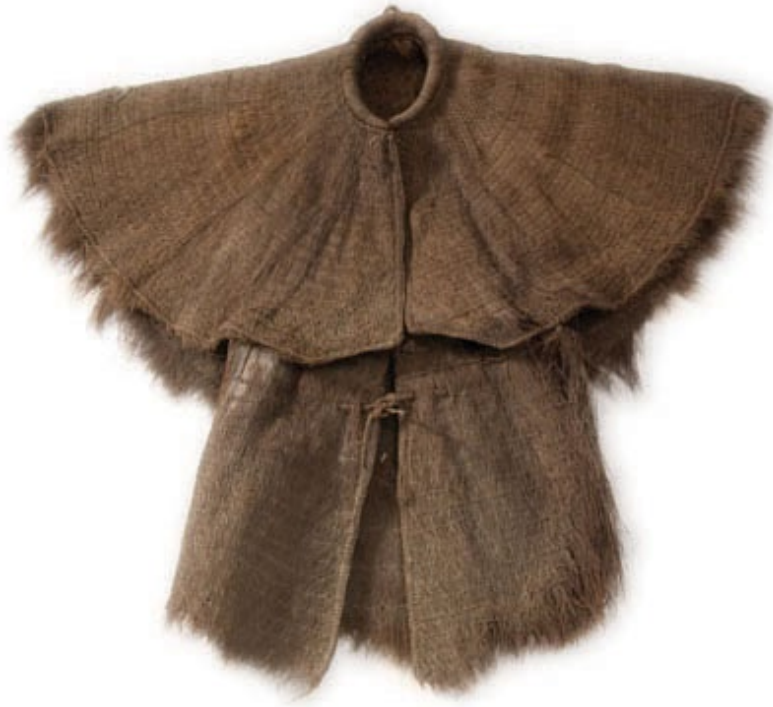

Straw cape

- Strongly disagree
- Disagree
- Slightly disagree
- Neutral
- Slightly agree
- Agree
- Strongly agree

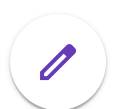

46. Please rate your familiarity with this image. \*

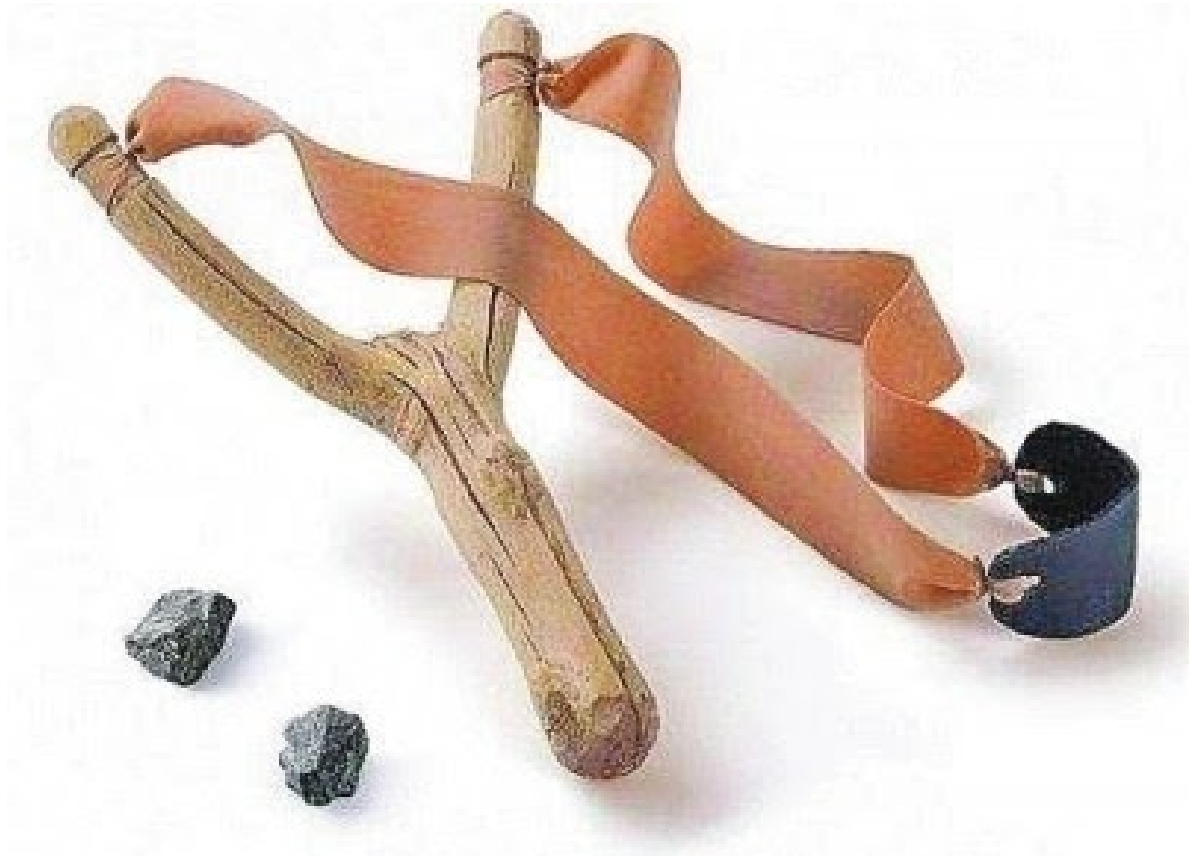

Slingshot

- Strongly disagree
- Disagree
- Slightly disagree
- Neutral
- Slightly agree
- Agree
- Strongly agree

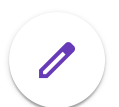

47. Please rate your familiarity with this image. \*

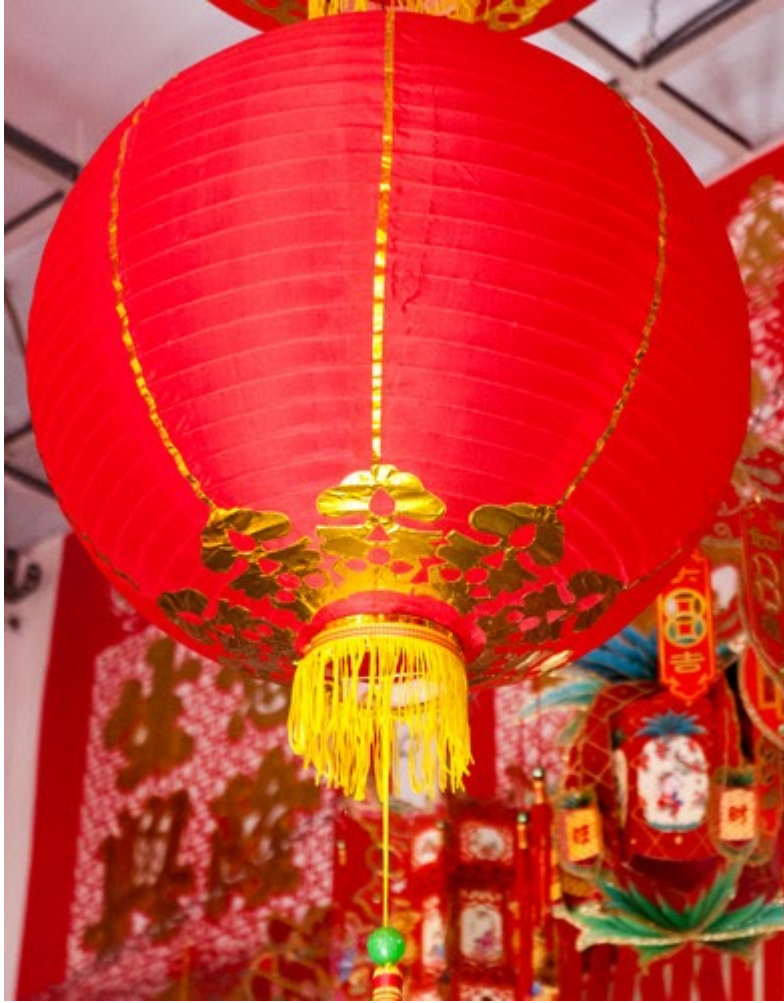

Lantern

- Strongly disagree
- Disagree
- Slightly disagree
- Neutral
- Slightly agree
- Agree
- Strongly agree

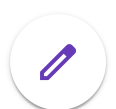



48. Please rate your familiarity with this image. \*

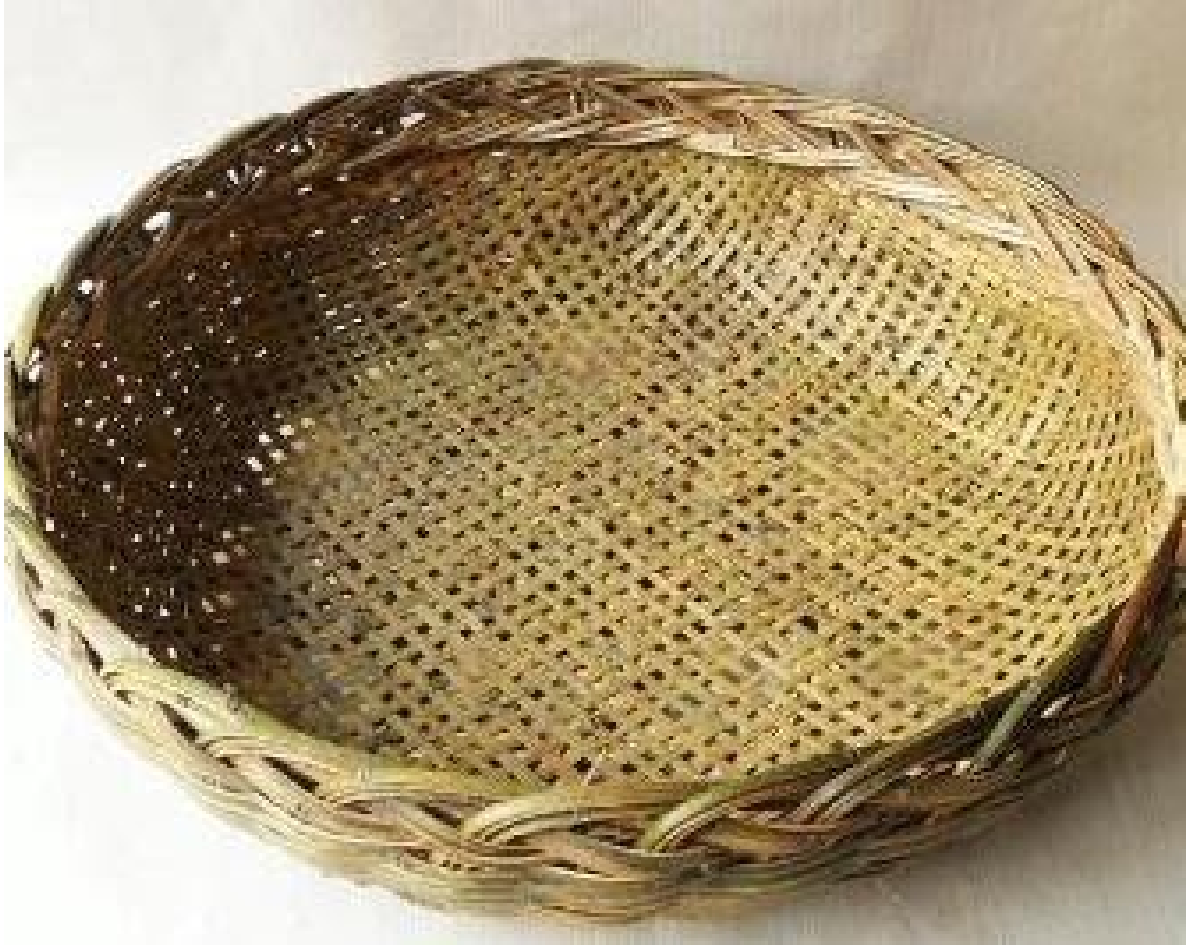

Bamboo sieve

- Strongly disagree
- Disagree
- Slightly disagree
- Neutral
- Slightly agree
- Agree
- Strongly agree

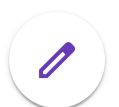

49. Please rate your familiarity with this image. \*

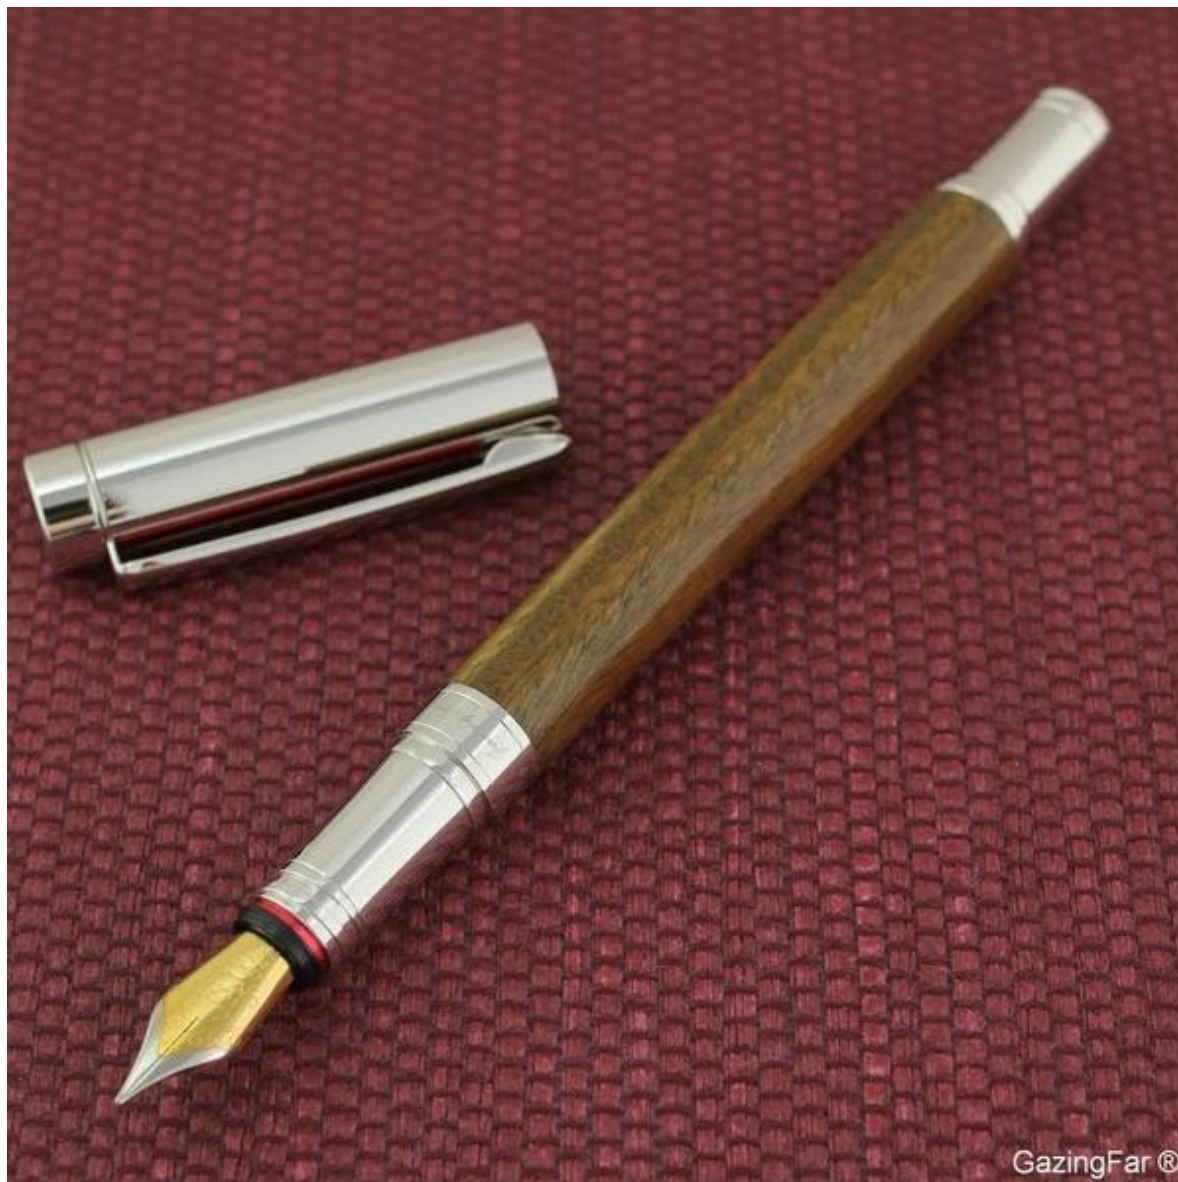

Fountain pen

- Strongly disagree
- Disagree
- Slightly disagree
- Neutral
- Slightly agree
- Agree
- Strongly agree

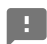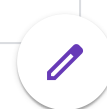

50. Please rate your familiarity with this image. \*

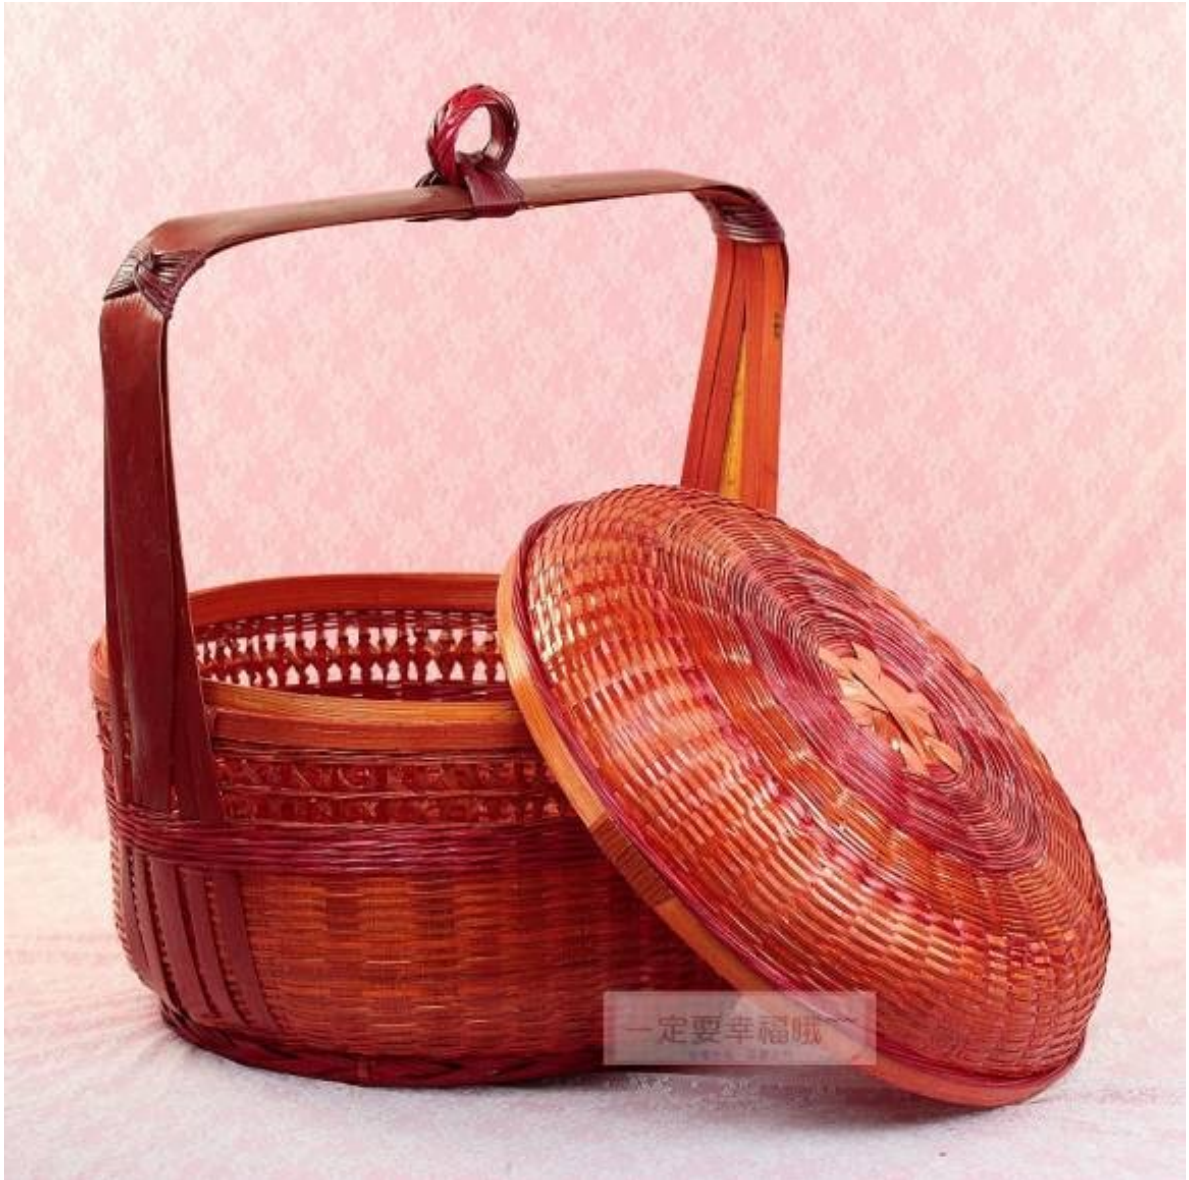

Wedding gift basket

- Strongly disagree
- Disagree
- Slightly disagree
- Neutral
- Slightly agree
- Agree
- Strongly agree

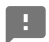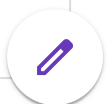



51. Please rate your familiarity with this image. \*

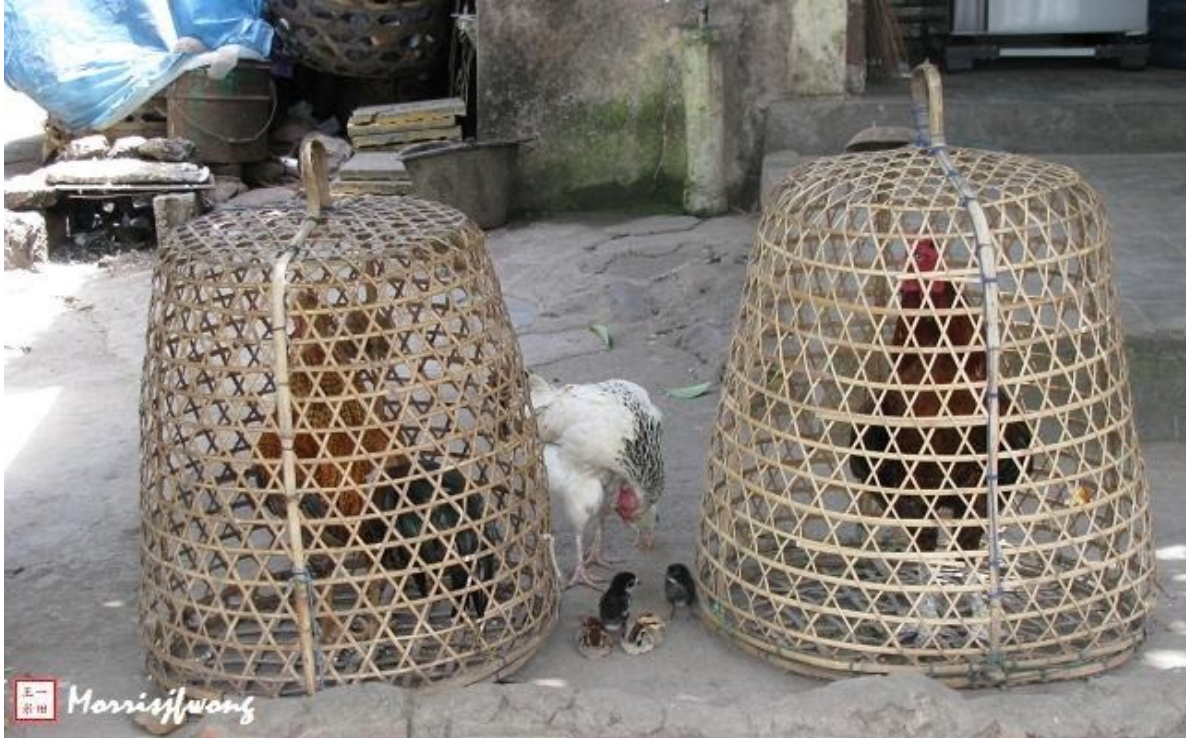

Bamboo chicken coop

- Strongly disagree
- Disagree
- Slightly disagree
- Neutral
- Slightly agree
- Agree
- Strongly agree

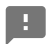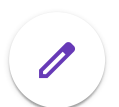



52. Please rate your familiarity with this image. \*

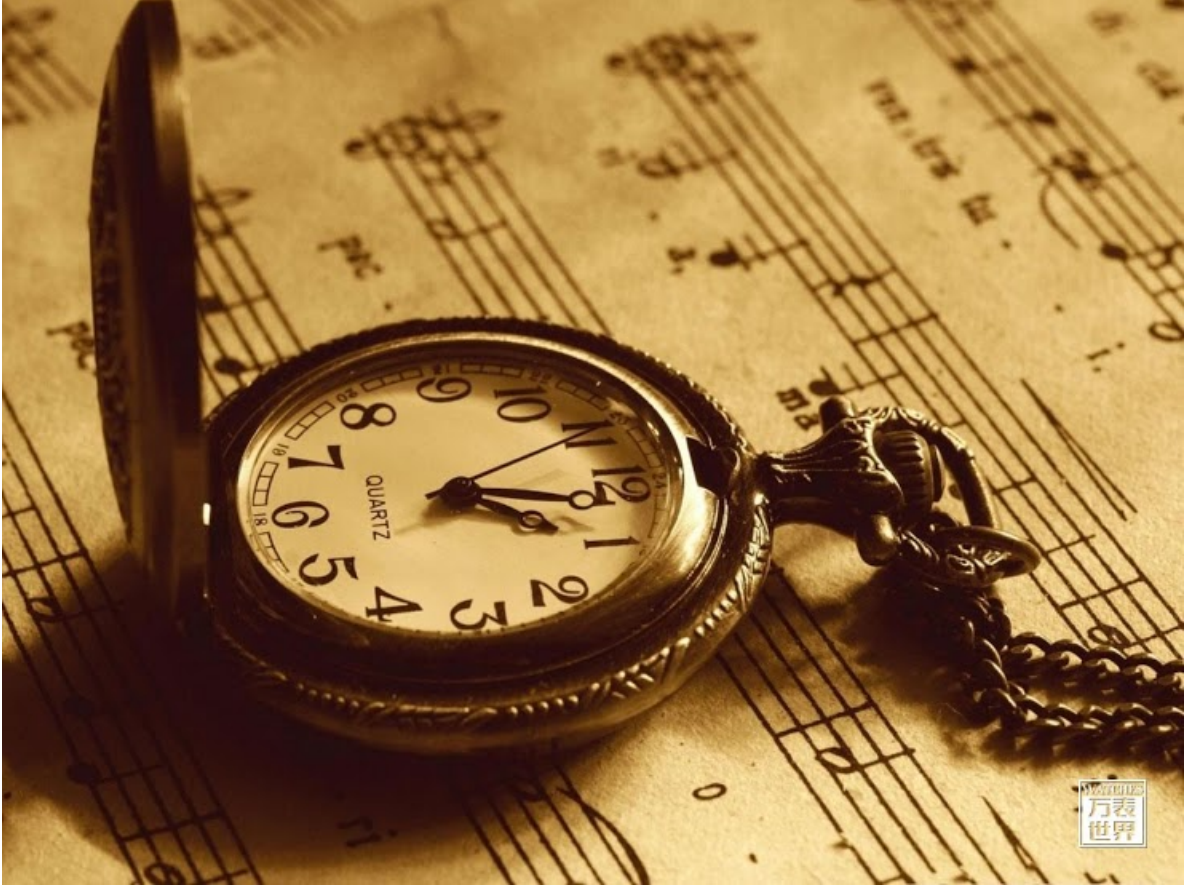

Pocket watch

- Strongly disagree
- Disagree
- Slightly disagree
- Neutral
- Slightly agree
- Agree
- Strongly agree

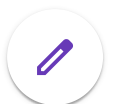

53. Please rate your familiarity with this image. \*

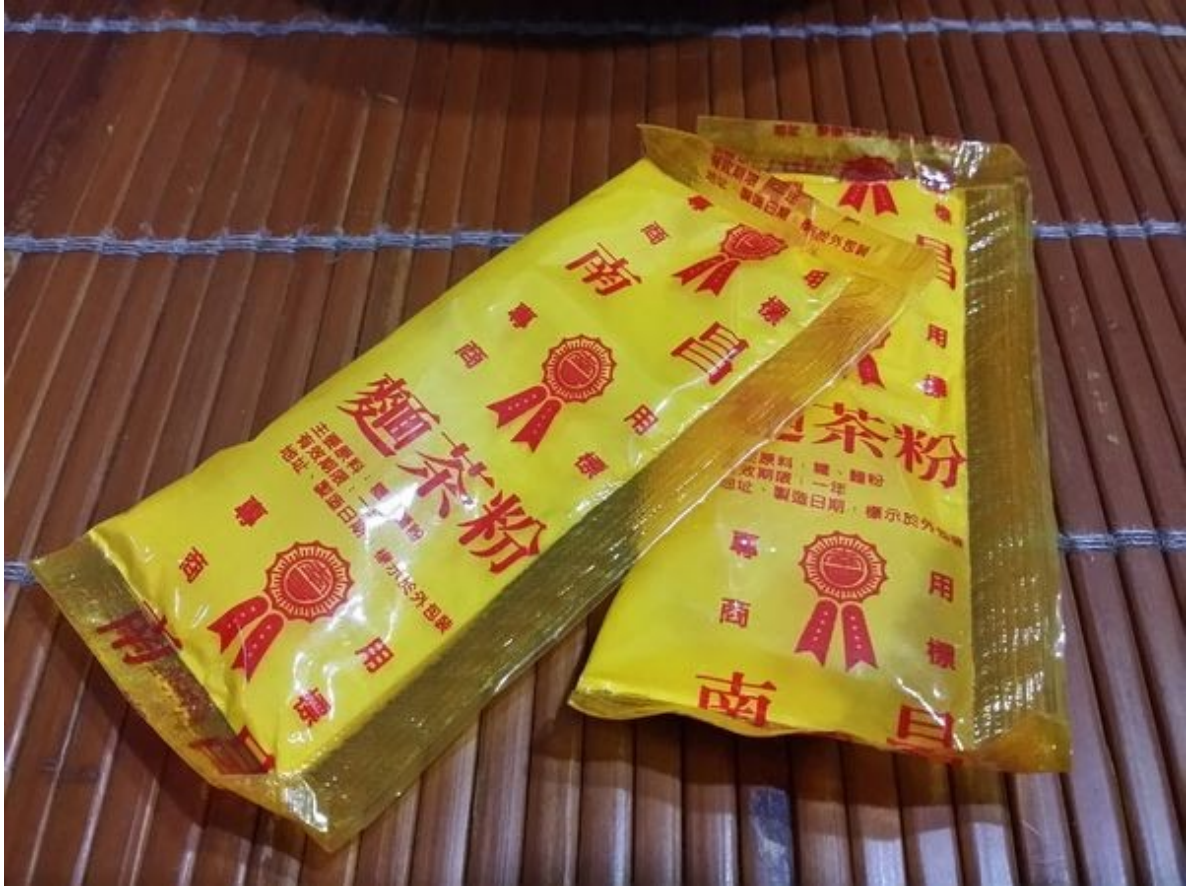

Roasted wheat flour

- Strongly disagree
- Disagree
- Slightly disagree
- Neutral
- Slightly agree
- Agree
- Strongly agree

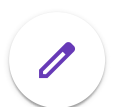

54. Please rate your familiarity with this image. \*

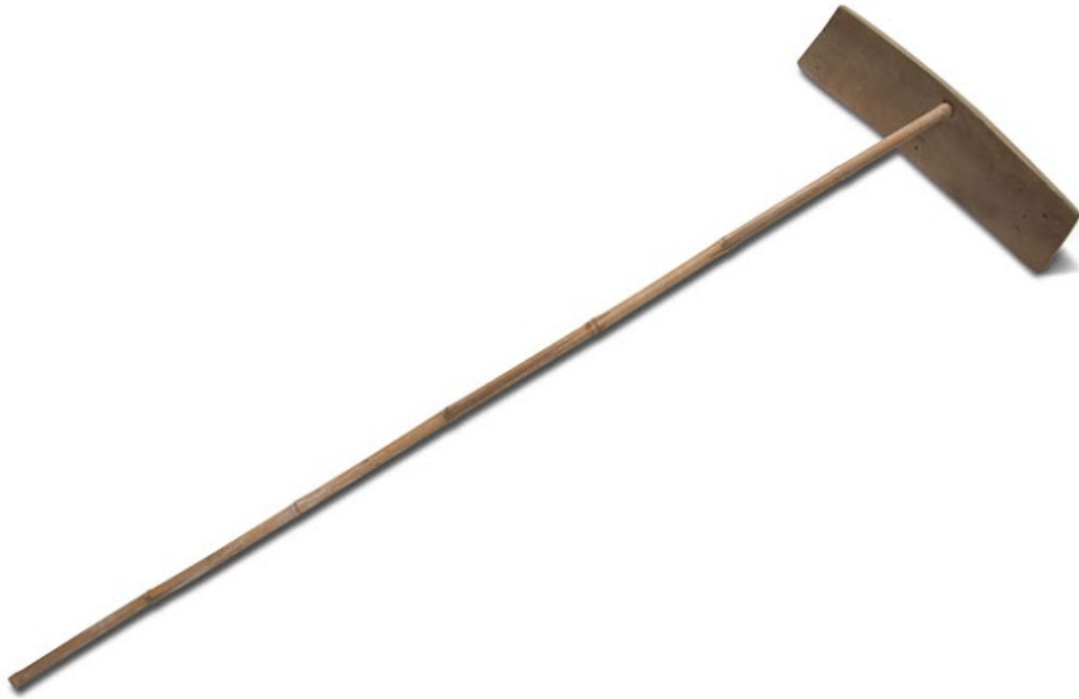

Harrow

- Strongly disagree
- Disagree
- Slightly disagree
- Neutral
- Slightly agree
- Agree
- Strongly agree

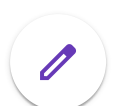

55. Please rate your familiarity with this image. \*

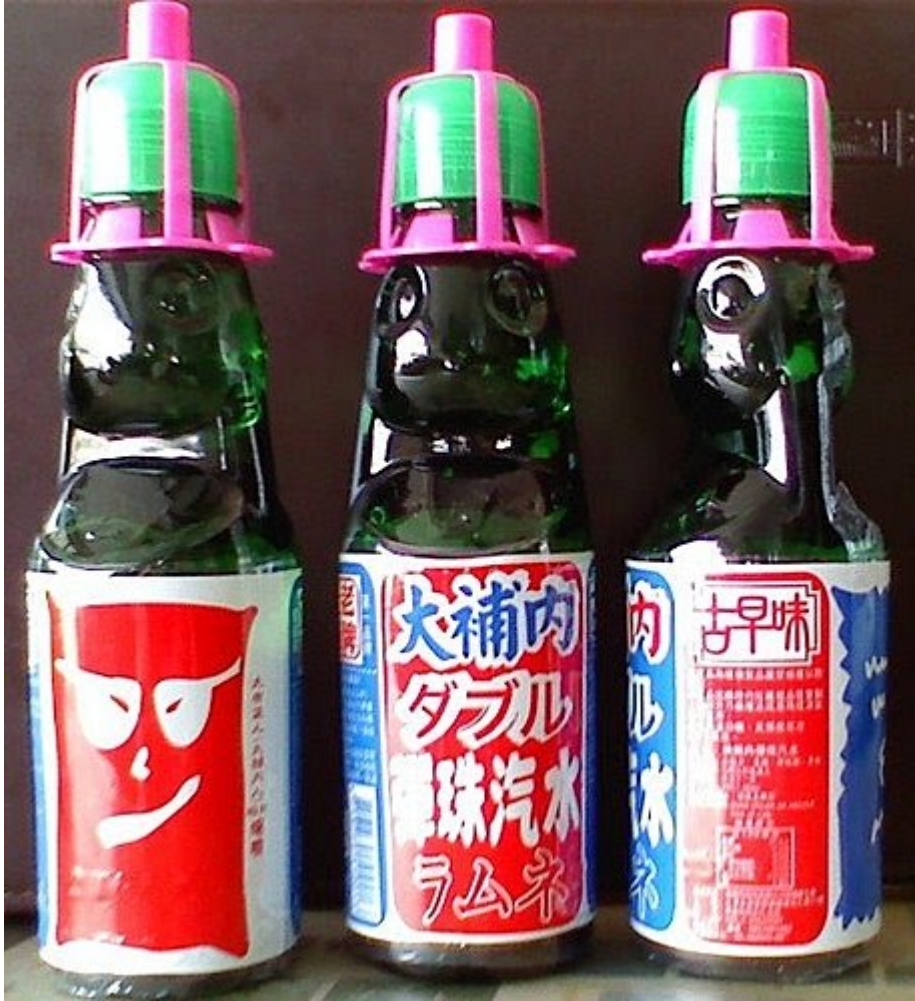

Marble soda

- Strongly disagree
- Disagree
- Slightly disagree
- Neutral
- Slightly agree
- Agree
- Strongly agree

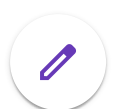



56. Please rate your familiarity with this image. \*

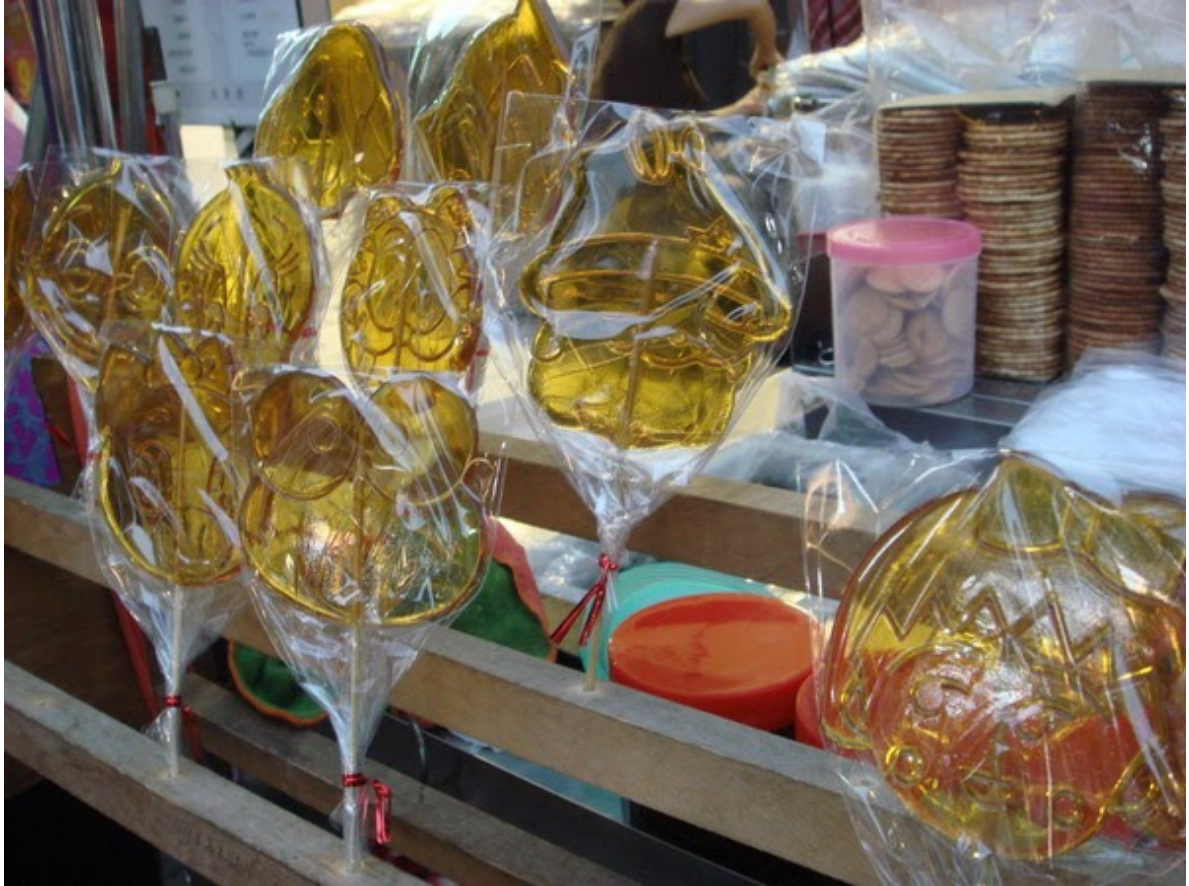

Maltose candy

- Strongly disagree
- Disagree
- Slightly disagree
- Neutral
- Slightly agree
- Agree
- Strongly agree

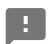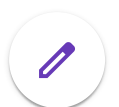

57. Please rate your familiarity with this image. \*

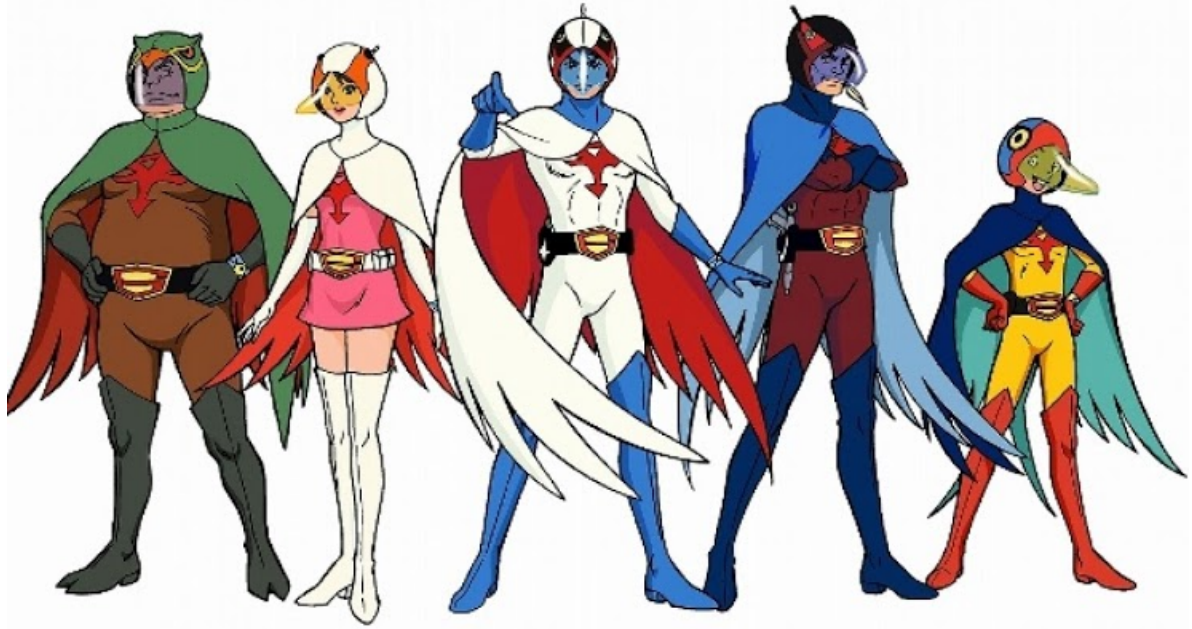

Science Ninja Team Gatchaman

- Strongly disagree
- Disagree
- Slightly disagree
- Neutral
- Slightly agree
- Agree
- Strongly agree

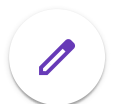

58. Please rate your familiarity with this image. \*

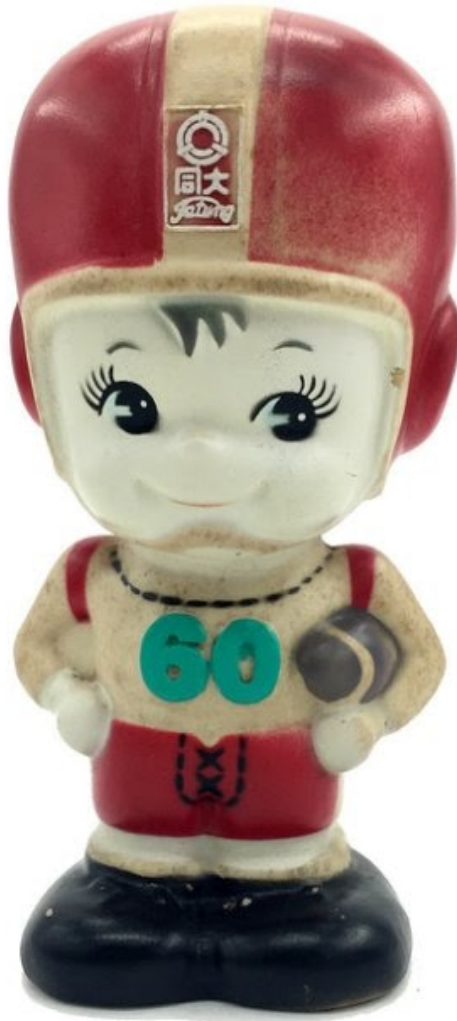

Toy figurine "Tatung Boy"

- Strongly disagree
- Disagree
- Slightly disagree
- Neutral
- Slightly agree
- Agree
- Strongly agree

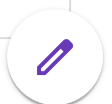

59. Please rate your familiarity with this image. \*

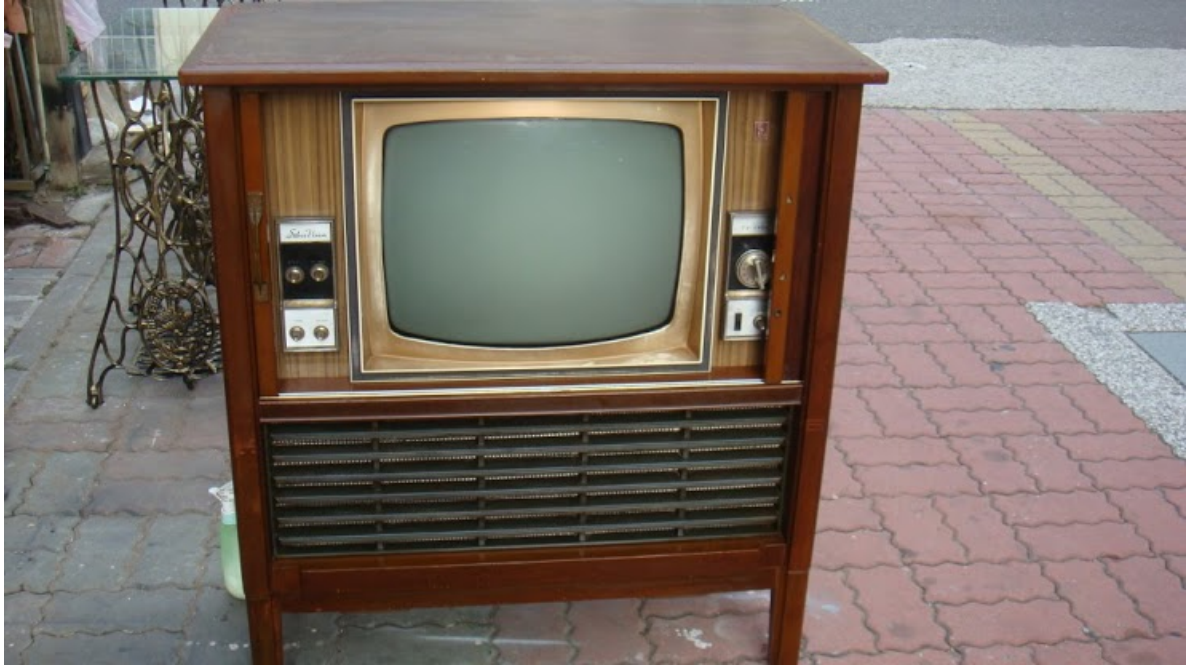

Television

- Strongly disagree
- Disagree
- Slightly disagree
- Neutral
- Slightly agree
- Agree
- Strongly agree

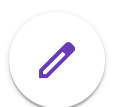



60. Please rate your familiarity with this image. \*

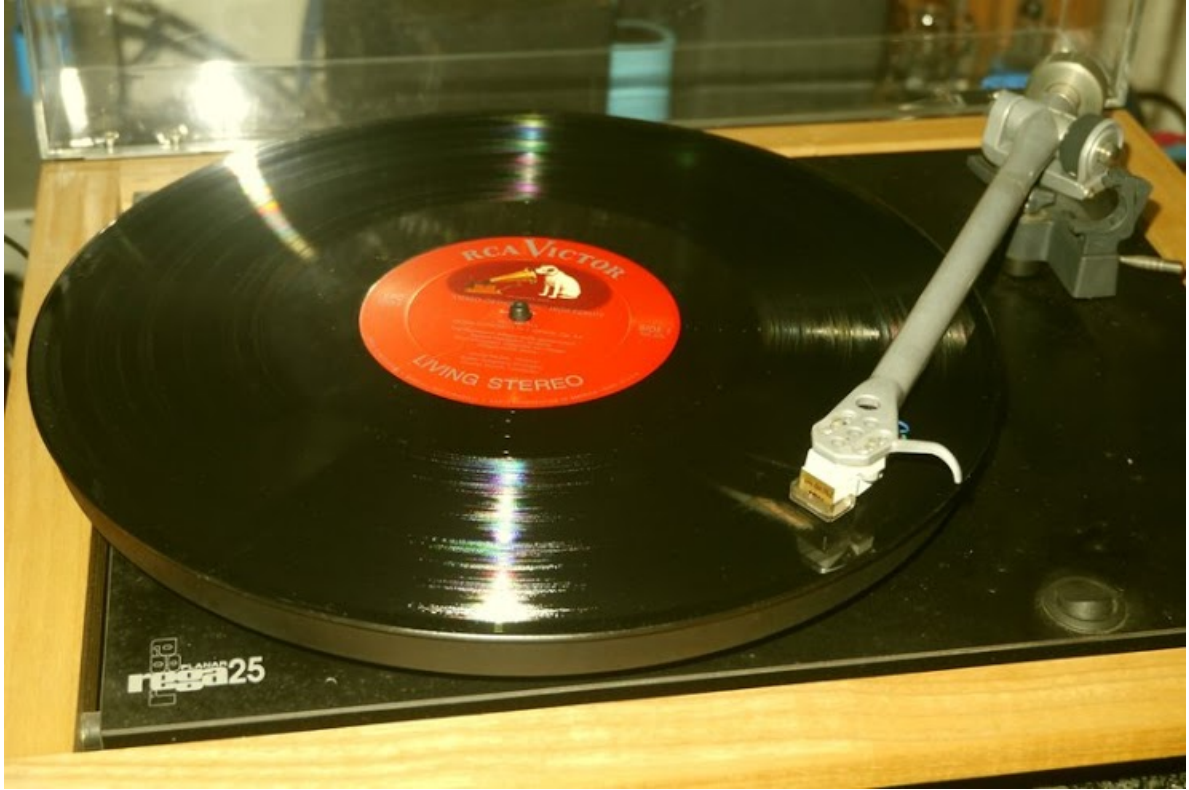

Vinyl records

- Strongly disagree
- Disagree
- Slightly disagree
- Neutral
- Slightly agree
- Agree
- Strongly agree

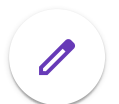

61. Please rate your familiarity with this image. \*

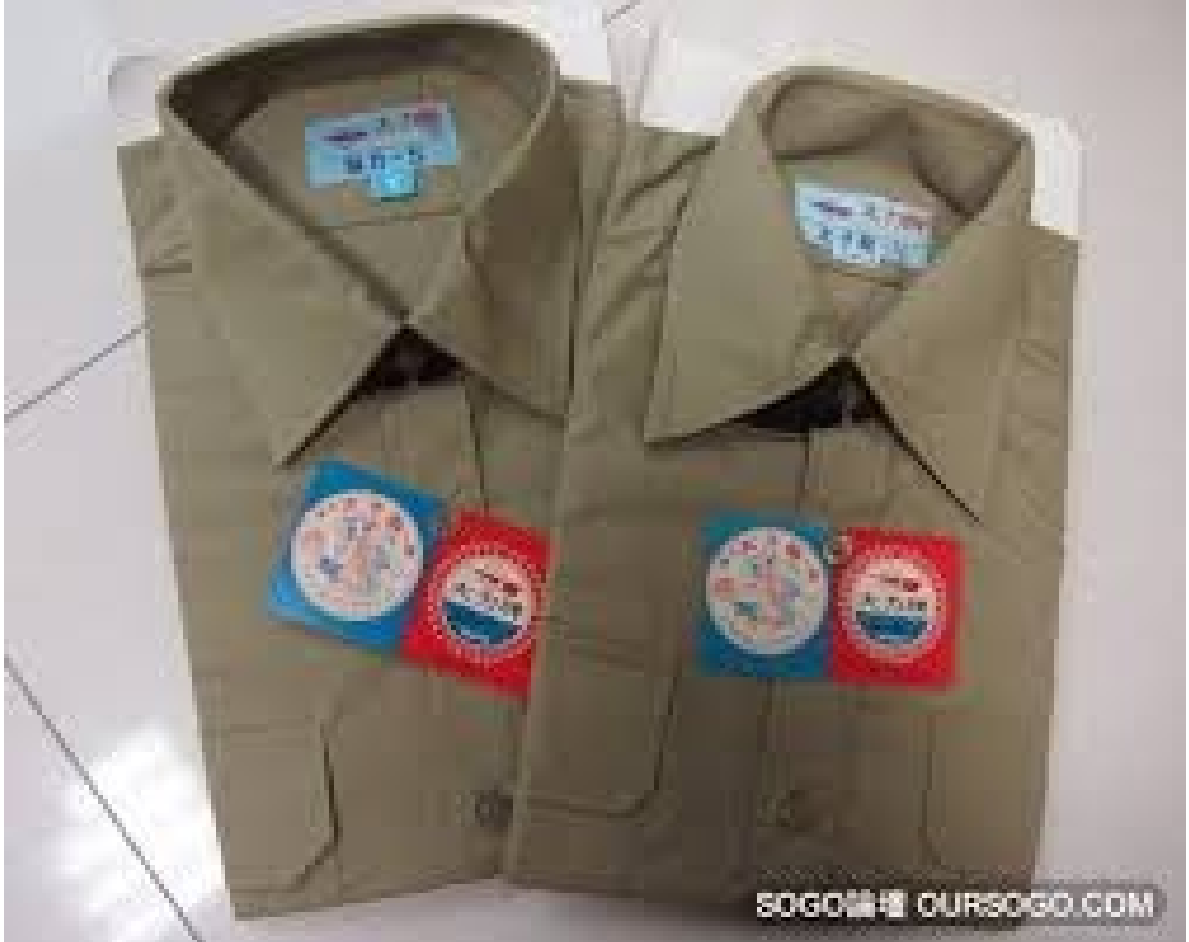

Student uniform

- Strongly disagree
- Disagree
- Slightly disagree
- Neutral
- Slightly agree
- Agree
- Strongly agree

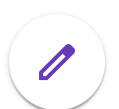

62. Please rate your familiarity with this image. \*

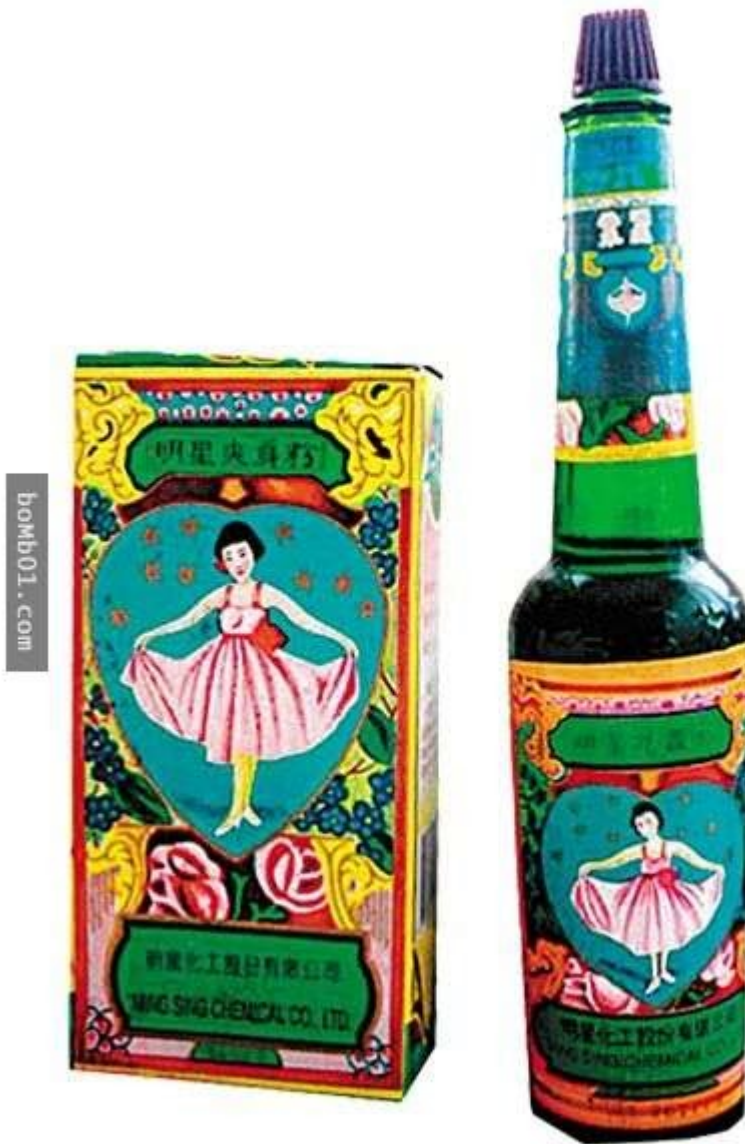

Traditional Taiwanese perfume

- Strongly disagree
- Disagree
- Slightly disagree
- Neutral
- Slightly agree
- Agree
- Strongly agree

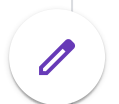

63. Please rate your familiarity with this image. \*

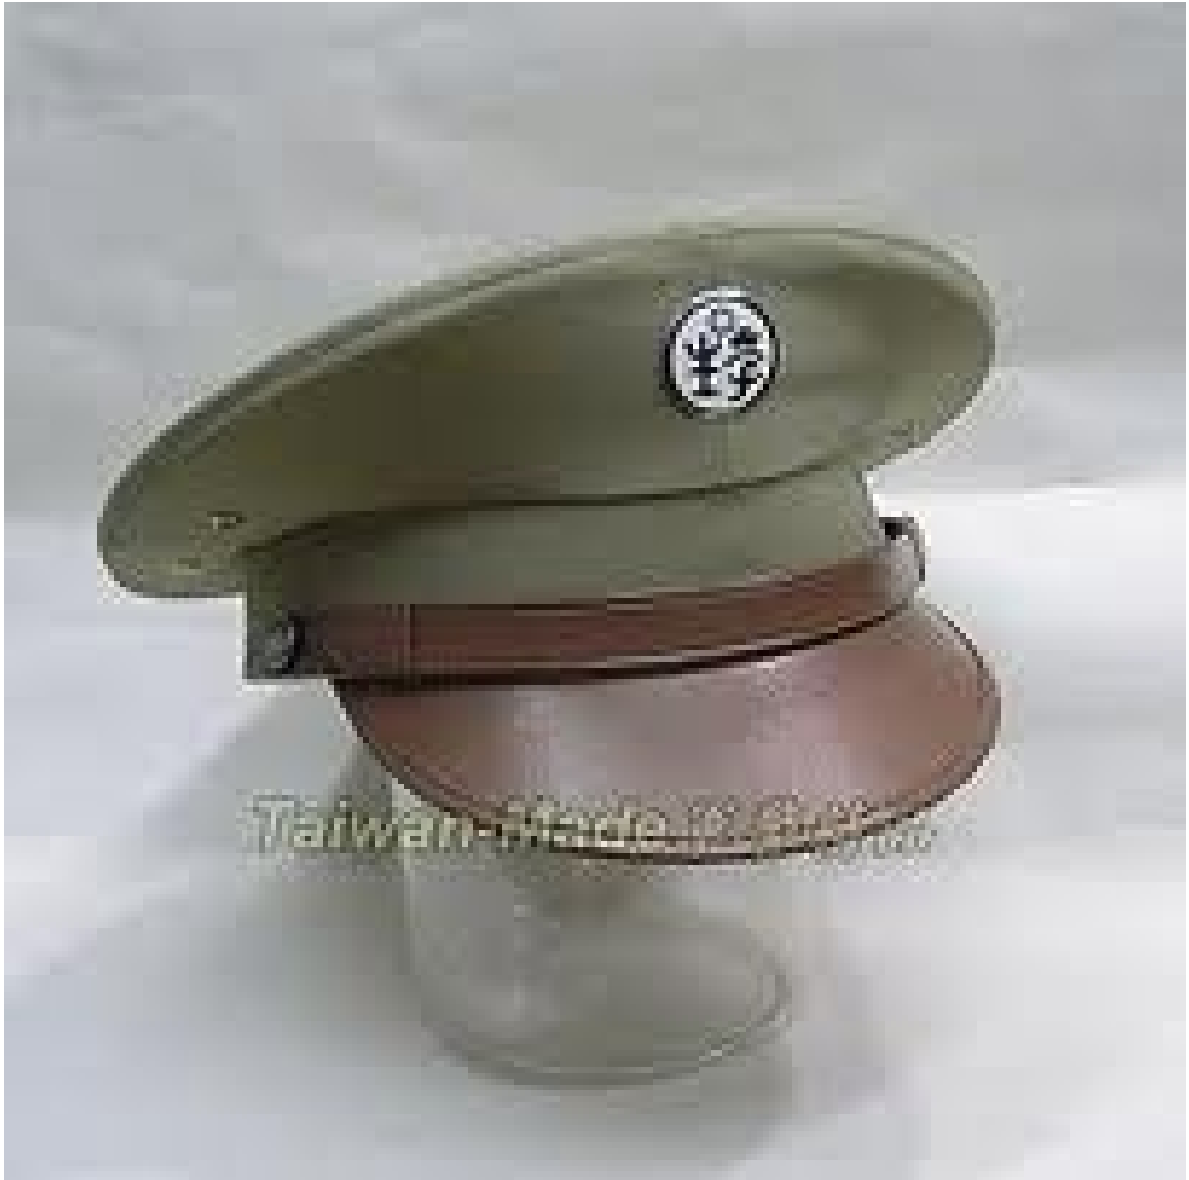

Peaked cap

- Strongly disagree
- Disagree
- Slightly disagree
- Neutral
- Slightly agree
- Agree
- Strongly agree

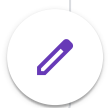



64. Please rate your familiarity with this image. \*

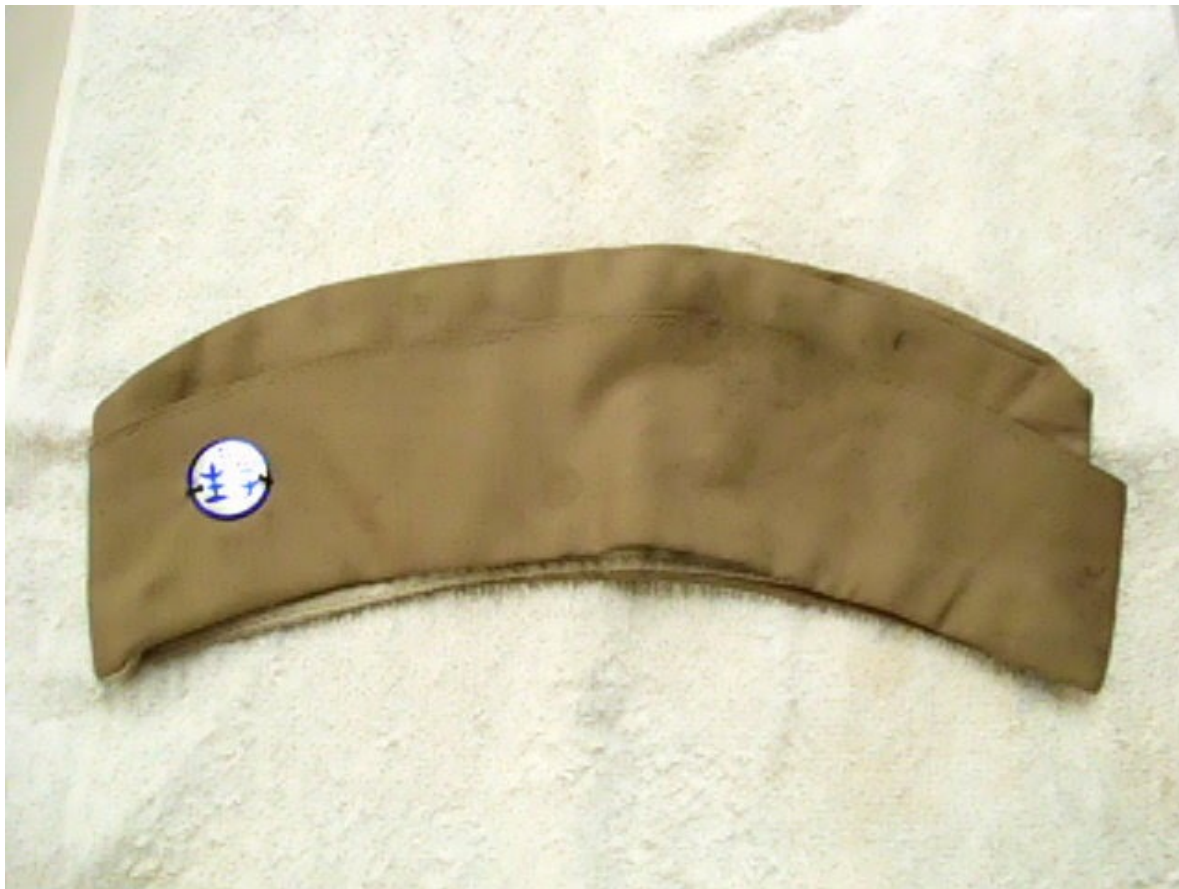

Boat cap

- Strongly disagree
- Disagree
- Slightly disagree
- Neutral
- Slightly agree
- Agree
- Strongly agree

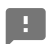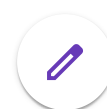

65. Please rate your familiarity with this image. \*

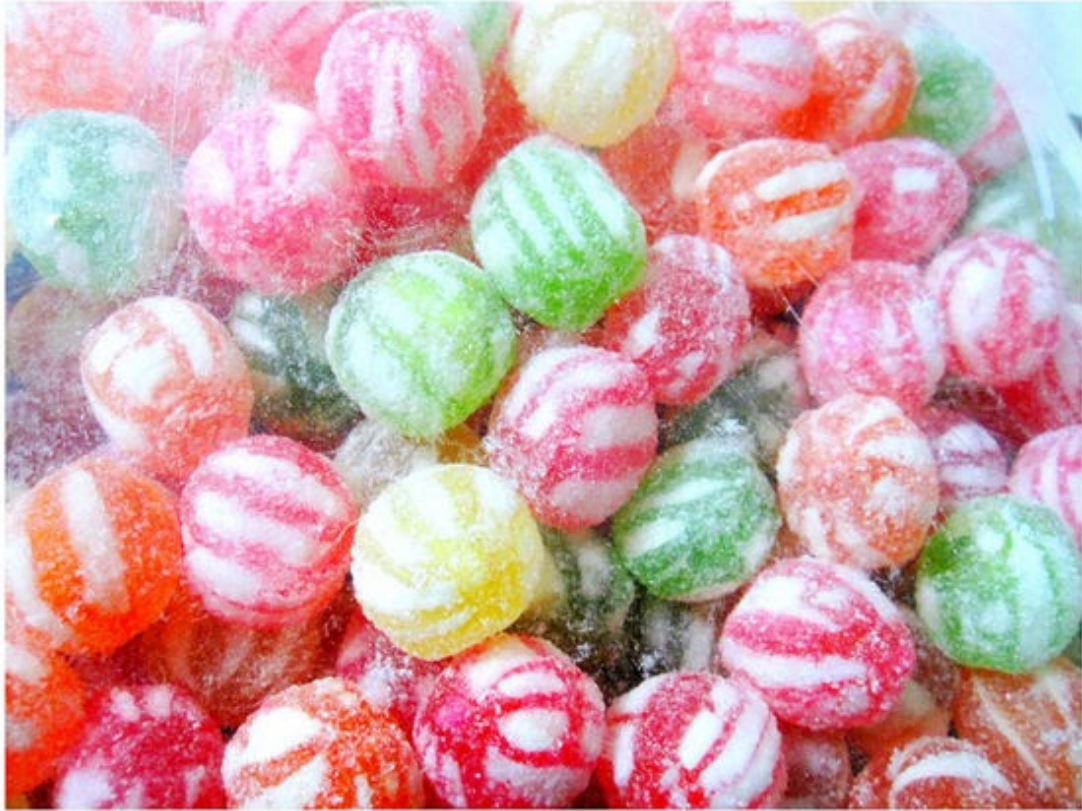

Japanese candy 'Konpetio'

- Strongly disagree
- Disagree
- Slightly disagree
- Neutral
- Slightly agree
- Agree
- Strongly agree

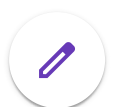

66. Please rate your familiarity with this image. \*

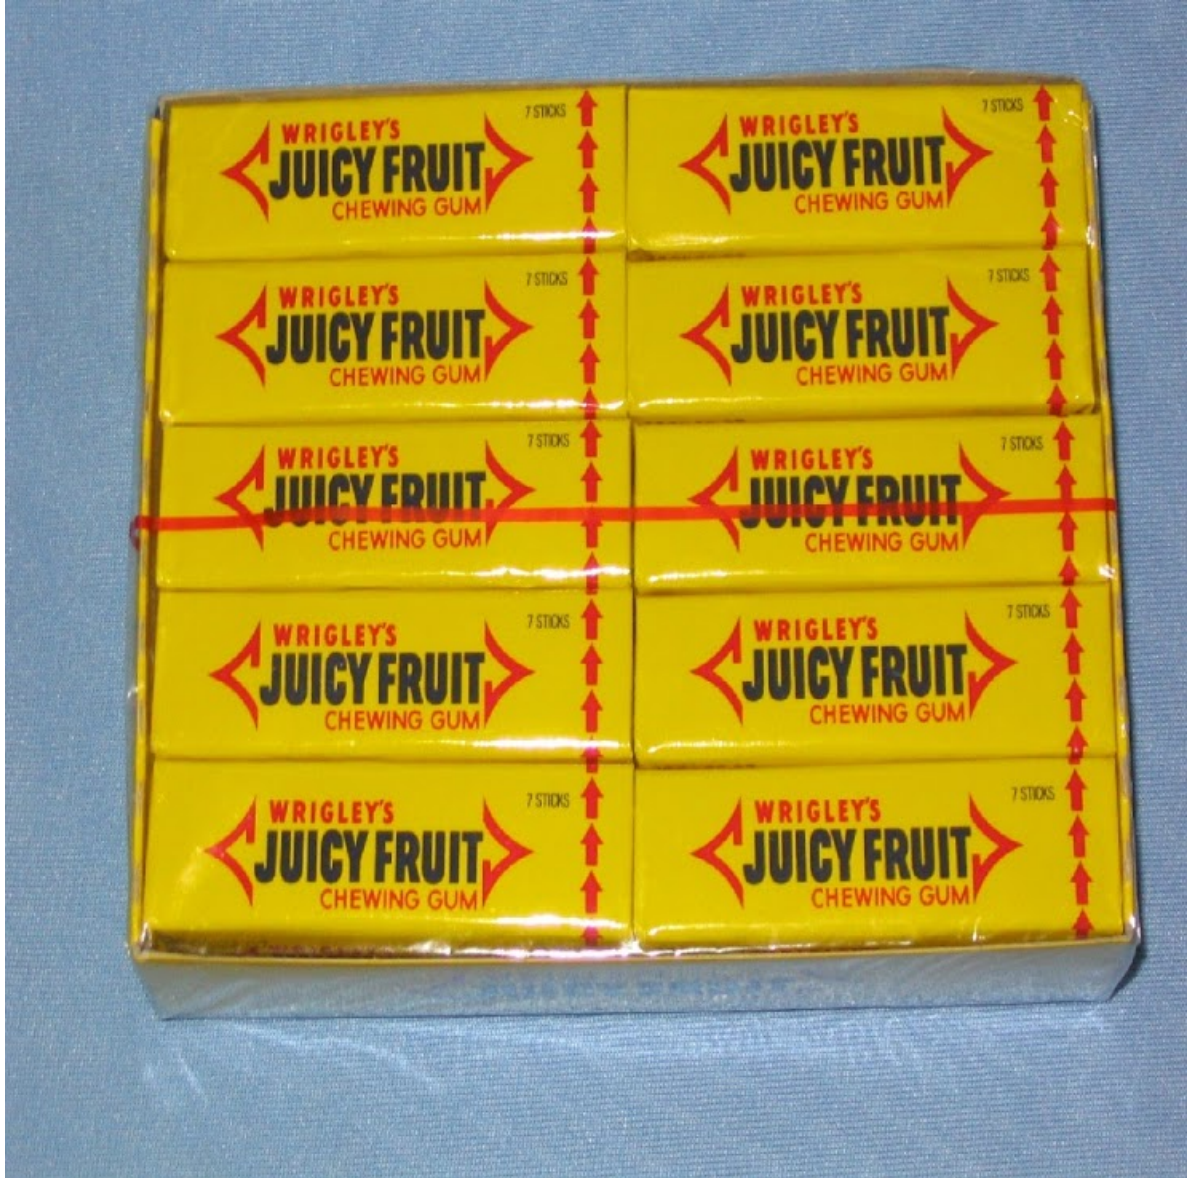

Juicy Fruit chewing gum

- Strongly disagree
- Disagree
- Slightly disagree
- Neutral
- Slightly agree
- Agree
- Strongly agree

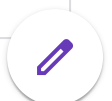



67. Please rate your familiarity with this image. \*

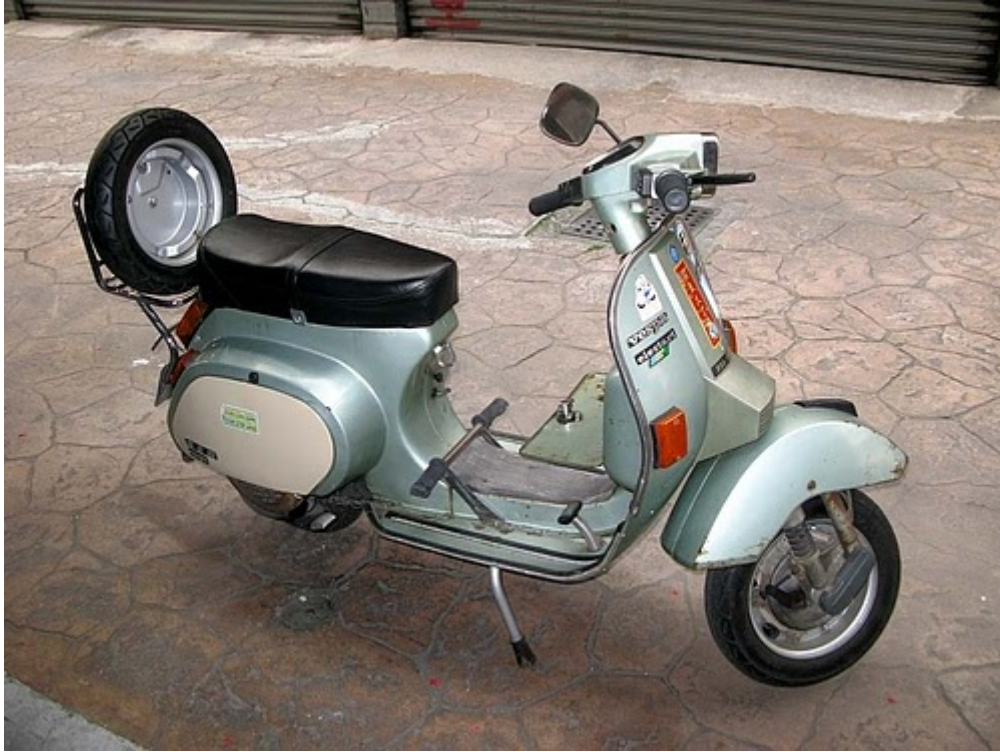

Vespa scooter

- Strongly disagree
- Disagree
- Slightly disagree
- Neutral
- Slightly agree
- Agree
- Strongly agree

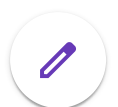



68. Please rate your familiarity with this image. \*

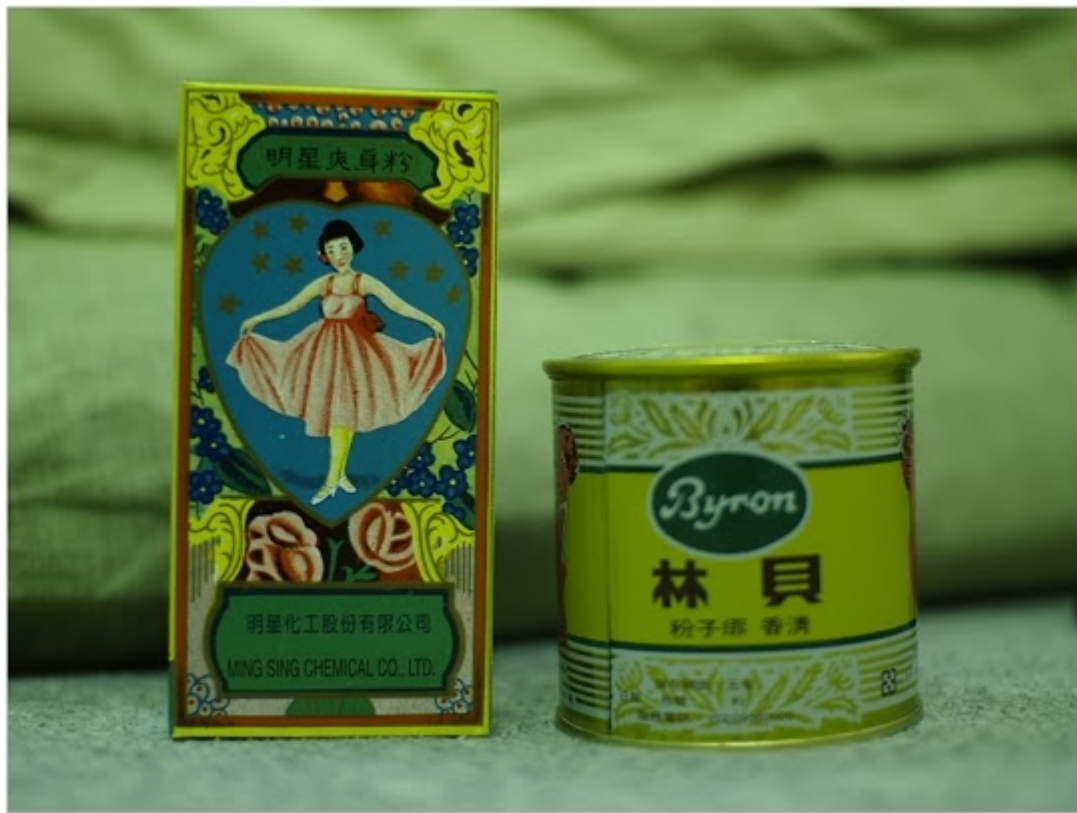

OLYMPUS IMAGING CORP. E-500 wall002

Baby powder

- Strongly disagree
- Disagree
- Slightly disagree
- Neutral
- Slightly agree
- Agree
- Strongly agree

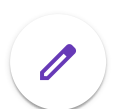

69. Please rate your familiarity with this image. \*

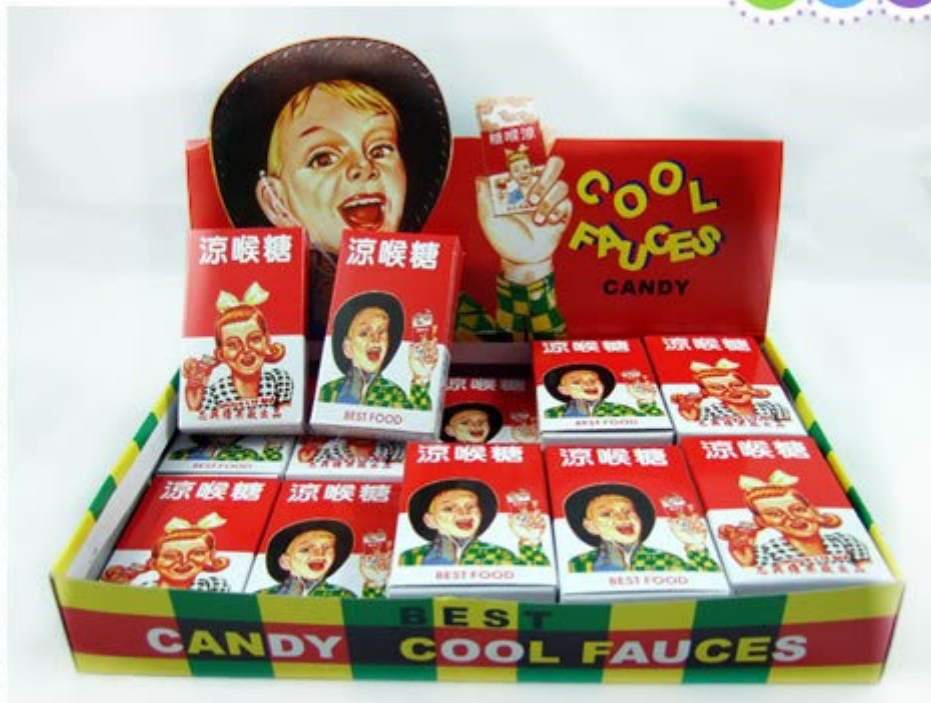

Cool Fauces Candy

- Strongly disagree
- Disagree
- Slightly disagree
- Neutral
- Slightly agree
- Agree
- Strongly agree

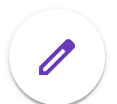

70. Please rate your familiarity with this image. \*

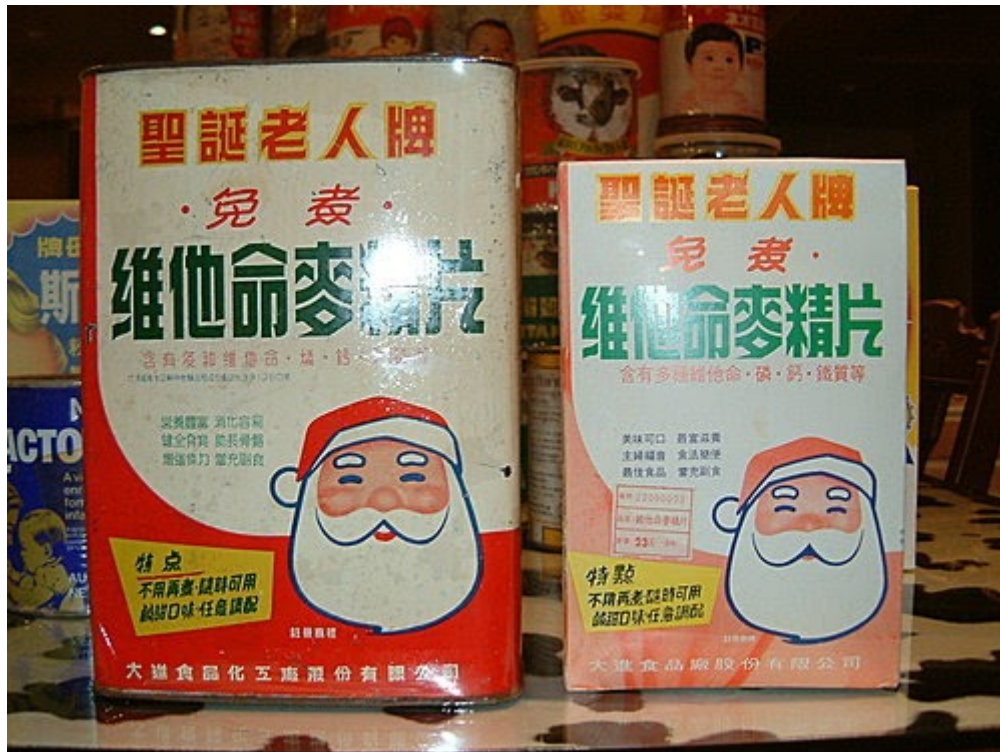

Santa Clause brand oatmeal

- Strongly disagree
- Disagree
- Slightly disagree
- Neutral
- Slightly agree
- Agree
- Strongly agree

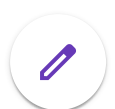

71. Please rate your familiarity with this image. \*

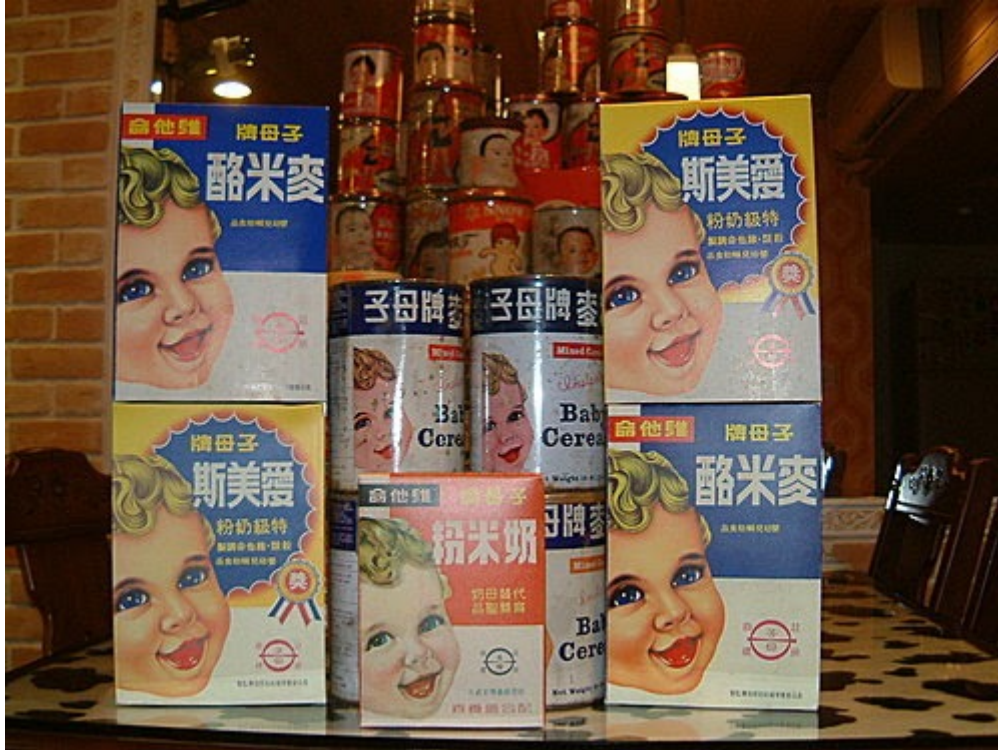

Mother-Son brand milk powder

- Strongly disagree
- Disagree
- Slightly disagree
- Neutral
- Slightly agree
- Agree
- Strongly agree

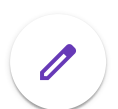



72. Please rate your familiarity with this image. \*

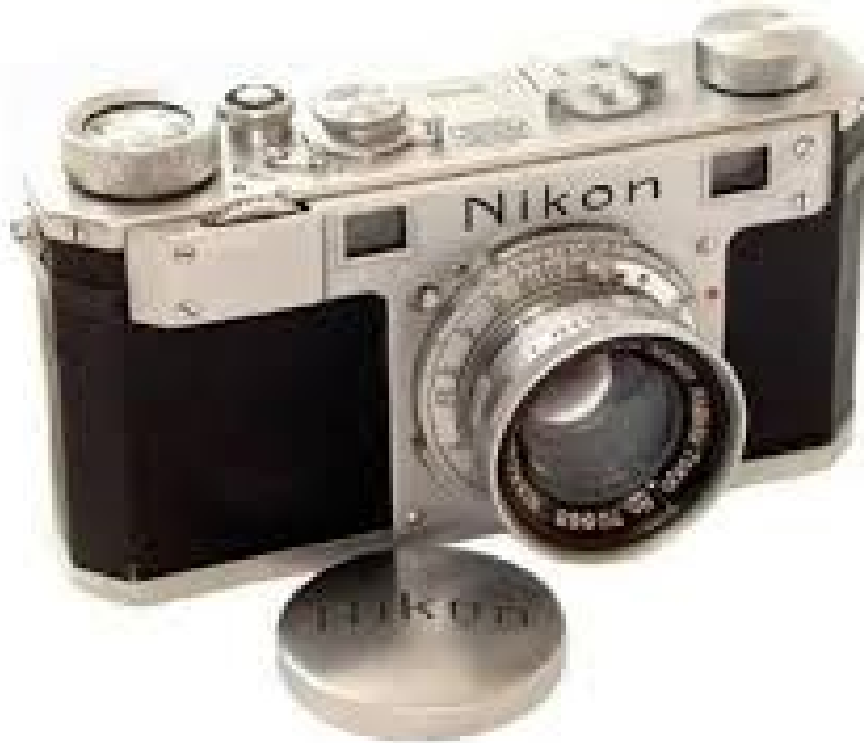

Film camera

- Strongly disagree
- Disagree
- Slightly disagree
- Neutral
- Slightly agree
- Agree
- Strongly agree

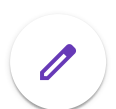

73. Please rate your familiarity with this image. \*

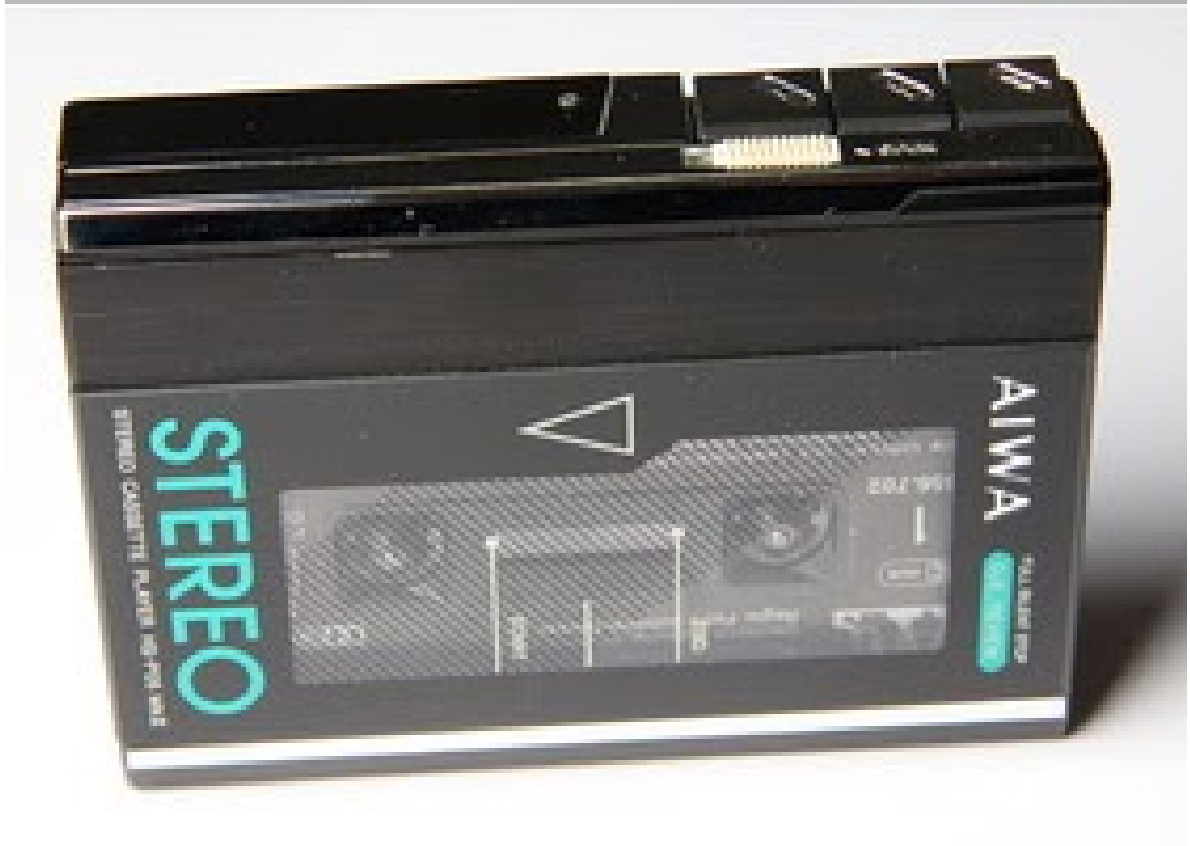

Audio cassette

- Strongly disagree
- Disagree
- Slightly disagree
- Neutral
- Slightly agree
- Agree
- Strongly agree

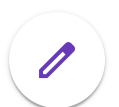

74. Please rate your familiarity with this image. \*

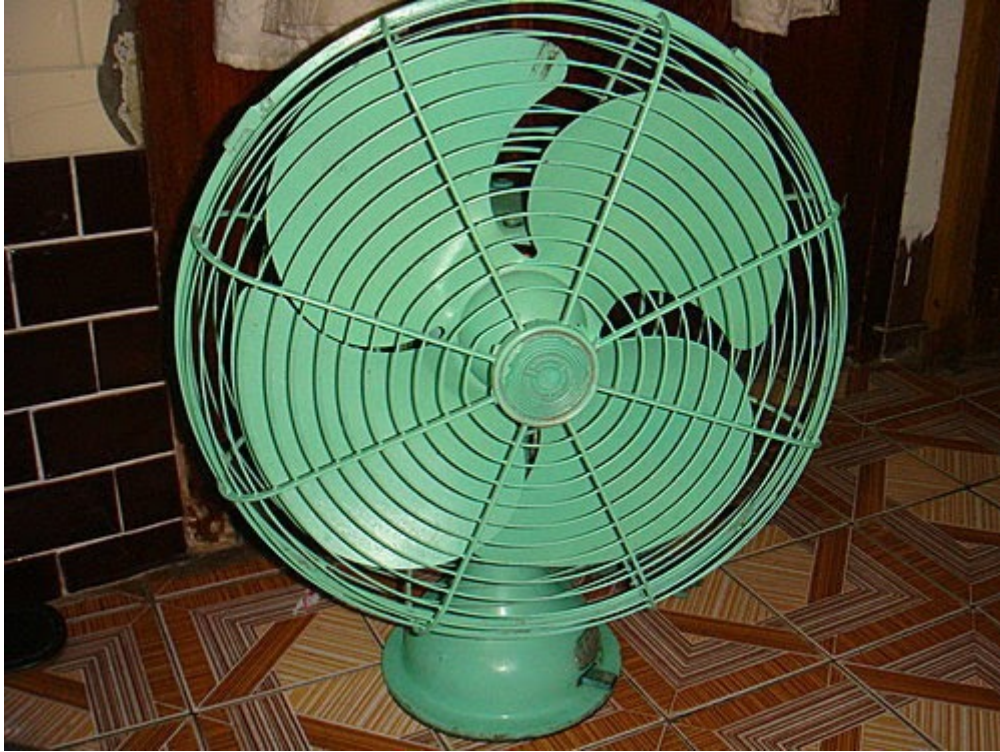

Tatung brand electric fan

- Strongly disagree
- Disagree
- Slightly disagree
- Neutral
- Slightly agree
- Agree
- Strongly agree

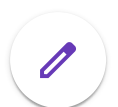

75. Please rate your familiarity with this image. \*

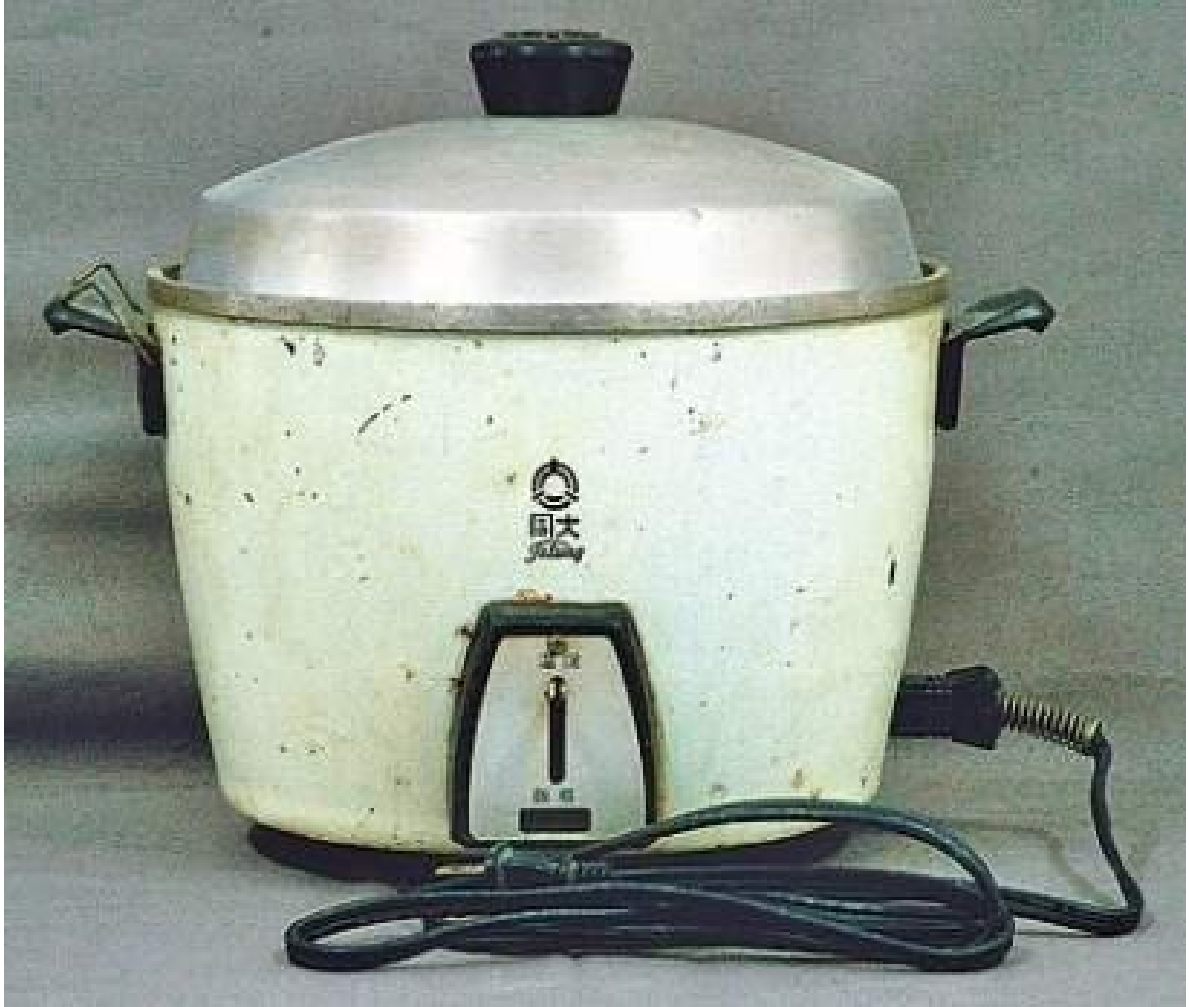

Automatic cooker and steamer

- Strongly disagree
- Disagree
- Slightly disagree
- Neutral
- Slightly agree
- Agree
- Strongly agree

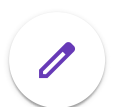



76. Please rate your familiarity with this image. \*

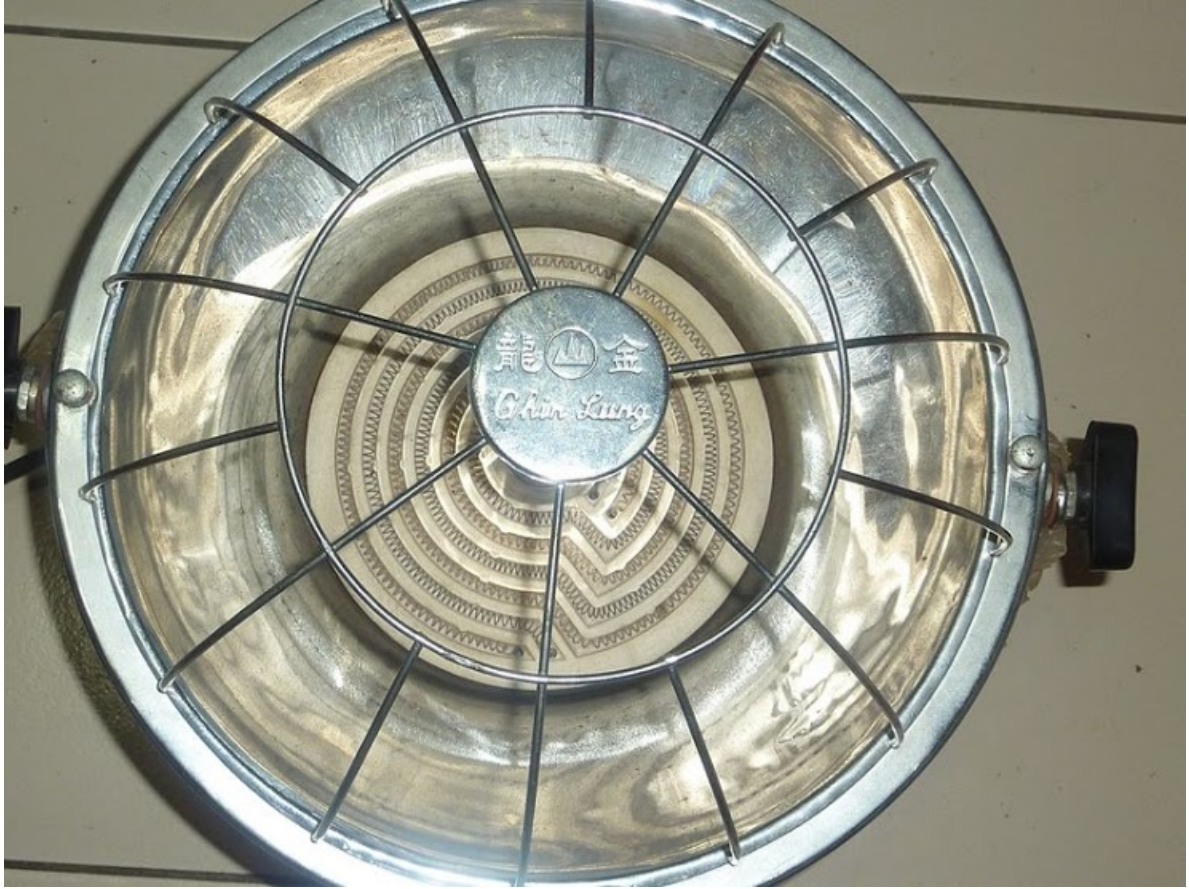

Tungsten electric heater

- Strongly disagree
- Disagree
- Slightly disagree
- Neutral
- Slightly agree
- Agree
- Strongly agree

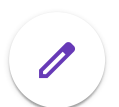

77. Please rate your familiarity with this image. \*

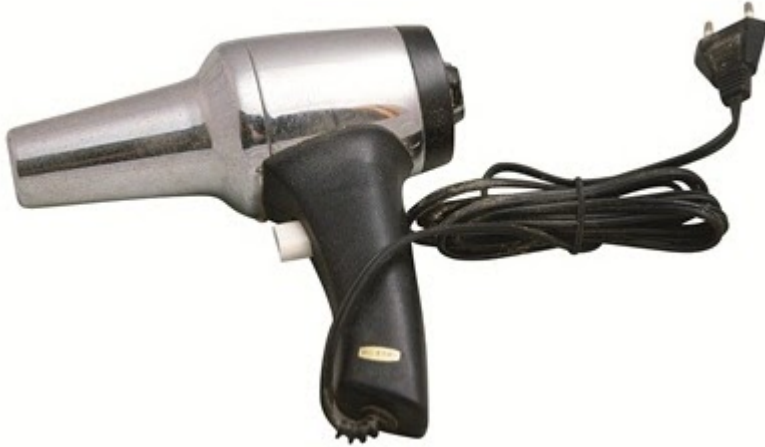

Hairdryer

- Strongly disagree
- Disagree
- Slightly disagree
- Neutral
- Slightly agree
- Agree
- Strongly agree

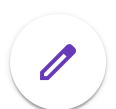

78. Please rate your familiarity with this image. \*

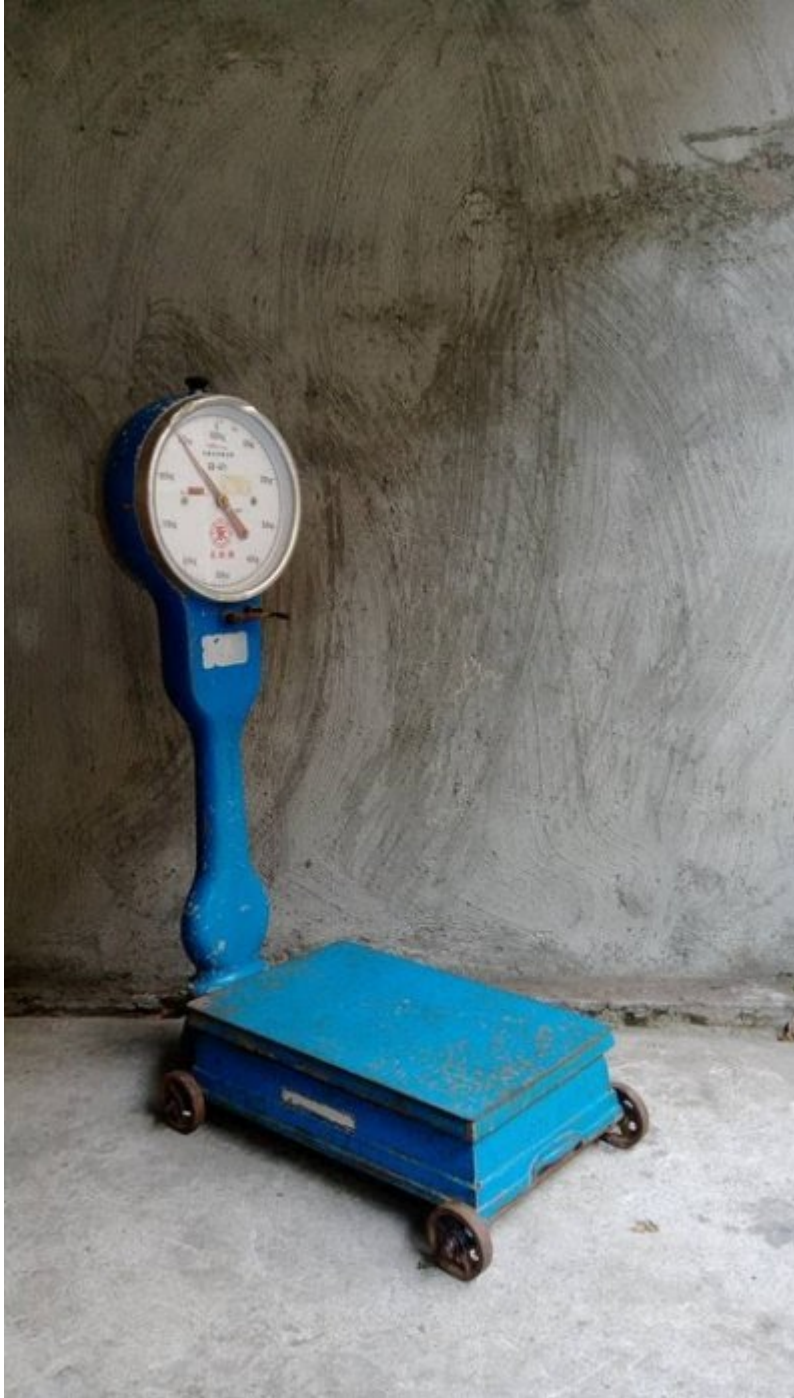

Weight scale

- Strongly disagree
- Disagree
- Slightly disagree
- Neutral
- Slightly agree
- Agree

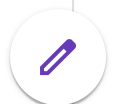

Strongly agree

79. Please rate your familiarity with this image. \*

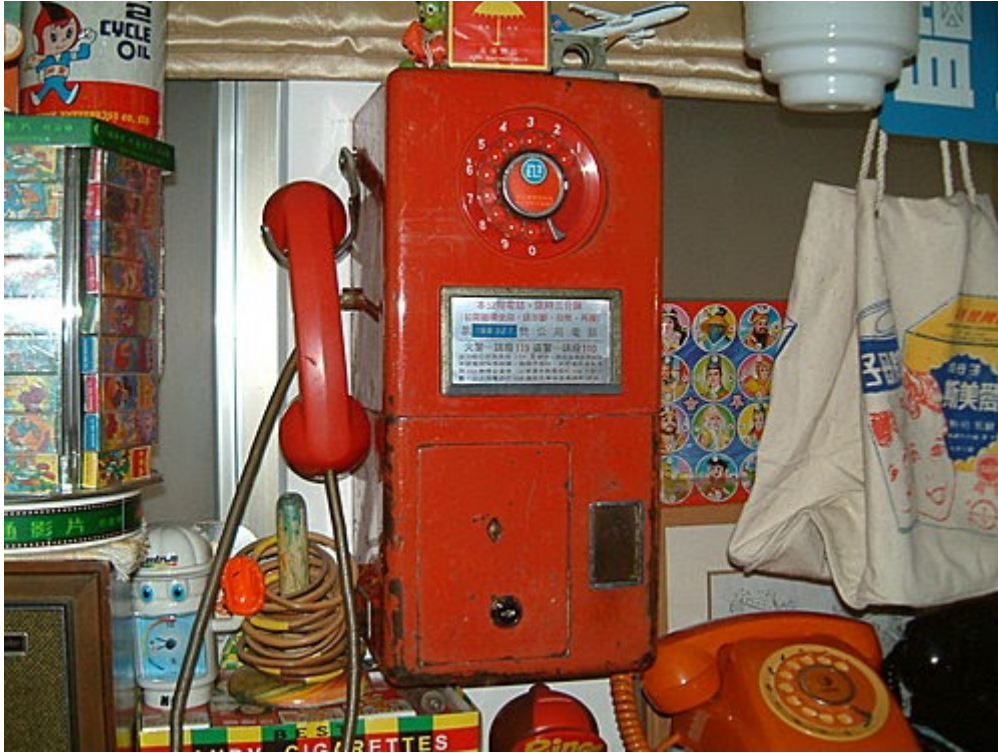

Rotary pay phone

- Strongly disagree
- Disagree
- Slightly disagree
- Neutral
- Slightly agree
- Agree
- Strongly agree

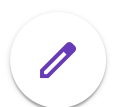



80. Please rate your familiarity with this image. \*

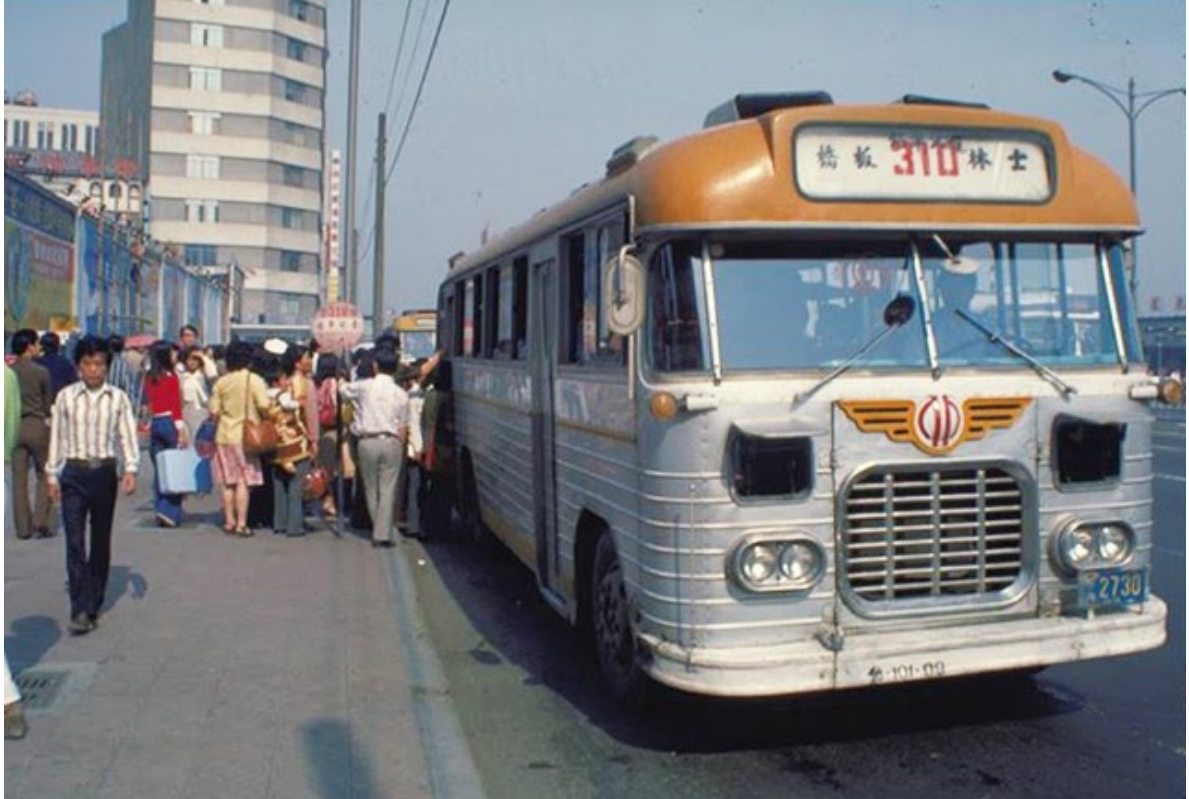

Public bus

- Strongly disagree
- Disagree
- Slightly disagree
- Neutral
- Slightly agree
- Agree
- Strongly agree

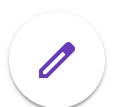

81. Please rate your familiarity with this image. \*

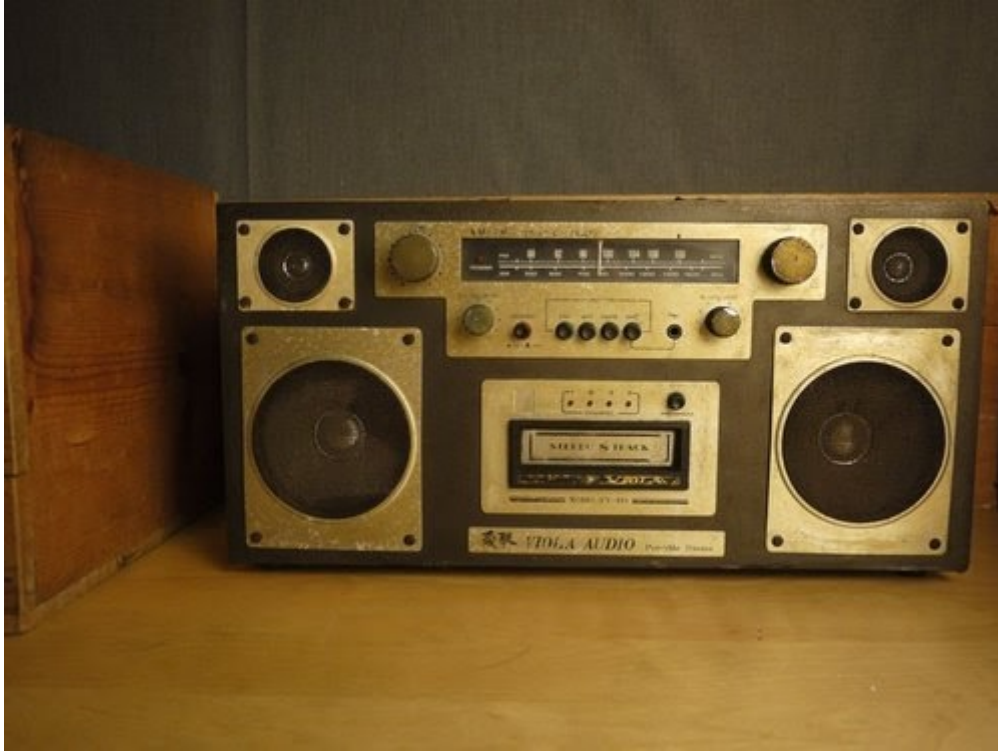

Radio

- Strongly disagree
- Disagree
- Slightly disagree
- Neutral
- Slightly agree
- Agree
- Strongly agree

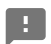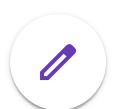

82. Please rate your familiarity with this image. \*

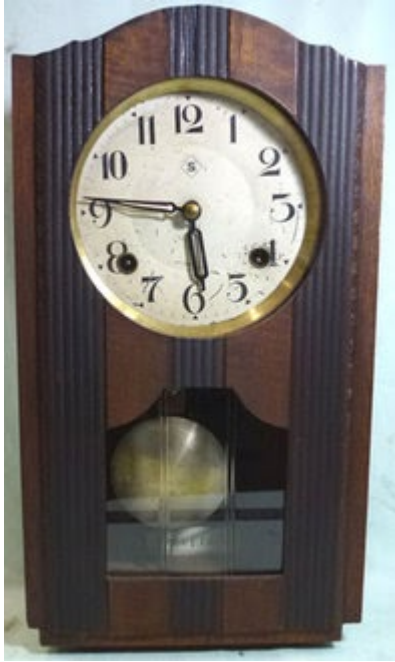

Pendulum clock

- Strongly disagree
- Disagree
- Slightly disagree
- Neutral
- Slightly agree
- Agree
- Strongly agree

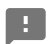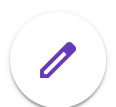

83. Please rate your familiarity with this image. \*

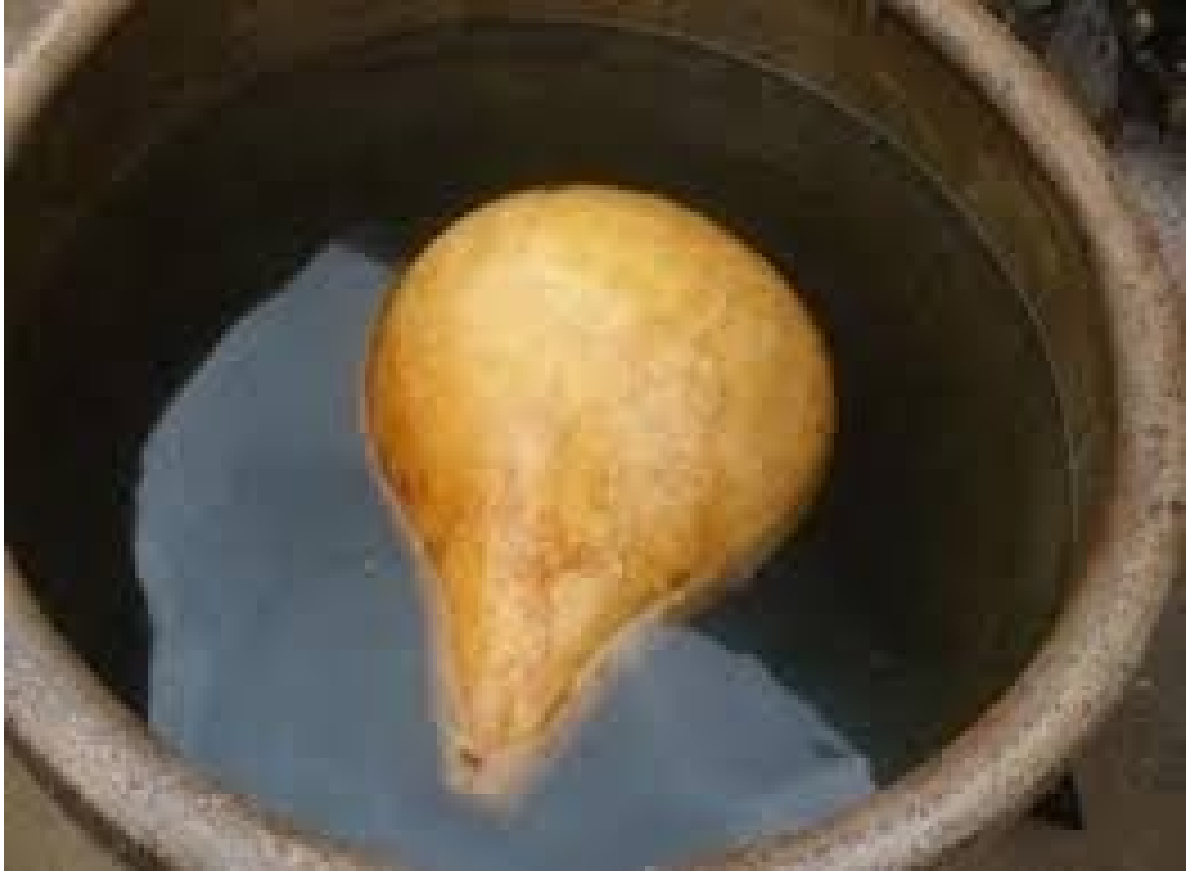

Wood water scoop

- Strongly disagree
- Disagree
- Slightly disagree
- Neutral
- Slightly agree
- Agree
- Strongly agree

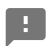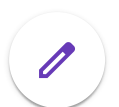



84. Please rate your familiarity with this image. \*

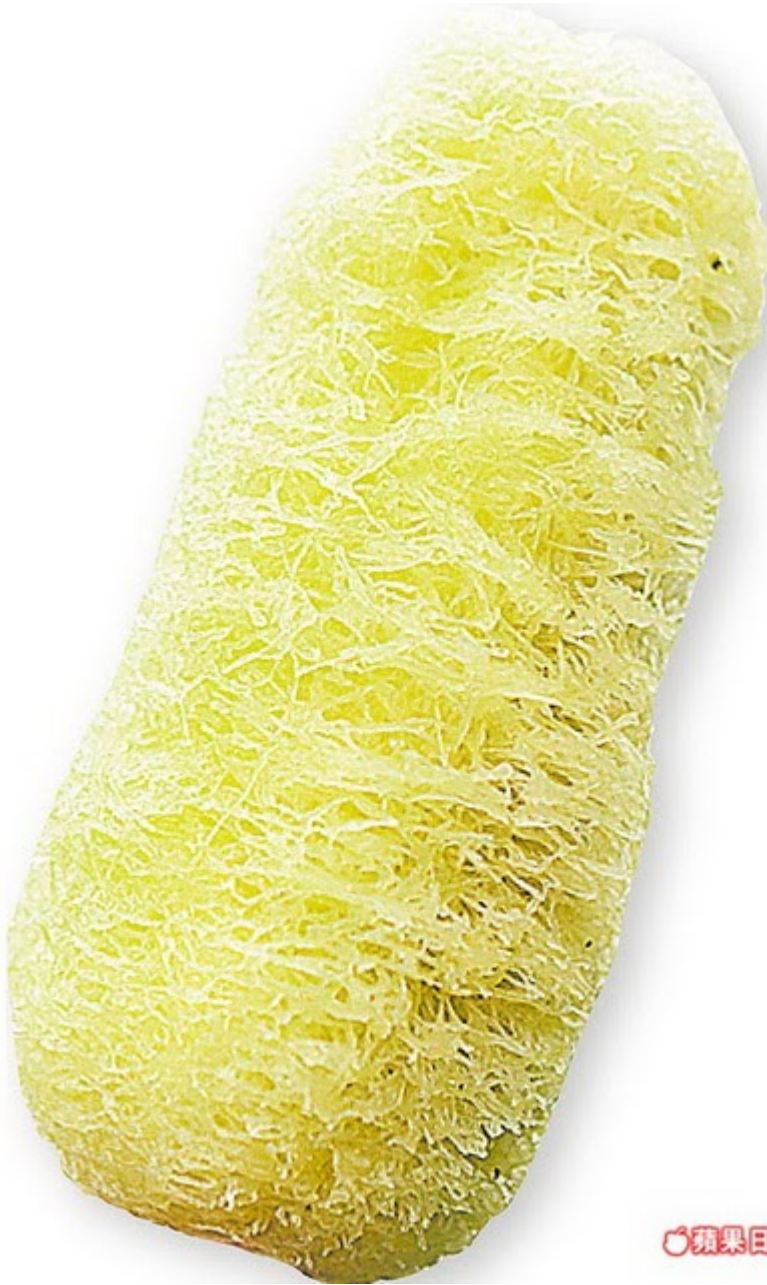

Loofah cloth

- Strongly disagree
- Disagree
- Slightly disagree
- Neutral
- Slightly agree
- Agree
- Strongly agree

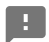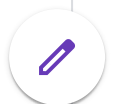

85. Please rate your familiarity with this image. \*

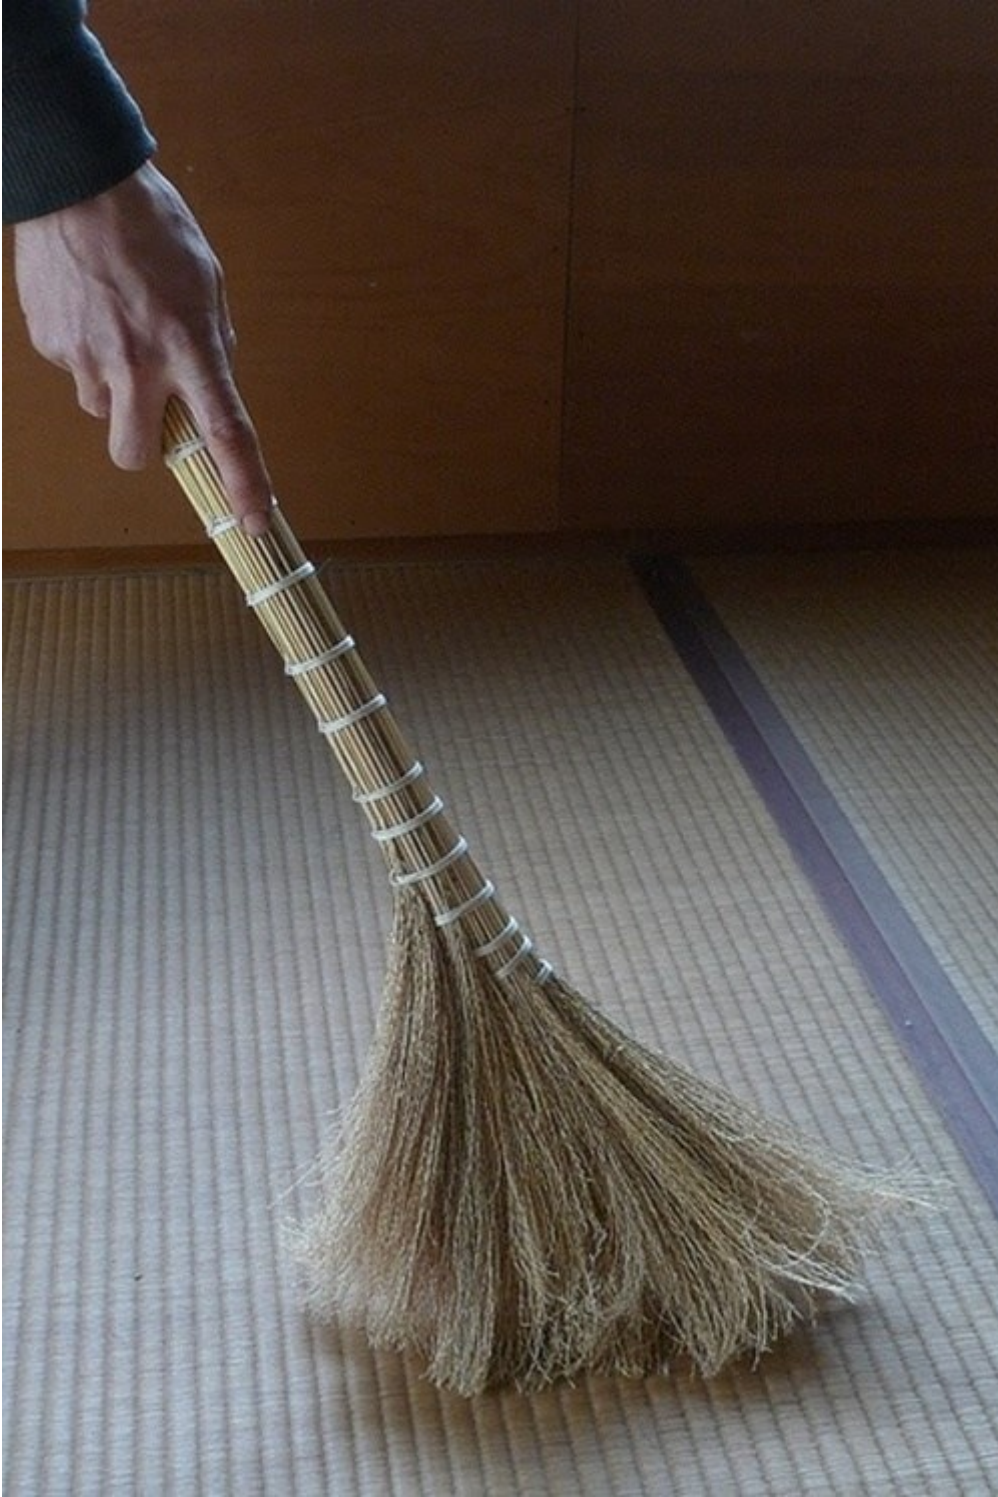

Straw broom

- Strongly disagree
- Disagree
- Slightly disagree
- Neutral
- Slightly agree

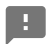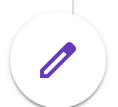

- Agree
- Strongly agree

86. Please rate your familiarity with this image. \*

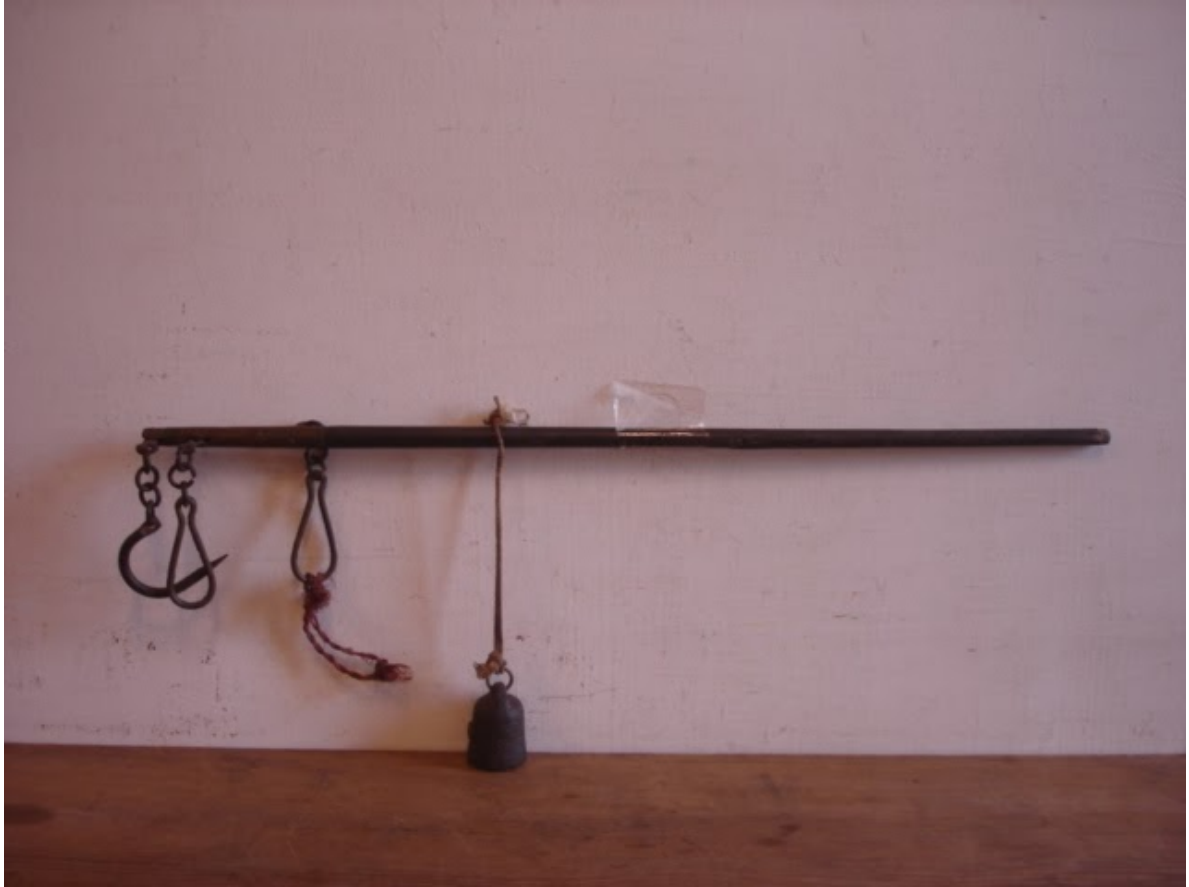

Steelyard

- Strongly disagree
- Disagree
- Slightly disagree
- Neutral
- Slightly agree
- Agree
- Strongly agree

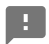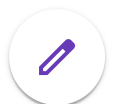



87. Please rate your familiarity with this image. \*

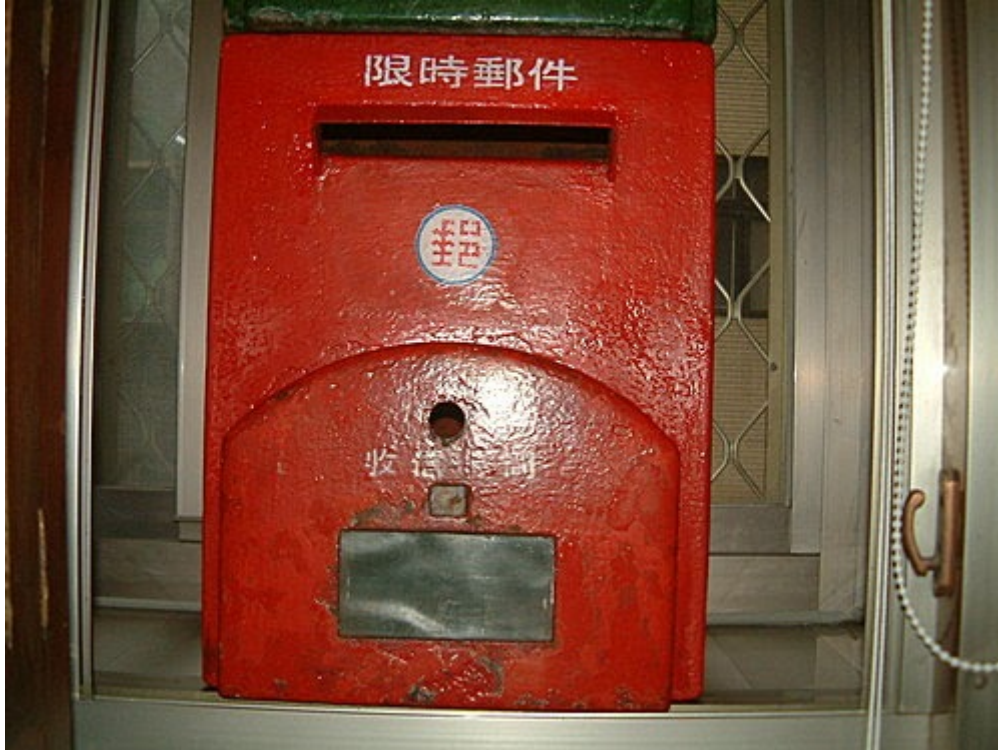

Postbox

- Strongly disagree
- Disagree
- Slightly disagree
- Neutral
- Slightly agree
- Agree
- Strongly agree

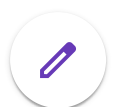



88. Please rate your familiarity with this image. \*

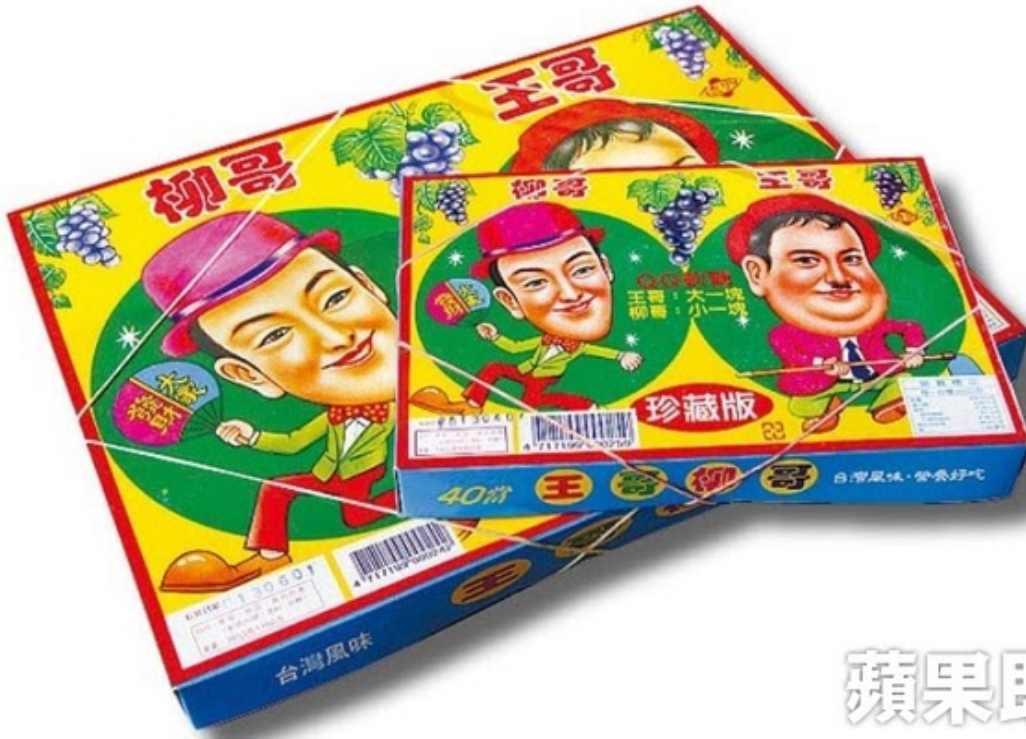

蘋果即時

Soft candy

- Strongly disagree
- Disagree
- Slightly disagree
- Neutral
- Slightly agree
- Agree
- Strongly agree

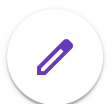

89. Please rate your familiarity with this image. \*

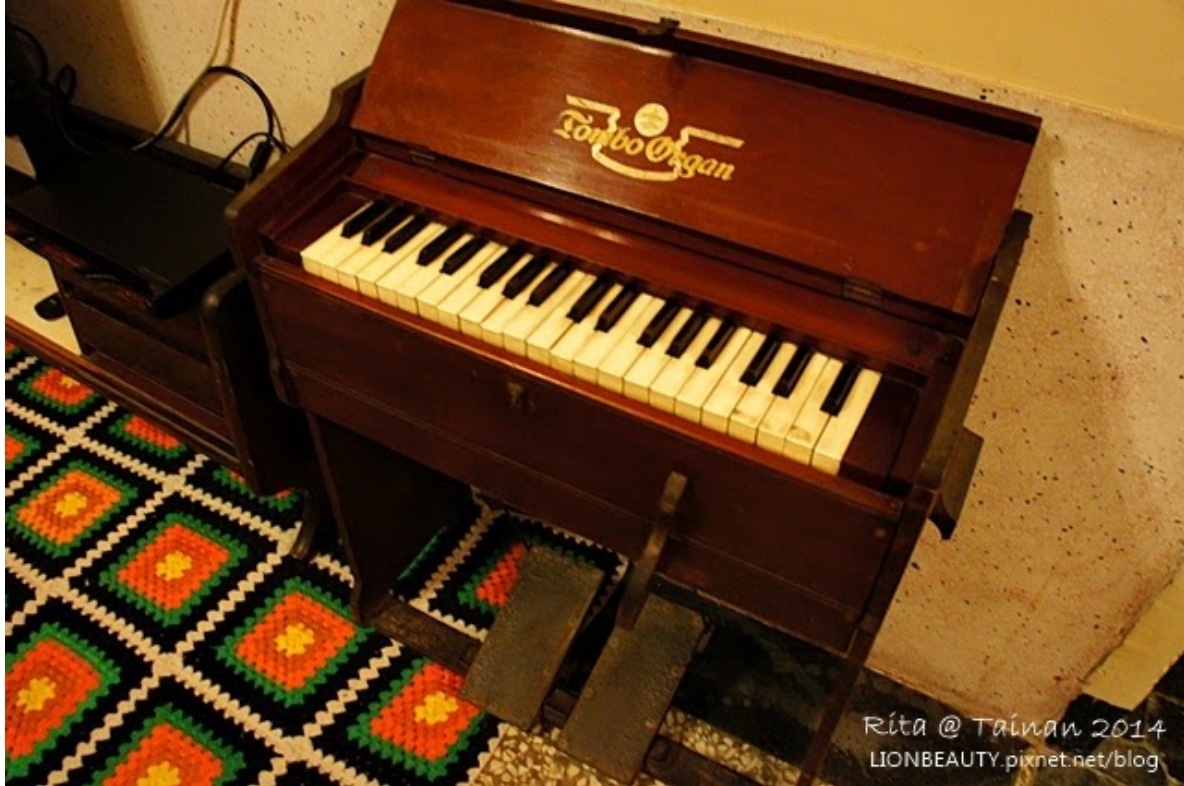

Reed organ

- Strongly disagree
- Disagree
- Slightly disagree
- Neutral
- Slightly agree
- Agree
- Strongly agree

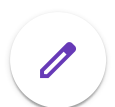

90. Please rate your familiarity with this image. \*

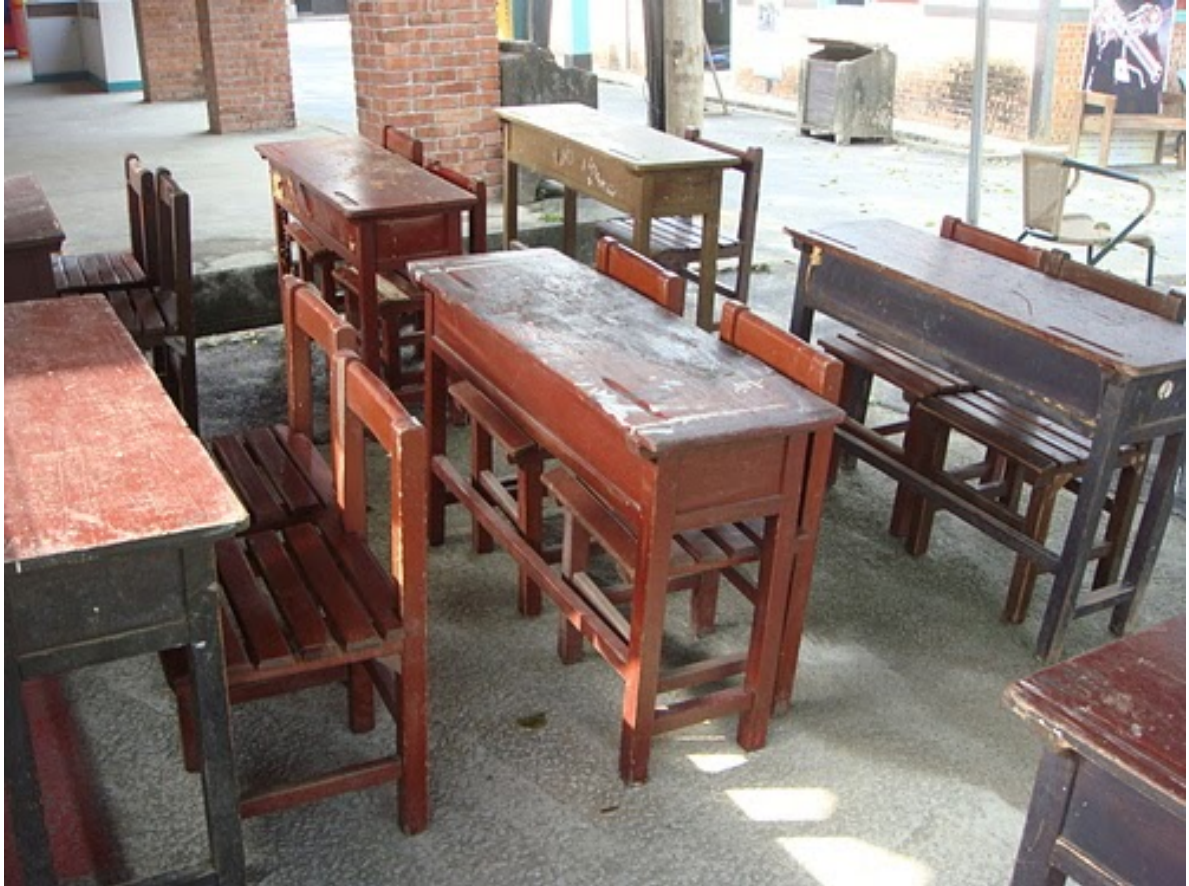

School desks and chairs

- Strongly disagree
- Disagree
- Slightly disagree
- Neutral
- Slightly agree
- Agree
- Strongly agree

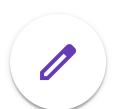

91. Please rate your familiarity with this image. \*

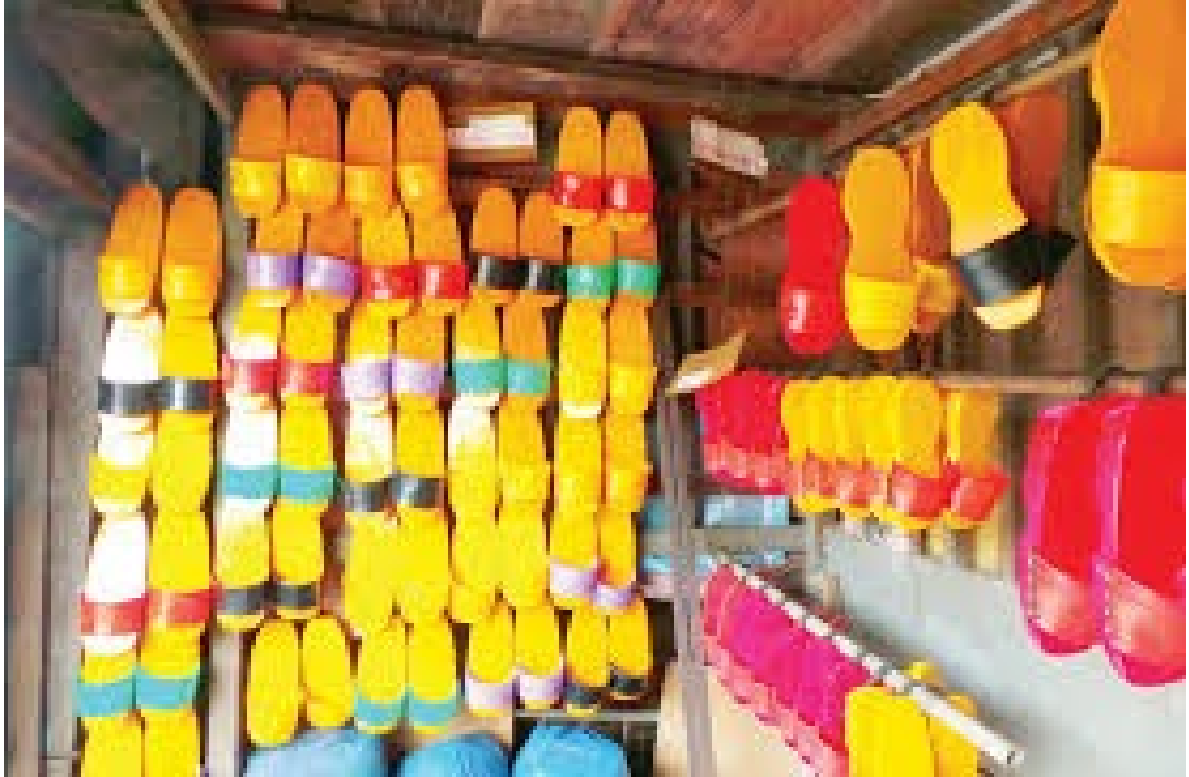

Wood clogs

- Strongly disagree
- Disagree
- Slightly disagree
- Neutral
- Slightly agree
- Agree
- Strongly agree

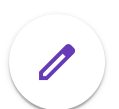



92. Please rate your familiarity with this image. \*

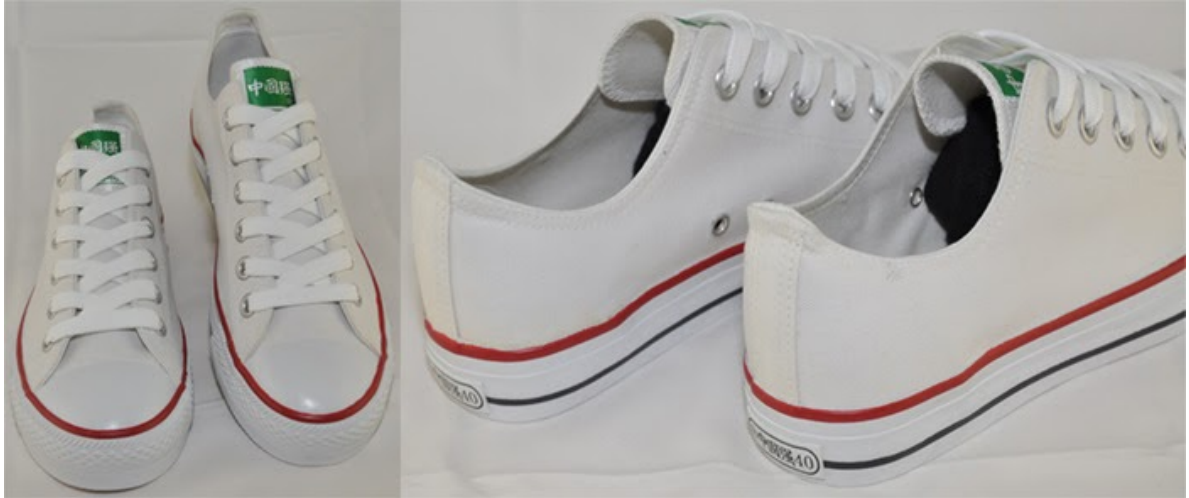

Sneakers

- Strongly disagree
- Disagree
- Slightly disagree
- Neutral
- Slightly agree
- Agree
- Strongly agree

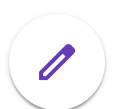

93. Please rate your familiarity with this image. \*

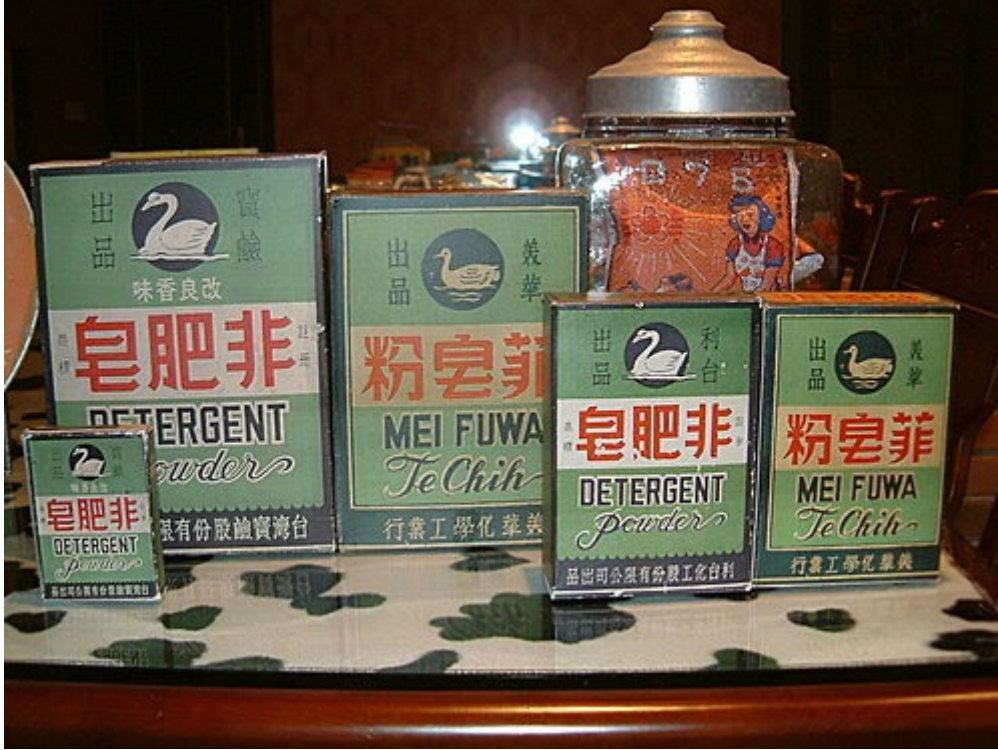

Soap/detergent

- Strongly disagree
- Disagree
- Slightly disagree
- Neutral
- Slightly agree
- Agree
- Strongly agree

Are there other objects from the 1960's that bring you a familiar feeling? \*

您的回答

This survey ends here! Thank you for your patient participation.

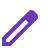

提交

請勿利用 Google 表單送出密碼。

Google 並未認可或建立這項內容。 [檢舉濫用情形](#) - [服務條款](#) - [隱私權政策](#)

Google 表單

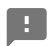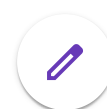

Supplement: games_v8i4e22007_app2.pdf [file games_v8i4e22007_app2.pdf]
